# Supplementary material for: Scarless one-tube genome assembly via computationally optimized uracil-DNA glycosylase reactions
Source: Royal Society of Chemistry journal article supplement (doi:10.1039/d5cb00317b), 2026-05-13
Supplement: d5cb00317b1.pdf [file d5cb00317b1.pdf]

## Scarless, One-Tube Genome Assembly via Computationally Optimized Uracil-DNA Glycosylase Reactions

Rachel M. Carson<sup>†</sup>, Patrick M. Needham<sup>†</sup>, Pedro J. Fernandez Mendoza, and Sam R. Nugen\*

*Department of Food Science, Cornell University, Ithaca, NY 14853, USA*

*\*snugen@cornell.edu*

*<sup>†</sup>These authors contributed equally to this work*

### Supplementary Information

## Supplementary Information

Supplemental Table S1: Primers and PCR Extension times

| Primer | Sequence                  |
|--------|---------------------------|
| F1.1-F | ACACGGCGAAUAGCCAUC        |
| F1.1-R | AGCGACCTUAAGCATTGUC       |
| F2.1-F | ACAATGCTUAAGGTCGUC        |
| F2.1-R | AAAGCTGTTGAGCUTGGTTUG     |
| F3.1-F | AAACCAAGCUCAACAGCTTUC     |
| F3.1-R | ACTCTGTAAGTTTCTUGCTTAGTUC |
| F4.1-F | AACTAAGCAAGAACTUACAGAGUC  |
| F4.1-R | ACCAGCCATTGUGTACTUC       |
| F5.1-F | AAGTACACAAUGGCTGGUG       |
| F5.1-R | ACGAAGGAAGCCTUCTTTCUC     |
| F6.1-F | AGAAAGAAGGCTUCCTTCGUG     |
| F6.1-R | ATCCGTGGTCTAUAGTGCAUC     |
| F7.1-F | ATGCACTAUAGACCACGGAUG     |
| F7.1-R | ATGGCTATUCGCCGTGUC        |

Supplemental Table S2: Primers for USER II optimization with fluorescent tags

| Primer | Sequence                     |
|--------|------------------------------|
| PC-F   | ACACGGCGAAUAGCCAUC           |
| PC-R   | AGCGACCTUAAGCATTGUC          |
| F1.1-F | /5SUN/ACACGGCGAAUAGCCAUC     |
| F1.1-R | /5TYE665/AGCGACCTUAAGCATTGUC |
| NC-F   | /5SUN/ACACGGCGAATAGCCATC     |
| NC-R   | /5TYE665/AGCGACCTTAAGCATTGTC |

Supplemental Table S3: Plaquing results of assembly transformation with varying concentrations of USER II.

| Raw Data used in Statistical Analysis |                   |                  |                |
|---------------------------------------|-------------------|------------------|----------------|
| Concentration of USER II              | <i>Taq</i> Ligase | Replicate Number | Titer (PFU/mL) |
| 5x                                    | Yes               | 1                | 1.83E+08       |
| 5x                                    | Yes               | 2                | 1.75E+08       |
| 5x                                    | Yes               | 3                | 2.20E+08       |
| 3.5x                                  | Yes               | 1                | 7.70E+07       |
| 3.5x                                  | Yes               | 2                | 1.01E+08       |
| 3.5x                                  | Yes               | 3                | 1.02E+08       |
| 2x                                    | Yes               | 1                | 1.17E+09       |
| 2x                                    | Yes               | 2                | 1.34E+09       |
| 2x                                    | Yes               | 3                | 1.97E+09       |
| 1x                                    | Yes               | 1                | 5.50E+08       |
| 1x                                    | Yes               | 2                | 5.10E+08       |
| 1x                                    | Yes               | 3                | 5.00E+08       |
| 5x                                    | No                | 1                | 2.33E+09       |
| 5x                                    | No                | 2                | 3.53E+09       |
| 5x                                    | No                | 3                | 3.11E+09       |
| 2x                                    | No                | 1                | 1.55E+08       |
| 2x                                    | No                | 2                | 2.23E+08       |
| 2x                                    | No                | 3                | 2.27E+08       |
| 0x                                    | Yes               | 1                | 0              |
| 0x                                    | Yes               | 2                | 0              |
| 0x                                    | Yes               | 3                | 0              |

Supplemental Table S4: Statistical analysis

| 2-Way ANOVA       |     |     |         |          |
|-------------------|-----|-----|---------|----------|
| Model term        | df1 | df2 | F.ratio | p.value  |
| Concentration     | 3   | 12  | 89.957  | 1.71E-08 |
| Concentration:Taq | 2   | 12  | 247.99  | 1.74E-10 |

| Tukey-adjusted Pairwise Comparison of the Efficiency of Means |           |          |          |    |      |          |          |
|---------------------------------------------------------------|-----------|----------|----------|----|------|----------|----------|
| Taq                                                           | Contrast  | Ratio    | SE       | df | null | t.ratio  | p.value  |
| Yes vs. Yes                                                   | 1x / 2x   | 0.356765 | 0.054167 | 12 | 1    | -6.78846 | 9.89E-05 |
| Yes vs. Yes                                                   | 1x / 3.5x | 5.612593 | 0.852149 | 12 | 1    | 11.36162 | 4.68E-07 |
| Yes vs. Yes                                                   | 1x / 5x   | 2.710173 | 0.41148  | 12 | 1    | 6.56672  | 0.000136 |
| Yes vs. Yes                                                   | 2x / 3.5x | 15.73191 | 2.388546 | 12 | 1    | 18.15008 | 2.52E-09 |
| Yes vs. Yes                                                   | 2x / 5x   | 7.596526 | 1.153366 | 12 | 1    | 13.35518 | 7.64E-08 |
| Yes vs. Yes                                                   | 3.5x / 5x | 0.482874 | 0.073314 | 12 | 1    | -4.7949  | 0.002133 |
| No vs. No                                                     | 2x / 5x   | 0.067441 | 0.010239 | 12 | 1    | -17.7602 | 5.96E-10 |

| Tukey-adjusted Pairwise Comparison of the Efficiency of Means between Taq vs. No Taq |              |          |          |    |          |          |
|--------------------------------------------------------------------------------------|--------------|----------|----------|----|----------|----------|
| Concentration                                                                        | Taq contrast | estimate | SE       | df | t.ratio  | p.value  |
| 2x                                                                                   | No - Yes     | -1.99181 | 0.151828 | 12 | -13.1188 | 1.78E-08 |
| 5x                                                                                   | No - Yes     | 2.732385 | 0.151828 | 12 | 17.99657 | 4.77E-10 |



Supplemental Figure SI-1: TYE665 3' tag of F1.1 for qPCR diagnostic of USER II digestion

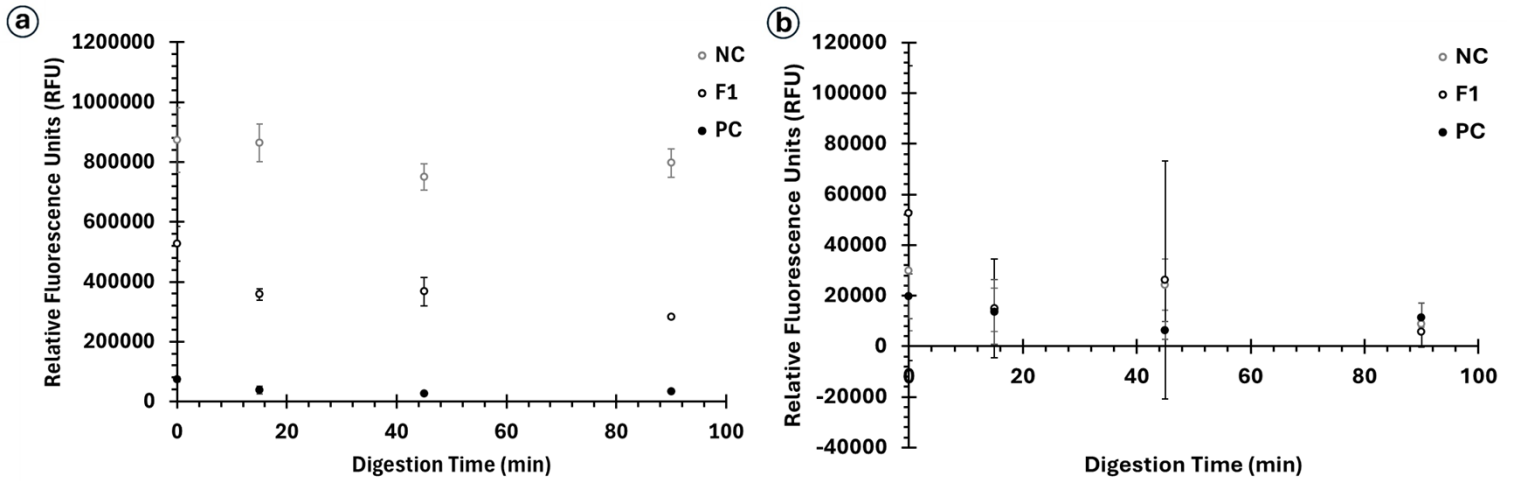

Supplemental Figure SI-1: Single time point qPCR results of time dependent digestion of fluorescently tagged 5' and 3' ends of generated fragments. (a) 5' end of fragment illustrating the effect of digestion on F1.1 as compared with fragment samples with fluorophore (NC) but without uracil integrated and fragment samples without fluorophores and with uracil integrated (PC). (b) 3' end of fragment illustrating the effect of digestion on F1.1 as compared with fragment samples with fluorophore (NC) but without uracil integrated and fragment samples without fluorophores and with uracil integrated (PC). Error bars are the standard deviation generated from n=6. Digestions are run at 1x USER II enzyme concentration.

Supplemental Figure SI-2: Relative Ligated Band Intensities

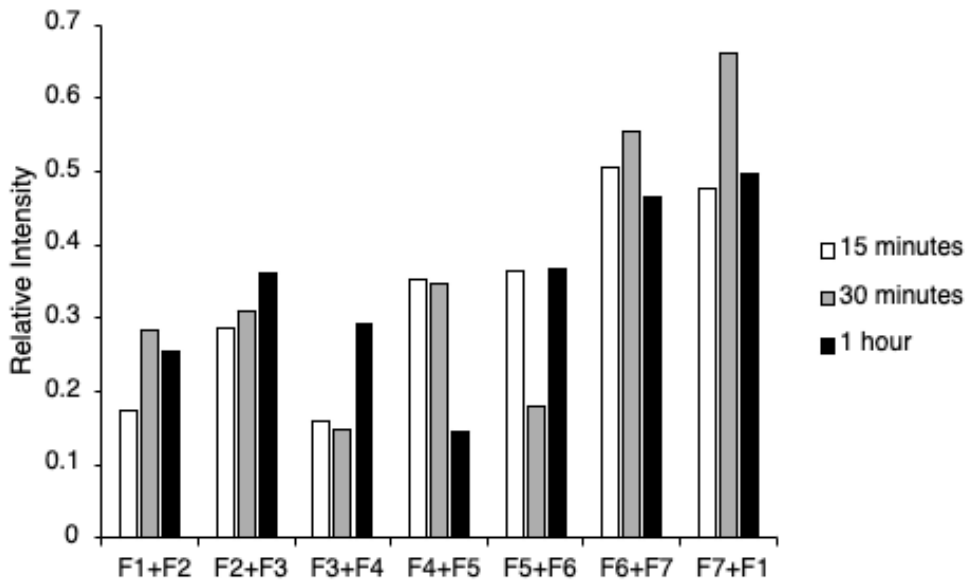

Supplemental Figure SI-2: ImageJ analysis of relative band intensities. 15-minute timepoints (white), 30-minute timepoints (grey), and 1-hour timepoints (black) are single point measurements.

Supplemental Figure SI-3: 0× USER II Plaque Results

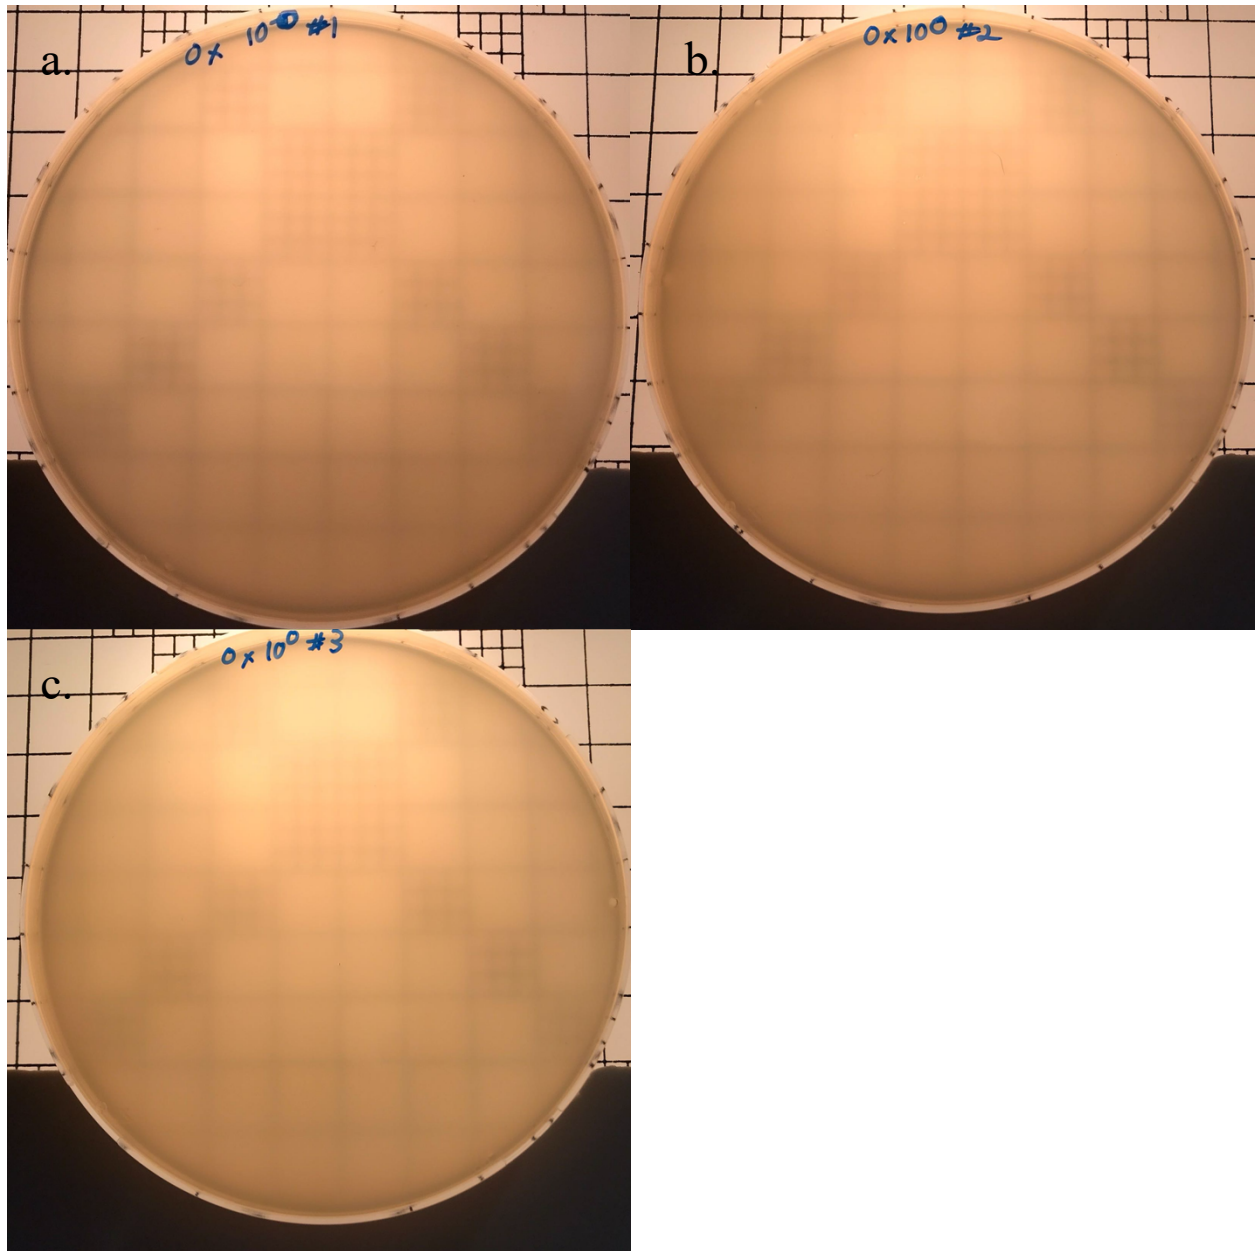

*Supplemental Figure SI-3: Full concentration (no dilution) plates of transformed E. coli cells with non-digested USER II DNA fragments (0× USER II). (a-c) are triplicates of examining plaque formation.*

Supplemental Data S1: Full DNA sequences of phages NRG-P0097 to NRG-P0104

>NRG-P0097

ATGCGTAACTTCGAAAAGATGACCAAACGTTCTAACCGTAATGCTCGTGACTTCGAGGCAACCAAAGGTCGCAAGTT  
GAATAAGACTAAGCGTGACCGCTCTCACAAGCGTAGCTGGGAGGGTCAGTAAGATGGGACGTTTTATATAGTGGTAAT  
CTGGCAGCATTCAAGGCAGCAACAAACAAGCTGTTCCAGTTAGACTTAGCGGTCATTTATGATGACTGGTATGATGC  
CTATACAAGAAAAGATTGCATACGGTTACGTATTGAGGACAGGAGTGGAAACCTGATTGATACTAGCACCTTCTACC  
ACCACGACGAGGACGTTCTGTTCAATATGTGTACTGATTGGTTGAACCATATGTATGACCAGTTGAAGGACTGGAAG  
TAATACGACTCAGTATAGGGACAATGCTTAAGGTCGCTCTCTAGGAGTGGCCTTAGTCATTTAACCAATAGGAGATA  
AACATTATGATGAACATTAAGACTAACCCGTTTTAAAGCCGTGTCTTTTCGTAGAGTCTGCCATTAAGAAGGCTCTGGA  
TAACGCTGGGTATCTTATCGCTGAAATCAAGTACGATGGTGTACGCGGGAACATCTGCGTAGACAATACTGCTAACA  
GTTACTGGCTCTCTCGTGTATCTAAAACGATTCCGGCCTGGAGCACTTAAACGGGTTTTGATGTTTCGCTGGAAGCGT  
CTACTGAACGATGACCGTTGCTTCTACAAAGATGGCTTTATGCTTGATGGGGAACCTCATGGTCAAGGGCGTAGACTT  
TAACACAGGGTCCGGCCTACTGCGTACCAAATGGACTGACACGAAGAACCAAGAGTCCATGAAGAGTTATTTCGTTG  
AACCAATCCGTAAGAAAAGATAAAGTTCCCTTTAAGCTGCACACTGGACACCTTCACATAAAAACGTACGCTATCCTC  
CCGCTGCACATCGTGGAGTCTGGAGAAGACTGTGATGTCTATGACGTTGCTCATGCAGGAACAGTTAAGAACATGCT  
GCCTCTGCTACAGGAATACTTCCCTGAAATCGAATGGCAAGCGGCTGAATCTTACGAGGCTACGATATGGTAGAAC  
TACAGCAACTGTACGAGCAGAAGCGAGCAGAAGGCCATGAGGGTCTCATTGTGAAAGACCCGATGTGTATCTATAAG  
CGCGGTAAGAAATCTGGCTGGTGGAAAATGAAACCTGAGAACGAAGCTGACGGTATCATTACAGGGTCTGGTATGGGG  
TACAAAAGGCTGGCTAATGAAGGTAAAGTGATTGGTTTTGAGGTGCTTCTTGAGAGTGGTCGTTTTAGTTAACGCCA  
CGAATATCTCTCGCGCCTTAATGGATGAGTTCCTGAGACAGTAAAAGAGGCCACCCTAAGTCAATGGGGATTCTTT  
AGCCCATACGGTATTGGCGACAACGATGCTTGTACTATTAACCTTACGATGGCTGGGCGTGTCAAATTAGCTACAT  
GGAGGAAACACCTGATGGCTCTTTGCGGCACCCATCGTTTCGTAATGTTCCGTGGCACCGAGGACAACCCCTCAAGAGA  
AAATGTAATCACACTGGCTCACCTTCGGGTGGGCCTTTCTGCGTTTTATAAGGAGACACTTTATGTTAAGAAGGTTG  
GTAAATTCCTTGGCGCTTTGGCAGCTATCCTGACGCTTGCCTATATTCTTGGCGTATACCCTCAAGTAGCACTAGTA  
GTAGTTGGCGCTTGTACTTAGCGGCAGTGTGTGCTTGCCTGTGGAGTATAGTTAACTGGTAATACGACTCACTAAA  
GGAGGTACACACCATGATGACTTAATGCCATTACTCATCGTCATTGTAGGATGCCTTGCCTCCACTGTAGCGATG  
ATGATATGCCAGATGGTCACGCTTAATACGACTCACTAAAGGAGACACTATATGTTTCGACTTCATTACAACAAAAG  
CGTTAAGAATTTACGGTTCGCCGTGCTGACCGTTCAATCGTATGTGCGAGCGAGCGCCGAGCTAAGATACCTCTTA  
TTGGTAACACAGTTCCTTTGGCACCGAGCGTCCACATCATTATCACCCGTGGTGACTTTGAGAAAAGCAATAGACAAG  
AAACGTCCGGTCTTAGTGTGGCAGTGACCCGCTTCCCGTTTCGTCCGTCTGTTACTCAAACGAATCAAGGAGGTGTT  
CTGATGGGACTGTTAGATGGTGAAGCCTGGGAAAAAGAAAACCCGCCAGTACAAGCAACTGGGTGTATAGCTTGCTT  
AGAGAAGATGACCGTTATCCACACACTGTAACAAGGAGCTAACGATATGACCGAACGTGAACAAGAGATGATCA  
TTAAGTTGATAGACAATAATGAAGGTGCGCCAGATGATTTGAATGGCTGCGGTATTCTCTGCTCCAATGTCCCTTGC  
CACCTCTGCCCCGCAAATAACGATCAAAGATAACCTTAGGTGAAATCCGAGCGATGGACCCACGTAAACCACATCT  
GAATAAACCTGAGGTAACCTTACAGATGACCAGCCTTCCGCTGAGACAATCGAAGGTGTCACTAAGCCTTCCCCT  
ACATGCTGTTTTGACGACATTGAGGCTATCGAAGTGATTGCTCGTTCAATGACCGTTGAGCAGTTCAAGGGATACTGC  
TTCGGTAACATCTTAAAGTACAGACTACGTGCTGGTAAGAAGTCAGAGTTAGCGTACTTAGAGAAAAGACCTAGCGAA  
AGCAGACTTCTATAAAGAACTCTTTGAGAAAACATAAGGATAAATGTTATGCATAACTTCAAGTCAACCCACCTGCC  
GACAGCCTATCTGATGACTTCACATCTTGTCTCAGAGTGGTGCCGAAAGATGTGGGAAGAGACATTGACGATGCGTA  
CATCAAGCTGTATGAACTTTGGAAATCGAGAGGTCAATGACTATGTCAAACGTAAATACAGGTTCACTTAGTGTGGA  
CAATAAGAAGTTTTGGGCTACCGTAGAGTCTCGGAGCATTCTTCCGAGGTTCCAATCTACGCTGAGACCCTAGACG  
AAGCTCTGGAGTTAGCCGAATGGCAATACGTTCCGGCTGGCTTTGAGGTTACTCGTGTGCGTCTTGTGTAGCACCG  
AAGTAATACGACTCACTATTAGGGAAGACTCCCTCTGAGAAACCAAACGAAACCTAAAGGAGATTAACATTATGGCT  
AAGAAGATTTTACCTCTGCGCTGGGTACCGCTGAACCTTACGCTTACATCGCCAAGCCGGACTACGGCAACGAAGA  
GCGTGGCTTTGGGAACCCCTCGTGGTGTCTATAAAGTTGACCTGACTATTCCCAACAAAGACCCGCGCTGCCAGCGTA  
TGGTCGATGAAATCGTGAAGTGTACGAAGAGGCTTATGCTGCTGCCGTTGAGGAATACGAAGCTAATCCACCTGCT  
GTAGCTCGTGGTAAGAAACCGCTGAAACCGTATGAGGGTGACATGCCGTTCTTCGATAACGGTGACGGTACGACTAC  
CTTTAAGTTCAAATGCTACGCGTCTTTCCAAGACAAGAAGACCAAAGAGACCAAGCACATCAATCTGGTTGTGGTTG  
ACTCAAAGGTAAGAAGATGGAAGACGTTCCGATTATCGGTGGTGGCTCTAAGCTGAAAGTTAAATATTCTCTGGTT  
CCATAAAGTGAAGACACTGTGTAGGTGCGAGCATTAAAGTGAACCTGGAATCCGTGATGCTGGTCAACTGGCTAC  
CTTTGGTGGCGGTGAAGACGATTGGGCTGACGAAGTTGAAGAGAACCGCTATGTTGCCTCTGGTTCTGCCAAACGCA  
GCAAACCACGCGACGAAGAAAGCTGGGACGAAGACGACGAAGAGTCCGAGGAAGCAGACGAAGACGGGAGACTTCTAA  
GTGGAACCTGCGGGAGAAAATCCTTGGAGCAATCAAGGTGACTTCTCTGGGTGTTGGGAGTGGCAGGGCGCTACGAA  
CAATAAAGGGTACGGGCAGGTGTGGTGCAGCAATACCGGAAAGGTTGTCTACTGTCATCGCGTAATGTCTAATGCTC  
CGAAAGGTTCTACCGTCTGCACTCCTGTGATAATCCATTATGTTGTAACCCTGAACACCTATCCATAGGAACTCCA  
AAAGAGAACTCCACTGACATGGTAAATAAGGGTCGCTCACACAAGGGGTATAAACTTTTCAGACGAAGACGTAATGGC

AATCATGGAGTCCAGCGAGTCCAATGTATCCTTAGCTCGCACCTATGGTGTCTCCCAACAGACTATTTGTGATATAC  
GCAAAGGGAGGCGCATGGCAGGTTACGGCGCTAAAGGAATCCGAAAGGTTGGAGCGTTTCGCTCTGGCCTAGAGGA  
CAAGGTTTTCAAAGCAGTTGGAATCAAAGGTATTAATTCGAGTATGAAGAGTGGAAAGTGCCTTATGTAATCCGG  
CGAGCAATCACACTTACACTCCAGACTTCTTACTTCCAAACGGTATATTCGTTGAGACAAAGGGTCTGTGGGAAAGC  
GATGATAGAAAGAAGCACTTATTAATTAGGGAGCAGCACCCCGAGCTAGACATCCGTATTGTCTTCTCAAGCTCACG  
TACTAAGTTATACAAAGGTTCTCCAACGTCTTATGGAGAGTTCTGCGAAAAGCATGGTATTAAGTTCGCTGATAAAC  
TGATACCTGCTGAGTGGATAAAGGAACCCAAGAAGGAGGTCCCCTTTGATAGATTAAGGAAAGGAGGAAAGAAA  
TAATGGCTCGTGTACAGTTTAAACAACGTGAATCTACTGACGCAATCTTTGTTCACTGCTCGGCTACCAAGCCAAGT  
CAGAATGTTGGTGTCCGTGAGATTCCGCCAGTGGCACAAGAGCAGGGTTGGCTCGATGTGGGATAACCACTTTATCAT  
CAAGCAGAGCCGTACTGTGGAGGCAGGACGAGATGAGATGGCTGTAGGCTCTCACGCTAAGGGTTACAACCAACT  
CTATCGGCGTCTGCCTTGTGGTGGTATCGACGATAAAGGTAAAGTTTCGACGCTAACTTTACGCCAGCCAAATGCAA  
TCCCCTTCGCTCACTGCTTGTACACTGCTGGCTAAGTACGAAGGCGCTGTGCTTCGCGCCCATCATGAGGTGGCGCC  
GAAGGCTTGCCCTTCGTTTCGACCTTAAGCGTTGGTGGGAGAAGAACGAAGTGGTCACTTCTGACCGTGGATAATTA  
TTGAACTCACTAAAGGGAGACCACAGCGGTTTCCCCTTTGTTTCGCATTGGAGGTCAAATAATGCGCAAGTCTTATAAA  
CAATTCTATAAGGCTCCGAGGAGGCATATCCAAGTGTGGGAGGCAGCCAATGGGCTTATACCAAAAGGTTATTATAT  
AGACCACATTGACGGCAATCCACTCAACGACGCCTTAGACAATCTCCGTCTGGCTCTCCCAAAAGAAAACCTCATGGA  
ACATGAAGACTCCAAAGAGCAATACCTCAGGACTAAAGGGACTGAGTTGGAGCAAGGAAAGGGAGATGTGGAGAGGC  
ACTGTAACAGCTGAGGGTAAACAGCATAACTTTTCGTAGTAGAGATCTATTGGAAGTCGTTGCGTGGATTTATAGAAC  
TAGGAGGGAATTGCATGGACAATTCGCACGATTCCGATAGTGTATTTCTTTACCACATTCCTTGTGACAACCTGTGGG  
AGTAGTGATGGGAACTCGCTGTTCTCTGACGGACACACGTTCTGCTACGTATGCGAGAAGTGGACTGCTGGTAATGA  
AGACACTAAAGAGAGGGCTTCAAACGGAACCCCTCAGGAGGTAAACCAATGACTTACAACGTGTGGAACCTTCGGGG  
AATCCAATGGACGCTACTCCGCGTTAACTGCGAGAGGAATCTCCAAGGAAACCTGTCAGAAGGCTGGCTACTGGATT  
GCCAAAGTAGACGGTGTGATGTACCAAGTGGCTGACTATCGGGACCAGAACGGCAACATTGTGAGTCAGAAGGTTTCG  
AGATAAAGATAAGAACTTTAAGACCCTGGTAGTCACAAGAGTGACGCTCTGTTTCGGGAAGCACTTGTGGAATGGTG  
GTAAGAAGATTGTGCTTACAGAAGGTGAAATCGACATGCTTACCGTGATGGAACCTCAAGACTGTAAGTATCCTGTA  
GTGTCGTTGGGTACGGTGCCTCTGCCGCTAAGAAGACATGCGCTGCCAACTACGAATACTTTGACCAGTTCGAACA  
GATTATCTTAATGTTTCGATATGGACGAAGCAGGGCGCAAAGCAGTCGAAGAGGCTGCACAGGTTCTACCTGCTGGTA  
AGGTACGAGTGGCAGTCTTCCGTGTAAGGATGCAAACGAGTGTCACTAAATGGTCACGACCGTGAATCATGGAG  
CAAGTGTGGAATGCTGGTCCCTGGATTCCCTGATGGTGGTATCGGCTCTTTTCGTTACGTGAACGAATCCGTGAGCA  
CCTATCGTCCGAGGAATCAGTAGGTTTACTTTTTAGTGGCTGCACCTGGTATCAACGATAAAGCCTTAGGTGCCCGTG  
GTGGTGAAGTCATTATGGTCACTTCCGGTTCGGGTATGGGTAAGTCAACGTTTCGTCGGTCAACAAGCTCTACAATGG  
GGCACAGCGATGGGCAAGAAGGTAGGCTTAGCGATGCTTGAGGAGTCCGTTGAGGAGACCCTGAGGACCTTATAGG  
TCTACACAACCGTGTCCGACTGAGACAATCCGACTCACTAAAGAGAGAGATTATTGAGAACGGTAAGTTCGACCAAT  
GGTTCGATGAACTGTTTCGGCAACGATACGTTCCATCTATATGACTCATTTCGCCGAGGCTGAGACGGATAGACTGCTC  
GCTAAGCTGGCCTACATGCGCTCAGGCTTGGGCTGTGACGTAATCATTCTAGACCACATCTCAATCGTTCGTATCCGC  
TTCTGGTGAATCCGATGAGCGTAAGATGATTGACAACCTGATGACCAAGCTCAAAGGGTTCGCTAAGTCAACTGGGG  
TGGTGTGCTCGTAATTTGTACCTTAAGAACCCAGACAAAGGTAAGGCACATGAGGAAGGTCGCCCCGTTTCTATT  
ACTGACCTACGTGGTTCGCGCCTACGCCAACTATCTGATACTATTATTGCCCTTGAGCGTAATCAGCAAGGCGA  
TATGCCTAACCTTGTCTCGTTCGTATTCTCAAGTCCGCTTTACTGGTGATACTGGTATCGCTGGCTACATGGAAT  
ACAACAAGGAAACCGGATGGCTTGAACCATCAAGTACTCAGGGGAAGAAGAGTCACACTCAGAGTCAACAGACTGG  
TCCAACGACACTGACTTCTGACAGGATTCTTGATGACTTTCCAGACGACTACGAGAAGTTCGCTGGAGAGTCCCAT  
TCTAATACGACTCACTAAAGGAGACACACCATGTTCAAACCTGATTAAGAAGTTAGGCCAACTGCTGGTTTCGTATGTA  
CAACGTGGAAGCCAAGCGACTGAACGATGAGGCTCGTAAAGAGGCCACACAGTCACGCGCTCTGGCGATTTCGCTCCA  
ACGAACTGGCTGACAGTGCATCCACTAAAGTTACCGAGGCTGCCCGTGTGGCAAACCAAGCTCAACAGCTTTCCAAA  
TTCTTTGAGTAATCAAACAGGAGAAACCATTATGTCTAACGTAGCTGAAACTATCCGTCTATCCGATACAGCTGACC  
AGTGAACCGTCGAGTCCACATCAACGTTTCGCAACGGTAAGGCAGCTATGGTTTACCCTGGAAGGACTCTAAGTCC  
TCTAAGAATCACACTCAGCGTATGACGTTGACAGATGAGCAAGCACTGCGTCTGGTCAATGCGCTTACCAAAGCTGC  
CGTGACAGCAATTCATGAAGCTGGTTCGCGTCAATGAAGCTATGGCTATCCTCGACAAGATTGATAACTAAGAGTGGT  
ATCCTCAAGGTCGCCAAAGTGGTGGCCTTCATGAATACTATTTCGACTCACTATAGGAGATATTACCATGCGTGACCC  
TAAAGTTATCCAAGCAGAAATCGCTAAACTGGAAGCTGAACTGGAGGACGTTAAGTACCATGAAGCTAAGACTCGCT  
CCGCTGTTACATCTTGAAGAACTTAGGCTGGACTTGGACAAGACAGACTGGCTGGAAGAAACCAGAAGTTACCAAG  
CTGAGTCATAAGGTGTTTCGATAAGGACACTATGACCCACATCAAGGCTGGTGATTGGGTTAAGGTTGACATGGGAGT  
TGTTGGTGGATACGGCTACGTCCGCTCAGTTAGTGGCAAATATGCACAAGTGTACATACATCACAGGTGTTACTCCAC  
GCGGTGCAATCGTTGCCGATAAGACCAACATGATTACACACAGGTTTCTTGACAGTTGTTTCATATGAAGAGATTGTT  
AAGTCACGATAATCAATAGGAGAAATCAATATGATCGTTTCTGACATCGAAGCTAACGCCCTCTTAGAGAGCGTCCAC  
TAAGTTCCACTGCGGGGTTATCTACGACTACTCCACCGCTGAGTACGTAAGCTACCGTCCGAGTGACTTCGGTGCCT  
ATCTGGATGCGCTGGAAGCCGAGGTTGCACGAGGCGGCTTATTGTGTTCCACAACGGTCAACAGTATGACGTTCT

GCATTGACCAAACCTGGCAAAGTTGCAATTGAACCGAGAGTTCCACCTTCCTCGTGAGAAGTGTATTGACACCCTTGT  
GTTGTACAGTTTTGATTCATTCCAACCTCAAGGACACCGATATGGGTCTTCTGCGTTCGGCAAGTTGCCCGGAAAAC  
GCTTTGGGTCTCACGCTTTGGAGGCGTGGGGTTATCGCTTAGGCGAGATGAAGGGTGAATACAAAGACGACTTTAAG  
CGTATGCTTGAAGAGCAGGGTGAAGAATACGTTGACGGAATGGAGTGGTGGAACTTCAACGAAGAGATGATGGACTA  
TAACGTTTCAGGACGTTGTGGTAACTAAAGCTCTCCTTGAGAAGCTACTCTCTGACAAACATTACTTCCCTCCTGAGA  
TTGACTTTACGGACGTAGGATACACTACGTTCTGGTCAGAATCCCTTGAGGCCGTTGACATTGAACATCGTGCTGCA  
TGGCTGCTCGCTAAACAAGAGCGCAACGGGTTCCCGTTTGACACAAAAGCAATCGAAGAGTTGTACGTAGAGTTAGC  
TGCTCGCCGCTCTGAGTTGCTCCGTAAATTGACCGAAACGTTCCGGCTCGTGGTATCAGCCTAAAGGTGGCACTGAGA  
TGTTCTGCCATCCGCGAACAGGTAAGCCACTACCTAAATACCTTCGCATTAAGACACCTAAAGTTGGTGGTATCTTT  
AAGAAGCCTAAGAACAAGGACAGCGAGAAGGCCGTGAGCCTTGCGAACCTGATACCCGCGAGTACGTTGCTGGTGC  
TCCTTACACCCCAAGTTGAACATGTTGTGTTTAAACCTTCGCTCTCGTGACCACATTCAGAAGAACTCCAAGAGGCTG  
GGTGGGTTCCCGACCAAGTACACCGATAAGGGTCTCCTGTGGTGGACGATGAGGTACTCGAAGGAGTACGTGTAGAT  
GACCCTGAGAAGCAAGCCGCTATCGACCTCATTAAAGAGTACTTGATGATTGAGAAGCGAATCGGACAGTCTGCTGA  
GGGAGACAAAGCATGGCTTCGTTATGTTGCTGAGGATGGTAAGATTGATGTTCTGTTAACCTAATGGAGCAGTTA  
CGGGTCTGTCGACCCATGCGTTCCCAAACCTTGCGCAAATTCGGGTGTACGTTCTCCTTATGGAGAGCAGTGTGCG  
GCTGCTTTTGGCGCTGAGCACCATTTGGATGGGATAACTGGTAAGCCTTGGGTTCCAGGCTGGCATCGACGCATCCGG  
TCTTGAGCTACGCTGCTTGGCTCACTTCATGGCTCGCTTTGATAACGGCGAGTACGCTCACGAGATTCTTAACGGCG  
ACATCCACACTAAGAACCAGATAGCTGCTGAACTACCTACCCGAGATAACGCTAAGACGTTTCATCTATGGGTTCCCTC  
TATGGTGTCTGGTGTAGAGAAGATTGGACAGATTGTTGGTGTCTGGTAAAGAGCGCGGTAAGGAACTCAAGAAGAAAT  
CCTTGAGAACACCCCGCGATTGCAGCACTCCGCGAGTCTATCCAACAGACACTTGTGAGTCTCTCAATGGGTAG  
CTGGTGAGCAACAAGTCAAGTGGAAACGCCGCTGGATTAAGGCTGGATGGTCTGTAAGGTACACGTTTCGTAGTCTC  
CACGCTGCCTTGAATACCCTACTGCAATCTGCTGGTGTCTCATCTGCAAACCTGTGGATTATCAAGACCGAAGAGAT  
GCTCGTAGAGAAAGGCTTGAAGCATGGCTGGGATGGGGACTTTGCGTACATGGCATGGGTACATGATGAAATCCAAG  
TAGGCTGCCGTACCGAAGAGATTGCTCAGGTGGTCATTGAGACCCGACAAAGAAGCGATGCGCTGGGTTGGAGACCAC  
TGGAACCTCCGGTGTCTTCTGGATACCGAAGGTAAGATGGGTCTAATTGGGCGATTTGCCACTGATACAGGAGGCT  
ACTCATGAACGAAAGACACTTAACAGGTGCTGCTTCTGAAATGCTAGTAGCCTACAAATTTACCAAAGCTGGGTACA  
CTGTCTATTACCCTATGCTGACTCAGAGTAAAGAGGACTTGGTTGTATGTAAGGATGGTAAATTTAGTAAGGTTTCAG  
GTTAAAACAGCCACAACGGTTCAAACCAACACAGGAGATGCCAAGCAGGTTAGGCTAGGTGGATGCGGTAGGTCCGA  
ATATAAGGATGGAGACTTTGACATTTCTGCGGTTGTGGTTGACGAAGATGTGCTTATTTTTACATGGGACGAAGTAA  
AAGGTAAGACATCCATGTGTGTGCGCAAGAGAAAACAAAGGCATAAAACTATAGGAGAAATTTATGATGGCTATGACAA  
AGAAATTTAAAGTGTCTTTCGACGTTACCGCAAAGATGTGCTCTGACGTTCCAGGCAATCTTAGAGAAAGATATGCTG  
CATCTATGTAAGCAGGTCCGGCTCAGGTGCGATTGTCCCAATGGTAAACAGAAGGAAATGATTGTCCAGTTCCCTGAC  
ACACGGTATGGAAGGATTGATGACATTGCTAGTACGTACATCATTTTCGTGAGGCCATTAAGGACATGCACGAAGAGT  
ATGCAGATAAGGACTCTTTCAAACAATCTCCTGCAACAGTACGGGAGGTGTTCTGATGTCTGACTACCTGAAAGTGC  
TGCAAGCAATCAAAGTTGCCCTAAGACTTTCCAGTCCAATATGTACGGAACAATGCGAGCCTCGTAGCGGAGGCC  
GCTTCCCGTGGTCACATCTCGTGCCTGACTACTAGTGGACGTAACGGTGGCGCTTGGGAAATCACTGCTTCCGGTAC  
TCGCTTTCTGAAACGAATGGGAGGATGTGTCTAATGTCTCGTGACCTTGTGACTATTCCACGCGATGTGTGGAACGA  
TATACAGGGCTACATCGACTCTCTGGAACGTGAGAACGATAGCCTTAAGAATCAACTAATGGAAGCTGACGAATACG  
TAGCGGAACTAGAGGAGAACTTAATGGCACTTCTTGACCTTAAACAATTTCTATGAGTTACGTGAAGGCTGCGACGA  
CAAGGGTATCCTTGTGATGGACGGCGACTGGCTGGTCTTCCAAGCTATGAGTGTGCTGAGTTTTGATGCCTCTTGGG  
AGGAAGAGATTTGGCACCGATGCTGTGACCACGCTAAGGCCCGTCAGATTCTTGAGGATTCCATTAAGTCCCTACGAG  
ACCCGTAAGAAGGCTTGGGCAGGTGCTCCAATTGTCTTTCGCTTCCCGATAGTGTAACTGGCGTAAAGAAGTGGT  
TGACCCGAACATAAGGCTAACCCTAAGGCCGTGAAGAAACCTGTAGGGTACTTTGAGTTCCTTGATGCTCTCTTTG  
AGCGCGAAGAGTTCTATTGCATCCGTGAGCCTATGCTTGAGGGTGTAGCCTTATGGGAGTTATTGCTTCCAATCCG  
TCTGCCTTCGGTGTCTGTAAGGCTGTAATCATCTCTTTCGATAAAGGACTTAAAGACCATCCCTAACTGTGACTTCT  
GTGGTGTACCACTGGTAACATCTGACTCAGACCGAAGAGTCCGCTGACTGGTGGCACCTTCTCCAGACCATCAAGG  
GTGACATCACTGATGGTTACTCAGGGATTGCTGGATGGGGTATACCCGCCGAGGACTTCTTGAATAACCCGTTCCATA  
ACCGAGCCTAAAACGTCTGTGCTTAAAGTCCGGTAAAGAACAAGGCCAAGAGGTTACTAAATGGGTTAAACCGCACCC  
TGAGCCTCATGAGACGCTTTGGGACTGCATTAAGTCCATTGGCGCAAGGCTGGTATGACCGAAGAGGATATTATCA  
AGCAGGGCCAAATGGCTCGAATCCTACGGTTCAACGAGTACAACCTTTATTGACAAGGAGATTTACCTGTGGAGACCG  
TAGCGTATATTGGTCTGGGTCTTTGTGTTCTCGGAGTGTGCCTCATTTTCGTGGGGCCTTTGGGACTTAGCCAGAATA  
ATCAAGTCGTTACACGACACTAAGTGATAAACTCAAGGTCCCTAAATTAATACGACTCACTATAGGGAGATAGGGGC  
CTTTACGATTATTACTTTAAGATTTAACTCTAAGAGGAATCTTTATTATGTTAACACCTATTAACCAATTACTTAAG  
AACCTAACGATATTCCAGATGTACCTCGTGCAACCGCTGAGTATCTACAGGTTTCGATTCAACTATGCGTACCTCGA  
AGCGTCTGGTCATATAGGACTTATGCGTGCTAATGGTTGTAGTGAGGCCACATCTTGGGTTTCATTACGGGCTTAC  
AGTATGCCTCTAACGTCATTGACGAGATTGAGTTACGCAAGGAACAACCTAAGAGATGATGGGGAGGATTGACACTAT  
GTGTTTCTCACCGAAAATTTAAACTCCGAAGATGGATACCAATCAGATTTCGAGCCGTTGAGCCAGCGCCTCTGACCC

AAGAAGTGTCAAGCGTGGAGTTCGGTGGGTCTTCTGATGAGACGGATACCGAGGGCACC GAAGTGTCTGGACGCAA  
GGCCTCAAGGTGCAACGTGATGATTCCGTAGCGAAGTCTAAAGCCAGCGGCAATGGCTCCGCTCGTATGAAATCTTC  
CATCCGTAAGTCCGCATTTGGAGGTAAGAAGTGTGTCTGAGTTCACATGTGTGGAGGCTAAGAGTCGCTTCCGTGC  
AATCCGGTGGACTGTGGAACACCTTGGGTTGCCTAAAGGATTTCGAAGGACACTTTGTGGGCTACAGCCTCTACGTAG  
ACGAAGTGTGGACATGTCTGGTTGCCGTGAAGAGTACATTCTGGACTCTACCGGAAAACATGTAGCGTACTTCCGG  
TGGTGCCTAAGCTGTGACATTCACCACAAAGGAGACATTCTGGATGTAACGTCCGTTGTCAATTAATCCTGAGGCAGA  
CTCTAAGGGCTTACAGCGATTCCCTAGCGAAAACGCTTTAAGTACCTTGCAGGAACTCCACGATTGCGATTGGGTGTCTC  
GTTGTAAGCATGAAGGCGAGACAATGCGTGTATACTTTAAGGAGGTATAAGTTATGGGTAAGAAAAGTTAAGAAGGCC  
GTGAAGAAAAGTCACCAAGTCCGTTAAGAAAAGTCGTTAAGGAAGGGGCTCGTCCGGTTAAACAGGTTGTGGCGGTCT  
AGTGGTCTGGCTGGTACTGGTGAAGCACAGATGGTGAAGTACCACAAGCTGCCGCACAGATTGTTGACGTAC  
CTGAGAAAAGAGTTTCCACTGAGGACGAAGCACAGACAGAAAAGCGGACGCAAGAAAAGCTCGTGTGGCGGTAAGAAA  
TCCTTGAGTGTAGCCCCTAGCTCCGGTGGCGGTATCAACATTTAATCAGGAGGTTATCGTGAAGACTGCATTGAAT  
GGACCGGAGGTGTCAACTCTAAGGGTTATGGTCGTAAGTGGGTTAATGGTAAACTTGTGACTCCACATAGGCACATC  
TATGAGGAGACATATGGTCCAGTTCACACAGGAATTGTGGTGTATGCATATCTGCGATAACCTTAGGTGCTATAACAT  
AAAGCACCTTACGCTTGGAACTCCAAAGGATAATTCCGAGGACATGGTTACCAAAGGTAGACAGGCTAAAGGAGAGG  
AACTAAGCAAGAACTTACAGAGTCAGACGTTCTCGCTATACGCTCTTCAACCTTAAGCCACCGCTCCTTAGGAGAA  
CTGTATGGAGTCAGTCAATCAACCATAACGCGAATACTACAGCGTAAGACATGGAGACACATTTAATGGCTGAGAAA  
CGAACAGGACTTGCAGGAGGATGGCGCAAAGTCTGTCTATGAGCGTTTAAAGAACGACCGTGTCTCCCTATGAGACACG  
CGCTCAGAATTGCGCTCAATATAACCATCCCATCATTGTTCCCTAAGGACTCCGATAACGCCTCTACAGATTATCAAA  
CTCCGTGGCAAGCCGTGGGCGCTCGTGGTCTGAACAATCTAGCCTCTAAGCTCATGCTGGCTCTATTCCCTATGCAG  
ACTTGGATGCGACTTACTATATCTGAATATGAAGCAAAGCAGTTACTGAGCGACCCCGATGGACTCGCTAAGGTGCA  
TGAGGGCCTCTCGATGGTAGAGCGTATCATCATGAACTACATTGAGTCTAACAGTTACCGCGTACTCTCTTTGAGG  
CTCTCAAACAGTTAGTCGTAGCTGGTAACGTCCGTGTACCTACCGGAACCGGAAGGGTCAAACCTATAATCCCATG  
AAGCTGTACCGATTGTCTTCTTATGTGGTCCAACGAGACGCATTCGGCAACGTTCTGCAAATGGTACTCGTGACCA  
GATAGCTTTTGGTGTCTCTCCCTGAGGACATCCGTAAGGCTGTAGAAGGTCAAGGTGGTGAGAAGAAAAGCTGATGAGA  
CAATCGACGTGTACTACTCACATCTATCTGGATGAGGACTCAGGTGAATACCTCCGATACGAAGAGGTGAGGGGTATG  
GAAGTCCAAGGCTCCGATGGGACTTATCCTAAAGAGGCTTGCCCATACATCCCGATTCCGGATGGTCAGACTAGATGG  
TGAATCTACGGTCTGTTGCTACATTGAGGAATACTTAGTGACTTACGGTCCCTTGAAAATCTCCAAGAGGCTATCG  
TCAAGATGTCCATGATTAGCTCTAAGGTTATCGGCTTAGTGAATCTCTGCTGGTATCACCCAGCCAGCCGACTGACC  
AAAGCTCAGACTGGTACTTCTGTTACTGGTCTCGTCCAGAAGACATCTCGTTCCTCAAACCTGGAGAAGCAAGCAGACTT  
TACTGTAGCTAAAGCCGTAAGTGACGCTATCGAGGCTCGCCTTTTCGTTTGCCTTTATGTTGAACTCTGCGGTTT  
GTACAGGTGAACGTGTGACCGCCGAAGAGATTCCGGTATGTAGCTTCTGAACTTGAAGATACTTTAGGTGGTGTCTAC  
TCTATCCTTTCTCAAGAATTACAATTGCCTCTGGTACGAGTGCTCTTGAAGCAACTACAAGCCACGCAACAGATTCC  
TGAGTTACCTAAGGAAGCCGTAGAGCCAACCATTAGTACAGGTCTGGAAGCAATTGGTTCGAGGACAAGACCTTGATA  
AGCTGGAGCGGTGTGTCACTGCGTGGGCTGCACTGGCACCTATGCGGGACGACCCTGATATTAACCTTGCAGTATT  
AAGTTACGTATTGCCAACGCTATCGGTATTGACACTTCTGGTATTCTACTCACCGAAGAACAGAAGCAACAGAAGAT  
GGCCCAACAGTCTATGCAAATGGGTATGGATAATGGTGTCTGCTGCGCTGGCTCAAGGTATGGCTGCACAAGCTACAG  
CTTACCTGAGGCTATGGCTGCTGCCGCTGATTCCGTAGGTTTACAGCCGGGAATTTAATACGACTCACTATAGGGA  
GACCTCATCTTTGAAATGAGCGATGACAAGAGGTTGGAGTCTCGGTCTTCTCTGTAGTTCAACTTTAAGGAGACAAT  
AATAATGGCTGAATCTAATGCAGACGTATATGCATCTTTTGGCGTGAACCTCCGCTGTGATGTCTGGTGGTTCCGTTG  
AGGAACATGAGCAGAACATGCTGGCTCTTGATGTTGCTGCCCGTGTATGGCGATGATGCAATCGAGTTAGCGTCAGAC  
GAAGTGGAAACAGAACGTGACCTGTATGACAACCTCTGACCCGTTCCGGTCAAGAGGATGACGAAGGCCGCATTCAGGT  
TCGTATCCGGTGTATGGCTCTGAGCCGACCGATGTGGACACTGGAGAAGAAGGCGTTGAGGGCACCGAAGGTTCCGAAG  
AGTTTACCCCACTGGGCGAGACTCCAGAAGAACTGGTAGCTGCCTCTGAGCAACTTGGTGAGCACGAAGAGGGCTTC  
CAAGAGATGATTAACATTGCTGCTGAGCGTGGCATGAGTGTGAGACCAATTGAGGCTATCCAGCGTGAGTACGAGGA  
GAACGAAGAGTTGTCCGCCGAGTCCCTACGCTAAGCTGGCTGAAATTTGGCTACACGAAGGCTTTTATTGACTCGTATA  
TCCGTGGTCAAGAAGCTCTGGTGGAGCAGTACGTAACAGTGTCTATTGAGTACGCTGGTGGTCTGTAACGTTTTGAT  
GCACTGTATAACCACCTTGGAGCGACAACCCTGAGGCTGCACAGTCTGATAATGCGTTGACCAATCGTGACTT  
AGCGACCGTTAAGGCTATCATCAACTTGGCTGGTGGTCTCGCGCTAAGGCGTTCCGGTGTGTAAGCAACTCGTAGTG  
TGACTAATCGTGCTATTCCGGCTAAACCTCAGGCTACCAAGCGTGAAGGCTTTGCGGACCGTAGCGAGATGATTA  
GCTATGAGTGACCCTCCGGTATCGCACAGATGCCAACTATCGTCTGCAAGTTCGAACAGAAAAGTAATCGATTTCGA  
CTGATAGACTTTCGAAATTAATACGACTCACTATAGGGAGACCACAACGGTTTTCCCTCTAGAAAATAATTTTGT  
TTAAGAAGGAGATATACATATGGCTAGCATGACTGGTGGACAGCAAATGGGTACTAACCAAGGTAAAGGTGTAGTT  
GCTGCTGGAGATAAACTGGCGTTGTTCTTGAAGGTATTTGGCGGTGAAGTCTGACTGCGTTCGCTCGTACCTCCGT  
GACCACTTCTCGCCACATGGTACGTTCCATCTCCAGCGTAAATCCGCTCAGTTCCTGTTCTGGGTGCGACTCAGG  
CAGCGTATCTGGCTCCGGGCGAGAACCCTCGACGATAAACGTAAGGACATCAAACACACCGAGAAGGTAATCACCATT  
GACGGTCTCCTGACGGCTGACGTTCTGATTTATGATATTGAGGACGCGATGAACCACTACGACGTTCCGCTCTGAGTA

TACCTCTCAGTTGGGTGAATCTCTGGCGATGGCTGCGGATGGTGCGGTTCTGGCTGAGATTGCCGGTCTGTGTAACG  
TGGAAAGCAAATATAATGAGAACATCGAGGGCTTAGGTACTGCTACCGTAATTGAGACCACTCAGAACAAGGCCGCA  
CTTACCAGCAAGTTGCGCTGGGTAAGGAGATTATTGCGGCTCTGACTAAGGCTCGTGCGGCTCTGACCAAGAACTA  
TGTTCCGGCTGCTGACCGTGTGTTCTACTGTGACCCAGATAGCTACTCTGCGATTCTGGCAGCACTGATGCCGAACG  
CAGCAAACCTACGCTGCTCTGATTGACCCTGAGAAGGGTTCTATCCGCAACGTTATGGGCTTTGAGGTTGTAGAAGTT  
CCGCACCTCACCGCTGGTGGTGTGGTACCCTCGTGAGGGCACTACTGGTCAGAAGCACGTCTTCCCTGCCAATAA  
AGGTGAGGGTAATGTCAAGGTTGCTAAGGACAACGTTATCGGCCTGTTTCATGCACCGCTCTGCGGTAGGTACTGTTA  
AGCTGCGTGACTTGGCTCTGGAGCGCGCTCGCCGTGCTAACTTCCAAGCGGACCAGATTATCGCTAAGTACGCAATG  
GGCCACGGTGGTCTTCGCCCAGAAGCTGCTGGTGCAGTGGTTTTCAAAGTGGAGTAATGCTGGGGGTGGCCTCAACG  
GTCGCTGTAGTCCCCGAAGAGGCGAGTGTACTTCAACAGAAGAAACCTTAACGCCAGCAGGAGGCGCACGCAC  
CCGCGCTTAACAAAGCCCCGAAAGGAAGCTGAGTTGGCTGCTGCCACCGCTGAGCAATAACTAGCATAACCCCTTG  
GGCCTCTAAACGGGCTTTGAGGGTTTTTTGCTGAAAGGAGGAACATATGCGCTCATAACGATATGAACGTTGAGA  
CTGCCGCTGAGTTATCAGCTGTGAACGACATTCTGGCGTCTATCGGTGAACCTCCGGTATCAACGCTGGAAGGTGAC  
GCTAACGCAGATGCAGCGAACGCTCGGCGTATTCTCAACAAGATTAACCGACAGATTCAATCTCGTGGATGGACGTT  
CAACATTGAGGAAGGCATAACGCTACTACCTGATGTTTACTCCAACCTGATTGTATACAGTGACGACTATTTATCCC  
TAATGTCTACTTCCGGTCAATCCATCTACGTTAACCGAGGTGGCTATGTGTATGACCGAACGAGTCAATCAGACCGC  
TTTGACTCTGGTATTACTGTGAACATTATTCGTCTCCGCGACTACGATGAGATGCCTGAGTGTCTCCGTTACTGGAT  
TGTCACCAAGGCTTCCCGTCAGTTCAACAACCGATTCTTTGGGGCACCGGAAGTAGAGGGTGTACTCCAAGAAGAGG  
AAGATGAGGCTAGACGCTCTGTCATGGAGTATGAGATGGACTACGGTGGGTACAATATGCTGGATGGAGATGCGTTC  
ACTTCTGGTCTACTGACTCGCTAACATTAATAAATAAGGAGGCTCTAATGGCACTCATTAGCCAATCAATCAAGAAC  
TTGAAGGGTGGTATCAGCCAACAGCCTGACATCCTTCGTTATCCAGACCAAGGGTCACGCCAAGTTAACGTTGGTC  
TTCGGAGACCGAGGGCCTCCAAAAGCGTCCACCTCTTGTTCCTTAAATACACTTGGAGACAACGGTGCCTTAGGTC  
AAGTCCGTACATCCACCTGATTAACCGAGATGAGCACGAACAGTATTACGCTGTGTTCACTGGTAGCGGAATCCGA  
GTGTTCCGACCTTTCTGGTAACGAGAAGCAAGTTAGGTATCCTAACGGTTCCAACTACATCAAGACCGCTAATCCACG  
TAACGACCTGCGAATGGTTACTGTAGCAGACTATACGTTTCATCGTTAACCGTAACGTTGTTGCACAGAAGAACACAA  
AGTCTGTCAACTTACCGAATTACAACCCTAATCAAGACGGATTGATTAACGTTTCGTGGTGGTCAGTATGGTAGGGAA  
CTAATTGTACACATTAACGGTAAAGACGTTGCGAAGTATAAGATACCAGATGGTAGTCAACCTGAACACGTAAACAA  
TACGGATGCCCAATGGTTAGCTGAAGAGTTAGCCAAGCAGATGCGCACTAACTTGTCTGATTGGACTGTAAATGTAG  
GGCAAGGGTTCATCCATGTGACCGCACCTAGTGGTCAACAGATTGACTCCTTCCAGACTAAAGATGGCTACGCAGAC  
CAGTTGATTAACCTGTGACCCACTACGCTCAGTCGTTCTCTAAGCTGCCACCTAATGCTCCTAACGGTACATGGT  
GAAAATCGTAGGGGACGCCTCTAAGTCTGCCGACCAGTATTACGTTTCGGTATGACGCTGAGCGGAAAGTTTGGACTG  
AGACTTTAGGTTGGAACACTGAGGACCAAGTTCTATGGGAAACCATGCCACACGCTCTTGTGCGAGCCGCTGACGGT  
AATTTCCGACTTCAAGTGGCTTGAGTGGTCTCCTAAGTCTTGTGGTGACGTTGACACCAACCCTTGGCCTTCTTTTGT  
TGTTTCAAGTATTAACGATGTGTTCTTCTTCCGTAACCGCTTAGGATTCTTAGTGGGGAGAACATCATATTGAGTC  
GTACAGCCAAATACTTCAACTTCTACCCTGCGTCCATTGCGAACCTTAGTGATGACGACCCTATAGACGTAGCTGTG  
AGTACCAACCGAATAGCAATCCTTAAGTACGCCGTTCCGTTCTCAGAAGAGTTACTCATCTGGTCCGATGAAGCACA  
ATTCGTCCTGACTGCCTCGGGTACTCTCACATCTAAGTCGGTTGAGTTGAACCTAACGACCCAGTTTGACGTACAGG  
ACCGAGCGAGACCTTTTGGGATTGGGCGTAATGTCTACTTTGCTAGTCCGAGGTCCAGCTTCCAGTCCATCCACAGG  
TACTACGCTGTGCAGGATGTGAGTTCCGTTAAGAATGCTGAGGACATTACATCACACGTTCCCTAACTACATCCCTAA  
TGGTGTGTTTCAAGTATTTGCGGAAGTGGTACGGAAAACCTTCTGTTTCGGTACTATCTCACGGGGACCCTAGTAAAATCT  
TCATGTACAAATTCCTGTACCTGAACGAAGAGTTAAGGCAACAGTTCGTTGGTCTCATTGGGACTTTGGGGAAAACGTA  
CAGGTTCTAGCTTGTGAGATATCAGCTCAGATATGTATGTGATTCTTCGCAATGAGTTCAATACGTTCCCTAGCTAG  
AATCTCTTTCACTAAGAACGCCATTGACTTACAGGGAGAACCCTATCGTGCCTTTATGGACATGAAGATTCGATACA  
CGATTCCCTAGTGGAAACATAACAACGATGACACATTCACTACCTCTATTTCATATTTCCAACAATTTATGGTGCAAACCTC  
GGGAGGGGGCAAAATCACTGTATTGGAGCCTGATGGTAAGATAACCGTGTTCGAGCAACCTACGGCTGGGTGGAATAG  
CGACCTTGGCTGAGACTCAGCGGTAACCTTGGAGGACGCACTGGTGTACATTGGGTTCAACATTAACCTCGTATATG  
AGTTCTCTAAGTTCCCTCATCAAGCAGACTGCCGACGACGGGTCTACCTCCACGGAAGACATTTGGGCGCTTACAGTTA  
CGCCGAGCGTGGGTTAACTACGAGAACTCTGGTACGTTTACATTTATGTTGAGAACCAATCGTCTAACTGGAAGTA  
CACAATGGCTGGTGCCCGATTAGGCTCTAACACTCTGAGGGCTGGGAGACTGAACTTAGGGACCGGACAATATCGAT  
TCCCTGTGGTTGGTAACGCCAAGTTCAACACTGTATACATCTTGTGAGATGAGACTACCCCTCTGAACATCATTGGG  
TGTGGCTGGGAAGGTAACACTTACGGAGAAGTTCCGGTATTTAATTAATATTCTCCCTGTGGTGGCTCGAAATTA  
ATACGACTCACTATAGGGAGAACAATACGACTACGGGAGGGTTTTCTTATGATGACTATAAGACCTACTAAAAGTAC  
AGACTTTGAGGTATTCCTCCGGCTCACCATGACATTCTTGAAGCTAAGGCTGCTGGTATTGAGCCGAGTTTCCCTG  
ATGCTTCCGAGTGTGTACGTTGAGCCTCTATGGGTTCCCTCTAGCTATCGGTGGTAACTGCGGGGACCAGTGTGG  
TTCGTTACGAGCGACCAAGTGTGGCGACTTAGTGGAAAGGCTAAGCGAAAGTTCCGTAAGTTAATCATGGAGTATCG  
CGATAAGATGCTTGAAGATGATACTCTTTGGAATTACGATGGGTAGGCAATACGTTCCACATTCGTTTCCCTCA  
AGACTATCGGTGCGGTATTCCATGAAGAGTACACACGAGATGGTCAATTTTCAATCAGCAAGGAGGA

TAACCATATGTGTTGGGCAGCCGCAATACCTATCGCTATATCTGGCGCTCAGGCTATCAGTGGTCAGAACGCTCAGG  
CCAAAATGATTGCCGCTCAGACCGCTGCTGGTCGTCGTCGAAGCTATGGAAATCATGAGGCAGACGAACATCCAGAAT  
GCTGACCTATCGTTGCAAGCTCGAAGTAACTTGAGGAAGCGTCCGCCGAGTTGACCTCACAGAACATGCAGAAGGT  
CCAAGCTATTGGGTCTATCCGAGCGGCTATCGGAGAGAGTATGCTTGAAGGTTCCCTCAATGGACCGCATTAAAGCGAG  
TCACAGAAGGACAGTTTCAATTCGGGAAGCCAATATGGTAACTGAGAACTATCGCCGTGACTACCAAGCAATCTTCGCA  
CAGCAACTTGGTGGTACTCAAAGTGCTGCAAGTCAGATTGACGAAATCTATAAGAGCGAACAGAAACAGAAGAGTAA  
GCTACAGATGGTTCTGGACCCACTGGCTATCATGGGGTCTTCCGCTGCGAGTGCTTACGCATCCGGTGCGTTCGACT  
CTAAGTCCACAATAAGGCACCTATTGTTGCCGCTAAAGGAACCAAGACGGGGAGGTAATGAGCTATGAGTAAAATT  
GAATCTGCCCTTCAAGCGGCACAACCGGGACTCTCTCGGTTACGTGGTGGTGTGGAGGTATGGGCTATCGTGCAGC  
AACCCTCAGGCCGAACAGCAAGGTCAAGCTATTGGACACCATTGGTTCGGTTCGCTAAGGCTGGTGCCGATATGT  
ATACCGCTAAGGAACAACAGCAGCAGACCTAGTGTATGAACGCTCTAACGAGATTATCCGTAAGCTGACCCCTGAG  
CAACGTCGAGAAGCTCTCAACAACGGGACCCCTTCTGTATCAGGATGACCCATACGCTATGGAAGCACTCCGAGTCAA  
GACTGGTCGTAACGCTGCGTATCTTGTGGACGATGACGTTATGCAGAAGATAAAAAGAGGGTGTCTTCCGTAICTCGCG  
AAGAGATGGAAGAGTATCGCCATAGTCGCTTCAAGAGGGCGCTAAGGTATACGCTGAGCAGTTCGGCATCGACCCCT  
GAGGACGTTGATTATCAGCGTGGTTTTCAACGGGGACATTACCGAGCGTAACATCTCGCTGTATGGTGCGCATGATAA  
CTTCTTGAGCCAGCAAGCTCAGAAGGGCGCTATCATGAACAGCCGAGTGGAACTCAACGGTGTCTTCAAGACCCTG  
ATATGCTGCGTCGTCAGACTCTGCTGACTTCTTTGAGAAGTATATCGACAACGGTCTGGTTACTGGCGCAATCCCA  
TCTGATGCTCAAGCCACACAGCTTATAAGCCAAGCGTTCAGTGACGCTTCTAGCCGTGCTGGTGGTGTGACTTCCCT  
GATGCGAGTCCGTGACAAGAAGGTAACACTTAACGGAGCCACTACGACTTACCGAGAGTTGATTGGTGAGGAACAGT  
GGAACGCTCTCATGGTCACAGCACAACGTTCTCAGTTTTGAGACTGACGCGAAGCTGAACGAGCAGTATCGCTTGAAG  
ATTAAGTCTGCGCTGAACCAAGAGGACCCAAGGACAGCTTGGGAGATGCTTCAAGGTATCAAGGCTGAACTAGATAA  
GGTCCAACCTGATGAGCAGATGACACCACAACGTGAGTGGCTAATCTCCGCACAGGAACAAGTTCAGAATCAGATGA  
ACGCATGGACGAAAGCTCAGGCCAAGGCTCTGGACGATTCCATGAAGTCAATGAACAAACTTGACGTAATCGACAAG  
CAATTCCAGAAGCGAATCAACGGTGAGTGGGTCTCAACGGATTTTAAAGGATATGCCAGTCAACGAGAACACTGGTGA  
GTTCAAGCATAGCGATATGGTTAACTACGCCAATAAGAAGCTCGCTGAGATTGACAGTATGGACATTCCAGACGGTG  
CCAAGGATGCTATGAAGTTGAAGTACCTTCAAGCGGACTCTAAGGACGGGAGCATTCCGTACAGCCATCGGAACCATG  
GTCACTGACGCTGGTCAAGAGTGGTCTGCCGCTGTGATTAACGGTAAGTTACCAGAACGAACCCAGCTATGGATGC  
TCTGCGCAGAATCCGCAATGCTGACCCCTCAGTTGATTGCTGCGCTATACCCAGACCAAGCTGAGCTATTCTGTACGA  
TGGACATGATGGACAAGCAGGGTATTGACCCCTCAGTTATTCTTGTATGCCGACCGACTGACTGTTAAGCGGTCCAAA  
GAGCAACGCTTTGAGGATGATAAAGCATTCCAGTCTGCATGAATGCATCTAAGGCTCCTGAGATTGCCCGTATGCC  
AGCGTCACTGCGCGAATCTGCACGTAAGATTTATGACTCCGTTAAGTATCGCTCGGGGAACGAAAGCATGGCTATGG  
AGCAGATGACCAAGTTCCTTAAAGGAATCTACCTACACGTTCACTGGTGATGATGTTGACGGTGATACCGTTGGTGTG  
ATTCTTAAAGATATGATGCAGGTTAACTCTGACCCGAAATCATGGGAGCAAGGTCCGGATATTCTGGAGGAAGCACG  
TAAGGGAATCATTGCGAGCAACCCTTGGATAACCAATAAGCAACTGACCATGTATTCTCAAGGTGACTCCATTTACC  
TTATGGACACCACAGGTCAAGTCAGAGTCCGATACGACAAAGAGTTACTCTCGAAGGTCTGGAGTGAGAACCAGAAG  
AAACTCGAAGAGAAAGCTCGTGAGAAGGCTCTGGCTGATGTGAACAAGCGAGCACCTATAGTTGCCGCTACGAAGGC  
CCGTGAAGCTGCTGCTAAACGAGTCCGAGAGAAACGTAACAGACTCCTAAGTTCATCTACGGACGTAAGGAGTAAC  
TAAAGGCTACATAAGGAGGCCCTAAATGGATAAGTACGATAAGAACGTACCAAGTGATTATGATGGTCTGTTCCAAA  
AGGCTGCTGATGCCAACGGGGTCTCTTATGACCTTTTACGTAAAGTTCGCTTGGACAGAATCACGATTTGTGCCTACA  
GCAAAATCTAAGACTGGACCATTAGGCATGATGCAATTTACCAAGGCAACCGCTAAGGCCCTCGGTCTGCGAGTTAC  
CGATGGTCCAGACGACGACCGACTGAACCCTGAGTTAGCTATTAATGCTGCCGCTAAGCAACTTGCAGGTCTGGTAG  
GGAAGTTTGTATGGCGATGAACTCAAAGCTGCCCTTGCCTACAACCAAGGCGAGGGACGCTTGGGTAATCCACAACCT  
GAGGCGTACTCTAAGGGGAGACTTTCGCATCAATCTCTGAGGAGGGACGTAACCTACATGCGTAACCTTCTGGATGTTGC  
TAAGTCACCTATGGCTGGACAGTTGGAACTTTTGGTGGCATAACCCCAAAGGGTAAAGGCATTCCGGCTGAGGTAG  
GATTGGCTGGAATTGGTCACAAGCAGAAAAGTAACACAGGAACCTTCTGAGTCCACAAGTTTTGCAGTTAAGGGTATC  
GAACAGGAGGCTACGGCGAAACCAATTCGCCAAGGACTTTTGGGAGACCCACGGAGAAACACTTGACGAGTACAACAG  
TCGTTCAACCTTCTTCGGATTCAAAAATGCTGCCGAAGCTGAACTCTCAACTCAGTCGCTGGGATGGCTTTCCGTG  
CTGGTCTGCTCGATAATGGTTTTGATGTGTTTTAAAGACACCATTACGCCGACTCGCTGGAACCTCTCACATCTGGACT  
CCAGAGGAGTTAGAGAAGATTGCAACAGAGGTTAAGAACCCTGCGTACATCAACGTTGTAAGTGGTGGTTCCCTGA  
GAACCTCGATGACCTCATTAAATTGGCTAACGAGAACTTTGAGAATGACTCCCGCGCTGCCGAGGCTGGCCTAGGTG  
CCAAACTGAGTGCTGGTATTATTGGTGTGGTGTGGACCCGCTTAGCTATGTTTCTATGGTCCGTGCTACTGGTAAG  
GGCTTTAAGTTAATCAATAAGGCTCTTGTAGTTGGTGCCGAAAGTGCTGCTCTGAACGTTGCATCCGAAGGTCTCCG  
TACCTCCGTAGCTGGTGGTGACGCAGACTATGCCGGTGCTGCCTTAGGTGGCTTTGTGTTTGGCGCAGGCATGTCTG  
CAATCAGTGACGCTGTAGCTGCTGGACTGAAACGCAGTAAACCAGAAGCTGAGTTCGACAATGAGTTCATCGGTCTCT  
ATGATGCGATTGGAAGCCCGTGAGACAGCACGAAACGCCAACTCTGCGGACCTCTCTCGGATGAACACTGAGAACAT  
GAAGTTTGAAGGTGAACATAATGGTGTCCCTTATGAGGACTTACCAACAGAGAGAGGTGCCGTGGTGTACATGATG  
GCTCCGTTCTAAGTGCAAGCAACCCAATCAACCCTAAGACTCTAAAAGAGTTCTCCGAGGTTGACCCCTGAGAAGGCT

GC GCGAGGAATCAA AACTGGCTGGGTT CACCGAGATTGGCTTGAAGACCTTGGGGTCTGACGATGCTGACATCCGTAG  
AGTGGCTATCGACCTCGTTTCGCTCTCCTACTGGTATGCAGTCTGGTGCCTCAGGTAAGTTCGGTGCAACAGCTTCTG  
ACATCCATGAGAGACTTCATGGTACTGACCAGCGTACTTATAATGACTTGTACAAAGCAATGTCTGACGCTATGAAA  
GACCCTGAGTTCTCTACTGGCGGCGCTAAGATGTCCCGTGAAGAAACTCGATACACTATCTACCGTAGAGCGGCACT  
AGCTATTGAGCGTCCAGA AACTACAGAAGGCACTCACTCCGTCTGAGAGAATCGTTATGGACATCATTAAGCGTCACT  
TTGACACCAAGCGTGA AACTTATGGAAAACCCAGCAATATTCGGTAACACAAAGGCTGTGAGTATCTTCCCTGAGAGT  
CGCCACAAAGGTA CTTACGTTCCCTCACGTATATGACCGTCATGCCAAGGCGCTGATGATTC AACGCTACGGTGCCGA  
AGGTTTGCAGGAAGGGATTGCCCGCTCATGGATGAACAGCTACGTCTCCAGACCTGAGGTCAAGGCCAGAGTCGATG  
AGATGCTTAAGGAATTACACGGGGTGAAGGAAGTAACACCAGAGATGGTAGAGAAGTACGCTATGGATAAGGCTTAT  
GGTATCTCCC ACTCAGACCAGTTCAACACAGTTCATAATAGAAGAGAACATTGAGGGCTTAGTAGGTATCGAGAA  
TAACTCATTCTT GAGGCACGTA AACTTGTTTGATTCCGACCTATCCATCACTATGCCAGACGGACAGCAATTCTCAG  
TGAATGACCTAAGGGACTTCGATATGTTCCGCATCATGCCAGCGTATGACCGCCGTGTCAATGGTGACATCGCCATC  
ATGGGGTCTACTGGTAAAACCACTAAGGAACTTAAGGATGAGATTTTGGCTCTCAAAGCGAAAGCTGAGGGAGACGG  
TAAGAAGACTGGCGAGGTACATGCTTTAATGGATAACCGTTAAGATTCTTACTGGTCTGCTAGACGCAATCAGGACA  
CTGTGTGGGAAACCTCACTGCGTGCCATCAATGACCTAGGGTTCTTCGCTAAGAACGCCTACATGGGTGCTCAGAAC  
ATTACGGAGATTGCTGGGATGATTGTC ACTGGTAACGTTCTGCTCTAGGGCATGGTATCCCAATTCTGCGTGATAC  
ACTCTACAAGTCTAAACCAGTTTCAGCTAAGGAACTCAAGGAACTCCATGCGTCTCTGTTCCGGAAGGAGGTGGACC  
AGTTGATTCCGGCCTAAACGTGCTGACATTGTGCAGCGCCTAAGGGAAGCAACTGATACCGGACCTGCCGTGGCGAAC  
ATCGTAGGGACCTTGAAGTATTCAACACAGGAACTGGCTGCTCGCTCTCCGTGGACTAAGCTACTGAACGGAACCAC  
TAACTACCTTCTGGATGCTGCGCGTCAAGGTATGCTTGGGGATGTTATTAGTGCCACCCTAACAGGTAAGACTACCC  
GCTGGGAGAAAGAAGGCTTCTTTCGTGGTGCCTCCGTA AACTCCTGAGCAGATGGCTGGCATCAAGTCTCTCATCAAG  
GAACATATGGTACGCGGTGAGGACGGGAAGTTTACC GTTAAGGACAAGCAAGCGTTCTCTATGGACCCACGGGCTAT  
GGACTTATGGAGACTGGCTGACAAGGTAGCTGATGAGGCAATGCTGCGTCCACATAAGGTGTCTTTACAGGATTCCC  
ATGCGTTCCGGAGCACTAGGTAAGATGGTTATGCAGTTTAAAGTCTTTCACTATCAAGTCCCTTAACTCTAAGTTCCCTG  
CGAACCTTCTATGATGGATACAAGAACAACCGAGCGATTGACGCTGCGCTGAGCATCATCACCTCTATGGGTCTCGC  
TGGTGGTTTTCTATGCTATGGCTGCACACGTCAAAGCATAACGCTCTGCCTAAGGAGAAACGTAAGGAGTACTTGGAGC  
GTGCACTGGACCCAACCATGATTGCCACGCTGCGTTATCTCGTAGTTCTCAATTGGGTGCTCCTTTGGCTATGGTT  
GACCTAGTTGGTGGTGTTTTAGGGTTCGAGTCTCCTCAAGATGGCTCGCTCTACGATTCTACCTAAGGACACCGTGAA  
GGAACGTGACCCAACAACCAACCTACACCTCTAGAGAGGTAATGGGCGCTATGGGTTCAAACCTTCTGGAACAGATGC  
CTTCCGGCTGGCTTTGTGGCTAACGTAGGGGCTACCTTAATGAATGCTGCTGGCGTGGTCAACTCACCTAATAAAGCA  
ACCGAGCAGGACTTCATGACTGGTCTTATGAACTCCACAAAAGAGTTAGTACC GAACGACCCATTGACTCAACAGCT  
TGTGTTGAAGATTTATGAGGCGAACGGTGTTAACTT GAGGGAGCGTAGGAAATAATACGACTCACTATAGGGAGAGG  
CGAAATAATCTTCTCCCTGTAGTCTCTTAGATTTACTTTAAGGAGGTCAAATGGCTAACGTAATTA AAAACCGTTTTG  
ACTTACCAGTTAGATGGCTCCAATCGTGATTTTAAATATCCCGTTTTGAGTATCTAGCCCCTAAGTTCTGATGTTAAC  
TCTTATTGGTGTAGACCGAAAGGTCCTTACGATTAATACAGACTATCGCTTTGCTACACGTA CTA CTA TCTCTGA  
CAAAGGCTTGGGGTCCAGCCGATGGCTACACGACCATCGAGTTACGTGAGTAACCTCCACTACCGACCGATTGGTT  
GACTTTACGGATGGTTCAATCCTCCGCGCGTATGACCTTAAACGTGCTCAGATTCAAACGATGCACGTAGCGGAAGA  
GGCCCGTGACCTCACTACGGATACTATCGGTGTCAATAACGATGGTCACTTGGATGCTCGTGGTCTCGAATTGTGA  
ACCTAGCGAACCGCGTGGATGACCGCGATGCTGTTCCGTTTTGGTCAACTAAAGACCATGAACCAGA AACTCATGGCAA  
GCACGTAATGAAGCCTTACAGTTCCGTAATGAGGCTGAGACTTT CAGAAACCAAGCGGAGGGCTTTAAGAACGAGTC  
CAGTACCAACGCTACGAACACAAAGCAGTGGCGCGATGAGACCAAGGGTTTCCGAGACGAAGCCAAGCGGTTCAAGA  
ATACGGCTGGTCAATACGCTACATCTGCTGGGAACTCTGCTTCCGCTGCGCATCAATCTGAGGTA AACGCTGAGAAC  
TCTGCCACAGCATCCGCTAACTCTGCTCATTGGCAGAACAGCAAGCAGACCGTGC GGAACGTGAGGCAGACAAGCT  
GGAAAATTACAATGGATTGGCTGGTGCAATTGATAAGGTAGATGGAACCAATGTGTACTGGAAAGGAAATATTCACG  
CTAACGGGCGCCTTTACATGACCACAAACGGTTTTGACTGTGGCCAGTATCAACAGTTC TTTGGTGGTGTCACTAAT  
CGTTACTCTGTCAATGGAGTGGGGAGATGAGAACGGATGGCTGATGTATGTTCAACGTAGAGAGTGGACAACAGCGAT  
AGGCGGTAACATCCAGTTAGTAGTAAACGGACAGATCATCACCAAGGTGGAGCCATGACCGGT CAGCTAAAATTGC  
AGAATGGGCATGTTCTTCAATTAGAGTCCGCATCCGACAAGGCGCACTATATTCTATCTAAAGATGGTAACAGGAAT  
AACTGGTACATTGGTAGAGGGTCAGATAACAACAATGACTGTACCTTCCACTCCTATGTACATGGTACGACCTTAAC  
ACTCAAGCAGGACTATGCAGTAGTTAACA AACTTCCACGTAGGT CAGGCCGTTGTGGCCACTGATGGTAATATTC  
AAGGTACTAAGTGGGGAGGTA AATGGCTGGATGCTTACCTACGTGACAGCTTCGTTGCGAAGTCCAAGGCGTGGACT  
CAGGTGTGGTCTGGTAGTCTGGCGGTGGGGTAAGTGTGACTGTTTTACAGGATCTCCGCTTCCGCAATATCTGGAT  
TAAGTGTGCCAACAACTCTTGGAACTTCTTCCGTA CTTGGCCCCGATGGAATCTACTTCATAGCCTCTGATGGTGGAT  
GGTTACGATTCCAAATACACTCCAACGGTCTCGGATTCAAGAATATTGCAGACAGTCGTT CAGTACCTAATGCAATC  
ATGGTGGAGAACGAGTAATTGGTAAATCACAAGGAAAGACGTGTAGTCCACGGATGGACTCTCAAGGAGGTACAAGG  
TGCTATCATTAGACTTTAACAACGAATTGATTAAGGCTGCTCCAATTGTTGGGACGGGTGTAGCAGATGTTAGTGCT  
CGACTGTTCTTTGGGTTAAGCCTTAACGAATGGTTCTACGTTGCTGCTATCGCCTACACAGTGGTT CAGATTGGTGC

CAAGGTAGTCGATAAGATGATTGACTGGAAGAAAGCCAATAAGGAGTGATATGTATGGAAAAGGATAAGAGCCTTAT  
TACATTCTTAGAGATGTTGGACACTGCGATGGCTCAGCGTATGCTTGC GGACCTTTTCGGACCATGAGCGTCGCTCTC  
CGCAACTCTATAATGCTATTAACAAACTGTTAGACCGCCACAAGTTCAGATTGGTAAGTTGCAGCCGGATGTTTAC  
ATCTTAGGTGGCCTTGCTGGTGTCTTTGAAGAGTACAAAGAGAAAAGTCGGTGATAACGGTCTTACGGATGATGATAT  
TTACACATTACAGTGATATACTCAAGGCCACTACAGATAGTGGTCTTTATGGATGTCATTGTCTATACGAGATGCTC  
CTACGTGAAATCTGAAAGTTAACGGGAGGCATTATGCTAGAATTTTTACGTAAGCTAATCCCTTGGGTTCTCGCTGG  
GATGCTATTCGGGTTAGGATGGCATCTAGGGTCAGACTCAATGGACGCTAAATGGAAACAGGAGGTACACAATGAGT  
ACGTTAAGAGAGTTGAGGCTGCGAAGAGCACTCAAAGAGCAATCGATGCGGTATCTGCTAAGTATCAAGAAGACCTT  
GCCGCGCTGGAAGGGAGCACTGATAGGATTATTTCTGATTTGCGTAGCGACAATAAGCGGTTGCGCGTCAGAGTCAA  
AACTACCGGAACCTCCGATGGTCAGTGTGGATTTCGAGCCTGATGGTCGAGCCGAACCTTGACAGCCGAGATGCTAAAC  
GTATTTCTCGCAGTACCCAGAAGGGTGACGCATGGATTTCGTGCGTTACAGGATACTATTCGTGAACCTGCAACGTAAG  
TAGGAAATCAAGTAAGGAGGCAATGTGTCTACTCAATCCAATCGTAATGCGCTCGTAGTGGCGCAACTGAAAGGAGA  
CTTCGTGGCGTTCTATTTCGTCTTATGGAAGGCGCTAAACCTACCGGTGCCACTAAGTGTGAGATTGACATGGCTA  
AGGTGCTGGCGAATGGAGACAACAAGAAGTTCATCTTACAGGCTTTCCGTGGTATCGGTAAGTCGTTTATCACATGT  
GCGTTGCTTGTGTGGTCTTATGGAGAGACCCTCAGTTGAAGATACTTATCGTATCAGCCTCTAAGGAGCGTGCAGA  
CGCTAACTCCATCTTTATTAAGAACATCATTGACCTGCTGCCATTCTTATCTGAGTTAAAGCCAAGACCCGGACAGC  
GTGACTCGGTAATCAGCTTTGATGTAGGCCAGCCAATCTGACCACTCTCCTAGTGTGAAATCAGTAGGTATCACT  
GGTCAGTTAACTGGTAGCCGTGCTGACATTATCATTGCGGATGACGTTGAGATTCCGTCTAACAGCGCAACTATGGG  
TGCCCGTGAGAAGCTATGGACTCTGGTTCAGGAGTTCGCTGCGTTACTTAAACCGCTGCCTTCTCTCGCGTTATCT  
ACCTTGGTACACCTCAGACAGAGATGACTCTCTATAAGGAACCTTGAGGATAACCGTGGGTACACAACCATTATCTGG  
CCTGCTCTGTACCCAAGGACACGTGAAGAGAACCTCTATTACTCACAGCGTCTTGCTCCTATGTTACGCGCTGAGTA  
CGATGAGAACCCTGAGGCACTTGTGGGACTCCAACAGACCCAGTGCCTTTGACCGTGATGACCTGCGCGAGCGTG  
AGTTGGAATACGGTAAGGCTGGCTTTACGCTACAGTTCATGCTTAAACCTAACCTTAGTGATGCCGAGAAGTACCCG  
CTGAGGCTTCGTGACGCTATCGTAGCGGCCTTAGACTTAGAGAAGGCCCAATGCATTACCAGTGGCTTCCGAACCG  
TCAGAACATCATTGAGGACCTTCTAACGTTGGCCTTAAGGGTGATGACCTGCATACGTACCACGATTGTTCCAACA  
ACTCAGGTGAGTACCAACAGAAGATTCTGGTCATTGACCCTAGTGGTCGCGGTAAGGACGAAACAGGTTACGCTGTG  
CTGTACACACTGAACGGTTACATCTACCTTATGGAAGCTGGAGGTTTCCGTGATGGCTACTCCGATAAGACCCCTGA  
GTTACTCGCTAAGAAGGCCAAAGCAATGGGGAGTCCAGACGGTTGTCTACGAGAGTAACCTTCGGTGACGGTATGTTTCG  
GTAAGGTATTCAGTCTTCTTAAACACCACAACCTGTGCGATGGAAGAGATTTCGTGCCCGTGGTATGAAAGAG  
ATGCGTATTTGCGATAACCTTGGCCAGTCAATGCAGACTCACCAGCTTGTAAATTCGTGATGAGGTGATTAGGGCCGA  
CTACCAGTCCGCTCGTGACGTAGACGGTAAGCATGACGTTAAGTACTCGTTGTTCTACCAGATGACCCGTATCACTC  
GTGAGAAAGGCGCTCTGGCTCATGATGACCGATTGGATGCCCTTGCCTTAGGCATTGAGTATCTCCGTGAGTCCATG  
CAGTTGGATTCCGTTAAGGTGAGGGTGAAGTACTTGTGACTTCCCTTGAAGAACACATGATGCGTCTTACGGTTGC  
TGCTACGCATATCATTGAGATGTCTGTGGGAGGAGTTGATGTGTACTCTGAGGACGATGAGGGTTACGGTACGTCTT  
TCATTGAGTGGTGATTTATGCATTAGGACTGCATAGGGATGCACTATAGACCACGGATGGTCAGTTCCTTAAAGTTAC  
TGAAAAGACACGATAAATTAATACGACTCACTATAGGGAGAGGAGGGACGAAAGGTTACTATATAGATACTGAATGA  
ATACTTATAGAGTGCATAAAGTATGCATAATGGTGTACCTAGAGTGACCTCTAAGAATGGTGATTATATTGTATTAG  
TATCACCTTAACTTAAAGACCAACATAAAGGGAGGAGACTCATGTTCCGCTTATTGTTGAACCTACTGCGGCATAGA  
GTCACCTACCGATTTCTTGTGGTACTTTGTGCTGCCCTTGGGTACGCATCTCTTACTGGAGACCTCAGTTCAGTGA  
GTCTGTGCTTTGCTCTATACTCACTTGTAGCGATTAGGGTCTTCCCTGACCGACTGATGGCTCACCGAGGGATTGAGC  
GGTATGATTGCATCACACCCTTATCCCTATAGAGTCAAGTCCCTAAGGTATAACCCATAAAGAGCCTCTAATGGTCT  
ATCCTAAGGTCTATACTAAAGATAGGCCATCCTATCAGTGTACCTAAAGAGGGTCTTAGAGAGGGCCTATGGAGT  
TCCTATAGGGTCTTTAAATATAACATAAAATCTGAGTGACTATCTCACAGTGTACGGACCTAAAGTTCCTCCCAT  
AGGGGGTACCTAAAGCCCAGCCAATCACCTAAAGTCAACCTTCGGTTGACCTTGAAGGGTTCCTAAGGGTTGGGGAT  
GACCTTGGGTTTGTCTTTGGGTGTTACCCCATAGGGGGTACCTAAAGCCCAGCCAATCACCTAAAGTCAACCTTCG  
GTTGACCTTGAAGGGTTCCTAAGGGTGGGGATGACCTTGGGTTGTCTTTGGGTGTTTACCTTGAAGTGTCTCTCTG  
TGTCCCTATCTGTTACAGTCTCCTAAAGTATCCTCCTAAAGTCACTTCCCTAACGTCCTCCTAAAGCCAACACCTAA  
AGCCTACACCTAAAGACCCATCAAGTCAACGCCTATCTTAAAGTTTAAACATAAAGACCAGACCTAAAGACCAGACC  
TAAAGACACTACATAAAGACCAGACCTAAAGACGCCTTGTGTTAGCCATAAAGTGATAACCTTTAATCATTGTCTT  
TATTAATACAACCTACTATAAGGAGAGACAACCTTAAAGAGACTTAAAGATTAATTTAAATTTTATCAAAAAGAGTA  
TTGACTTAAAGTCTAACCTATAGGATACTTACAGCCATCGAGAGGGACACGGCGAATAGCCATCCCAATCGACACCG  
GGGTCAACCGGATAAGTAGACAGCCTGATAAGTGCACGAAAAACAGGTATTGACAACATGAAGTAACATGCAGTAA  
GATACAAATCGCTAGGTAACACTAGCAGCGTCAACCGGGCGCACAGTGCCTTCTAGGTGACTTAAAGCGCACACGGC  
ACATAAGGTGAAACAAAACGGTTGACAACATGAAGTAAACACGGTACGATGTACCACATGAAACGACAGTGAGTCAC  
CACACTGAAAGGTGATGCGGTCTAACGAAACCTGACCTAAGACGCTCTTTAACAATCTGGTAAATAGCTCTTGAGTG  
CATGACTAGCGGATAACTCAAGGGTATCGCAAGGTGCCCTTTATGATATTCACTAATAACTGCACGAGGTAACACAA  
GATGGCTATGTCTAACATGACTTACAACAACGTTTTTCGACCACGCTTACGAAATGCTGAAAGAAAACATCCGTTATG

ATGACATCCGTGACACTGATGACCTGCACGATGCTATTACATGGCTGCCGATAATGCAGTTCGGCACTACTACGCT  
GACATCTTTAGCGTAATGGCAAGTGGGGCATTGACCTTGAGTTCGAAGACTCTGGTCTGATGCCTGACACCAAGGA  
CGTAATCCGCATCCTGCAAGCGGTATCTATGAGCAATTAACGATTGACCTCTGGGAAGACGCAGAAGACTTGCTCA  
ATGAATACTTGGAGGAAGTGCAGGAGTACGAGGAGGATGAAGAGTAATGTCTACTACCAACGTGCAATACGGTCTGA  
CCGCTCAAACGTACTTTTCTATAGCGACATGGTGGCTGTGGCTTTAACTGGTCACTCGCAATGGCACAGCTCAAA  
GAACTGTACGAAAACAACAAGGCAATAGCTTTAGAATCTGCTGAGTGATAGACTCAAGGTCGCTCCTAGCGAGTGGC  
CTTTATGATTATCACTTTACTTATGAGGGAGTAATGTATATGCTTACTATCGGTCTACTCACCCTCTAGGTCTAGC  
TGTAGGTGCATCCTTTGGGAAGGCTTTAGGTGTAGCTGTAGGTTCTACTTTACCGCTTGATCATCATAGGAATCA  
TCAAAGGGGCACTACGCAAATGATGAAGCACTACGTTATGCCAATCCACACGTCCAACGGGGCAACCGTATGTACAC  
CTGATGGGTTTCGCAATGAAACAACGAATCGAACGCCTTAAGCGTGAACCTCCGATTAACCGCAAGATTAACAAGATA  
GGTTCGGCTATGACAGAACGCCTGATGGCTTAAAGAAAGGTTATATGCCAATGGCACACTATACGCTGCAAATC  
GGCGAATAGTGAACACTTGGCGAGAGAACAACCTCGAACGCCGCAAGGAACAAGAGAGGGGCGGCTGGCATGACGA  
AAGGAAAAGGTTAAAGCCAAGAAACTCGCCGCACTTGAACAGGCACTAGCCAACACACTGAACGCTATCTCATAACG  
AACATAAAGGACACAATGCAATGAACATTACCGACATCATGAACGCTATCGACGCAATCAAAGCACTGCCAATCTGT  
GAACTTGACAAGCGTCAAGGTATGCTTATCGACTTACTGGTTCGAGATGGTCAACAGCGAGACGTGTGATGGCGAGCT  
AACCGAACTAAATCAGGCACTTGGACATCAAGATTGGTGGACTACCTTGAAGTGTCTCACGGCTGACGCAGGGTTCA  
AGATGCTCGGTAATGGTCACTTCTCGGCTGCTTATAGTCAACCGCTGCTACCTAACAGAGTGATTAAGGTGGGCTTT  
AAGAAAGAGGATTACGGCGCAGCCTATACCGCATTCTGCCGCATGTATCAGGGTCGTCTGGTATCCCTAACGTCTA  
CGATGTACAGCGCCACGCTGGATGCTATACGGTGGTACTTGACGCCTTAAGGATTGCGAGCGTTTTCAACAATGATG  
CCCATTATAAATACGCTGAGATTGCAAGCGACATCATTGATTGCAATTCGGATGAGCATGATGAGTTAACTGGATGG  
GATGGTGGATTTGTTGAAACTTGTAAACTAATCCGCAAGTTCTTTGAGGGCATCGCCTCATTGACATGCATAGCGG  
GAACATCATGTTCTCAAATGGAGACGTACCATAACATCACCGACCCGGTATCATTCTCGCAGAAGAAAGACGGTGGCG  
CATTGACATCGACCTGAGGAACTCATCAAGGAAGTGCAGGAAGTGCACGACAGAAAGAAATTGACCGCGCTAAG  
GCCCGTAAAGAACGTACAGAGGGGGCGCTTAGAGGCACGCAGATTCAAACGTGCAACCGCAAGGCACGTAAAGCACA  
CAAAGCTAAGCGCGAAAGAATGCTTGCTGCGTGGCGATGGGCTGAACGTCAAGAACGGCGTAACCATGAGGTAGCTG  
TAGATGTACTAGGAAGAACAATAACGCTATGCTCTGGGTCAACATGTTCTCTGGGGACTTTAAGGGCGCTTGAGGAA  
CGAATCGCGCTGCACTGGCGTAATGCTGACCGGATGGCTATCGCTAATGGTCTTACGCTCAACATTGATAAGCAACT  
TGACGCAATGTTAATGGGCTGATAGTCTTATCTTACAGTCTATGCGGGTGGCTGAATAGGTACGATTTACTAAC  
TGGAAAGAGCACTAAATGAACACGATTAACATCGTAAGAACGACTTCTCTGACATCGAATGGCTGCTATCCCGTT  
CAACACTCTGGCTGACCATTACGGTGGCGTTTACGCTCGCAACAGTTGGCCCTTGGCATGAGTCTTACGATGG  
GTGAAGCACGCTTCCGCAAGATGTTTGGAGCGTCAACTTAAAGCTGGTGGGTTGCGGATAACGCTGCCGCCAAGCCT  
CTCATCACTACCCTACTCCCTAAGATGATTGCACGCATCAACGACTGGTTTGGAGGAAGTGAAGGCTAAGCGCGGCAA  
GCGCCCCGACAGCCTTCCAGTTCCCTGCAAGAAATCAAGCCGGAAGCCGTAGCGTACATCACCATTAAGACCACTCTGG  
CTTGCCCTAACAGTGTGACAATAACAACCGTTACGGCTGTAGCAAGCGCAATCGGTGCGGCCATTGAGGACGAGGCT  
CGCTTCCGTCGTATCCGTGACCTTGAAGCTAAGCACTTCAAGAAAAACGTTGAGGAACAACCTCAACAAGCGCGTAGG  
GCACGTCTACAAGAAAGCATTATGCAAGTTGTCGAGGCTGACATGCTCTCTAAGGGTCTACTCGGTGGCGAGGCGT  
GGTCTTCGTGGCATAAGGAAGACTCTATTGATGTAGGAGTACGCTGCATCGAGATGCTCATTGAGTCAACCGGAATG  
GTTAGCTTACACCGCCAAAATGCTGGCGTAGTAGGTCAAGACTCTGAGACTATCGAACTCGCACCTGAATACGCTGA  
GGCTATCGCAACCCGTGCAGGTGCGCTGGCTGGCATCTCTCCGATGTTCCAACCTTGGCTAGTTCCCTCCTAAGCCGT  
GGACTGGCATTACTGGTGGTGGCTATTGGGCTAACGGTCGTGCTCTGCGCTGGTGGCTACTCACAGTAAGAAA  
GCACTGATGCGCTACGAAGACGTTTACATGCCTGAGGTGTACAAAGCGATTAACATTGCGCAAAAACACCGCATGGAA  
AATCAACAAGAAAGTCTTAGCGGTGCGCAACGTAATCACCAGTGGAAAGCATTGTCCGGTTCGAGGACATCCCTGCGA  
TTGAGCGTGAAGAACTCCCGATGAAACCGGAAGACATCGACATGAATCCTGAGGCTCTCACCGCGTGGAAACGTGCT  
GCCGCTGCTGTGTACCGCAAGGACAAGGCTCGCAAGTCTCGCCGTATCAGCCTTGAGTTCATGCTTGAGCAAGCCAA  
TAAGTTTGCTAACCATAAAGGCCATCTGGTTCCCTTACAACATGGACTGGCGCGGTGCTGTTTACGCTGTGTCAATGT  
TCAACCCGCAAGGTAACGATATGACCAAAGGACTGCTTACGCTGGCGAAAGGTAACCAATCGGTAAGGAAGGTTAC  
TACTGGCTGAAAATCCACGGTGCAAACTGTGCGGGTGTGATAAGGTTCCGTTCCCTGAGCGCATCAAGTTTCAATTGA  
GGAAAACCACGAGAACATCATGGCTTGCCTAAGTCTCCACTGGAGAACAACCTTGGTGGGCTGAGCAAGATTCTCCGT  
TCTGCTTCCCTGCGTTCTGCTTTGAGTACGCTGGGGTACAGCACCACGGCCTGAGCTATAACTGCTCCCTTCCGCTG  
GCGTTTGGACGGGCTTGTCTGGCATCCAGCACTTCTCCGCGATGCTCCGAGATGAGGTAGGTGGTTCGCGCGGTTAA  
CTTGCTTCCCTAGTGAACCGTTTACGGACATCTACGGGATTGTTGCTAAGAAAGTCAACGAGATTCTACAAGCAGACG  
CAATCAATGGGACCGATAACGAAGTAGTTACCGTGACCGATGAGAACAACCTGGTGAATCTCTGAGAAAGTCAAGCTG  
GGCACTAAGGCACTGGCTGGTCAATGGCTGGCTTACGGTGTACTCGCAGTGTGACTAAGCGTTTCAAGTCAAGCTG  
GGCTTACGGGTCCAAGAGTTCCGCTTCCGTCAACAAGTGTGGAAGATAACCATTGAGCCAGCTATTGATTCCGGCA  
AGGGTCTGATGTTCACTCAGCCGAATCAGGCTGCTGGATAACATGGCTAAGCTGATTTGGGAATCTGTGAGCGTGACG  
GTGGTAGCTGCGGTTGAAGCAATGAACTGGCTTAAAGTCTGCTGCTAAGCTGCTGGCTGCTGAGGTCAAAGATAAGAA  
GACTGGAGAGATTCTTCGCAAGCGTTGCGCTGTGCATTGGGTAACCTCTGATGGTTTCCCTGTGTGGCAGGAATACA

AGAAGCCTATTCAGACGCGCTTGAACCTGATGTTCCCTCGGTGAGTTCGGCTTACAGCCTACCATTAACACCAACAAA  
GATAGCGGAGATTGATGCACACAAACAGGAGTCTGGTATCGCTCCTAACTTTGTACACAGCCAAGACGGTAGCCACCT  
TCGTAAGACTGTAGTGTGGGCACACGAGAAGTACGGAATCGAATCTTTTGCAGTATTACGACTCCTTCGGTACCA  
TTCCGGCTGACGCTGCGAACCTGTTCAAAGCAGTGCAGGAACTATGGTTGACACATATGAGTCTTGTGATGACTG  
GCTGATTTCTACGACCAGTTCGCTGACCAGTTGCACGAGTCTCAATTGGACAAAATGCCAGCACTTCCGGCTAAAGG  
TAACTTGAACCTCCGTGACATCTTAGAGTCCGACTTCGCGTTCGCGTAACGCCAAATCAATACGACTCACTATAGAG  
GGACAACTCAAGGTCATTTCGCAAGAGTGGCCTTTATGATTGACCTTCTTCCGGTTAATACGACTCACTATAGGAGA  
ACCTTAAGGTTTAACTTTAAGACCCTTAAGTGTAAATTAGAGATTTAAATTAAGAATTACTAAGAGAGGACTTTAA  
GT

>NRG-P0098

ATGCGTAACTTCGAAAAGATGACCAAACGTTCTAACCGTAATGCTCGTGACTTCGAGGCAACCAAAGGTCGCAAGTT  
GAATAAGACTAAGCGTGACCGCTCTCACAAGCGTAGCTGGGAGGGTCAGTAAGATGGGACGTTTTATATAGTGGTAAT  
CTGGCAGCATTCAAGGCAGCAACAAACAAGCTGTTCCAGTTAGACTTAGCGGTCATTTATGATGACTGGTATGATGC  
CTATAACAAGAAAAGATTGCATACGGTTACGTATTGAGGACAGGAGTGGAAACCTGATTGATACTAGCACCTTCTACC  
ACCACGACGAGGACGTTCTGTTCAATATGTGTACTGATTGGTTGAACCATATGTATGACCAGTTGAAGGACTGGAAG  
TAATACGACTCAGTATAGGGACAATGCTTAAGGTCGCTCTCTAGGAGTGGCCTTAGTCATTTAACCAATAGGAGATA  
AACATTATGATGAACATTAAGACTAACCCTGTTTAAAGCCGTGTCTTTCGTAGAGTCTGCCATTAAGAAGGCTCTGGA  
TAACGCTGGGTATCTTATCGCTGAAATCAAGTACGATGGTGTACGCGGGAACATCTGCGTAGACAATACTGCTAACA  
GTTACTGGCTCTCTCGTGTATCTAAAACGATTCCGGCACTGGAGCACTTAAACGGGTTTGATGTTGCTGGAAGCGT  
CTACTGAACGATGACCGTTGCTTCTACAAAGATGGCTTTATGCTTGATGGGGAACCTCATGGTCAAGGGCGTAGACTT  
TAACACAGGGTCCGGCCTACTGCGTACCAAATGGACTGACACGAAGAACCAAGAGTTCATGAAGAGTTATTTCGTTG  
AACCAATCCGTAAGAAAAGATAAAGTTCCTTTAAGCTGCACACTGGACACCTTCACATAAAAACGTACGCTATCCTC  
CCGCTGCACATCGTGGAGTCTGGAGAAGACTGTGATGTCATGACGTTGCTCATGCAGGAACACGTTAAGAACATGCT  
GCCTCTGCTACAGGAATACTTCCCTGAAATCGAATGGCAAGCGGCTGAATCTTACGAGGTCTACGATATGGTAGAAC  
TACAGCAACTGTACGAGCAGAAGCGGAGCAGAAGGCCATGAGGGTCTCATTGTGAAAGACCCGATGTGTATCTATAAG  
CGCGGTAAGAAAATCTGGCTGGTGGAAAATGAAACCTGAGAACGAAGCTGACGGTATCATTACGGGTCTGGTATGGGG  
TACAAAAGGCTCTGGCTAATGAAGGTAAAGTGATGGTTTTGAGGTGCTTCTTGAGAGTGGTCTGTTAGTTAACGCCA  
CGAATATCTCTCGCGCCTTAATGGATGAGTTCCTGAGACAGTAAAAGAGGGCCACCCTAAGTCAATGGGGATTCTTT  
AGCCCATACGGTATTGGCGACAACGATGCTTGTACTATTAACCTTACGATGGCTGGGCGTGTCAAATTAGCTCAT  
GGAGGAAACACCTGATGGCTCTTTGCGGCACCCATCGTTTCGTAATGTTCCGTGGCACCCGAGGACAACCCCTCAAGAGA  
AAATGTAATCACACTGGCTCACCTTCGGGTGGGCCTTTCTGCGTTTTATAAGGAGACACTTTATGTTTAAAGAAGGTTG  
GTAAATTCCTTGCGGCTTTGGCAGCTATCCTGACGCTTGCGTATATTCTTGCGGTATACCCTCAAGTAGCACTAGTA  
GTAGTTGGCGCTTGTTACTTAGCGGCAGTGTGTGCTTGCGTGTGGAGTATAGTTAACTGGTAATACGACTCACTAAA  
GGAGGTACACACCATGATGTACTTAATGCCATTACTCATCGTCATTGTAGGATGCCTTGCGCTCCACTGTAGCGATG  
ATGATATGCCAGATGGTCACGCTTAATACGACTCACTAAAGGAGACACTATATGTTTCGACTTCATTACAACAAAAG  
CGTTAAGAATTTACGGTTCGCCGTGCTGACCGTTCAATCGTATGTGCGAGCGAGCGCCGAGCTAAGATACCTCTTA  
TTGGTAACACAGTTCCTTTGGCACCGAGCGTCCACATCATTATCACCCGTGGTGACTTTGAGAAAGCAATAGACAAG  
AAACGTCGGTTCCTTAGTGTGGCAGTGACCCGCTTCCCGTTCGTCCGTCTGTTACTCAAACGAATCAAGGAGGTGTT  
CTGATGGGACTGTTAGATGGTGAAGCCTGGGAAAAAGAAAACCCGCCAGTACAAGCAACTGGGTGTATAGCTTGCTT  
AGAGAAAGATGACCGTTATCCACACACCTGTAACAAAGGAGCTAACGATATGACCGAACGTGAACAAGAGATGATCA  
TTAAGTTGATAGACAATAATGAAGGTCGCCCAGATGATTTGAATGGCTGCGGTATTCTCTGCTCCAATGTCCCTTGC  
CACCTCTGCCCGCAAATAACGATCAAAAAGATAACCTTAGGTGAAATCCGAGCGATGGACCCACGTAACCACATCT  
GAATAAACCTGAGGTAACCTCCTACAGATGACCAGCCTTCCGCTGAGACAATCGAAGGTGTCACTAAGCCTTCCCCT  
ACATGCTGTTTGACGACATTGAGGCTATCGAAGTGATTGCTCGTTCAATGACCGTTGAGCAGTTCAAGGGATACTGC  
TTCGGTAACATCTTAAAGTACAGACTACGTGCTGGTAAGAAGTCAGAGTTAGCGTACTTAGAGAAAGACCCTAGCGAA  
AGCAGACTTCTATAAAGAACCTTTGAGAAAACATAAAGGATAAATGTTATGCATAACTTCAAGTCAACCCACCTGCC  
GACAGCCTATCTGATGACTTCACATCTTGCTCAGAGTGGTGCCGAAAGATGTGGGAAGAGACATTTCGACGATGCGTA  
CATCAAGCTGTATGAACTTTGGAAATCGAGAGGTCAATGACTATGTCAAACGTAAATACAGGTTCACTTAGTGTGGA  
CAACAAGAAGTTTTGGGCTACCGTAGAGTCTCGGAGCATTCTTCGAGGTTCCAATCTACGCTGAGACCCCTAGACG  
AAGCTCTGGAGTTAGCCGAATGGCAATACGTTCCGGCTGGCTTTGAGGTTACTCGTGTGCGTCTTGTGTAGCACCG  
AAGTAATACGACTCACTATTAGGGAAGACTCCCTCTGAGAAAACCAAACGAAACCTAAAGGAGATTAACATTATGGCT  
AAGAAGATTTTACCTCTGCGCTGGGTACCGCTGAACCTTACGCTTACATCGCCAAGCCGGACTACGGCAACGAAGA  
GCGTGGCTTTGGGAACCCCTCGTGGTGTCTATAAAGTTGACCTGACTATTCCCAACAAAGACCCGCGCTGCCAGCGTA  
TGGTCGATGAAATCGTGAAGTGTACGAAGAGGCTTATGCTGCTGCCGTTGAGGAATACGAAGCTAATCCACCTGCT  
GTAGCTCGTGGTAAGAAACCGCTGAAACCGTATGAGGGTGACATGCCGTTCTTCGATAACGGTGACGGTACGACTAC  
CTTTAAGTTCAAATGCTACGCGTCTTTCCAAGACAAGAAGACCAAAGAGACCAAGCACATCAATCTGGTTGTGGTTG

ACTCAAAGGTAAGAAGATGGAAGACGTTCCGATTATCGGTGGTGGCTCTAAGCTGAAAGTTAAATATTCTCTGGTT  
CCATACAAGTGGAACTGCTGTAGGTGCGAGCGTTAAGCTGCAACTGGAATCCGTGATGCTGGTTCGAACTGGCTAC  
CTTTGGTGGCGGTGAAGACGATTGGGCTGACGAAGTTGAAGAGAACGGCTATGTTGCCTCTGGTTCTGCCAAAGCGA  
GCAAACCACGCGACGAAGAAAGCTGGGACGAAGACGACGAAGAGTCCGAGGAAGCAGACGAAGACGGAGACTTCTAA  
GTGGAAGTGCAGGAGAAAATCCTTGAGCGAATCAAGGTGACTTCCCTCTGGGTGTTGGGAGTGGCAGGGCGCTACGAA  
CAATAAAGGGTACGGGCAGGTGTGGTGCAGCAATACCGGAAAGGTTGTCTACTGTGCATCGCGTAATGTCTAATGCTC  
CGAAAGGTTCTACCGTCTGCCTCTGTGATAATCCATTATGTTGTAACCCTGAACACCTATCCATAGGAACTCCA  
AAAGAGAACTCCACTGACATGGTAAATAAGGGTCGCTCACACAAGGGGTATAAACTTTCAGACGAAGACGTAATGGC  
AATCATGGAATCCAGCGAGTCCAATGTATCCTTAGCTCGCACCTATGGTGTCTCCCAACAGACTATTTGTGATATAC  
GCAAAGGGAGGCACATGGCAGGTTACGGCGCTAAAGGAATCCGAAAGGTTGGAGCGTTTCGCTCTGGCCTAGAGGA  
CAAGGTTTCAAAGCAGTTGGAATCAAAGGTTAAATTCGAGTATGAAGAGTGGAAAGTGCCTTATGTAATTCGGG  
CGAGCAATCACACTTACACTCCAGACTTCTTACTTCCAACCGGTATATTTCGTTGAGACAAAGGGTCTGTGGGAAAGC  
GATGATAGAAAAGAAGCACTTATTAATTAGGGAGCAGCACCCCGAGCTAGACATCCGTATTGTCTTCTCAAGCTCACG  
TACTAAGTTATACAAAGGTTCTCCAACGTTCTTATGGAGAGTTCTGCGAAAAGCATGGTATTAAGTTCGCTGATAAAC  
TGATACCTGCTGAGTGGATAAAGGAACCCAAAGAAGGAGGTCCTTTGATAGATTAAAAAGGAAAGGAGGAAAGAAA  
TAATGGCTCGTGTACAGTTTAAACAACGTGAATCTACTGACGCAATCTTTGTTCACTGCTCGGCTACCAAGCCAAGT  
CAGAATGTTGGTGTCCGTGAGATTGCCAGTGGCACAAGAGCAGGGTTGGCTCGATGTGGGATAACCACTTTATCAT  
CAAGCGAGACGGTACTGTGGAGGCAGGACGAGATGAGATGGCTGTAGGCTCTCACGCTAAGGGTTACAACCACAACT  
CTATCGGCGTCTGCCTTGTGGTGGTATCGACGATAAAGGTAAGTTCGACGCTAACTTTACGCCAGCCAAATGCAA  
TCCCTTCGCTCACTGCTTGTACACTGCTGGCTAAGTACGAAGGCGCTGTGCTTCGCGCCCATCATGAGGTGGCGCC  
GAAGGCTTGCCTTCGTTGACCTTAAGCGTTGGTGGGAGAAGAACGAAGTGGTCACTTCTGACCGTGGATAATGAT  
CTATTGGAAGTCGTTGCGTGGATTTATAGAAGTAGGAGGGAATTGCATGGACAATTCGCACGATTCCGATAGTGTAT  
TTCTTTACCACATTCCTTGTGACAAGTGTGGGAGTAGTGTGGGAACTCGCTGTTCTCTGACGGACACACGTTCTGC  
TACGTATGCGAGAAGTGGACTGCTGGTAATGAAGACACTAAAGAGAGGGCTTCAAACCGGAAACCTCAGGAGGTAA  
ACCAATGACTTACAACGTGTGGAAGTTCGGGGAATCCAATGGACGCTACTCCGCGTTAACTGCGAGAGGAATCTCCA  
AGGAAACCTGTCAGAAGGCTGGCTACTGGATTGCCAAAGTAGACGGTGTGATGTACCAAGTGGCTGACTATCGGGAC  
CAGAACGGCAACATTGTGAGTCAGAAGGTTGAGATAAAGATAAAGAACTTAAAGACCACTGGTAGTCACAAGAGTGA  
CGCTCTGTTCCGGAAAGCACTTGTGGAATGGTGGTGAAGAAGATTGTCGTTACAGAAGGTGAAATCGACATGCTTACCG  
TGATGGAAGTTCAAAGACTGTAAGTATCCTGTAGTGTGTTGGGTCACGGTGCCTCTGCCGCTAAGAAGACATGCGCT  
GCCAACTACGAATACTTTGACCAGTTCGAACAGATTATCTTAATGTTGATATGGACGAAGCAGGGCGCAAAGCAGT  
CGAAGAGGCTGCACAGGTTCTACCTGCTGGTAAGGTACGAGTGGCAGTTCTTCCGTGTAAGGATGCAAACGAGTGT  
ACCTAAATGGTACGACCGTGAATCATGGAGCAAGTGTGGAATGCTGGTCTTGGATTCTGATGGTGTGGTATCG  
GCTCTTTGTTACGTGAACGAATCCGTGAGCACCTATCGTCCGAGGAATCAGTAGGTTTACTTTTTCAGTGGCTGCAC  
TGGTATCAACGATAAGACCTTAGGTGCCCGTGGTGGTGAAGTCATTATGGTCACTTCCGGTTCGGTATGGGTAAGT  
CAACGTTTCGTCCGTCAACAAGCTCTACAATGGGGCACAGCGATGGGCAAGAAGGTAGGCTTAGCGATGCTTGAGGAG  
TCCGTTGAGGAGACCGCTGAGGACCTTATAGGTCTACACAACCGTGTCCGACTGAGACAATCCGACTCACTAAAGAG  
AGAGATTATTGAGAACGGTAAGTTCGACCAATGGTTCGATGAAGTTCGCAACGATAACGTTCCATCTATATGACT  
CATTGCGCGAGGCTGAGACGGATAGACTGCTCGCTAAGCTGGCCTACATGCGCTCAGGCTTGGGCTGTGACGTAATC  
ATTCTAGACCACATCTCAATCGTGTATCCGCTTCTGGTGAATCCGATGAGCGTAAGATGATTGACAACCTGATGAC  
CAAGCTCAAAGGGTTGCTAAGTCAACTGGGGTGGTGTGGTGTGTAATTTGTCACCTTAAAGAACCAGACAAAGGTA  
AAGCACATGAGGAAGGTGCGCCCGTTTCTATTACTGACCTACGTGGTCTGGGCGCACTACGCCAACTATCTGATACT  
ATTATTGCCCTTGAGCGTAATCAGCAAGGCGATATGCCTAACCTTGTCTCTCGTTCGTATTCTCAAGTGCCTGCTTAC  
TGGTATGATACTGGTATCGCTGGCTACATGGAATACAACAAGGAAACCGGATGGCTTGAACCATCAAGTTACTCAGGGG  
AAGAAGAGTCACTCAGAGTCAACAGACTGGTCCAACGACACTGACTTCTGACAGGATTCTTGATGACTTTCCAGA  
CGACTACGAGAAGTTTCGCTGGAGAGTCCCATTCTAATACGACTCACTAAAGGAGACACACCATGTTCAAAGTGAAT  
AAGAAGTTAGGCAACTGCTGGTTCGTATGTACAACGTGGAAGCCAAGCGACTGAACGATGAGGCTCGTAAAGAGGC  
CACACAGTCAAGCGCTCTGGCGATTTCGCTCCAACGAAGTGGCTGACAGTGCATCCACTAAAGTTACCGAGGCTGCC  
GTGTGGCAAACCAAGCTCAACAGCTTTCCAATCTTTGAGTAATCAAACAGGAGAAACCATTATGTCTAACGTAGC  
TGAAACTATCCGTCTATCCGATACAGCTGACCAGTGGAAACCGTCCGAGTCCACATCAACGTTTCGCAACGGTAAGGCGA  
CTATGGTTTACCCTGGAAGGACTCTAAGTCTCTAAGAATCACACTCAGCGTATGACGTTGACAGATGAGCAAGCA  
CTGCGTCTGGTCAATGCGCTTACCAAAGCTGCCGTGACAGCAATTCATGAAGCTGGTTCGCGTCAATGAAGCTATGGC  
TATCCTCGACAAGATTGATAACTAAGAGTGGTATCCTCAAGGTCGCCAAAGTGGTGGCCTTCATGAATACTATTCTGA  
CTCACTATAGGAGATATTACCATGCGTGACCCTAAAGTTATCCAAGCAGAAATCGCTAAACTGGAAGCTGAACTGGA  
GGACGTTAAGTACCATGAAGCTAAGACTCGCTCCGCTGTTACATCTTGAAGAAGTGGTGGACTTGGACAAGAC  
AGACTGGCTGGAAGAAACCAGAAGTTACCAAGCTGAGTCATAAGGTGTTTCGATAAGGACACTATGACCCACATCAAG  
GCTGGTGAATGGGTTAAGGTTGACATGGGAGTTGTTGGTGGATACGGCTACGTCCGCTCAGTTAGTGGCAAATATGC  
ACAAGTGTACATACATCACAGGTGTTACTCCACGCGGTGCAATCGTTGCCGATAAGACCAACATGATTACACAGGTT

TCTTGACAGTTGTTTCATATGAAGAGATTGTTAAGTCACGATAATCAATAGGAGAAATCAATATGATCGTTTTCTGAC  
ATCGAAGCTAACGCCCTCTTAGAGAGCGTCACTAAGTTCCACTGCGGGTTATCTACGACTACTCCACCGCTGAGTA  
CGTAAGCTACCGTCCGAGTGACTTCGGTGCATCTGGATGCGCTGGAAGCCGAGGTTGCACGAGGCGGTCTTATTG  
TGTTCCACAACGGTCACAAGTATGACGTTCCCTGCATTGACCAAATGGCAAAGTTGCAATTGAACCGAGAGTTCCAC  
CTTCCTCGTGAGAAGTGTATTGACACCCTTGTGTTGTCACGTTTGATTCAATCCAACCTCAAGGACACCGATATGGG  
TCTTCTGCGTTCCGGCAAGTTGCCCGGAAAACGCTTTGGGTCTCACGCTTTGGAGGCGTGGGGTTATCGCTTAGGCG  
AGATGAAGGGTGAATACAAAGACGACTTTAAGCGTATGCTTGAAGAGCAGGGTGAAGAATACGTTGACGGAATGGAG  
TGGTGGAACTTCAACGAAGAGATGATGGACTATAACGTTTACGGACGTTGTGGTAACTAAAGCTCTCCTTGAGAAGCT  
ACTCTCTGACAAACATTACTTCCCTCCTGAGATTGACTTTACGGACGTAGGATACACTACGTTCTGGTCAGAATCCC  
TTGAGGCCGTTGACATTGAACATCGTGCATGGCTGCCTCGCTAAACAAGAGCGCAACGGGTTCCCGTTTGACACA  
AAAGCAATCGAAGATTGTACGTAGAGTTAGCTGCTCGCCGCTCTGAGTTGCTCCGTAATTTGACCGAAACGTTCCGG  
CTCGTGGTATCAGCCTAAAGGTGGCACTGAGATGTTCTGCCATCCGCGAACAGGTAAGCCACTACCTAAATACCCTC  
GCATTAAGACACCTAAAGTTGGTGGTATCTTTAAGAAGCCTAAGAACAAGGCACAGCGAGAAGGCCGTTGAGCCTTGC  
GAACTTGATACCCGCGAGTACGTTGCTGGTGCCTTACACCCAGTTGAACATGTTGTGTTTAAACCTTCGTCTCG  
TGACCACATTCAGAAGAACTCCAAGAGGCTGGGTGGGTCCCAGCAAGTACACCGATAAGGGTGCCTGTGGTGG  
ACGATGAGGTACTCGAAGGAGTACGTGTAGATGACCCTGAGAAGCAAGCCGCTATCGACCTCATTAAAGAGTACTTG  
ATGATTCAGAAGCGAATCGGACAGTCTGCTGAGGGAGACAAAGCATGGCTTCGTTATGTTGCTGAGGATGGTAAGAT  
TCATGGTTCTGTTAACCCTAATGGAGCAGTTACGGGTCGTGCGACCCATGCGTTCCCAAACCTTGCGCAAATCCGG  
GTGTACGTTCTCCTTATGGAGAGCAGTGTGCGCTGCTTTTGGCGCTGAGCACCATTTGGATGGGATAACTGGTAAG  
CCTTGGGTTTACGGCTGGCCTCGACGCATCCGGTCTTGGACTACGCTGCTTGGCTCACTTTCATGGCTCGCTTTGATA  
CGGCGAGTACGCTCACGAGATTCTTAACGGCGACATCCACACTAAGAACCAGATAGCTGCTGAACTACCTACCCGAG  
ATAACGCTAAGACGTTTATCTATGGGTTCCCTATGGTGCCTGGTATGAGAAGATTGGACAGATTGTTGGTGCCTGGT  
AAAGAGCGCGGTAAGGAACCTCAAGAAGAAATTCCTTGAGAACACCCCGCGATTGCAGCACTCCGCGAGTCTATCCA  
ACAGACACTTGTGAGTCCCTCTCAATGGGTAGCTGGTGAGCAACAAGTCAAGTGGAAACGCCGCTGGATTAAAGGTC  
TGGATGGTTCGTAAGGTACACGTTTCGTAGTCCCTCACGCTGCCTTGAATACCCTACTGCAATCTGCTGGTGCCTCATC  
TGCAAATGTGGATTATCAAGACCGAAGAGATGCTCGTAGAGAAAGGCTTGAAGCATGGCTGGGATGGGGACTTTGC  
GTACATGGCATGGGTACATGATGAAATCCAAGTAGGCTGCCGTACCGAAGAGATTGCTCAGGTGGTCATTGAGACCG  
CACAAGAAGCGATGCGCTGGGTTGGAGATCACTGGAACCTCCGGTGTCTTCTGGATACCGAAGGTAAGATGGGTCT  
AATTGGGCGATTGGCCACTGATACAGGAGGCTACTCATGAACGAAAGACACTTAACAGGTGCTGCTTCTGAAATGCT  
AGTAGCCTACAAATTTACCAAAGCTGGGTACACTGTCTATTACCCTATGCTGACTCAGAGTAAAGAGGACTTGGTTG  
TATGTAAGGATGGTAAATTTAGTAAGATTACAGGTTAAAACAGCCACAACCGTTCAAACCAACACAGGAGATGCCAAG  
CAGGTTAGGCTAGGTGGATGCGGTAGGTCCGAATATAAGGATGGAGACTTTGACATTCTTGCGGTTGTGGTTGACGA  
AGATGTGCTTATTTTACATGGGACGAAGTAAAAGGTAAGACATCCATGTGTGTGCGCAAGAGAAAACAAAGGCATAA  
AACTATAGGAGAAATTTATGAGTATGACAAAGAAATTTAAAGTGTCTTTCGACGTTACCGCAAAGATGTGCTCTG  
ACGTTACAGGCAGTCTTAGAGAAAGATATGCTGCATCTATGTAAGCAGGTCCGGCTCAGGTGCGATTGTCCCAATGGT  
AAACAGAAGGAAATGATTGTCCAGTTCCTGACACACGGTATGGAAGGATTGATGACATTTCGTAGTACGTACATCATT  
TCGTGAGGCCATTAAGGACATGCACGAAGAGTATGCAGATAAGGACTCTTCAAACAATCTCCTGCAACAGTACGGG  
AGGTGTTCTGATGTCTGACTACCTGAAAGTGTGCAAGCAATCAAAGTTGCCCTAAGACTTTCCAGTCCAACATATG  
TACGGAACAATGCGAGCCTCGTAGCGGAGGCCGCTTCCCGTGGTACATCTCGTGCCTGACTACTAGTGGACGTAAC  
GGTGGCGCTTGGGAAATCACTGCTTCCGGTACTCGCTTTCTGAAACGAATGGGAGGATGTGTCTAATGTCTCGTGAC  
CTTGTGACTATTCCACGCGATGTGTGGAACGATATACAGGGCTACATCGACTCTCTGGAACGTGAGAACGATAGCCT  
TAAGAATCAACTAATGGAAGCTGACGAATACGTAGCGGAACTAGAGGAGAACTTAATGGCACTTCTTGACCTTAAA  
CAATTCTATGAGTTACGTGAAGGCTGCGACGACAAGGGTATCCTTGTGATGGACGGCGACTGGCTGGTCTTCCAAGC  
TATGAGTGTGCTGAGTTTGTGCTCCTTGGGAGGAAGAGATTTGGCACCGATGCTGTGACCACGCTAAGGCCGCTC  
AGATTCTTGAGGATTCCATTAAGTCCACGAGACCCGTAAGAAGGCTTGGGCAGGTGCTCCAATTGTCTTGCCTTC  
ACCGATAGTGTAACTGGCGTAAAGAACTGGTTGACCCGAACATAAGGCTAACCGTAAGGCCGTAAGAAACCTGT  
AGGTACTTTGAGTTCTTGTGCTCTCTTTGAGCGCGAAGAGTTCTATTGCATCCGTGAGCCTATGCTTGGGGTG  
ATGACGTTATGGGAGTTATTGCTTCCAATCCGTCTGCCTTCCGGTGTGCTGTAAGGCTGTAATCATCTCTTGCGATAAG  
GACTTTAAGACCATCCCTAACTGTGACTTCCCTGTGGTGTACCCTGGTAACATCCTGACTCAGACCGAAGAGTCCGC  
TGACTGGTGGCACCTCTTCCAGACCATCAAGGGTGCATCACTGATGGTTACTCAGGGATTGCTGGATGGGGTGATA  
CCGCCGAGGACTTCTTGAATAACCCGTTTATAACCGAGCCTAAAACGCTCTGTGCTTAAAGTCCGGTAAAGAACAAGGC  
CAAGAGGTTACTAAATGGGTTAAACGCGACCCTGAGCCTCATGAGACGCTTTGGGACTGCATTAAGTCCATTGGCGC  
GAAGGCTGGTATGACCGAAGAGGATATTATCAAGCAGGGCCAAATGGCTCGAATCCTACGGTTCAACGAGTACAAC  
TTATTGACAAGGAGATTTACCTGTGGAGACCGTAGCGTATATTGGTCTGGATCTTTGTGTTCTCGGAGTGTGCCTCA  
TTTCGTGGGGCTTTGGGACTTAGCCAGAATAATCAAGTCTGTACACGACACTAAGTGATAAACTCAAGGTCCCTAA  
ATTAATACGACTCACTATAGGGAGATAGGGGCTTTACGATTATTACTTTAAGATTTAACTCTAAGAGGAATCTTTA  
TTATGTTAACACCTATTAACCAATTACTTAAGAACCCTAACGATATTCCAGATGTACCTCGTGAACCGCTGAGTAT

CTACAGGTTTCGATTCAACTATGCGTACCTCGAAGCGTCTGGTCATATAGGACTTATGCGTGCTAATGGTTGTAGTGA  
GGCCACATCTTGGGTTTTATTTCAGGGCCTACAGTATGCCTCTAACGTCATTGACGAGATTGAGTTACGCAAGGAAC  
AACTAAGAGATGATGGGGAGGATTGACACTATGTGTTTTCTCACCGAAAATTTAAACTCCGAAGATGGATACCAATCA  
GATTCGAGCCGTTGAGCCAGCGCCTCTGACCCAAGAAGTGTCAAGCGTGGAGTTCCGGTGGGTCTTCTGATGAGACGG  
ATACCGAGGGCACCGAAGTGTCTGGACGCAAAGGCCTCAAGGTGCAACGTGATGATTCCGTAGCGAAGTCTAAAGCC  
AGCGGCAATGGCTCCGCTCGTATGAAATCTTCCATCCGTAAGTCCGCATTTGGAGGTAAGAAGTGTATGTCTGAGTTC  
ACATGTATGGAGGCTAAGAGTGCCTTCCGTGCAATCCGGTGGACTGTGGAACACCTTGGGTTGCCTAAAGGATTCTGA  
AGGACACTTTGTGGGCTACAGCCTCTACGTAGACGAAGTGTGGACATGTCTGGTTGCCGTGAAGAGTACATTCTGG  
ACTCTACCGGAAAACATGTAGCGTACTTCGCGTGGTGCCTAAGCTGTGACATTCACCACAAAGGAGACATTCTGGAT  
GTAACGTCCGTTGTCATTAACTCTGAGGCAGACTCTAAGGGCTTACAGCGATTCCTAGCGAAAACGCTTTAAGTACCT  
TGCGGACTCCACGATTGCGATTGGGTGTCTCGTTGTAAGCATGAAGGCGAGACAATGCGTGTATACTTTAAGGAGG  
TATAAGTTATGGGTAAGAAAAGTTAAGAAGGCCGTGAAGAAAAGTCAACAAGTCCGTTAAGAAAAGTCTGTTAAGGAGG  
GCTCGTCCGGTTAAACAGGTTGCTGGCGGTCTAGCTGGTCTGGCTGGTGGTACTGGTGAAGCACAGATGGTGAAGT  
ACCACAAGCTGCCGCACAGATTGTTGACGTACCTGAGAAAAGAGGTTTCCACTGAGGACGAAGCACAGACAGAAAAGCG  
GACGCAAGAAAAGCTCGTGCTGGCGGTAAGAAATCCTTGAGTGTAGCCCCTAGCTCCGGTGGCGGTATCAACATTTAA  
TCAGGAGGTTATCGTGGAAGACTGCATTGAATGGACCGGAGATGTCAACTCTAAGGGTTATGGTTCGTAAGTGGGTTA  
ATGGTAAACTTGTGACTCCACATAGGCACATCTATGAGGAGACATATGGTCCAGTTCCAAACAGGAATTGTGGTGATG  
CATATCTGCGATAACCCTAGGTGCTATAACATAAAGCACCTTACGCTTGGAACTCCAAAGGATAATTCCGAGGACAT  
GGTTACCAAAGGTAGACAGGCTAAAGGAGAGGAACCTAAGCAAGAAAACCTTACAGAGTCAGACGTTCTCGCTATACGCT  
CTTCAACCTTAAGCCACCGCTCCTTAGGAGAAGTGTATGGAGTCAGTCAATCAACCATAACGCGAATACTACAGCGT  
AAGACATGGAGACACATTTAATGGCTGAGAAAACGAACAGGACTTGCAGGAGGATGGCGCAAAGTCTGTCTATGAGCGT  
TTAAAGAACGACCGTGTCCCTATGAGACACGCGCTCAGAATTGCGCTCAATATAACCATCCCATCATTGTTCCCTAA  
GGACTCCGATAACGCCTCTACAGATTATCAAACCTCCGTGGCAAGCCGTGGGCGCTCGTGGTCTGAACAATCTAGCCT  
CTAAGCTCATGCTGGCTCTATTCCCTATGCAGACTTGGATGCGACTTACTATATCTGAATATGAAGCAAAGCAGTTA  
CTGAGCGACCCCGATGGACTCGCTAAGGTGATGAGGGCCTCTCGATGGTAGAGCGTATCATCATGAACTACATTGA  
GTCTAACAGTTACCGCGTACTCTCTTTGAGGCTCTCAAACAGTTAGTCGTAGCTGGTAACGTCCTGCTGTACCTAC  
CGGAACCGGAAGGGTCAAACATAATCCCATGAAGCTGTACCGATTGTCTTCTTATGTGGTCCAACGAGACGCATTC  
GGCAACGTTCTGCAAATGGTGACTCGTGACCAGATAGCTTTTGGTGTCTCCCTGAGGACATCCGTAAGGCTGTAGA  
AGGTCAAGGTGGTGAGAAGAAAGCTGATGAGACAATCGACCTGTACACTCACATCTATCTGGATGAGGACTGAGTG  
AATACCTCCGATACGAAGAGGTCGAGGGTATGGAAGTCCAAGGCTCCGATGGGACTTATCCTAAAGAGGCTTGCCCA  
TACATCCCGATTTCGGATGGTCAGACTAGATGGTGAATCCTACGGTCTTTCGTACATTGAGGAATACTTAGGTGACTT  
ACGGTCCCTTGAAAATCTCCAAGAGGCTATCGTCAAGATGTCCATGATTAGCTCTAAGGTTATCGGCTTAGTGAATC  
CTGCTGGTATCACCCAGCCACGCCGACTGACCAAAGCTCAGACTGGTGACTTCGTTACTGGTTCGTCAGAAAGACATC  
TCGTTCCCTCCAACCTGGAGAAGCAAGCAGACTTTACTGTAGCTAAAGCCGTAAGTACGCTATCGAGGCTCGCCTTTC  
GTTTTGCCTTTTATGTTGAACTCTGCGGTTTACGCGTACAGGTGAACGTGTGACCGCCGAAGAGATTCCGGTATGTAGCTT  
CTGAACTTGAAGATACTTTAGGTGGTGTCTACTCTATCCTTTCTCAAGAATTACAATTGCCTCTGGTACGAGTGCTC  
TTGAAGCAACTACAAGCCACGCAACAGATTCTGAGTTACCTAAGGAAGCCGTAGAGCCAACCATTAGTACAGGTCT  
GGAAGCAATTGGTCGAGGACAAGACCTTGATAAGCTGGAGCGGTGTGTCACTGCGTGGGCTGCACTGGCACCTATGC  
GGGACGACCCTGATATTAACCTTGCATGATTAAGTTACGTATTGCCAACGCTATCGGTATTGACACTTCTGGTATT  
CTACTCACCGAAGAACAGAAGCAACAGAAGATGGCCCAACAGTCTATGCAAATGGGTATGGATAATGGTGTCTGCTGC  
GCTGGCTCAAGGTATGGCTGCACAAGCTACAGCTTACCTGAGGCTATGGCTGCTGCCGCTGATTCCGTAGGTTTAC  
AGCCGGGAATTTAATACGACTCACTATAGGGGAGACCTCATCTTTGAAATGAGCGATGACAAGAGGTTGGAGTCCCTCG  
GTCTTCCCTGTAGTTCAACTTTAAGGAGACAATAATAATGGCTGAATCTAATGCAGACGTATATGCATCTTTTGGCGT  
GAACTCCGCTGTGATGTCTGGTGGTTCGGTTGAGGAACATGAGCAGAACATGCTGGCTCTTGATGTTGCTGCCCGTG  
ATGGCGATGATGCAATCGAGTTAGCGTCAGACGAAGTGGAAACAGAACGTGACCTGTATGACAACCTCTGACCCGTT  
GGTCAAGAGGATGACGAAGCCCGCATTACAGTTTCGTATCGGTGATGGCTCTGAGCCGACCGATGTGGACACTGGAGA  
AGAAGGCGTTGAGGGCACCGAAGGTTCCGAAGAGTTTACCCCACTGGGCGAGACTCCAGAAGAAGTGGTAGTGCCT  
CTGAGCAACTTGGTGTGACGACGAAGAGGGCTTCCAAGAGATGATTAACATTGCTGCTGAGCGTGGCATGAGTGTGAG  
ACCATTGAGGCTATCCAGCGTGTGATACGAGGAGAACGAAGAGTTGTCCGCCGAGTCTACGCTAAGCTGGCTGAAAT  
TGGCTACACGAAGGCTTTTATTGACTCGTATATCCGTGGTCAAGAAGCTCTGGTGGAGCAGTACGTAACAGTGTCA  
TTGAGTACGCTGGTGGTTCGTGAACGTTTTGATGCACTGTATAACCACCTTGGAGACGCACAACCCTGAGGCTGCACAG  
TCGCTGGATAATGCGTTGACCAATCGTGACTTAGCGACCGTTAAGGCTATCATCAACTTGGCTGGTGTGAGTCTCGCGC  
TAAGGCGTTCCGTCGTAAGCCAACCTCGTAGTGTGACTAATCGTGCTATTCCGGCTAAACCTCAGGCTACCAAGCGTG  
AAGGCTTTGCGGACCGTAGCGAGATGATTAAGCTATGAGTGACCCTCGGTATCGCACAGATGCCAACTATCGTCTG  
CAAGTCAACAGAAAAGTAATCGATTGCAACTTCTGATAGACTTCAAAATTAATACGACTCACTATAGGGGAGACCACA  
ACGGTTTTCCCTTAGAAATAATTTTGTAACTTTAAGAAGGAGATATACATATGGCTAGCATGACTGGTGGACAGC  
AAATGGGTACTAACCAAGGTAAGGTGTAGTTGCTGCTGGAGATAAACTGGCGTTGTTCTTGAAGGTATTTGGCGGT

GAAGTCCTGACTGCGTTTCGCTCGTACCTCCGTGACCACTTCTCGCCACATGGTACGTTCCATCTCCAGCGGTAATC  
CGCTCAGTTCCCTGTTCTGGGTCGCACTCAGGCAGCGTATCTGGCTCCGGGCGAGAACCTCGACGATAAACGTAAGG  
ACATCAAACACACCCGAGAAGGTAATCACCATTGACGGTCTCCTGACGGCTGACGTTCTGATTTATGATATTGAGGAC  
GCGATGAACCACTACGACGTTTCGCTCTGAGTATACCTCTCAGTTGGGTGAATCTCTGGCGATGGCTGCGGATGGTGC  
GGTCTGGCTGAGATTGCCGGTCTGTGTAACGTGGAAAGCAAATATAATGAGAACATCGAGGGCTTAGGTACTGCTA  
CCGTAATTGAGACCACTCAGAACAAGGCCGCACTTACCGACCAAGTTGCGCTGGGTAAGGAGATTATTGCGGCTCTG  
ACTAAGGCTCGTGCGGCTCTGACCAAGAATATGTTCCGGCTGCTGACCGTGTGTTCTACTGTGACCCAGATAGCTA  
CTCTGCGATTCTGGCAGCACTGATGCCGAACGCAGCAAACCTACGCTGCTCTGATTGACCCTGAGAAGGGTTCTATCC  
GCAACGTTATGGGCTTTGAGGTTGTAGAAGTTCGCGACCTCACCCTGGTGGTGTGGTACCCTCGTGAGGGCACT  
ACTGGTCAGAAGCAGCTCTCCCTGCCAATAAAGGTGAGGGTAATGTCAAGTTGCTAAGGACAACGTTATCGGCCT  
GTTTCATGACCCGCTCTGCGGTAGGTACTGTTAAGCTGCGTGACTTGGCTCTGGAGCGCGCTCGCCGTCTAACTCC  
AAGCGGACCAGATTATCGTAAGTACGCAATGGGCCACGGTGGTCTTCGCCCAGAAGCTCGAGGAGCTGTCTGATT  
CAGTCAGGTGTGATGCTCGGGGATCCGAATTCGAGCTCCGTCTAATACGACTCACTATAGCTAAACATTAATCATT  
AAAATAAGGAGGTAAAGCATGAAATATCTTCTGCCTACGGCTGCCACGGGTTTGTACTGCTTGCAGCTCAGCCAGC  
GGTCGCCATGGTATTCACACTGGAGGATTTTGTGCGTGACTGGCGCCAGACTGCTGGATATAATCTTGATCAAGTGC  
TGGAGCAAGGAGGCGTCTCAAGCCTTTTCCAGAATTTAGGTGTTAGCGTCACACCGATTCAACGTATCGTGCTGAGT  
GGGGAGAACGGCTTAAAAATCGACATCCACGTCATCATTCCATATGAAGGGTTGTCAGGGGATCAGATGGGTGAGAT  
TGAAAAGATTTTTAAGGTTGTCTACCCAGTAGACGACCATCACTTCAAGGTTATTTTACACTACGGTACATTAGTAA  
TTGACGGCGTGACTCCTAACATGATTGACTATTTTGGACGCCCGTATGAGGGGATTGCAGTGTTCGACGGCAAGAAG  
ATCACAGTTACGGGGACTCTGTGGAATGGGAATAAAATTATCGACGAGCGTCTGATTAACCCCGATGGCTCTCTGTT  
GTTCCGTGTCACTATTAACGGTGTACGGGCTGGCGCCTTTGTGAACGCATTTTAGCAGGCTCGAGCGGCCCTACGT  
CAGGTCCGGCCGGTTGCCAAGTTTTATGGGGGGTCAACCAGTGAACACAGGCTTTACGGCGAACGTTACTGTCAAG  
AACACAAGCTCCGCTCCTGTGGATGGTTGGACACTGACCTTTTCTTTCCCTCAGGTGACCAAGTGACACAGGCGTG  
GAGTTCTACGGTTACACAATCTGGTTCTGCTGTTACTGTCCGTAACGCGCCCTGGAATGGAAGCATCCCAGCGGGCG  
GGACCGCACAGTTTGGCTTCAATGGCTCTCATAACGGGACAAACGCAGCACCAACAGCATTTCCTTGAATGGAACC  
CCTTGCCTGTGCGATAAGCTTGGCGCCGCACTCGAGTAACTAGTTAACCCCTTGGGGCCTCTAAACGGGTCTTGAG  
GGGTTTTTTGCTGAAAGGAGGAACTATATGCGCTCATAACGATGAACGTTGAGACTGCCGCTGAGTTATCAGCTGT  
GAACGACATTTCTGGCGTCTATCGGTGAACCTCCGGTATCAACGCTGGAAGGTGACGCTAACCGGATGCAGCGAACG  
CTCGGCGTATTCTCAACAAGATTAACCGACAGATTCAATCTCGTGGATGGACGTTCAACATTGAGGAAGGCATAACG  
CTACTACCTGATGTTTACTCCAACCTGATTGTATACAGTACGACTATTTATCCCTAATGTCTACTTCCGGTCAATC  
CATCTACGTTAACCGAGGTGGCTATGTGTATGACCGAACGAGTCAATCAGACCGCTTTGACTCTGGTATTACTGTGA  
ACATTATTCGCTCCTCGCGACTACGATGAGATGCCTGAGTGCTTCCGTTACTGGATTGTCACCAAGGCTTCCCCTCAG  
TTCAACAACCGATTCTTTGGGGCACCGGAAGTAGAGGGTGTACTCCAAGAAGAGGAAGATGAGGCTAGACGCTCTCTG  
CATGGAGTATGAGATGGACTACGGTGGGTACAATATGCTGGATGGAGATGCGTTCACCTTCTGGTCTACTGACTCGCT  
AACATTAATAAATAAGGAGGCTCTAATGGCACTCATTAGCCAATCAATCAAGAACCTTGAAGGGTGGTATCAGCCAAC  
AGCCTGACATCCTTCGTTATCCAGACCAAGGGTACGCCAAGTTAACGGTTGGTCTTCGGAGACCGAGGGCCTCCAA  
AAGCGTCCACCTCTTGTTCCTTAAATACACTTGGAGACAACGGTGCCTTAGGTCAAGCTCCGTACATCCACCTGAT  
TAACCGAGATGAGCACGAACAGTATTACGCTGTGTTCACTGGTAGCGGAATCCGAGTGTTCGACCTTTCTGGTAACG  
AGAAGCAAGTTAGGTATCCTAACGGTTCCAACCTACATCAAGACCGCTAATCCACGTAACGACCTGCGAATGGTTACT  
GTAGCAGACTATACGTTTCATCGTTAACCGTAACGTTGTTGCACAGAAGAACACAAAGTCTGTCAACTTACCGAATTA  
CAACCCTAATCAAGACGGATTGATTAACGTTTCGTGGTGGTCAAGTATGGTAGGGAACTAATTGTACACATTAACGGTA  
AAGACGTTGCGAAGTATAAGATACCAGATGGTAGTCAACCTGAACACGTAACAATACGGATGCCCAATGGTTAGCT  
GAAGAGTTAGCCAAGCAGATGCGCACTAACTTGTCTGATTGGACTGTAAATGTAGGGCAAGGGTTCATCCATGTGAC  
CGCACCTAGTGGTCAACAGATTGACTCCTTCACGACTAAAGATGGCTACGCAGACCAAGTTGATTAACCCCTGTGACCC  
ACTACGCTCAGTCGTTCTCTAAGCTGCCACCTAATGCTCCTAACGGCTACATGGTGAATAATCGTAGGGGACGCTCT  
AAGTCTGCCGACCAGTATTACGTTCCGGTATGACGCTGAGCGGAAAGTTTGGACTGAGACTTTAGGTTGGAACACTGA  
GGACCAAGTTCTATGGGAAACCATGCCACACGCTCTTGTGCGAGCCGCTGACGGTAATTTTCGACTTCAAGTGGCTTG  
AGTGGTCTCCTAAGTCTTGTGGTGACGTTGACACCAACCCCTTGGCCTTCTTTTGTGGTTCAAGTATTAACGATGTG  
TTCTTCTTCCGTAACCGCTTAGGATTCCTTAGTGGGGAGAACATCATATTGAGTCGTACAGCCAAATACTTCAACTT  
CTACCCTGCGTCCATTGCGAACCTTAGTGATGACGACCCTATAGACGTAGCTGTGAGTACCAACCGAATAGCAATCC  
TTAAGTACGCCGTTCCGTTCTCAGAAGAGTTACTCATCTGGTCCGATGAAGCACAAATTCGTCCTGACTGCCTCGGGT  
ACTCTCACATCTAAGTCGGTTGAGTTGAACCTAACGACCCAGTTTGGACTACAGGACCGAGCGAGACCTTTTGGGAT  
TGGGCGTAATGTCTACTTTGCTAGTCCGAGGTCCAGCTTACGTCATCCACAGGTAACGCTGTGCAGGATGTCA  
GTTCCGTTAAGAATGCTGAGGACATTACATCACACGTTCTTAACCTACATCCCTAATGGTGTGTTCAAGTATTTGCGGA  
AGTGGTACGGAAAACCTTCTGTTCCGGTACTATCTCACGGGGACCCTAGTAAAATCTTCATGTACAAATTCCTGTACCT  
GAACGAAGAGTTAAGGCAACAGTCTGGTCTCATTGGGACTTTGGGGAAAACGTACAGGTTCTAGCTTGTGAGAGTA  
TCAGCTCAGATATGTATGTGATTCTTCGCAATGAGTTCAATACGTTCTTAGCTAGAATCTCTTTCACTAAGAACGCC

ATTGACTTACAGGGAGAACCCTATCGTGCCTTTATGGACATGAAGATTTCGATACACGATTCCCTAGTGGAACATACAA  
CGATGACACATTCACTACCTCTATTTCATATTCCAACAATTTATGGTGCAAACCTTCGGGAGGGGGCAAATCACTGTAT  
TGGAGCCTGATGGTAAGATAACCGTGTGGAGCAACCTACGGCTGGGTGGAATAGCGACCCTTGGCTGAGACTCAGC  
GGTAACTTGGAGGGACGCATGGTGTACATTGGGTTCAACATTAACCTTCGTATATGAGTTCTCTAAGTTCCCTCATCAA  
GCAGACTGCCGACGACGGGTCTACCTCCACGGAAGACATTGGGCGCTTACAGTTACGCCGAGCGTGGGTAACTACG  
AGAACTCTGGTACGTTTGGACATTTATGTTGAGAACCAATCGTCTAACTGGAAGTACACAATGGCTGGTGCCCGATTA  
GGCTCTAACACTCTGAGGGCTGGGAGACTGAACTTAGGGACCGGACAATATCGATTCCCTGTGGTTGGTAACGCCAA  
GTTCAACACTGTATACATCTTGTGAGATGAGACTACCCCTCTGAACATCATTGGGTGTGGCTGGGAAGGTAACACT  
TACGGAGAAGTTCGGGTATTTAATTAATATTTCTCCCTGTGGTGGCTCGAAATTAATACGACTCACTATAGGGAGAA  
CAATACGACTACGGGAGGGTTTTCTTATGATGACTATAAGACCTACTAAAAGTACAGACTTTGAGGTATTCACCTCG  
GCTCACCATGACATTTCTGAAGCTAAGGCTGCTGGTATTGAGCCGAGTTTTCCCTGATGCTTCCGAGTGTGTACAGTT  
GAGCCTCTATGGGTTCCCTCTAGCTATCGGTGGTAACTGCGGGGACCAGTGTGGTTCTGTTACGAGCGACCAAGTGT  
GGCGACTTAGTGGAAAGGCTAAGCGAAAGTTCCGTAAGTTAATCATGGAGTATCGCGATAAGATGCTTGAGAAGTAT  
GATACTCTTTGGAATTACGTATGGGTAGGCAATACGTCCCACATTCGTTTTCTCAAGACTATCGGTGCGGTATTCCA  
TGAAGAGTACACACGAGATGGTCAATTTTCAGTTATTTACAATCACGAAAGGAGGATAACCATATGTGTTGGGCAGCC  
GCAATACCTATCGCTATATCTGGCGCTCAGGCTATCAGTGGTCAGAACGCTCAGGCCAAAATGATTGCCGCTCAGAC  
CGCTGCTGGTCGTCAAGCTATGGAATCATGAGGCAGACGAACATCCAGAATGCTGACCTATCGTTGCAAGCTC  
GAAGTAACTTGAGGAAGCGTCCGCCGAGTTGACCTCACAGAACATGCAGAAGGTCCAAGCTATTGGGTCTATCCGA  
GCGGCTATCGGAGAGAGTATGCTTGAAGGTTCCCTCAATGGACCGCATTAAAGCGAGTACAGAAGGACAGTTTCATT  
GGAAGCCAATATGGTAACTGAGAATATCGCCGTGACTACCAAGCAATCTTCGCACAGCAACTTGGTGGTACTCAA  
GTGCTGCAAGTACAGTTGACGAAATCTATAAGAGCGAACAGAAACAGAAGAGTAAGCTACAGATGGTTCTGGACCCA  
CTGGCTATCATGGGGTCTTCCGCTGCGAGTGTACGCATCCGGTGCCTTCGACTCTAAGTCCACAACCTAAGGCACC  
TATTGTTGCCGCTAAAGGAACCAAGACGGGGAGGTAATGAGCTATGAGTAAAATTGAATCTGCCCTTCAAGCGGCAC  
AACCGGGACTCTCTCGGTTACGTGGTGGTGTGGAGGTATGGGCTATCGTGCAGCAACCCTCAGGCCGAACAGCCA  
AGGTCAAGCCTATTGGACACCATTGGTCGGTTCGCTAAGGCTGGTGCCGATATGTATACCGCTAAGGAACAACGAGC  
ACGAGACCTAGCTGATGAACGCTCTAACGAGATTATCCGTAAGCTGACCCCTGAGCAACGTCGAGAAGCTCTCAACA  
ACGGGACCCTTCTGTATCAGGATGACCCATACGCTATGGAAGCACTCCGAGTCAAGACTGGTCGTAACGCTGCGTAT  
CTTGTGGACGATGACGTTTATGCAGAAGATAAAAAGAGGTTGTCTTCCGTAATCGCGAAGAGATGGAAGAGTATCGCA  
TAGTCGCTTCAAGAGGGCGCTAAGGTATACGCTGAGCGATTCGGCATCGACCCTGAGGACGTTGATTATCAGCGTG  
GTTTTCAACGGGGACATTACCAGCGTAACATCTCGCTGTATGGTGCGCATGATAACTTCTTGAGCCAGCAAGCTCAG  
AAGGGCGCTATCATGAACAGCCGAGTGGAACTCAACGGTGTCTTCAAGACCCTGATATGCTGCGTCCGAGACTC  
TGCTGACTTCTTTGAGAAGTATATCGACAACGGTCTGGTTACTGGCGCAATCCCATCTGATGCTCAAGCCACACAGC  
TTATAAGCCAAGCGTTTCAGTGACGCTTCTAGCCGTGCTGGTGGTGTGACTTCCCTGATGCGAGTCCGGTACAAGAAG  
GTAACACTTAACGGAGCCACTACGACTTACCGAGAGTTGATTGGTGAGGAACAGTGGAAACGCTCTCATGGTCACAGC  
ACAACGTTCTCAGTTTGGAGACTGACGCGAAGCTGAACGAGCAGTATCGCTTGAAGATTAACCTCTGCGCTGAACCAAG  
AGGACCCAAGGACAGCTTGGGAGATGCTTCAAGGTATCAAGGCTGAACTAGATAAGGTCCAACCTGATGAGCAGATG  
ACACCACAACGTGAGTGGCTAATCTCCGCACAGGAACAAGTTCAGAATCAGATGAACGCATGGACGAAAGCTCAGGC  
CAAGGCTCTGGACGATTCCATGAAGTCAATGAACAACTTGCAGTAACTCGACAAGCAATTCAGAAGCGAATCAACG  
GTGAGTGGGTCTCAACGGATTTTAAAGGATATGCCAGTCAACGAGAACACTGGTGAGTTCAAGCATAGCGATATGGTT  
AACTACGCCAATAAGAAGCTCGCTGAGATTGACAGTATGGACATTCCAGACGGTGCCAAGGATGCTATGAAGTTGAA  
GTACCTTCAAGCGGACTCTAAGGACGGAGCATTCCGTACAGCCATCGGAACCATGGTCACTGACGCTGGTCAAGAGT  
GGTCTGCCGCTGTGATTAACGGTAAGTTACCAGAACGAACCCAGCTATGGATGCTCTGCGCAGAATCCGCAATGCT  
GACCCTCAGTTGATTGCTGCGCTATACCCAGACCAAGCTGAGCTATTCCCTGACGATGGACATGATGGACAAGCAGGG  
TATTGACCCTCAGGTTATTCTTGATGCCGACCGACTGACTGTTAAGCGGTCCAAAGAGCAACGCTTTGAGGATGATA  
AAGCATTCCGAGTCTGCACTGAATGCATCTAAGGCTCCTGAGATTGCCCGTATGCCAGCGTCACTGCGCGAATCTGCA  
CGTAAGATTTATGACTCCGTTAAGTATCGCTCGGGGAACGAAAGCATGGCTATGGAGCAGATGACCAAGTTCTTAA  
GGAATCTACCTACACGTTCACTGGTGTATGATGTTGACGGTGTATACCGTTGGTGTGATTCCCTAAGAATATGATGCAGG  
TTAACTCTGACCCGAAATCATGGGAGCAAGGTCCGGATATTCTGGAGGAAGCACGTAAGGGAATCATTGCGAGCAAC  
CCTTGGATAACCAATAAGCAACTGACCATGTATTCTCAAGGTGACTCCATTTACCTTATGGACACCACAGGTCAAGT  
CAGAGTCCGATACGACAAAGAGTTACTCTCGAAGGTCTGGAGTGAGAACCAGAAGAACTCGAAGAGAAAGCTCGTG  
AGAAGGCTCTGGCTGATGTGAACAAGCGAGCACCTATAGTTGCCGCTACGAAGGCCCGTGAAGCTGCTGCTAAACGA  
GTCCGAGAGAAACGTAAACAGACTCCTAAGTTCATCTACGGACGTAAGGAGTAACTAAAGGCTACATAAGGAGGCC  
TAAATGGATAAGTACGATAAGAACGTACCAAGTGATTATGATGGTCTGTTCCAAAAGGCTGCTGATGCCAACGGGGT  
CTCTTATGACCTTTTACGTAAAGTTCGCTTGGACAGAATCACGATTTGTGCCTACAGCAAAATCTAAGACTGGACCAT  
TAGGCATGATGCAATTTACCAAGGCAACCGCTAAGGCCCTCGGTCTGCGAGTTACCGATGGTCCAGACGACGACCGA  
CTGAACCCTGAGTTAGCTATTAATGCTGCCGCTAAGCAACTTGCAGGTCTGGTAGGGAAGTTTATGGCGATGAACT  
CAAAGCTGCCCTTGGCTACAACCAAGGCGAGGGACGCTTGGGTAATCCACAACCTTGGGCGTACTCTAAGGGAGACT

TCGCATCAATCTCTGAGGAGGGACGTAACACTACATGCGTAACCTTCTGGATGTTGCTAAGTCACCTATGGCTGGACAG  
TTGGAAACTTTTTGGTGGCATAACCCCAAAGGGTAAAGGCATTCCGGCTGAGGTAGGATTGGCTGGAATTTGGTACAA  
GCAGAAAGTAACACAGGAACCTTCTGAGTCCACAAGTTTTGACGTTAAGGGTATCGAACAGGAGGCTACGGCGAAAC  
CATTTCGCCAAGGACTTTTTGGGAGACCCACGGAGAAACACTTGACGAGTACAACAGTCGTTCAACCTTCTTCGGATT  
AAAAATGCTGCCGAAGCTGAACCTCCAACCTCAGTCGCTGGGATGGCTTTCCGTGCTGGTCTCGATAATGGTTT  
TGATGTGTTTTAAAGACACCATTACGCCGACTCGCTGGAACCTCACATCTGGACTCCAGAGGAGTTAGAGAAGATTC  
GAACAGAGGTTAAGAACCCTGCGTACATCAACGTTGTAACCTGGTGGTTCGCCCTGAGAACCCTCGATGACCTCATTA  
TTGGCTAACGAGAACTTTGAGAATGACTCCCGCGCTGCCGAGGCTGGCCTAGGTGCCAAACTGAGTGTGGTATTAT  
TGGTGTGGTGTGGACCCGCTTAGCTATGTTCCCTATGGTCGGTGTCACTGGTAAGGGCTTTAAGTTAATCAATAAG  
CTCTTGTAGTTGGTGCCGAAAGTGTCTGCTGAACGTTGCATCCGAAGGTCTCCGTACCTCCGTAGCTGGTGGTGC  
GCAGACTATGCGGGTGTCTGCCTTAGTGGCTTTGTGTTTTGGCGCAGGCATGTCTGCAATCAGTGACGCTGTAGTGC  
TGGACTGAAACGCAGTAAACCAGAAGCTGAGTTCGACAATGAGTTCATCGGTCTATGATGCGATTGGAAGCCCGTG  
AGACAGCACGAAACGCCAACTCTGCGGACCTCTCTCGGATGAACACTGAGAACATGAAGTTTTGAAGGTGAACATAAT  
GGTGTCCCTTATGAGGACTTACCAACAGAGAGAGGTGCCGTGGTGTACATGATGGCTCCGTTCTAAGTGCAAGCAA  
CCCAATCAACCCTAAGACTCTAAAAGAGTTCTCCGAGGTTGACCCTGAGAAGGCTGCGCGAGGAATCAAACCTGGCTG  
GGTTCACCGAGATTGGCTTGAAGACCTTGGGGTCTGACGATGCTGACATCCGTAGAGTGGCTATCGACCTCGTTCCG  
TCTCCTACTGGTATGCAGTCTGGTGCCTCAGGTAAGTTCGGTGCAACAGCTTCTGACATCCATGAGAGACTTCATGG  
TACTGACCAGCGTACTTATAATGACTTGTACAAAGCAATGTCTGACGCTATGAAAGACCCTGAGTTCCTACTGCGC  
GCGCTAAGATGTCCCGTGAAGAACTCGATACTATCTACCGTAGAGCGGCACTAGCTATTGAGCGTCCAGAATA  
CAGAAGGCACTACTCCGTCTGAGAGAATCGTTATGGACATCATTAAAGCGTCACTTTGACACCAAGCGTGAACCTT  
GGAAAACCCAGCAATATTCGGTAACACAAAGGCTGTGAGTATCTTCCCTGAGAGTGCACAAAGGTACTTACGTT  
CTCACGTATATGACCGTCATGCCAAGGCGCTGATGATTCAACGCTACGGTGCCGAAGGTTTTGCAGGAAGGGATTGCC  
CGCTCATGGATGAACAGCTACGTCTCCAGACCTGAGGTCAAGGCCAGAGTCGATGAGATGCTTAAGGAATTACACGG  
GGTGAAGGAAGTAACACCAGAGATGGTAGAGAAGTACGCTATGGATAAGGCTTATGGTATCTCCCACTCAGACCAGT  
TCACCAACAGTTCATAATAGAAGAGAACATTGAGGGCTTAGTAGGTATCGAGAATAACTCATTCCCTGAGGCACGT  
AATTGTTTTGATTCCGACCTATCCATCACTATGCCAGACGGACAGCAATTCTCAGTGAATGACCTAAGGGACTTCGA  
TATGTTCCGCATCATGCCAGCGTATGACCGCCGTGTCAATGGTGCATCGCCATCATGGGGTCTACTGGTAAAACCA  
CTAAGGAACCTAAGGATGAGATTTTTGGCTCTCAAAGCGAAAGCTGAGGGAGACGGTAAGAAGACTGGCGAGGTACAT  
GCTTTAATGGATAACCGTTAAGATTTCTACTGGTCGTGTAGACGCAATCAGGACACTGTGTGGGAAACCTCACTGCG  
TGCCATCAATGACCTAGGGTTCTTCGCTAAGAACGCCTCATGGGTGCTCAGAACATTACGGAGATTGCTGGGATGA  
TTGTCACTGGTAACGTTTCGTGCTCTAGGGCATGGTATCCCAATTCTGCGTGATACTCTACAAGTCTAAACCAGTT  
TCAGCTAAGGAACCTCAAGGAACCTCATGCGTCTCTGTTCCGGGAAGGAGGTGGACCAGTTGATTCCGGCTAAACGTGC  
TGACATTGTGCAGCGCCTAAGGGAAGCAACTGATACCGGACCTGCCGTGGCGAACATCGTAGGGACCTTGAAGTATT  
CAACACAGGAACCTGGCTGCTCGCTCTCCGTGGACTAAGCTACTGAACGGAACCACTAACTACCTTCTGGATGCTGCG  
CGTCAAGGTATGCTTGGGGATGTTATTAGTGCCACCCTAACAGGTAAGACTACCCGCTGGGAGAAAGAAGGCTTCCCT  
TCGTGGTGCCTCCGTAACCTCCTGAGCAGATGGCTGGCATCAAGTCTCTCATCAAGGAACATATGGTACGCGGTGAGG  
ACGGGAAGTTTTACCGTTAAGGACAAGCAAGCGTTCTCTATGGACCCACGGGCTATGGACTTATGGAGACTGGCTGAC  
AAGGTAGCTGATGAGGCAATGCTGCGTCCACATAAGGTGTCCTTACAGGATTCCCATGCGTTCGGAGCACTAGGTAA  
GATGGTTATGCAGTTTAAAGTCTTTCACTATCAAGTCCCTTAACTCTAAGTTTCTGCGAACCTTCTATGATGGATACA  
AGAACAACCGAGCGATTGACGCTGCGCTGAGCATCATCACCTCTATGGGTCTCGCTGGTGGTTTTCTATGCTATGGCT  
GCACACGTCAAAGCATAACGCTCTGCCTAAGGAGAAACGTAAGGAGTACTTGGAGCGTGCCTGGACCCAAACCATGAT  
TGCCACGCTGCGTTATCTCGTAGTTCTCAATTGGGTGCTCCTTTGGCTATGGTTGACCTAGTTGGTGGTGTTTTAG  
GGTTCGAGTCCTCCAAGATGGCTCGCTCTACGATTCTACCTAAGGACACCGTGAAGGAACGTGACCCAAACAAACCG  
TACACCTCTAGAGAGGTAATGGGCGCTATGGGTTCAAACCTTCTGGAACAGATGCCTTCGGCTGGCTTTGTGGCTAA  
CGTAGGGGCTACCTTAATGAATGCTGCTGGCGTGGTCAACTCACCTAATAAAGCAACCGAGCAGGACTTCATGACTG  
GTCTTATGAACCTCCACAAAAGAGTTAGTACCGAACGACCCATTGACTCAACAGCTTGTGTTGAAGATTTATGAGGCG  
AACGGTGTAACTTGAGGGAGCGTAGGAAATAATACGACTCACTATAGGGAGAGGCGAAATAATCTTCTCCCTGTAG  
TCTCTTAGATTTACTTTAAGGAGGTCAAATGGCTAACGTAATTAACCGTTTTGACTTACCAGTTAGATGGCTCCA  
ATCGTGATTTAATATCCCGTTTTGAGTATCTAGCCCGTAAGTTTCGTAGTGGTAACCTCTTATTGGTGTAGACCGAAAG  
GTCCTTACGATTAATACAGACTATCGCTTTGCTACACGTACTACTATCTCTGACAAAGGCTTGGGGTCCAGCCGA  
TGGCTACACGACCATCGAGTTACGTCGAGTAACCTCCACTACCGACCGATTGGTTGACTTTACGGATGGTTCAATCC  
TCCGCGCGTATGACCTTAACGTGCTCAGATTCAAACGATGCACGTAGCGGAAGAGGCCCCGTGACCTCACTACGGAT  
ACTATCGGTGTCAATAACGATGGTCACTTGGATGCTCGTGGTCTCGAATTGTGAACCTAGCGAACGCCGTGGATGA  
CCGCGATGCTGTTCCGTTTTGGTCAACTAAAGACCATGAACCAGAACTCATGGCAAGCACGTAATGAAGCCTTACAGT  
TCCGTAATGAGGCTGAGACTTTAGAAAACCAAGCGGAGGGCTTTAAGAACGAGTCCAGTACCAACGCTACGAACACA  
AAGCAGTGGCGCGATGAGACCAAGGGTTTTCCGAGACGAAGCCAAGCGGTTCAAGAATACGGCTGGTCAATACGCTAC  
ATCTGCTGGGAACCTCTGCTTCCGCTGCGCATCAATCTGAGGTAACGCTGAGAACCTCTGCCACAGCATCCGCTAACT

CTGCTCATTGTCAGAACAGCAAGCAGACCGTGCAGAACGTGAGGCAGACAAGCTGGAAAATTACAATGGATTGGCT  
GGTGAATTGATAAGGTAGATGGAACCAATGTGTACTGGAAAGGAAATATTACGCTAACGGGCGCCTTTACATGAC  
CACAAACGGTTTTGACTGTGGCCAGTATCAACAGTTCTTTGGTGGTGTCACTAATCGTTACTCTGTGATGGAGTGGG  
GAGATGAGAACGGATGGCTGATGTATGTTCAACGTAGAGAGTGGACAACAGCGATAGGCGGTAACATCCAGTTAGTA  
GTAAACGGACAGATCATCACCCAAGGTGGAGCCATGACCGGTGAGCTAAAATTGCAGAATGGGCATGTTCTTCAATT  
AGAGTCCGCATCCGACAAGGCGCACTATATTCTATCTAAAGATGGTAACAGGAATAACTGGTACATTGGTAGAGGGT  
CAGATAACAACAATGACTGTACCTTCCACTCCTATGTACATGGTACGACCTTAACACTCAAGCAGGACTATGCAGTA  
GTTAACAACACTTCCACGTAGGTGAGCCGTTGTGGCCACTGATGGTAATATTCAAGGTACTAAGTGGGGAGGTAA  
ATGGCTGGATGCTTACCTACGTGACAGCTTCGTTGCGAAGTCCAAGGCGTGGACTCAGGTGTGGTCTGGTAGTGTCTG  
GCGGTGGGGTAAAGTGTGACTGTTTACAGGATCTCCGCTTCCGCAATATCTGGATTAAGTGTGCCAACACTCTTGG  
AACTTCTCCGCTACTGGCCCCGATGGAATCTACTCATAGCCTCTGATGGTGGATGGTTACGATTTCAAATACTACTC  
CAACGGTCTCGGATTCAAGAATATTGCAGACAGTTCGTTTCAAGTCTAATGCAATCATGGTGGAGAACGAGTAATTGG  
TAAATCACAAGGAAAGACGTGTAGTCCACGGATGGACTCTCAAGGAGGTACAAGGTGCTATCATTAGACTTTAACAA  
CGAATTGATTAAGGCTGCTCCAATTGTTGGGACGGGTGTAGCAGATGTTAGTGTGCTGACTGTTCTTTGGGTTAAGCC  
TTAACGAATGGTTCTACGTTGCTGCTATCGCCTACACAGTGGTTCAGATTGGTGCCAAGGTAGTCGATAAGATGATT  
GACTGGAAGAAAGCCAATAAGGAGTGTATGTATGGAAAAGGATAAGAGCCTTATTACATTCTTAGAGATGTTGGAC  
ACTGCGATGGCTCAGCGTATGCTTGCAGACCTTTCCGACCATGAGCGTCTGCTCTCCGCAACTCTATAATGCTATTAA  
CAAATGTTAGACCGCCACAAGTTCAGATTGGTAAGTTCAGCCGGATGTTTACATCTTAGGTGGCCTTGTGGTGT  
CTCTTGAAGAGTACAAAGAGAAAGTCCGGTGTAAACGGTCTTACGGATGATGATATTTACACATTACAGTGTATACT  
CAAGGCCACTACAGATAGTGGTCTTTATGGATGTATTGTCTATACGAGATGCTCCTACGTGAAATCTGAAAGTTAA  
CGGGAGGCATTATGCTAGAATTTTTACGTAAGCTAATCCCTTGGGTTCTCGCTGGGATGCTATTCGGGTTAGGATGG  
CATCTAGGGTCAAGTCAATGGACGCTAAATGGAAACAGGAGGTACACAATGAGTACGTTAAGAGAGTTGAGGCTGC  
GAAGAGCACTCAAAGAGCAATCGATGCGGTATCTGCTAAGTATCAAGAAGACCTTGCCGCGCTGGAAGGGAGCACTG  
ATAGGATTATTTCTGATTTGCGTAGCGACAATAAGCGGTTGCGCGTCAAGACTACCGGAACCTCCGATGGT  
CAGTGTGGATTTCGAGCCTGATGGTTCGAGCCGAACCTTGCAGCCGAGATGCTAAACGTATTCTCGCAGTGACCCAGAA  
GGGTGACGCATGGATTTCGTGCGTTACAGGATACTATTTCGTGAACGCAACGTAAGTAGGAAATCAAGTAAGGAGGCA  
ATGTGTCTACTCAATCCAATCGTAATGCGCTCGTAGTGGCGCAACTGAAAGGAGACTTCGTGGCGTTTCTATTCTGT  
TTATGGAAGGCATTAACCTACCCTGCCCCACTAAGTGTGAGTGTGACATGGCTAAGGTGCTGGCGAATGGAGACAA  
CAAGAAGTTTACTTACAGGCTTTCCGTGGTATCGGTAAGTTCGTTTATCACATGTGCGTTTCTGTTGTGGTCTTTAT  
GGAGAGCCCTCAGTTGAAGATACTTATCGTATCAGCCTCTAAGGAGCGTGCAGACGCTAACTCCATCTTTATTAAG  
AACATCATTGACCTGCTGCCATTCTATCTGAGTTAAAGCCAAGACCCGGACAGCGTACTCGGTAATCAGCTTTGA  
TGTAGGCCAGCCAATCCTGACCCTCTCCTAGTGTGAAATCAGTAGGTATCACTGGTCAAGTAACTGGTAGCCGTG  
CTGACATTATCATTGCGGATGACGTTGAGATTCCGTCTAACAGCGCAACTATGGGTGCCCGTGAGAAGCTATGGACT  
CTGGTTCAGGAGTTCGCTGCGTTACTTAAACCGCTGCCTTCTCTCGCGTTATCTACCTTGGTACACCTCAGACAGA  
GATGACTCTCTATAAGGAACCTTGGAGATAACCGTGGGTACACAACCATTATCTGGCCTGCTCTGTACCCAAGGACAC  
GTGAAGAGAACCTCTATTACTCACAGCGTCTTGTCTCTATGTTACGCGCTGAGTACGATGAGAACCCTGAGGCACTT  
GCTGGGACTCCAACAGACCCAGTGCCTTTGACCGTGTGACCTGCGCGAGCGTGTGAGTTGGAATACGGTAAGGCTGG  
CTTTACGCTACAGTTTATGCTTAAACCCTAACCTTAGTGTGATGCCGAGAAGTACCCGCTGAGGCTTCGTGACGCTATCG  
TAGCGGCCCTTAGACTTAGAGAAGGCCCAATGCATTACCAGTGGCTTCCGAACCGTCAAGAACATCATTGAGGACCTT  
CCTAACGTTGGCCTTAAGGGTGTGACCTGCATACGTACCACGATTGTTCCAACAACCTCAGGTGAGTACCAACAGAA  
GATTCTGGTCAATTGACCCTAGTGGTTCGCGGTAAGGACGAAACAGGTTACGCTGTGCTGTACACACTGAACGGTTACA  
TCTACCTTATGGAAGCTGGAGGTTTCCGTGATGGCTACTCCGATAAGACCCCTTGAGTTACTCGCTAAGAAGGCAAG  
CAATGGGGAGTCCAACCGGTTGTCTACGAGAGTAACTTCGGTGCAGGATGTTCCGGTAAGGTATTAGTCTCTATCCT  
TCTTAAACACCACAACCTGTGCGATGGAAGAGATTTCGTGCCCCGTGGTATGAAAGAGATGCGTATTTGCGATACCCTTG  
AGCCAGTCAATGCAGACTCACCGCCTTGTAAATTCGTGATGAGGTCATTAGGGCCGACTACCAGTCCGCTCGTGACGTA  
GACGGTAAGCATGACGTTAAGTACTCGTTGTTCTACCAGATGACCCGATCACTCGTGAGAAAGGCGCTCTGGCTCA  
TGATGACCGATTGGATGCCCTTGCCTTAGGCATTGAGTATCTCCGTGAGTCCATGCAGTTGGATTCCGTTAAGGTCG  
AGGGTGAAGTACTTGTGACTTCTTGGAGAACACATGATGCGTCTACGGTTGCTGCTACGCATATCATTGAGATG  
TCTGTGGGAGGAGTTGATGTGACTCTGAGGACGATGAGGGTTACGGTACGTCTTTTATTGAGTGGTATTATGCA  
TTAGGACTGCATAGGGATGCACTATAGACCACGGATGGTCAAGTCTTTAAGTTACTGAAAAGACACGATAAAATTAAT  
ACGACTCACTATAGGGAGAGGAGGGACGAAAGGTTACTATATAGATACTGAATGAATACTTATAGAGTGCATAAAGT  
ATGCATAATGGTGTACCTAGAGTGACCTCTAAGAATGGTGATTATATTGTATTAGTATCACCTTAACTTAAGGACCA  
ACATAAAGGGAGGAGACTCATGTTCCGCTTATTGTTGAACCTACTGCGGCATAGAGTACCTACCATTCTTGTGG  
TACTTTGTGCTGCCCTTGGGTACGCATCTCTTACTGGAGACCTCAGTTCACTGGAGTCTGTGCTTGTCTATACTC  
ACTTGTAGCGATTAGGGTCTTCTGACCGACTGATGGCTCACCGAGGATTACGCGGTATGATTGCATCACACCACT  
TCATCCCTATAGAGTCAAGTCTGAGGTATACCATAAAGAGCCTCTAATGGTCTATCCTAAGGTCTATACCTAAAG  
ATAGGCCATCCTATCAGTGTACCTAAGAGGGTCTTAGAGAGGGCCTATGGAGTTCCTATAGGGTCTTTAAATA

TACCATAAAAAATCTGAGTGACTATCTCACAGTGTACGGACCTAAAGTTCCTCCCATAGGGGGTACCTAAAGCCCAGCC  
AATCACCTAAAGTCAACCTTCGGTTGACCTTGAGGGTTCCTAAGGGTGGGGATGACCCTTGGGTTTTGTCTTTGGG  
TGTTATTTAAACATAAAGACCAGACCTAAAGACCAGACCTAAAGACACTACATAAAGACCAGACCTAAAGACGCCTT  
GTTGTTAGCCATAAAGTGATAACCTTTAATCATTGTCTTTATTAATACAACCTCACTATAAGGAGAGACAACCTTAAAG  
AGACTTAAAGATTAATTTAAAATTTATCAAAAAGAGTATTGACTTAAAGTCTAACCTATAGGATACTTACAGCCAT  
CGAGAGGGACACGGCGAATAGCCATCCCAATCGACACCGGGGTCAACCGGATAAGTAGACAGCCTGATAAGTCGCAC  
GACAGAAAGAAATTGACCGCGCTAAGGCCCGTAAAGAACGTCACGAGGGGGCGCTTAGAGGCACGCAGATTCAAACGT  
CGCAACCGCAAGGCACGTAAAGCACACAAAGCTAAGCGCGAAAGAATGCTTGCTGCGTGGCGATGGGCTGAACGTCA  
AGAACGGCGTAACCATGAGGTAGCTGTAGATGTACTAGGAAGAACCAATAACGCTATGCTCTGGGTCAACATGTTCT  
CTGGGGACTTTAAGGCGCTTGAGGAACGAATCGCGCTGCCTGGCGTAATGCTGACCGGATGGCTATCGCTAATGGT  
CTTACGCTCAACATTGATAAAGCAACTTGACGCAATGTTAATGGGCTGATAGTCTTATCTTACAGGTCACTGCGGGT  
GGCCTGAATAGGTACGATTTACTAAGTGAAGAGGCCTAAATGAACACGATTAACATCGCTAAGAACGACTTCTCT  
GACATCGAAGTGGCTGCTATCCCGTTCAACACTCTGGCTGACCATTACGGTGAGCGTTTAGCTCGCGAACAGTTGGC  
CCTTGAGCATGAGTCTTACGAGATGGGTGAAGCACGCTTCCGCAAGATGTTTGAGCGTCAACTTAAAGCTGGTGAGG  
TTGCGGATAACGCTGCCGCCAAGCCTCTCATCACTACCCTACTCCCTAAGATGATTGCACGCATCAACGACTGGTTT  
GAGGAAGTGAAAGCTAAGCGCGGCAAGCGCCCGACAGCCTTCCAGTTTCTGCAAGAAATCAAGCCGGAAGCCGTAGC  
GTACATCACCATTAAGACCCTCTGGCTTGCCCTAACCAGTGTGACAATACAACCGTTCAGGCTGTAGCAAGCGCAA  
TCGGTTCGGGCCATTGAGGACGAGGCTCGCTTCGGTTCGTATCCGTGACCTTGAAGCTAAGCACTTCAAGAAAAACGTT  
GAGGAACAACCTCAACAAGCGCTAGGGCACGTCTACAAGAAAGCATTATGCAAGTTGTCGAGGCTGACATGCTCTC  
TAAGGGTCTACTCGGTGGCGAGGCGTGGTCTTCGTGGCATAAGGAAGACTCTATTTCATGTAGGAGTACGCTGCATCG  
AGATGCTCATTGAGTCAACCGGAATGGTTAGCTTACACCGCCAAAATGCTGGCGTAGTAGGTCAAGACTCTGAGACT  
ATCGAAGTTCGCACCTGAATACGCTGAGGCTATCGCAACCCGTGCAGGTGCGCTGGCTGGCATCTCTCCGATGTTCCA  
ACCTTGCGTAGTTTCTCCTAAGCCGTGGACTGGCATTACTGGTGGTGGCTATTGGGCTAACGGTCGTCGCTCTCTGG  
CGCTGGTGCCTACTCACAGTAAGAAAGCACTGATGCGCTACGAAGACGTTTACATGCCTGAGGTGTACAAAGCGATT  
AACATTGCGCAAAAACCCGCATGGAAAATCAACAAGAAAGTCTTAGCGGTTCGCCAACGTAATCACCAAGTGGAAAGCA  
TTGTCCGGTTCGAGGACATCCCTGCGATTGAGCGTGAAGAACTCCCGATGAAACCGGAAGACATCGACATGAATCCTG  
AGGCTCTCACCGCGTGGAAACGTGCTGCCGCTGCTGTGTACCAGCAAGGACAAGGCTCGCAAGTCTCGCCGTATCAGC  
CTTGAGTTTCATGCTTGAGCAAGCCAATAAGTTTGTCTAACCTAAGGCCATCTGGTTCCCTTACAACATGGACTGGCG  
CGGTGCTGTTTACGCTGTGTCAATGTTCAACCCGCAAGGTAACGATATGACCAAGGACTGCTTACGCTGGCGAAAG  
GTAAACCAATCGGTAAGGAAGGTTACTACTGGCTGAAAATCCACGGTGCAAACTGTGCGGGTGTGATAAGGTTCCG  
TTCCCTGAGCGCATCAAGTTCATTGAGGAAAACCACGAGAATCATGGCTTGCCTAAGTCTCCACTGGAGAACAC  
TTGGTGGGCTGAGCAAGATTCTCCGTTCTGCTTCCCTGCGTTCTGCTTTGAGTACGCTGGGGTACAGCACCACGGCC  
TGAGCTATAACTGCTCCCTTCCGCTGGCGTTTGACGGGTCTTGCTCTGGCATCCAGCACTTCTCCGCGATGCTCCGA  
GATGAGGTAGGTGGTTCGCGCGGTTAACTTGCTTCCCTAGTGAACCGTTCAGGACATCTACGGGATTGTTGCTAAGAA  
AGTCAACGAGATTCTACAAGCAGACGCAATCAATGGGACCGATAACGAAGTAGTTACCGTGACCGATGAGAACACTG  
GTGAAATCTCTGAGAAAGTCAAGCTGGGCCTAAGGCCTGGCTGGTCAATGGCTGGCTTACGGTGTACTCGCAGT  
GTGACTAAGCGTTCAGTCATGACGCTGGCTTACGGGTCCAAAGAGTTCGGCTTCCGTCAACAAGTGTGGAAGATAC  
CATTACGCCAGCTATTGATTCCGGCAAGGGTCTGATGTTCACTCAGCCGAATCAGGCTGCTGGATACATGGCTAAGC  
TGATTTGGGAATCTGTGAGCGTGACGGTGGTAGCTGCGGTTGAAGCAATGAACTGGCTTAAAGTCTGCTGCTAAGCTG  
CTGGCTGCTGAGGTCAAAGATAAGAAGACTGGAGAGATTCTTCGCAAGCGTTGCGCTGTGCATTGGGTAACCTCTGA  
TGGTTTTCCCTGTGTGGCAGGAATACAAGAAGCCTATTACAGACGCGCTTGAACCTGATGTTCCCTCGGTGAGTTCCGCT  
TACAGCCTACCATTAACACCAACAAAGATAGCGAGATTGATGCACACAAACAGGAGTCTGGTATCGCTCCTAACTTT  
GTACACAGCCAAGACGGTAGCCACCTTCGTAAGACTGTAGTGTGGGCACACGAGAAGTACGGAATCGAATCTTTTGC  
ACTGATTACGACTCCTTCGGTACCATTCCGGCTGACGCTGCGAACCTGTTCAAAGCAGTGCGCGAAACTATGGTTG  
ACACATATGAGTCTTGTGATGTACTGGCTGATTTCTACGACCAGTTCGCTGACCAGTTGCACGAGTCTCAATTGGAC  
AAAATGCCAGCACTTCCGGCTAAAGGTAACCTGAACTTCCGTGACATCTTAGAGTCCGACTTCGCGTTCGCGTAACG  
CCAAATCAATACGACTCACTATAGAGGGACAAACTCAAGGTCATTTCGCAAGAGTGGCCTTTATGATTGACCTTCTTC  
CGGTTAATACGACTCACTATAGGAGAACCTTAAAGTTTAACTTTAAGACCCTTAAAGTGTAAATTAGAGATTTAAATT  
AAAGAATTAATAAGAGAGGACTTTAAGT

>NRG-P0099

ATGCGTAACTTCGAAAAGATGACCAAACGTTCTAACCGTAATGCTCGTGACTTCGAGGCAACCAAAGGTGCGAAGTT  
GAATAAGACTAAGCGTGACCGCTCTCACAAGCGTAGCTGGGAGGGTTCAGTAAGATGGGACGTTTTATATAGTGGTAAT  
CTGGCAGCATTCAAGGCAGCAACAAACAAGCTGTTCCAGTTAGACTTAGCGGTCAATTTATGATGACTGGTATGATGC  
CTATAACAAGAAAAGATTGCATACGGTTACGTATTGAGGACAGGAGTGGAAACCTGATTGATACTAGCACCTTCTACC  
ACCACGACGAGGACGTTCTGTTCAATATGTGTACTGATTGGTTGAACCATATGTATGACCAGTTGAAGGACTGGAAG  
TAATACGACTCAGTATAGGACAATGCTTAAAGTTCGCTCTTAGGAGTGGCCTTAGTCATTTAACCAATAGGAGATA

AACATTATGATGAACATTAAGACTAACCCTGTTTAAAGCCGTGTCTTTTCGTAGAGTCTGCCATTAAGAAGGCTCTGGA  
TAACGCTGGGTATCTTATCGCTGAAATCAAGTACGATGGTGTACGCGGGAACATCTGCGTAGACAATACTGCTAACA  
GTTACTGGCTCTCTCGTGTATCTAAAACGATTCCGGCACTGGAGCACTTAAACGGGTTTGATGTTTCGCTGGAAGCGT  
CTACTGAACGATGACCGTTGCTTCTACAAAGATGGCTTTATGCTTGATGGGGAACCTCATGGTCAAGGGCGTAGACTT  
TAACACAGGGTCCGGCCTACTGCGTACCAAATGGACTGACACGAAGAACCAAGAGTTCATGAAGAGTTATTCGTTG  
AACCAATCCGTAAGAAAGATAAAGTTCCTTTAAAGCTGCACACTGGACACCTTACATAAAAATGTACGCTATCCTC  
CCGCTGCACATCGTGGAGTCTGGAGAAGACTGTGATGTCATGACGTTGCTCATGCAGGAACACGTTAAGAACATGCT  
GCCTCTGCTACAGGAATACTTCCCTGAAATCGAATGGCAAGCGGCTGAATCTTACGAGGTCTACGATATGGTAGAAC  
TACAGCAACTGTACGAGCAGAAGCGGAGCAGAAGGCCATGAGGGTCTCATTGTGAAAGACCCGATGTGTATCTATAAG  
CGCGTAAGAAATCTGGCTGGTGGAAAATGAAACCTGAGAACGAAGCTGACGGTATCATTACGGGCTGGTATGCGG  
TACAAAAGGCTCGCTAATGAAGTAAAGTATTGGTTTTGAGGTGCTTCTTGAGAGTGGTCTGTTAGTTAACGCCA  
CGAATATCTCTCGCCTTAATGGATGAGTTCCTGAGACAGTAAAAGAGGCCACCCTAAGTCAATGGGGATTCTTT  
AGCCCATACGGTATTGGCGACAACGATGCTTGTACTATTAACCTTACGATGGCTGGGCGTGTCAAATTAGCTACAT  
GGAGGAAACACCTGATGGCTCTTTGCGGCACCCATCGTTTCGTAATGTTCCGTGGCACCCGAGGACAACCCTCAAGAGA  
AAATGTAATCACACTGGCTCACCTTCGGGTGGGCCTTTCTGCGTTTATAAGGAGACACTTTATGTTTAAAGAAGGTTG  
GTAAATTCCTTGGCGCTTTGGCAGCTATCCTGACGCTTGCCTATATTCTTGGCGTATACCCTCAAGTAGCACTAGTA  
GTAGTTGGCGCTTGTACTTAGCGGCAGTGTGTGCTTGCCTGTGGAGTATAGTTAACTGGTAATACGACTCACTAAA  
GGAGGTACACACCATGATGTACTTAATGCCATTACTCATCGTCATTGTAGGATGCCTTGGCGCTCCACTGTAGCGATG  
ATGATATGCCAGATGGTCACGCTTAATACGACTCACTAAAGGAGACACTATATGTTTCGACTTCATTACAACAAAAG  
CGTTAAGAATTTACGGTTCCCGTGCTGACCGTTCAATCGTATGTGCGAGCGAGCGCCGAGCTAAGATACCTCTTA  
TTGGTAACACAGTTCCTTTGGCACCGAGCGTCCACATCATTATCACCCGTGGTGACTTTGAGAAAGCAATAGACAAG  
AAACGTCCGGTCTTAGTGTGGCAGTGACCCGCTTCCCGTTCGTCCGTCTGTTACTCAAACGAATCAAGGAGGTGTT  
CTGATGGGACTGTTAGATGGTGAAGCCTGGGAAAAAGAAAACCCGCCAGTACAAGCAACTGGGTGTATAGCTTGCTT  
AGAGAAAGATGACCGTTATCCACACACCTGTAACAAAGGAGCTAACGATATGACCGAACGTGAACAAGAGATGATCA  
TTAAGTTGATAGACAATAATGAAGGTCGCCCAGATGATTTGAATGGCTGCGGTATTCTCTGCTCCAATGTCCCTTGC  
CACCTCTGCCCCGCAAATAACGATCAAAAAGATAACCTTAGGTGAAATCCGAGCGATGGACCCACGTAACCACATCT  
GAATAAACCTGAGGTAACCTACAGATGACCAAGCCTTCCGCTGAGACAATCGAAGGTGTCACTAAGCCTTCCCCT  
ACATGCTGTTTGCAGACATTGAGGCTATCGAAGTGATTGCTCGTTCAATGACCGTTGAGCAGTTCAAGGATACCTGC  
TTCGGTAACACTTAAAGTACAGACTACGTGCTGTTGTAAGAAGTCAGAGTTAGCGTACTTAGAGAAAAGACCTAGCGAA  
AGCAGACTTCTATAAAGAACTCTTTGAGAAACATAAGGATAAATGTTATGCATAACTTCAAGTCAACCCACCTGCC  
GACAGCCTATCTGATGACTTACATCTTGTCTCAGAGTGGTGCCGAAAGATGTGGGAAGAGACATTGACGATGCGTA  
CATCAAGCTGTATGAACTTTGGAAATCGAGAGGTCAATGACTATGTCAAACGTAAATACAGGTTCACTTAGTGTGGA  
CAATAAGAAGTTTTGGGCTACCGTAGAGTCTCGGAGCATTCTTCCGAGGTTCCAATCTACGCTGAGACCCCTAGACG  
AAGCTCTGGAGTTAGCCGAATGGCAATACGTTCCGGCTGGCTTTGAGGTTACTCGTGTGCGTCTTGTGTAGCACCG  
AAGTAATACGACTCACTATTAGGGAAGACTCCCTCTGAGAAACCAAACGAAACCTAAAGGAGATTAACATTATGGCT  
AAGAAGATTTTACCTCTGCGCTGGGTACCGCTGAACCTTACGCTTACATCGCCAAGCCGGACTACGGCAACGAAGA  
GCGTGGCTTTGGGAACCCCTCGTGGTGTCTATAAAGTTGACCTGACTATTCCCAACAAAGACCCGCGCTGCCAGCGTA  
TGGTCGATGAAATCGTGAAGTGTACGAAGAGGCTTATGCTGCTGCCGTTGAGGAATACGAAGCTAATCCACCTGCT  
GTAGCTCGTGGTAAGAAACCGCTGAAACCGTATGAGGGTGACATGCCGTTCTTTCGATAACGGTGACGGTACGACTAC  
CTTTAAGTTCAAATGCTACGCGTCTTTCCAAGACAAGAAGACCAAAGAGACCAAGCACATCAATCTGGTTGTGGTTG  
ACTCAAAGGTAAGAAGATGGAAGACGTTCCGATTATCGGTGGTGGCTCTAAGCTGAAAGTTAAATATTCTCTGGTT  
CCATACAAGTGGAACACTGCTGTAGGTGCGAGCGTTAAGCTGCAACTGGAATCCGTGATGCTGGTGAAGTGGCTAC  
CTTTGGTGGCGGTGAAGACGATTGGGCTGACGAAGTTGAAGAGAACGGCTATGTTGCCTCTGGTTCTGCCAAAGCGA  
GCAAACCACGCGACGAAGAAAGCTGGGACGAAGACGACGAAGAGTCCGAGGAAGCAGACGAAGACGGGACTTCTAA  
GTGGAACCTGCGGGGAGAAAATCCTTGGAGCAATCAAGGTGACTTCCCTCTGGGTGTTGGGAGTGGCAGGGCGCTACGAA  
CAATAAAGGTTACGGGCAGGTGTGGTGCAGCAATACCGGAAAGGTTGTCTACTGTCTATCGCGTAATGTCTAATGCTC  
CGAAAGGTTCTACCGTCTGCACTCCTGTGATAATCCATTATGTTTGAACCTGAACACCTATCCATAGGAACTCCA  
AAAGAGAATCCACTGACATGGTAAATAAGGGTGCCTCACACAAGGGGTATAAACTTTGAGACGAAGACGTAATGGC  
AATCATGGAGTCCAGCGAGTCCAATGTATCCTTAGCTCGCACCTATGGTGTCTCCCAACAGACTATTTGTGATATAC  
GCAAAGGGAGGCGACATGGCAGGTTACGGCGCTAAAGGAATCCGAAAGGTTGGAGCGTTTTGCTCTGGCCTAGAGGA  
CAAGTTTTCAAAGCAGTTGGAATCAAAGGTTAAATTCGAGTATGAAGAGTGGAAAGTGCCTTATGTAATTCGGG  
CGAGCAATCACACTTACACTCCAGACTTCTTACTTCCAAACGGTATATTTCGTTGAGACAAAGGGTCTGTGGGAAAGC  
GATGATAGAAAGAAGCACTTATTAATTAGGGAGCAGCACCCCGAGCTAGACATCCGTATTGTCTTCTCAAGCTCACG  
TACTAAGTTATACAAAGGTTCTCCAACGTCTTATGGAGAGTCTGCGAAAAGCATGGTATTAAGTTCGCTGATAAAC  
TGATACCTGCTGAGTGGATAAAGGAACCCAAGAAGGAGTCCCCTTTGATAGATTAAGAAGGAAAGGAGGAAAGAAA  
TAATGGCTCGTGTACAGTTTTAAACAACGTGAATCTACTGACGCAATCTTTGTTCACTGCTCGGCTACCAAGCCAAGT  
CAGAATGTTGGTGTCCGTGAGATTCCGAGTGGCACAAGAGCAGGGTTGGCTCGATGTGGGATACCACCTTTATCAT



AAGAAGCCTAAGAACAAGGCACAGCGAGAAGGCCGTGAGCCTTGCGAACTTGATACCCGCGAGTACGTTGCTGGTGCTC  
TCCTTACACCCCAGTTGAACATGTTGTGTTAAACCCCTTCGTCTCGTGACCACATTCAGAAGAACTCCAAGAGGCTG  
GGTGGGTCCCAGCAAGTACACCGATAAGGGTGTCTCTGTGGTGGACGATGAGGTACTCGAAGGAGTACGTGTAGAT  
GACCCTGAGAAGCAAGCCGCTATCGACCTCATTAAAGAGTACTTGATGATTGAGAAGCGAATCGGACAGTCTGCTGA  
GGGAGACAAAGCATGGCTTCGTTATGTTGCTGAGGATGGTAAGATTTCATGGTTCTGTAAACCCTAATGGAGCAGTTA  
CGGGTGTGCGACCCATGCGTTCCCAAACCTTGCGCAAATTCGGGTGTACGTTCTCCTTATGGAGAGCAGTGTGCG  
GCTGCTTTTGGCGCTGAGCACCATTTGGATGGGATAACTGGTAAGCCTTGGGTTCAGGCTGGCATCGACGCATCCGG  
TCTTGAGCTACGCTGCTTGGCTCACTTCATGGCTCGCTTTGATAACGGCGAGTACGCTCACGAGATTCTTAACGGCG  
ACATCCACACTAAGAACCAGATAGCTGCTGAACTACCTACCCGAGATAACGCTAAGACGTTTCATCTATGGGTTCCCTC  
TATGGTGTGGTGTATGAGAAGATTGGACAGATTGTTGGTGTGGTAAAGAGCGCGGTAAGGAATCAAGAAGAAAT  
CCTTGAGAACACCCCGCGATTGCGACTCCGCGAGTCTATCCAACAGACACTTGTGAGTCTCAATGGGTAG  
CTGGTGAGCAACAAGTCAAGTGGAAACGCCGCTGGATTAAAGGTCTGGATGGTTCGTAAGGTACACGTTTCGTAGTCTC  
CACGCTGCCTTGAATACCCTACTGCAATCTGCTGGTGTCTCATCTGCAAACCTGTGGATTATCAAGACCGAAGAGAT  
GCTCGTAGAGAAAGGCTTGAAGCATGGCTGGGATGGGGACTTTGCGTACATGGCATGGGTACATGATGAAATCCAAG  
TAGGCTGCCGTACCGAAGAGATTGCTCAGGTGGTCATTGAGACCCGACAAAGAAGCGATGCGCTGGGTGGAGACCAC  
TGGAACCTCCGGTGTCTTCTGGATAACCGAAGGTAAGATGGGTCTAATTGGGCGATTTGCCACTGATACAGGAGGCT  
ACTCATGAACGAAAGACACTTAACAGGTGCTGCTTCTGAAATGCTAGTAGCCTACAAATTTACCAAAGCTGGGTACA  
CTGTCTATTACCCTATGCTGACTCAGAGTAAAGAGGACTTGGTTGTATGTAAGGATGGTAAATTTAGTAAGGTTTCAG  
GTTAAAACAGCCACAACGGTTCAAACCAACACAGGAGATGCCAAGCAGGTTAGGCTAGGTGGATGCGGTAGGTCCGA  
ATATAAGGATGGAGACTTTGACATTCTTGGCGTTGTGGTTGACGAAGATGTGCTTATTTTTCACATGGGACGAAGTAA  
AAGGTAAGACATCCATGTGTGTGCGCAAGAGAAACAAAGGCATAAAACTATAGGAGAAATTTATTATGGCTATGACAA  
AGAAATTTAAAGTGTCTTTCGACGTTACCGCAAAGATGTGCTGCTGACGTTACGGCAATCTTAGAGAAAGATATGCTG  
CATCTATGTAAGCAGGTCCGGCTCAGGTGCGATTGTCCCAATGGTAAACAGAAGGAAATGATTGTCCAGTTCCCTGAC  
ACACGGTATGGAAGGATTGATGACATTTCGTAGTACGTACATCATTTCGTGAGGCCATTAAGGACATGCACGAAGAGT  
ATGCAGATAAGGACTCTTTCAAACAATCTCCTGCAACAGTACGGGAGGTGTTCTGATGTCTGACTACCTGAAAGTGC  
TGCAAGCAATCAAAAGTTGCCCTAAGACTTTCCAGTCCAACATATGTACGGAACAATGCGAGCCTCGTAGCGGAGGCC  
GCTTCCCGTGGTCACATCTCGTGCCTGACTACTAGTGGACGTAACGGTGGCGCTTGGGAAATCACTGCTTCCGGTAC  
TCGCTTTCTGAAACGAATGGGAGGATGTGTCTAATGTCTCGTACCTTGTGACTATTCCACGCGATGTGTGGAACGA  
TATACAGGGCTACATCGACTCTCTGGAACGTGAGAACGATAGCCTTAAGAATCAACTAATGGAAGCTGACGAATACG  
TAGCGGAAGTACAGGAGAACTTAATGGCACTTCTTACCTTAAACAATTTCTATGAGTTACGTGAAGGCTGCGACGA  
CAAGGGTATCCTTGTGATGGACGGCGACTGGCTGGTCTTCCAAGCTATGAGTGCTGCTGAGTTTGTGCTCTTGGG  
AGGAAGAGATTTGGCACCGATGCTGTGACCACGCTAAGGCCCGTACAGATTCTTGAGGATTCCATTAAGTCCCTACGAG  
ACCCGTAAGAAGGCTTGGGCAGGTGCTCCAATTGTCCTTGCCTTACCGATAGTGTTAACTGGCGTAAAGAAGTGGT  
TGACCCGAACATAAGGCTAACCCTAAGGCCGTGAAGAAACCTGTAGGGTACTTTGAGTTCCTTGTGCTCTCTTTG  
AGCGCGAAGAGTTCTATTGCATCCGTGAGCCTATGCTTGGGGTGTGACGTTATGGGAGTTATTGCTTCCAATCCG  
TCTGCCTTCGGTGTCTGTAAGGCTGTAATCATCTCTTGGGATAAGGACTTTAAGACCATCCCTAACTGTGACTTCT  
GTGGTGTACCCTGGTAACATCCTGACTCAGACCGAAGAGTCCGCTGACTGGTGGCACCTCTTCCAGACCATCAAGG  
GTGACATCACTGATGGTTACTCAGGGATTGCTGGATGGGGTGATACCGCCGAGGACTTCTTGAATAACCCGTTTATA  
ACCGAGCCTAAAACGTCTGTGCTTAAGTCCGGTAAGAACAAGGCCAAGAGGTTACTAAATGGGTAAACCGCAGCC  
TGAGCCTCATGAGACGCTTTGGGACTGCATTAAGTCCATTGGCGCAAGGCTGGTATGACCGAAGAGGATATTATCA  
AGCAGGGCCAAATGGCTCGAATCCTACGGTTCAACGAGTACAACCTTTATTGACAAGGAGATTTACCTGTGGAGACCG  
TAGCGTATATTGGTCTGGGTCTTTGTGTTCTCGGAGTGTGCCTCATTTCGTGGGGCCTTTGGGACTTAGCCAGAATA  
ATCAAGTCTTACACGACACTAAGTGATAAACTCAAGGTCCCTAAATTAATACGACTCACTATAGGGAGATAGGGGC  
CTTTACGATTATTACTTTAAGATTTAACTCTAAGAGGAATCTTTATTATGTTAACACCTATTAACCAATTACTTAAG  
AACCTAACGATATTCCAGATGTACCTCGTGCAACCCTGAGTATCTACAGGTTTCGATTCAACTATGCGTACCTCGA  
AGCGTCTGGTCCATATAGGACTTATGCGTGTCTAATGGTGTAGTGGGCCCACATCTTGGGTTTTCATTACGGCCCTAC  
AGTATGCCTCTAACGTCAATTGACGAGATTGAGTTACGCAAGGAACAACATAAGAGATGATGGGGAGGATTGACACTAT  
GTGTTTCTCACCGAAAATTTAAACTCCGAAGATGGATAACCAATCAGATTTCGAGCCGTTGAGCCAGCGCCTCTGACCC  
AAGAAGTGTCAAGCGTGGAGTTCCGGTGGGTCTTCTGATGAGACGGATACCGAGGGCACCGAAGTGTCTGGACGCAAA  
GGCCTCAAGGTGCAACGTGATGATTCCGTAGCGAAGTCTAAAGCCAGCGGCAATGGCTCCGCTCGTATGAAATCTTC  
CATCCGTAAGTCCGCATTTGGAGGTAAGAAGTGTGCTGAGTTCACATGTGTGGAGGCTAAGAGTCGCTTCCGTGC  
AATCCGGTGGACTGTGGAACACCTTGGGTGCTTAAAGGATTTCGAAGGACACTTTGTGGGCTACAGCCTCTACGTAG  
ACGAAGTGTGACATGTCTGGTTGCCGTGAAGAGTACATTCTGGACTCTACCGGAAAACATGTAGCGTACTTCCGCG  
TGGTGCCTAAGCTGTGACATTACCACAAAGGAGACATTCTGGATGTAACGTCCGTTGTCTAATCCTGAGGCAGA  
CTCTAAGGGCTTACAGCGATTCTAGCGAAACGCTTTAAGTACCTTGCGGAACCTCCAGATTGCGATTGGGTGTCTC  
GTTGTAAGCATGAAGGCGAGACAATGCGTGTATACTTTAAGGAGGTATAAGTTATGGGTAAGAAGTTAAGAAGGCC  
GTGAAGAAGTACCAAGTCCGTTAAGAAAGTCGTTAAGGAAGGGGCTCGTCCGGTTAAACAGGTTGCTGGCGGTCT

AGCTGGTCTGGCTGGTGGTACTGGTGAAGCACAGATGGTGGAAAGTACCACAAGCTGCCGCACAGATTGTTGACGTAC  
CTGAGAAAGAGGTTTTCCACTGAGGACGAAGCACAGACAGAAAGCGGACGCAAGAAAGCTCGTGCTGGCGGTAAGAAA  
TCCTTGAGTGTAGCCCGTAGCTCCGGTGGCGGTATCAACATTTAATCAGGAGGTTATCGTGGAAGACTGCATTGAAT  
GGACCGGAGGTGTCAACTCTAAGGGTTATGGTCGTAAGTGGGTTAATGGTAAACTTGTGACTCCACATAGGCACATC  
TATGAGGAGACATATGGTCCAGTTCCAAACAGGAATTGTGGTGTATGCATATCTGCGATAACCCTAGGTGCTATAACAT  
AAAGCACCTTACGCTTGGAACTCCAAAGGATAATTCCGAGGACATGGTTACCAAAGGTAGACAGGCTAAAGGAGAGG  
AACTAAGCAAGAACTTACAGAGTCAGACGTTCTCGCTATACGCTCTTCAACCTTAAGCCACCGCTCCTTAGGAGAA  
CTGTATGGAGTCAGTCAATCAACCATAACGCGAATACTACAGCGTAAGACATGGAGACACATTTAATGGCTGAGAAA  
CGAACAGGACTTGCGGAGGATGGCGCAAAGTCTGTCTATGAGCGTTTTAAAGAACGACCGTGCTCCCTATGAGACACG  
CGCTCAGAATTGCGCTCAATATACCATCCCATTGTTCCCTAAGGACTCCGATAACGCCTCTACAGATTATCAAA  
CTCCGTGGCAAGCCGTGGGCGCTCGTGGTCTGAACAATCTAGCCTTAAGCTCATGTGGCTCTATTCCCTATGCAG  
ACTTGGATGCGACTTACTATATCTGAATATGAAGCAAAGCAGTTACTGAGCGACCCCGATGGACTCGTAAGGTGCA  
TGAGGGCCTCTCGATGGTAGAGCGTATCATCATGAACTACATTGAGTCTAACAGTTACCGCGTGACTCTCTTTGAGG  
CTCTCAAACAGTTAGTCGTAGCTGGTAACGTCCTGCTGTACCTACCGGAACCGGAAGGGTCAAACCTATAATCCCATG  
AAGCTGTACCGATTGTCTTCTTATGTGGTCCAACGAGACGCATTTCGGCAACGTTCTGCAAATGGTGACTCGTGACCA  
GATAGCTTTTGGTGCTCTCCCTGAGGACATCCGTAAGGCTGTAGAAGGTCAAGGTGGTGAGAAGAAAGCTGATGAGA  
CAATCGACGTGTACACTCACATCTATCTGGATGAGGACTCAGGTGAATACCTCCGATACGAAGAGGTGAGGGTATG  
GAAGTCCAAGGCTCCGATGGGACTTATCCTAAAGAGGCTTGCCCATACATCCCGATTCCGATGGTCAGACTAGATGG  
TGAATCCTACGGTCTTTCGTACATTGAGGAATACTTAGGTGACTTACGGTCCCTTGAAAATCTCCAAGAGGCTATCG  
TCAAGATGTCCATGATTAGCTCTAAGGTTATCGGCTTAGTGAATCCTGCTGGTATCACCCAGCCACGCCGACTGACC  
AAAGCTCAGACTGGTGACTTCGTTACTGGTCTGTCAGAAGACATCTCGTTCCTCCAACCTGGAGAAGCAAGCAGACTT  
TACTGTAGCTAAAGCCGTAAGTGACGCTATCGAGGCTCGCCTTTTCGTTTGCCTTTATGTTGAACTCTGCGGTTGAGC  
GTACAGGTGAACGTGTGACCCGCCGAAGAGATTCGGTATGTAGCTTCTGAACTTGAAGATACTTTAGGTGGTGTCTAC  
TCTATCCTTTCTCAAGAATTACAATTGCCTCTGGTACGAGTGCTCTTGAAGCAACTACAAGCCACGCAACAGATTCC  
TGAGTTACCTAAGGAAGCCGTAGAGCCAACCATTAGTACAGGTCTGGAAGCAATTGGTCGAGGACAAGACCTTGATA  
AGCTGGAGCGGTGTGTCACTGCGTGGGCTGCACTGGCACCTATGCGGGACGACCCTGATATTAACCTTGCGATGATT  
AAGTTACGTATTGCCAACGCTATCGGTATTGACACTTCTGGTATTCTACTCACCGAAGAACAGAAGCAACAGAAGAT  
GGCCCAACAGTCTATGCAAATGGGTATGGATAATGGTGTCTGCTGCGCTCAAGGTATGGCTGCACAAGTACAG  
CTTACCTGAGGCTATGGCTGCTGCCGCTGATTCCGTAAGTTTACAGCCGGGAATTTAATACGACTCACTACTAGGGA  
GACCTCATCTTTGAAATGAGCGATGACAAGAGGTTGGAGTCTCGGCTTCTCTGTAGTTCAACTTTAAGGAGACAAT  
AATAATGGCTGAATCTAATGCAGACGTATATGCATCTTTTGGCGTGAACCTCCGCTGTGATGTCTGGTGGTTCCGTTG  
AGGAACATGAGCAGAACATGCTGGCTCTTGATGTTGCTGCCCGTGATGGCGATGATGCAATCGAGTTAGCGTCAGAC  
GAAGTGGAAACAGAACGTGACCTGTATGACAACCTCTGACCCGTTCCGGTCAAGAGGATGACGAAGGCCGATTCCAGGT  
TCGTATCGGTGATGGCTCTGAGCCGACCGATGTGGACACTGGAGAAGAAGGCGTTGAGGGCACCGAAGGTTCCGAAG  
AGTTTACCCCACTGGGCGAGACTCCAGAAGAAGTGGTAGCTGCCTCTGAGCAACTTGGTGAGCACGAAGAGGGCTTC  
CAAGAGATGATTAACATTGCTGCTGAGCGTGGCATGAGTGTGAGACCAATTGAGGCTATCCAGCGTGAGTACGAGGA  
GAACGAAGAGTTGTCCGCCGAGTCTACGCTAAGCTGGCTGAAATTGGCTACACGAAGGCTTTTATTGACTCGTATA  
TCCGTGGTCAAGAAGCTCTGGTGGAGCAGTACGTAACAGTGTGATTGAGTACGCTGGTGGTCTGTAACGTTTTGAT  
GCACTGTATAACCACCTTGAGACGCACAACCCTGAGGCTGCACAGTCTGGATAATGCGTTGACCAATCGTGACTT  
AGCGACCGTTAAGGCTATCATCAACTTGGCTGGTGGTCTCGCGCTAAGGCGTTCCGGTCTGTAAGCCAACCTCGTAGTG  
TGACTAATCGTGCTATTCCGGCTAAACCTCAGGCTACCAAGCGTGAAGGCTTTGCGGACCGTAGCGAGATGATTA  
GCTATGAGTGACCCTCGGTATCGCACAGATGCCAACTATCGTCTGCAAGTCAAGCAGAAAGTAATCGATTCCGAACCT  
CTGATAGACTTCGAAATTAATACGACTCACTATAGGGAGACCACAACGGTTTTCCCCCTAGAAATAATTTTGTTTAAC  
TTTAAAGAAGGAGATATACATATGGCTAGCATGACTGGTGGACAGCAAATGGGTACTAACCAAGGTAAAGGTGTAGTT  
GCTGCTGGAGATAAACTGGCGTTGTTCTTGAAGGTATTTGGCGGTGAAGTCTGACTGCGTTCGCTCGTACCTCCGT  
GACCATTCTCGCCACATGGTACGTTCCATCTCCAGCGGTAATCCGCTCAGTTCCTGTTCTGGGTCGCACTCAGG  
CAGCGTATCTGGCTCCGGGCGAGAACCTCGACGATAAACGTAAGGACATCAAACACACCAGAGAAGGTAATCACCATT  
GACGGTCTCCTGACGGCTGACGTTCTGATTTATGATATTGAGGACGCGATGAACCACTACGACGTTCTGCTCTGAGTA  
TACCTCTCAGTTGGGTGAATCTCTGGCGATGGCTGCGGATGGTGGCGTTCTGGCTGAGATTGCCGGTCTGTGTAACG  
TGGAAAGCAAATATAATGAGAACATCGAGGGCTTAGGTACTGCTACCGTAATTGAGACCACTCAGAACAAGGCCGCA  
CTTACCGACCAAGTTGCGCTGGGTAAGGAGATTATTGCGGCTCTGACTAAGGCTCGTGCGGCTCTGACCAAGAACTA  
TGTTCCGGCTGCTGACCGTGTGTTCTACTGTGACCCAGATAGCTACTCTGCGATTCTGGCAGCACTGATGCCGAACG  
CAGCAAACCTACGCTGCTCTGATTGACCCTGAGAAGGGTTCTATCCGCAACGTTATGGGCTTTGAGGTTGTAGAAGTT  
CCGCACCTCACCGCTGGTGGTGTGGTACCCTCGTGAGGGCACTACTGGTCCAGAAGCACGCTCTTCCCTGCCAATAA  
AGGTGAGGGTAATGTCAAGGTTGCTAAGGACAACGTTATCGGCTGTTTATGCACCGCTCTGCGGTAGGTACTGTTA  
AGCTGCGTGACTTGGCTCTGGAGCGCGCTCGCCGTGCTAACTTCCAAGCGGACCAGATTATCGCTAAGTACGCAATG  
GGCCACGGTGGTCTTCCGCCAGAAGCTGCAGGAGCTGTGCTATTCCAGTCAGGTGTGATGCTCGGGGATCCGAATTC

GAGCTCCGTCTAATACGACTCACTATAGCTAAACATTAATCATTTAAAATAAGGAGGTAAAGCATGAAATATCTTCT  
GCCTACGGCTGCCACGGGTTTTGTTACTGCTTGAGCTCAGCCAGCGGTCGCCATGGTATTACACTGGAGGATTTTTG  
TCGGTGACTGGCGCCAGACTGCTGGATATAATCTTGATCAAGTGCTGGAGCAAGGAGGCGTCTCAAGCCTTTTCCAG  
AATTTAGGTGTTAGCGTCACACCGATTCAACGTATCGTGCTGAGTGGGGAGAACGGCTTAAAAATCGACATCCACGT  
CATCATTCCATATGAAGGGTTGTCAGGGGATCAGATGGGTGAGATTGAAAAGATTTTTAAGGTTGTCTACCCAGTAG  
ACGACCATCACTTCAAGGTTATTTTACACTACGGTACATTAGTAATTGACGGCGTGACTCCTAACATGATTGACTAT  
TTTGGACGCCCCGATGAGGGGATTGCAGTGTTCGACGGCAAGAAGATCACAGTTACGGGGACTCTGTGGAATGGGAA  
TAAAATTATCGACGAGCGTCTGATTAACCCCGATGGCTCTCTGTTGTTCCGTGTCACTATTAACGGTGTACAGGGCT  
GGCGCCTTTGTGAACGCATTTTAGCAGGCTCGAGCGGCCCTACGTGAGTCCGGCCGGTTGCCAAGTTTTATGGGGG  
GTCAACAGTGGAAACACAGGCTTTACGGCGAACGTTACTGTCAAGAACAACAAGCTCCGCTCCTGTGGATGGTTGGAC  
ACTGACCTTTTTCTTTCCCTCAGGTGAGCAAGTGACACAGGCGTGGAGTTCTACGGTTACACAATCTGGTTCTGCTG  
TTACTGTCCGTAACCGCCCTGGAATGGAAGCATCCCAGCGGGCGGGACCGCACAGTTTGGCTTCAATGGCTCTCAT  
ACAGGGACAAACGCAGCACCAACAGCATTTTTCTTGAATGGAACCCCTTGCACTGTTCGGATAAGCTTTCGGCCGCAC  
TCGAGTAACTAGTTAACCCCTTGGGGCCTCTAAACGGGTCTTGAGGGGTTTTTTGCTGAAAGGAGGAACTATATGCG  
CTCATACGATATGAACGTTGAGACTGCCGCTGAGTTATCAGCTGTGAACGACATTCTGGCGTCTATCGGTGAACCTC  
CGGTATCAACGCTGGAAGGTGACGCTAACGCAGATGCAGCGAACGCTCGGCGTATTCTCAACAAGATTAACCGACAG  
ATTCAATCTCGTGGATGGACGTTCAACATTGAGGAAGGCATAACGCTACTACCTGATGTTTACTCCAACCTGATTGT  
ATACAGTGACGACTATTTATCCCTAATGTCTACTTCCGGTCAATCCATCTACGTTAACCGAGGTGGCTATGTGTATG  
ACCGAACGAGTCAATCAGACCGCTTTGACTCTGGTATTACTGTGAACATTATTTCGTCTCCGCGACTACGATGAGATG  
CCTGAGTGCTTCCGTTACTGGATTGTCACCAAGGCTTCCCGTCAGTTCAACAACCGATTCTTTGGGGCACCAGGAGT  
AGAGGGTGTACTCCAAGAAGAGGAAGATGAGGCTAGACGTCTCTGCATGGAGTATGAGATGGACTACGGTGGGTACA  
ATATGCTGGATGGAGATGCGTTCACCTTCTGGTCTACTGACTCGCTAACATTAATAAATAAGGAGGCTCTAATGGCAC  
TCATTAGCCAATCAATCAAGAACTTGAAGGGTGGTATCAGCCAACAGCCTGACATCCTTCGTTATCCAGACCAAGGG  
TCACGCCAAGTTAACGGTTGGTCTTCCGAGACCGAGGGCCTCCAAAAGCGTCCACCTCTTGTTTTTCTTAAATACACT  
TGGAGACAACGGTGCCTTAGGTCAAGCTCCGTACATCCACCTGATTAACCGAGATGAGCACGAACAGTATTACGCTG  
TGTTCACTGGTAGCGGAATCCGAGTGTTCGACCTTTCTGGTAACGAGAAGCAAGTTAGGTATCCTAACGGTCCAAC  
TACATCAAGACCGCTAATCCACGTAACGACCTGCGAATGGTACTGTAGCAGACTATACGTTTCATCGTTAACCGTAA  
CGTTGTTGCGAGAAGAACAACAAGTCTGTCAACTTACCGAATTACAACCCCTAATCAAGACGGATTGATTAACGTTT  
GTGGTGTGACAGTATGGTAGGGAATAATTGTACACATTAACGGTAAAGACGTTGCGAAGTATAAGATAACCGATTGGT  
AGTCAACCTGAACACGTAACAATAACGGATGCCAATGGTTAGCTGAAGAGTTAGCCAAGCAGATGCGCACTAAGT  
GTCTGATTGGACTGTAATGTAGGGCAAGGGTTCATCCATGTGACCGCACCTAGTGGTCAACAGATTGACTCCTTCA  
CGACTAAAGATGGCTACGCAGACAGTTGATTAACCCCTGTGACCCACTACGCTCAGTCGTTCTCTAAGCTGCCACCT  
AATGCTCCTAACGGCTACATGGTGAAAATCGTAGGGGACGCCTCTAAGTCTGCCGACCAGTATTACGTTCCGGTATGA  
CGCTGAGCGGAAAGTTTGGACTGAGACTTTAGGTTGGAACACTGAGGACCAAGTTCTATGGGAAACCATGCCACACG  
CTCTTGTGCGAGCCGCTGACGGTAATTTGACTTCAAGTGGCTTGAGTGGTCTCCTAAGTCTTGTGGTACGTTGAC  
ACCAACCCCTTGGCCTTCTTTTGTGGTTCAAGTATTAACGATGTGTTCTTCTCCGTAACCGCTTAGGATTCTTAG  
TGGGGAGAACATCATATTGAGTCGTACAGCCAAATACTTCAACTTCTACCCTGCGTCCATTGCGAACCTTAGTGATG  
ACGACCCTATAGACGTAGCTGTGAGTACCAACCGAATAGCAATCCTTAAGTACGCCGTTCCGTTCTCAGAAGAGTTA  
CTCATCTGGTCCGATGAAGCACAAATTCGTCTGACTGCCTCGGGTACTCTCACATCTAAGTCGGTTGAGTTGAACCT  
AACGACCCAGTTTACGTAACAGGACCGAGCGAGACCTTTTGGGATTGGGCGTAATGTCTACTTTGCTAGTCCGAGGT  
CCAGCTTACGTCATCCACAGGTAACGCTGTGCAGGATGTGAGTCCGTTAAGAATGCTGAGGACATTACATCA  
CACGTTCCCTAACTACATCCCTAATGGTGTGTTGAGTATTTGCGGAAGTGGTACGGAAAACCTTCTGTTCCGGTACTATC  
TCACGGGGACCCTAGTAAAATCTTCATGTACAAATTCCTGTACCTGAACGAAGAGTTAAGGCAACAGTCGTGGTCTC  
ATTGGGACTTTGGGGAAAACGTACAGGTTCTAGCTTGTGAGATATCAGCTCAGATATGTATGTGATTCTTCGCAAT  
GAGTTCAATACGTTCCCTAGCTAGAATCTCTTCACTAAGAACGCCATTGACTTACAGGGAGAACCCTATCGTGCCTT  
TATGGACATGAAGATTCGATACACGATTCCCTAGTGGAAACATAACAAGATGACACATTCACTACCTCTATTTCATATTC  
CAACAATTTATGGTGCAAACCTTCGGGAGGGGCAAAATCACTGTATTGGAGCCTGATGGTAAGATAACCCGTGTTTGG  
CAACCTACGGCTGGGTGGAATAGCGACCCCTTGGCTGAGACTCAGCGGTAACCTGGAGGGACGCATGGTGTACATTGG  
GTTCAACATTAACCTTCGTATATGAGTTCTCTAAGTTCCTCATCAAGCAGACTGCCGACGACGGGTCTACCTCCACGG  
AAGACATTGGGCGCTTACAGTTACGCCGAGCGTGGGTTAACTACGAGAACTCTGGTACGTTTTGACATTTATGTTGAG  
AACCAATCGTCTAACTGGAAGTACACAATGGCTGGTGCCCGATTAGGCTCTAACACTCTGAGGGCTGGGAGACTGAA  
CTTAGGGACCGGACAATATCGATTCCCTGTGGTTGGTAACGCCAAGTTCAACACTGTATACATCTTGTGAGATGAGA  
CTACCCCTCTGAACATCATTGGGTGTGGCTGGGAAGGTAACACTTACGGAGAAGTTCCGGTATTTAATTAATTAAT  
CTCCCTGTGGTGGCTCGAAATTAATACGACTCACTATAGGGAGAACAATACGACTACGGGAGGGTTTTCTTATGATG  
ACTATAAGACCTACTAAAAGTACAGACTTTGAGGTATTCACTCCGGCTCACCATGACATTCTTGAAGCTAAGGCTGC  
TGGTATTGAGCCGAGTTTTCCCTGATGCTTCCGAGTGTGTACGTTGAGCCTCTATGGGTTCCCTCTAGCTATCGGTG  
GTAACCTGCGGGGACCAGTGTGTTTCGTTACGAGCGACCAAGTGTGGCGACTTAGTGGAAGGCTAAGCGAAAGTTC

CGTAAGTTAATCATGGAGTATCGCGATAAGATGCTTGAGAAGTATGATACTCTTTGGAATTACGTATGGGTAGGCAA  
TACGTCCCACATTTCGTTTCTCAAGACTATCGGTGCGGTATTCCATGAAGAGTACACACGAGATGGTCAATTTTCAGT  
TATTTACAATCACGAAAGGAGGATAACCATATGTGTTGGGCAGCCGCAATACCTATCGCTATATCTGGCGCTCAGGC  
TATCAGTGGTTCAGAACGCTCAGGCCAAAATGATTGCCGCTCAGACCGCTGCTGGTTCGTTCGTAAGCTATGGAAATCA  
TGAGGCAGACGAACATCCAGAATGCTGACCTATCGTTGCAAGCTCGAAGTAAACTTGAGGAAGCGTCCGCCGAGTTG  
ACCTCACAGAACATGCAGAAGGTCCAAGCTATTGGGTCTATCCGAGCGGCTATCGGAGAGAGTATGCTTGAAGGTTT  
CTCAATGGACCGCATTAAGCGAGTACAGAAGGACAGTTTCATTCCGGGAAGCCAATATGGTAACTGAGAACTATCGCC  
GTGACTACCAAGCAATCTTCGCACAGCAACTTGGTGGTACTCAAAGTGTGCAAGTTCAGATTGACGAAATCTATAAG  
AGCGAACAGAAACAGAAGAGTAAGCTACAGATGGTTCCTGGACCCACTGGCTATCATGGGGTCTTCCGCTGCGAGTGC  
TTACGCATCCGGTGCCTTCCACTTAAGTCCACAACATAAGGCACCTATTGTTGCCGCTAAAGGAACCAAGACGGGGA  
GGTAATGAGCTATGAGTAAAATCTGCCCTTCAAGCGGCACAACCGGGACTCTCTCGGTTACGTGGTGGTGGTCT  
GGAGGTATGGGCTATCGTGCAGCAACCACTCAGGCCGAACAGCCAAGGTCAAGCCTATTGGACACCATTGGTTCGGTT  
CGCTAAGGCTGGTGCCGATATGTATACCGCTAAGGAACAACGAGCACGAGACCTAGCTGATGAACGCTCTAACGAGA  
TTATCCGTAAGCTGACCCCTGAGCAACGTCGAGAAGCTCTCAACAACGGGACCCCTTCTGTATCAGGATGACCCATAC  
GCTATGGAAGCACTCCGAGTCAAGACTGGTCGTAACGCTGCGTATCTTGTGGACGATGACGTTATGCAGAAGATAAA  
AGAGGGTGTCTTCCGTAAGCTGCGGAAGAGATGGAAGAGTATCGCCATAGTTCGCCTTCAAGAGGGCGCTAAGGTATACG  
CTGAGCAGTTCGGCATCGACCCTGAGGACGTTGATTATCAGCGTGGTTCACCGGGGACATTACCGAGCGTAACATC  
TCGCTGTATGGTGCATGATAACTTCTTGGCCAGCAAGCTCAGAAGGGCGCTATCATGAACAGCCGAGTGGAACT  
CAACGGTGTCTTCAAGACCCTGATATGCTGCGTTCAGACTCTGCTGACTTCTTTGAGAAGTATATCGACAACG  
GTCTGGTTACTGGCGCAATCCCATCTGATGCTCAAGCCACACAGCTTATAAGCCAAGCGTTCAGTGACGCTTCTAGC  
CGTGCTGGTGGTGTGACTTCTGATGCGAGTCCGGTGCAGAAAGGTAACACTTAACGGAGCCACTACGACTTACCG  
AGAGTTGATTGGTGAGGAACAGTGAACGCTCTCATGGTTCAGCAGACAACGTTTCTCAGTTTGAGACTGACGCGAAGC  
TGAACGAGCAGTATCGCTTGAAGATTAACCTCTGCGCTGAACCAAGAGGACCCCAAGGACAGCTTGGGAGATGCTTCAA  
GGTATCAAGGCTGAACTAGATAAGGTCCAACCTGATGAGCAGATGACACCACAACGTTGAGTGGCTAATCTCCGCACA  
GGAACAAGTTCAGAATCAGATGAACGCATGGACGAAAGCTCAGGCCAAGGCTCTGGACGATTCCATGAAGTCAATGA  
ACAACTTGACGTAATCGACAAGCAATCCAGAAGCGAATCAACGGTGGTGGTCTCAACGGATTTTAAGGATATG  
CCAGTCAACGAGAACACTGGTGGTTCAGCATAGCGATATGGTTAACTACGCCAATAAGAAGCTCGCTGAGATTGA  
CAGTATGGACATTCCAGACGGTGCAGGATGCTATGAAGTTGAAGTACCTTCAAGCGGACTTCAAGGACGGAGCAT  
TCCGTACAGCCATCGAACCATGGTCACTGACGCTGGTCAAGAGTGGTCTGCCGCTGTGATTAACGGTAAAGTTACCA  
GAACGAACCCAGCTATGGATGCTCTGCGCAGAATCCGCAATGCTGACCCTCAGTTGATTGCTGCGCTATACCCAGA  
CCAAGCTGAGCTATTCCTGACGATGGACATGATGGACAAGCAGGGTATTGACCCTCAGGTTATTCTTGATGCCGACC  
GACTGACTGTTAAGCGGTCCAAAGAGCAACGCTTTGAGGATGATAAAGCATTTCGAGTCTGCACTGAATGCATCTAAG  
GCTCCTGAGATTGCCCGTATGCCAGCGTCACTGCGCGAATCTGCACGTAAGATTTATGACTCCGTTAAGTATCGCTC  
GGGGAACGAAAGCATGGCTATGGAGCAGATGACCAAGTTCCTTAAGGAATCTACCTACACGTTCACTGGTGTATGATG  
TTGACGGTGTATACCGTTGGTGTGATTCTAAGAATATGATGCAGGTTAACTCTGACCCGAAATCATGGGAGCAAGGT  
CGGGATATTCTGGAGGAAGCACGTAAGGGAATCATTGCGAGCAACCCTTGGATAACCAATAAGCAACTGACCATGTA  
TTCTCAAGGTGACTCCATTTACCTTATGGACACCACAGGTCAAGTTCAGAGTCCGATACGACAAAGAGTTACTCTCGA  
AGGTCTGGAGTGAGAACCAGAAGAACTCGAAGAGAAAGCTCGTGAGAAGGCTCTGGCTGATGTGAACAAGCGAGCA  
CCTATAGTTGCCGCTACGAAGGCCCGTGAAGCTGCTGCTAAACGAGTCCGAGAGAAACGTAACAGACTCCTAAGTT  
CATCTACGGACGTAAGGAGTAACATAAGGCTACATAAGGAGGCCCTAAATGGATAAGTACGATAAGAACGTACCAAG  
TGATTATGATGGTCTGTTCCAAAAGGCTGCTGATGCCAACGGGGTCTCTTATGACCTTTTACGTAAGTTCGCTTGGGA  
CAGAATCACGATTTGTGCCTACAGCAAAATCTAAGACTGGACCATTAGGCATGATGCAATTTACCAAGGCAACCGCT  
AAGGCCCTCGGTCTGCGAGTTACCGATGGTCCAGACGACGACCGACTGAACCCTGAGTTAGCTATTAATGCTGCCGC  
TAAGCAACTTGCAGGTCTGGTAGGGAAAGTTTGGTGGCGATGAACTCAAAGCTGCCCTTGGCTACAACCAAGGCGAGG  
GACGCTTGGGTAATCCACAACCTGAGGCGTACTCTAAGGGAGACTTCGCATCAATCTCTGAGGAGGGGACGTAACCTAC  
ATGCGTAACCTTCTGGATGTTGCTAAGTCACTATGGCTGGACAGTTGGAACTTTTGGTGGCATAACCCCAAAGGG  
TAAAGGCATTTCCGGCTGAGGTAGGATTGGCTGGAATTTGGTACAAGCAGAAAGTAAACACAGGAACCTTCTGAGTCCA  
CAAGTTTTGACGTTAAGGGTATCGAACAGGAGGCTACGGCGAAACCATTTCGCAAGGACTTTTGGGAGACCCACGGA  
GAAACACTTGACGAGTACAACAGTCGTTCAACCTTCTTCGGATTCAAAAATGCTGCCGAAGCTGAACTCTCCAACCTC  
AGTGCCTGGGATGGCTTTCCGCTGCTGGTTCGATAATGGTTTTGATGTGTTTTAAAGACACCATTACGCCGACTC  
GCTGGAACCTCTCACATCTGGACTCCAGAGGAGTTAGAGAAGATTGAAACAGAGGTTAAGAACCCTGCGTACATCAAC  
GTTGTAACCTGGTGGTTCGCCCTGAGAACCCTCGATGACCTCATTAATTTGGCTAACGAGAACCTTTGAGAATGACTCCCG  
CGCTGCCGAGGCTGGCCTAGGTGCCAAACTGAGTGTGGTATTATTGGTGTGGTGTGGACCCGCTTAGCTATGTTT  
CTATGGTCCGTGCTACTGGTAAGGGCTTTAAGTTAATCAATAAGGCTCTTGTAGTTGGTGGCGAAAGTGTGCTCTG  
AACGTTGCATCCGAAGGTCTCCGTACCTCCGTAGCTGGTGGTGCAGCAGACTATGCGGGTGTGCTTAGGTGGCTT  
TGTGTTTTGGCGCAGGCATGTCTGCAATCAGTGACGCTGTAGCTGCTGGACTGAAACGCAGTAAACCAGAAGCTGAGT  
TCGACAATGAGTTCATCGGTCCTATGATGCGATTGGAAGCCCGTGGACAGCACGAAACGCCAACTCTGCGGACCTC

TCTCGGATGAACACTGAGAACATGAAGTTTGAAGGTGAACATAATGGTGTCCCTTATGAGGACTTACCAACAGAGAG  
AGGTGCCGTGGTGTACATGATGGCTCCGTTCTAAGTGCAAGCAACCCAATCAACCCTAAGACTCTAAAAGAGTTCT  
CCGAGGTTGACCCTGAGAAGGCTGCGCGAGGAATCAAAGTGGCTGGGTTACCGGAGATTGGCTTGAAGACCTTGGGG  
TCTGACGATGCTGACATCCGTAGAGTGGCTATCGACCTCGTTCGCTCTCCTACTGGTATGCAGTCTGGTGCCTCAGG  
TAAGTTCGGTGCAACAGCTTCTGACATCCATGAGAGACTTTCATGGTACTGACCAGCGTACTTATAATGACTTGTACA  
AAGCAATGTCTGACGCTATGAAAGACCCTGAGTTCTCTACTGGCGGCGCTAAGATGTCCCCTGAAGAACTCGATAC  
ACTATCTACCGTAGAGCGGCACTAGCTATTGAGCGTCCAGAACTACAGAAGGCACACTCACTCCGTCTGAGAGAATCGT  
TATGGACATCATTAAAGCGTCACTTTGACACCAAGCGTGAACCTTATGGAAAACCCATCAATATTCGGTAACACAAAG  
CTGTGAGTATCTTCCCTGAGAGTCGCCACAAAGGTAACCTTACGTTCCCTCACGTATATGACCGTCAAGGCGCTG  
ATGATCAACGCTACGGTGCAGAGGTTTGCAGGAAGGATTGCCCGCTCATGGATGAACAGCTACGTCTCCAGACC  
TGAGGTCAAGGCCAGAGTCGATGAGATGCTTAAGGAATTACACGGGGTGAAGGAAGTAAACACCCAGAGTGGTAGAGA  
AGTACGCTATGGATAAGGCTTATGGTATCTCCCACTCAGACCAGTTACCAACAGTTCCATAATAGAAGAGAACATT  
GAGGGCTTAGTAGGTATCGAGAATAACTCATTCCCTTGGAGCACGTAACCTGTTTTGATTTCGGACCTATCCATCACTAT  
GCCAGACGGACAGCAATTTCTCAGTGAATGACCTAAGGGACTTCGATATGTTCCGCATCATGCCAGCGTATGACCGCC  
GTGTCAATGGTGACATCGCCATCATGGGGTCTACTGGTAAAACCACTAAGGAACTTAAGGATGAGATTTTGGCTCTC  
AAAGCGAAAGCTGAGGGAGACGGTAAGAAGACTGGCGAGGTACATGCTTTAATGGATACCGTTAAGATTCTTACTGG  
TCGTGCTAGACGCAATCAGGACACTGTGTGGGAAACCTCACTGCGTGCCATCAATGACCTAGGGTCTTTCGCTAAGA  
ACGCCTACATGGGTGCTCAGAACATTACGGAGATTGCTGGGATGATTGTCACTGGTAACGTTTCGTGCTCTAGGGCAT  
GGTATCCCAATTTCTGCGTGATACACTCTACAAGTCTAAACCAGTTTCAGCTAAGGAACTCAAGGAACTCCATGCGTC  
TCTGTTCCGGAAGGAGGTGGACCAGTTGATTCCGCCCTAAACGTGCTGACATTGTGCAGCGCCTAAGGGAAGCAACTG  
ATACCGGACCTGCCGTGGCGAACATCGTAGGGACCTTGAAGTATTCAACACAGGAACTGGCTGCTCGCTCTCCGTGG  
ACTAAGCTACTGAACGGAACCACTAACTACCTTCTGGATGCTGCGCGTCAAGGTATGCTTGGGGATGTTATTAGTGC  
CACCTAACAGGTAAGACTACCCGCTGGGAGAAAGAAGGCTTCCCTTCGTGGTGCCTCCGTAACCTCTGAGCAGATGG  
CTGGCATCAAGTCTCTCATCAAGGAACATATGGTACGCGGTGAGGACGGGAAGTTTACCGTTAAGGACAAGCAAGCG  
TTCTCTATGGACCCACGGGCTATGGACTTATGGAGACTGGCTGACAAGGTAGCTGATGAGGCAATGCTGCGTCCACA  
TAAGGTGTCCCTTACAGGATTCCCATGCGTTCGGGAGCACTAGGTAAGATGGTTATGCAGTTTAAAGTCTTTCACTATCA  
AGTCCCTTAACTCTAAGTTCCCTGCGAACCTTCTATGATGGATAACAAGAACAACCGAGCGATTGACGCTGCGCTGAGC  
ATCATCACTCTATGGGTCTCGCTGGTGGTTTTCTATGCTATGGCTGCACACGTCAAAGCAACAGCTCTGCCTAAGGA  
GAAACGTAAGGAGTACTTGGAGCGTGCACCTGGACCCAAACCTGATTGCCACGCTGCGTTATCTCGTAGTTCTCAAT  
TGGGTGCTCCCTTGGCTATGGTTGACCTAGTTGGTGGTTTTAGGGTTCGAGTCCCAAGATGGCTCGCTCACTACG  
ATTCTACCTAAGGACACCGTGAAGGAACGTGACCCAAACAAACCGTACACCTCTAGAGAGGTAATGGGCGCTATGGG  
TTCAAACCTTCTGGAACAGATGCCTTCGGCTGGCTTTGTGGCTAACGTAGGGGCTACCTTAATGAATGCTGCTGGCG  
TGGTCAACTCACCTAATAAAGCAACCGAGCAGGACTTCATGACTGGTCTTATGAACTCCACAAAAGAGTTAGTACCG  
AACGACCCATTGACTCAACAGCTTGTGTTGAAGATTTATGAGGCGAACGGTGTAACTTGAAGGAGCGTAGGAAATA  
ATACGACTCACTATAGGGAGAGGCGAAATAATCTTCCCTGTAGTCTCTTAGATTTACTTTAAGGAGGTCAAATGG  
CTAACGTAATTTAAACCGTTTTGACTTACCAGTTAGATGGCTCCAATCGTGATTTTAAATATCCCGTTTTGAGTATCTA  
GCCCCGTAAGTTTCGTAGTGGTAACCTCTTATTGGTGTAGACCGAAAGGTCCTTACGATTAATACAGACTATCGCTTTGC  
TACACGTAATACTATCTCTGACAAAGGCTTGGGGTCCAGCCGATGGCTACACGACCATCGAGTTACGTGAGTAA  
CCTCCACTACCGACCGATTGGTTGACTTTACGGATGGTTCAATCCTCCGCGCGTATGACCTTAAAGTTCGCTCAGATT  
CAAACGATGCACGTAGCGGAAGAGGCCCGTACCTCACTACGGATACTATCGGTGTCAATAACGATGGTCACTTGGG  
TGCTCGTGGTTCGATGCAATTTGTGAACCTAGCGAACGCCGTGGATGACCGCGATGCTGTTCCGTTTTGGTCAACTAAAGA  
CCATGAACCAGAACTCATGGCAAGCACGTAATGAAGCCTTACAGTTCGGTAATGAGGCTGAGACTTTCAGAAACCAA  
GCGGAGGGCTTTAAGAACGAGTCCAGTACCAACGCTACGAACCAAAGCAGTGGCGCGATGAGACCAAGGGTTTTCCG  
AGACGAAGCCAAGCGGTTCAAGAATACGGCTGGTCAATACGCTACATCTGCTGGGAACTCTGCTTCCGCTGCGCATC  
AATCTGAGGTAACGCTGAGAACTCTGCCACAGCATCCGCTAACTCTGCTCATTGCGCAGAACAGCAAGCAGACCGT  
GCGGAACGTGAGGCGAGACAAGCTGGAAAATTACAATGGATTGGCTGGTGAATGATAAGGTAGATGGAACCAATGT  
GTACTGGAAGGAAATATTACGCTAACGGGCGCCTTTACATGACCACAAACGGTTTTGACTGTGGCCAGTATCAAC  
AGTTCTTTGGTGGTGTCACTAATCGTTACTCTGTGATGGAGTGGGGAGATGAGAACGGATGGCTGATGTATGTTCAA  
CGTAGAGAGTGGACAACAGCGATAGGCGGTAACATCCAGTTAGTAGTAAACGGACAGATCATCACCAAGGTGGAGC  
CATGACCGGTGAGCTAAAATTGCGAATGGGCATGTTCTTCAATTAGAGTCCGCATCCGACAAGGCGCACTATATTC  
TATCTAAAGATGGTAACAGGAATAACTGGTACATTGGTAGAGGGTACAGATAACAACAATGACTGTACCTTCCACTCC  
TATGTACATGGTACGACCTTAAACTCAAGCAGGACTATGCAGTAGTTAAACAAACACTTCCACGTAGGTACAGCCGT  
TGTGGCCACTGATGGTAATATTCAAGGTAACCTAAGTGGGGAGGTAAATGGCTGGATGCTTACCTACGTGACAGCTTCG  
TTGCGAAGTCCAAGGCGTGGACTCAGGTGTGGTCTGGTAGTGCTGGCGGTGGGGTAAAGTGTGACTGTTTTACAGGAT  
CTCCGCTTCCGCAATATCTGGATTAAGTGTGCCAACAACCTTTGGAACCTTCTCCGTAAGTGGCCCCGATGGAATCTA  
CTTCATAGCCTCTGATGGTGGATGGTTACGATTCCAATACACTCCAACGGTCTCGGATTCAGAATATTGCAGACA  
GTCGTTCACTACCTAATGCAATCATGGTGGAGAACGAGTAATTGGTAAATCACAAGGAAAGACGTGTAGTCCACGGA

TGGACTCTCAAGGAGGTACAAGGTGCTATCATTAGACTTTAACAACGAATTGATTAAGGCTGCTCCAATTGTTGGGA  
CGGGTGTAGCAGATGTTAGTGTCTGACTGTTCTTTGGGTTAAGCCTTAACGAATGGTTCTACGTTGCTGCTATCGCC  
TACACAGTGGTTAGATTGGTGCCAAGGTAGTCGATAAGATGATTGACTGGAAGAAAGCCAATAAGGAGTGATATGT  
ATGAAAAGGATAAGAGCCTTATTACATTCTTAGAGATGTTGGACACTGCGATGGCTCAGCGTATGCTTGGCGACCT  
TTCGGACCATGAGCGTCGCTCTCCGCAACTCTATAATGCTATTAACAACTGTTAGACCGCCACAAGTTCCAGATTG  
GTAAGTTGCAGCCGGATGTTACATCTTAGGTGGCCTTGGCTGGTGTCTTGAAGAGTACAAAGAGAAAGTCCGGTGT  
AACGGTCTTACGGATGATGATATTTACACATTACAGTGATATACTCAAGGCCACTACAGATAGTGGTCTTTATGGAT  
GTCATTGTCTATACGAGATGCTCCTACGTGAAATCTGAAAGTTAACGGGAGGCATTATGCTAGAATTTTTACGTAAG  
CTAATCCCTTGGGTTCTCGCTGGGATGCTATTCCGGTTAGGATGGCATCTAGGGTCAGACTCAATGGACGCTAAATG  
GAAACAGGAGGTACACAATGAGTACGTTAAGAGAGTTGAGGCTGCGAAGAGCACTCAAAGAGCAATCGATGCGGTAT  
CTGCTAAGTATCAAGAAGACCTTGCCGCGCTGGAAGGGAGCACTGATAGGATTATTTCTGATTTGCGTAGCGACAAT  
AAGCGGTTGCGCTCAGAGTCAAACTACCGGAACCTCCGATGGTCAGTGTGGATTTCGAGCCTGATGGTCGAGCCGA  
ACTTGACGACCGAGATGCTAAACGTATTCTCGCAGTGACCCAGAAGGGTGACGCATGGATTTCGTGCGTTACAGGATA  
CTATTTCGTGAAGTGAACGTAAGTAGGAAATCAAGTAAGGAGGCAATGTGTCTACTCAATCCAATCGTAATGCGCTC  
GTAGTGGCGCAACTGAAAGGAGACTTCGTGGCGTTTCTATTTCGTCTTATGGAAGGCGCTAAACCTACCGGTGCCAC  
TAAGTGTGAGATTGACATGGCTAAGGTGCTGGCGAATGGAGACAACAAGAAGTTCATCTTACAGGCTTTCCGTGGTA  
TCGGTAAGTCGTTTCATCACATGTGCGTTCGTTGTGTGGTCCTTATGGAGAGACCCTCAGTTGAAGATACTTATCGTA  
TCAGCCTCTAAGGAGCGTGCAGACGCTAACTCCATCTTTATTAAGAACATCATTGACCTGCTGCCATTCTATCTGA  
GTTAAAGCCAAGACCCGGACAGCGTGACTCGGTAATCAGCTTTGATGTAGGCCAGCCAATCCTGACCACTCTCCTA  
GTGTGAAATCAGTAGGTATCACTGGTCAGTTAACTGGTAGCCGTGCTGACATTATCATTGCGGATGACGTTGAGATT  
CCGTCTAACAGCGCAACTATGGGTGCCCGTGAGAAGCTATGGACTCTGGTTTCAGGAGTTTCGTGCGTTACTTAAACC  
GCTGCCTTCTCTCGCGTTATCTACCTTGGTACACCTCAGACAGAGATGACTCTCTATAAGGAACCTTGAGGATAACC  
GTGGGTACACAACCATTATCTGGCCTGCTCTGTACCCAAGGACACGTGAAGAGAACCTCTATTACTCACAGCGTCTT  
GCTCCTATGTTACGCGCTGAGTACGATGAGAACCCTGAGGCACCTTGCTGGGACTCCAACAGACCCAGTGCCTTTGA  
CCGTGATGACCTGCGCGAGCGTGAGTTGGAATACGGTAAGGCTGGCTTTACGCTACAGTTCATGCTTAAACCCTAAC  
TTAGTGATGCCGAGAAGTACCCGCTGAGGCTTCGTGACGCTATCGTAGCGGCCTTAGACTTAGAGAAGGCCCAATG  
CATTACCAGTGGCTTCCGAACCGTCAGAACATCATTGAGGACCTTCCTAACGTTGGCCTTAAGGGTGATGACCTGCA  
TACGTACCACGATTGTTCCAACAACCTCAGTTCAGTACCAACAAGAAGATTCTGGTCATTGACCCCTAGTGGTCCGCGTA  
AGGGAACAACAGGTTACGCTGTGCTGTACACACTGAACGGTTACATCTACCTTATGGAAGCTGGAGGTTCCCGTGAT  
GGCTACTCCGATAAAGCCTTGGATTACTCGCTAAGAAGGCAAAGCAATGGGGAGTCCAGACGGTTGTCTACGAGAG  
TAACTTCGGTGACGGTATGTTTCGGTAAGGTATTAGTCCATCTCTTCTTAAACACCACAACCTGTGCGATGGAAGAGA  
TTCGTGCCCCGTGGTATGAAAGAGATGCGTATTTGCGATAACCCTTGAGCCAGTCATGCAGACTCACCGCCTTGTAATT  
CGTGATGAGGTCATTAGGGCCGACTACCAGTCCGCTCGTGACGTAGACGGTAAGCATGACGTTAAGTACTCGTTGTT  
CTACCAGATGACCCGTATCACTCGTGAGAAAGGCGCTCTGGCTCATGATGACCGATTGGATGCCCTTGCCTTAGGCA  
TTGAGTATCTCCGTGAGTCCATGCAGTTGGATTCCGTTAAGGTCGAGGGTGAAGTACTTGCTGACTTCCTTGAGGAA  
CACATGATGCGTCTACGGTTGCTGCTACGCATATCATTGAGATGTCTGTGGGAGGAGTTGATGTGACTCTGAGGA  
CGATGAGGGTTACGGTACGTCTTTTCATTGAGTGGTGATTTATGCATTAGGACTGCATAGGGATGCACTATAGACCAC  
GGATGGTCAGTTCTTTAAGTTACTGAAAAGACACGATAAATTAATACGACTCACTATAGGGAGAGGAGGGACGAAAG  
GTTACTATATAGATACTGAATGAATACTTATAGAGTGCATAAAGTATGCATAATGGTGTACCTAGAGTGACCTCTAA  
GAATGGTGATTATATTGTATTAGTATCACCTTAACTTAAAGGACCAACATAAAGGGAGGAGACTCATGTTCCGCTTAT  
TGTTGAACCTACTGCGGCATAGAGTCACCTACCGATTTCTTGTGGTACTTTGTGCTGCCCTTGGGTACGCATCTCTT  
ACTGGAGACCTCAGTTCAGTGGAGTCTGTGCTTTGCTCTATACTCACTTGTAGCGATTAGGGTCTTCTTGACCGACT  
GATGGCTCACCGAGGGATTACGCGGTATGATTGCATCACACCACTTCATCCCTATAGAGTCAAGTCCCTAAGGTATAC  
CCATAAAGAGCCTCTAATGGTCTATCCTAAGGTCTATACCTAAAGATAGGCCATCCTATCAGTGTACCTAAAGAGG  
GTCTTAGAGAGGGCCTATGGAGTTCCTATAGGGTCCCTTAAAAATATACCATAAAAAATCTGAGTGACTATCTCACAGT  
GTACGGACCTAAAGTTCACCCATAGGGGGTACCTAAAGCCCAGCCAATCACCTAAAGTCAACCTTCGGTTGACCTTG  
AGGGTCCCTAAGGGTTGGGGATGACCCCTTGGGTTTGTCTTTGGGTGTTACTTCCCCATAGGGGGTACCTAAAGCC  
CAGCCAATCACCTAAAGTCAACCTTCGGTTGACCTTGGGGTTCCCTAAGGGTTGGGGATGACCCCTTGGGTTTGTCT  
TTGGGTGTTACCTTGGAGTGTCTCTCTGTGTCCCTATCTGTTACAGTCTCCTAAAGTATCCTCCTAAAGTACCTCCT  
AACGTCCATCCTAAAGCCAACACCTAAAGCCTACACCTAAAGACCCATCAAGTCAACGCCTATCTTAAAGTTTAAAC  
ATAAAGACCAGACCTAAAGACCAGACCTAAAGACACTACATAAAGACCAGACCTAAAGACGCCTTGTGTTAGCCAT  
AAAGTGATAACCTTTAATCATTGTCTTTATTAATACAACCTCACTATAAGGAGAGACAACCTTAAAGAGACTTAAAGA  
TTAATTTAAAATTTATCAAAAAGAGTATTGACTTAAAGTCTAACCTATAGGATACTTACAGCCATCGAGAGGGACAC  
GGCGAATAGCCATCCCAATCGACACCGGGGTCAACCGGATAAGTAGACAGCCTGATAAGTCGCACGAAAAACAGGTA  
TTGACAACATGAAGTAACATGCAGTAAGATACAAATCGCTAGGTAACACTAGCAGCGTCAACCGGGCGCACAGTGCC  
TTCTAGGTGACTTAAAGCGCACACGGCACATAAGGTGAAACAAAACGGTTGACAACATGAAGTAAACACGGTACGAT  
GTACCACATGAAACGACAGTGAGTACCACACTGAAAGGTGATGCGGTCTAACGAAACCTGACCTAAGACGCTCTTT

AACAATCTGGTAAATAGCTCTTGAGTGCATGACTAGCGGATAACTCAAGGGTATCGCAAGGTGCCCTTTATGATATT  
CACTAATAACTGCACGAGGTAACACAAGATGGCTATGTCTAACATGACTTACAACAACGTTTTTCGACCACGCTTACG  
AAATGCTGAAAGAAAACATCCGTTATGATGACATCCGTGACACTGATGACCTGCACGATGCTATTACATGGCTGCC  
GATAATGCAGTTCGCGACTACTACGCTGACATCTTTAGCGTAATGGCAAGTGAGGGCATTGACCTTGAGTTTGAAGA  
CTCTGGTCTGATGCCTGACACCAAGGACGTAATCCGCATCCTGCAAGCGCGTATCTATGAGCAATTAACGATTGACC  
TCTGGGAAGACGCAGAAGACTTGCTCAATGAATACTTGGAGGAAGTCGAGGAGTACGAGGAGGATGAAGAGTAATGT  
CTACTACCAACGTGCAATACGGTCTGACCGCTCAAACGTACTTTTCTATAGCGACATGGTGGCTGTGGCTTTAAC  
TGGTCACTCGCAATGGCACAGCTCAAAGAAGTGTACGAAAACAACAAGGCAATAGCTTTAGAATCTGCTGAGTGATA  
GACTCAAGGTCGCTCCTAGCGAGTGGCCTTTATGATTATCACTTTACTTATGAGGGAGTAATGTATATGCTTACTAT  
CGGTCTACTCACCCTCTAGGTCTAGCTGTAGGTGCATCTTTGGGAAGGCTTTAGGTGTAGCTGTAGTTCTCTACT  
TTACCGCTTGCATCATATAGGAATCATCAAAGGGGCACTACGCAAAATGATGAAGCACTAGCTTATGCCAATCCACA  
CGTCCAACGGGGCAACCGTATGTACACCTGATGGGTTTCGCAATGAAACAACGAATCGAACGCCTTAAGCGTGAACCTC  
CGCATTAAACCGCAAGATTAACAAGATAGGTTCCGGCTATGACAGAACGCACTGATGGCTTAAAGAAAAGGTTATATGC  
CCAATGGCACACTATACGCTGCAAATCGGCGAATAGTGAGAAGTGGGCGAGAGAACAACCTCGAACGCCGCAAGGAA  
CAAGAGAGGGCGGCGTGGCATAGACGAAAGGAAAAGGTTAAAGCCAAGAAAAGTTCGCCGCACTTGAACAGGCACTAGC  
CAACACACTGAACGCTATCTCATAACGAACATAAAGGACACAATGCAATGAACATTACCGACATCATGAACGCTATC  
GACGCAATCAAAGCACTGCCAATCTGTGAAGTGGACAAGCGTCAAGGTATGCTTATCGACTTACTGGTTCGAGATGGT  
CAACAGCGAGACGTGTGATGGCGAGCTAACCAGAACTAAATCAGGCCTTGGAGCATCAAGATTGGTGGACTACCTTGA  
AGTGTCTCACGGCTGACGCAGGGTTCAAGATGCTCGGTAATGGTCACTTCTCGGCTGCTTATAGTCACCCGCTGCTA  
CCTAACAGAGTGATTAAGGTGGGCTTTAAGAAAGAGGATTTCAGGCGCAGCCTATACCGCATTCTGCCGATGTATCA  
GGGTCGTCCTGGTATCCCTAACGTCTACGATGTACAGCGCCACGCTGGATGCTATACGGTGGTACTTGACGCACTTA  
AGGATTGCGAGCGTTTTCAACAATGATGCCATTATAAATACGCTGAGATTGCAAGCGACATCATTGATTGCAATTCCG  
GATGAGCATGATGAGTTAACTGGATGGGATGGTGGTGGTGGTGGTGGTGGTGGTGGTGGTGGTGGTGGTGGTGGTGGT  
CATCGCCTCATTTCGACATGCATAGCGGGAACATCATGTTCTCAAATGGAGACGTACCATAACATCACCGACCCGGTAT  
CATTCTCGCAGAAGAAAAGACGGTGGCGCATTACGATCGACCCCTGAGGAACTCATCAAGGAAGTCGAGGAAGTCGCA  
CGACAGAAAAGAAATTGACCGCGCTAAGGCCCGTAAAGAACGTACGAGGGGGCGCTTAGAGGCACGCAGATTCAAACG  
TCGCAACCGCAAGGCACGTAAAGCACACAAAGCTAAGCGCGAAAGAATGCTTGTGCGTGGCGATGGGCTGAACGTC  
AAGAAGCGCGTAACCATGAGGTAGCTGTAGATGTACTAGGAAGAACAACCAATAACGCTATGCTCTGGGTCAACATGTTT  
TCTGGGGACTTTAAGGCGCTTGAGGAACGAATCGCGCTGCATGGCGTAATGCTGACCGGATGGCTATCGCTAATGG  
TCTTACGCTCAACATTGATAAGCAACTTGACGCAATGTTAATGGGCTGATAGTCTTATCTTACAGGTATCTGCGGG  
TGGCCTGAATAGGTACGATTTACTAACTGGAAGAGGCACTAAATGAACACGATTAACATCGCTAAGAACGACTTCTC  
TGACATCGAACTGGCTGCTATCCCCTTCAACACTCTGGCTGACCATTACGGTGAGCGTTTTAGCTCGCGAACAGTTGG  
CCCTTGAGCATGAGTCTTACGAGATGGGTGAAGCACGCTTCCGCAAGATGTTTGAGCGTCAACTTAAAGCTGGTGGAG  
GTTGGCGATAACGCTGCCGCCAAGCCTCTCATCACTACCCTACTCCCTAAGATGATTGCACGCATCAACGACTGGTT  
TGAGGAAGTGAAGCTAAGCGCGGCAAGCGCCGACAGCCTTCCAGTTCCTGCAAGAAATCAAGCCGGAAGCCGTAG  
CGTACATCACCATTAAGACCCTCTGGCTTGCCTAACAGTGTGACAATAACAACCGTTTACGGCTGTAGCAAGCGCA  
ATCGGTCGGGCCATTGAGGACGAGGCTCGCTTCCGTCGTATCCGTGACCTTGAAGCTAAGCACTTCAAGAAAAACGT  
TGAGGAACAACCTCAACAAGCGCGTAGGGCACGTCTACAAGAAAGCATTATGCAAGTTGTGAGGCTGACATGCTCT  
CTAAGGGTCTACTCGGTGGCGAGGCGTGGTCTTCCGTGGCATAAGGAAGACTCTATTATGTAGGAGTACGCTGCATC  
GAGATGCTCATTGAGTCAACCGGAATGGTTAGCTTACACCGCCAAAATGCTGGCGTAGTAGGTCAAGACTCTGAGAC  
TATCGAACTCGCACCTGAATACGCTGAGGCTATCGCAACCCGTGCAGGTGCGCTGGCTGGCATCTCTCCGATGTTCC  
AACCTTGCCTAGTTCCTCCTAAGCCGTGGACTGGCATTACTGGTGGTGGCTATTGGGCTAACGGTGCCTCGTCTCTG  
GCGCTGGTGCCTACTCACAGTAAGAAAGCACTGATGCGCTACGAAGACGTTTACATGCCTGAGGTGTACAAAGCGAT  
TAACATTGCGCAAAACACCGCATGGAAAATCAACAAGAAAGTCTTAGCGGTGCGCAACGTAATCACCAAGTGAAGC  
ATTGTCCGGTCGAGGACATCCCTGCGATTGAGCGTGAAGAACTCCCGATGAAACCGGAAGACATCGACATGAATCCT  
GAGGCTCTCACCGCGTGGAAACGTGCTGCCGCTGCTGTGTACCACAAGGACAAGGCTCGCAAGTCTCGCCGATCAG  
CCTTGAGTTTATGCTTGAGCAAGCCAATAAAGTTTGTCAACCATAAAGGCCATCTGGTTCCCTTACAACATGGACTGGC  
CGGTCGTTGTTTACGCTGTGTCAATGTTCAACCCGCAAGGTAACGATATGACCAAAGGACTGCTTACGCTGGCGAAA  
GGTAAACCAATCGGTAAGGAAGGTTACTACTGGCTGAAAATCCACGGTGCAAACGTGCGGGTGTGATAAGGTTCC  
GTTCCCTGAGCGCATCAAGTTTATTGAGGAAAACACGAGAACATCATGGCTTGGCGTAAGTCTCCACTGGAGAACA  
CTTGGTGGGCTGAGCAAGATTCTCCGTTCTGCTTCCCTTGGCTTCTGCTTTGAGTACGCTGGGGTACAGCACCGGC  
CTGAGCTATAACTGCTCCCTTCCGCTGGCGTTTGGAGGGTCTTGGCTTGGCATCCAGCACTTCTCCGCGATGCTCCG  
AGATGAGGTAGGTGGTTCGCGCGGTTAACTTGTCTTCTAGTGAAACCGTTTACAGGACATCTACGGGATTGTTGCTAAGA  
AAGTCAACGAGATTCTACAAGCAGACGCAATCAATGGGACCGATAACGAAGTAGTTACCGTGACCGATGAGAACACT  
GGTGAATCTCTGAGAAAGTCAAGCTGGGCACTAAGGCACTGGCTGGTCAATGGCTGGCTTACGGTGTACTCGCAG  
TGTGACTAAGCGTTTCAAGTCAAGCTGGGCACTAAGGCACTGGCTGGTCAATGGCTGGCTTACGGTGTACTCGCAG  
TGTGACTAAGCGTTTCAAGTCAAGCTGGGCACTAAGGCACTGGCTGGTCAATGGCTGGCTTACGGTGTACTCGCAG  
CCATTACGCCAGCTATTGATTCCGGCAAGGGTCTGATGTTCACTCAGCCGAATCAGGCTGCTGGATAACATGGCTAAG

CTGATTTGGGAATCTGTGAGCGTGACGGTGGTAGCTGCGGTTGAAGCAATGAACTGGCTTAAGTCTGCTGCTAAGCT  
GCTGGCTGCTGAGGTCAAAGATAAGAAGACTGGAGAGATTCTTCGCAAGCGTTGCGCTGTGCATTGGGTAACCTCTG  
ATGGTTTCCCTGTGTGGCAGGAATACAAGAAGCCTATTTCAGACGCGCTTGAACCTGATGTTCCCTCGGTGAGTTCCGC  
TTACAGCCTACCATTAACACCAACAAAGATAGCGAGATTGATGCACACAAACAGGAGTCTGGTATCGCTCCTAACTT  
TGTACACAGCCAAGACGGTAGCCACCTTCGTAAGACTGTAGTGTGGGCACACGAGAAGTACGGAATCGAATCTTTTG  
CACTGATTCACGACTCCTTCGGTACCATTCCGGCTGACGCTGCGAACCTGTTCAAAGCAGTGCAGGAACTATGGTT  
GACACATATGAGTCTTGTGATGTACTGGCTGATTTCTACGACCAGTTTCGCTGACCAGTTGCACGAGTCTCAATTGGA  
CAAAATGCCAGCACTTCCGGCTAAAGGTAACCTGAACTCCGTGACATCTTAGAGTCGGACTTCCGCTTCCGCTAAC  
GCCAAATCAATACGACTCACTATAGAGGGACAACTCAAGGTCATTTCGCAAGAGTGGCCTTTATGATTGACCTTCTT  
CCGGTTAATACGACTCACTATAGGAGAACCCTTAAGGTTTAACTTTAAGACCCTTAAGTGTTAATTAGAGATTTAAAT  
TAAAGAATTACTAAGAGAGGACTTTAAGT

>NRG-P0100

ATGCGTAACTTCGAAAAGATGACCAAACGTTCTAACCCTAATGCTCGTGACTTCGAGGCAACCAAAGGTCGCAAGTT  
GAATAAGACTAAGCGTGACCGCTCTCACAAGCGTAGCTGGGAGGGTCAGTAAGATGGGACGTTTATATAGTGGTAAT  
CTGGCAGCATTCAAGGCAGCAACAAACAAGCTGTTCCAGTTAGACTTAGCGGTCATTTATGATGACTGGTATGATGC  
CTATAACAAGAAAAGATTGCATACGGTTACGTATTGAGGACAGGAGTGGAAACCTGATTGATACTAGCACCTTCTACC  
ACCACGACGAGGACGTTCTGTTCAATATGTGTACTGATTGGTTGAACCATATGTATGACCAGTTGAAGGACTGGAAG  
TAATACGACTCAGTATAGGGACAATGCTTAAGGTCGCTCTCTAGGAGTGGCCTTAGTCATTTAACCAATAGGAGATA  
AACATTATGATGAACATTAAGACTAACCCTGTTTAAAGCCGTGTCTTTTCGTAGAGTCTGCCATTAAGAAGGCTCTGGA  
TAACGCTGGGTATCTTATCGCTGAAATCAAGTACGATGGTGTACGCGGGAACATCTGCGTAGACAATACTGCTAACA  
GTTACTGGCTCTCTCGTGTATCTAAAACGATTCCGGCAGTGGAGCACTTAAACGGGTTTGATGTTCCGCTGGAAGCGT  
CTACTGAACGATGACCGTTGCTTCTACAAAGATGGCTTTATGCTTGATGGGGAACCTCATGGTCAAGGGCGTAGACTT  
TAACACAGGGTCCGGCCTACTGCGTACCAAATGGACTGACACGAAGAACCAAGAGTTCCATGAAGAGTTATTCGTTG  
AACCAATCCGTAAGAAAAGATAAAGTTCCCTTTAAGCTGCACACTGGACACCTTCACATAAAACTGTACGCTATCCTC  
CCGCTGCACATCGTGGAGTCTGGAGAAGACTGTGATGTATGACGTTGCTCATGCAGGAACACGTTAAGAACATGCT  
GCCTCTGCTACAGGAATACTTCCCTGAAATCGAATGGCAAGCGGCTGAATCTTACGAGGCTACGATATGGTAGAAC  
TACAGCAACTGTACGAGCAGAAGCGAGCAGAAGGCCATGAGGGTCTCATTGTGAAAGACCCGATGTGTATCTATAAG  
CGCGGTAAGAAATCTGGCTGGTGGAAAATGAAACCTGAGAACGAAGCTGACGGTATCATTACAGGCTCTGGTATGGGG  
TACAAAAGGCTCTGGCTAATGAAGGTAAAGTGATTGGTTTTGAGGTGCTTCTTGAGAGTGGTCGTTTAGTTAACGCCA  
CGAATATCTCTCGCGCCTTAATGGATGAGTTCACTGAGACAGTAAAAGAGGCCACCCTAAGTCAATGGGGATTCTTT  
AGCCCATACGGTATTGGCGACAACGATGCTTGTACTATTAACCCTTACGATGGCTGGGCGTGTCAAATTAGCTACAT  
GGAGGAAACACCTGATGGCTCTTTGCGGCACCCATCGTTTCTAATGTTCCGTTGGCACCGAGGACAACCCTCAAGAGA  
AAATGTAATCACACTGGCTCACCTTCGGGTGGGCCTTTCTGCGTTTATAAGGAGACACTTTATGTTTAAAGAAGGTTG  
GTAAATTCCTTGGCGCTTTGGCAGCTATCCTGACGCTTGCCTATATTCTTGGCGTATACCCTCAAGTAGCACTAGTA  
GTAGTTGGCGCTTGTACTTAGCGGCAGTGTGTGCTTGCCTGTGGAGTATAGTTAACTGGTAATACGACTCACTAAA  
GGAGGTACACACCATGATGTACTTAATGCCATTACTCATCGTCATTGTAGGATGCCTTGCCTCCACTGTAGCGATG  
ATGATATGCCAGATGGTCACGCTTAATACGACTCACTAAAGGAGACACTATATGTTTCGACTTCATTACAACAAAAG  
CGTTAAGAATTTACGCTTCCCGTGCTGACCGTTCAATCGTATGTGCGAGCGAGCGCCGAGCTAAGATACCTCTTA  
TTGGTAACACAGTTCTTTGGCACCAGCGTCCACATCATTATACCCGTTGGTGACTTTGAGAAAGCAATAGACAAG  
AAACGTCGGGTTCTTAGTGTGGCAGTGACCCGCTTCCCGTTTCGTCGGTCTGTTACTCAAACGAATCAAGGAGGTGTT  
CTGATGGGACTGTTAGATGGTGAAGCCTGGGAAAAAGAAAACCCGCCAGTACAAGCAACTGGGTGTATAGCTTGCTT  
AGAGAAAGATGACCGTTATCCACACACCTGTAACAAAGGAGCTAACGATATGACCGAACGTGAACAAGAGATGATCA  
TTAAGTTGATAGACAATAATGAAGGTCGCCCAGATGATTTGAATGGCTGCGGTATTCTCTGCTCCAATGTCCCTTGC  
CACCTCTGCCCCGCAAATAACGATCAAAAGATAACCTTAGGTGAAATCCGAGCGATGGACCCACGTAACCACATCT  
GAATAAACCTGAGGTAACCTTACAGATGACCAAGCCTTCCGCTGAGACAATCGAAGGTGTCACTAAGCCTTCCCCT  
ACATGCTGTTTACGACACTTGGGCTATCGAAGTGATTGCTCGTTCAATGACCGTTGAGCAGTTCAAGGGATACTGC  
TTCGGTAACATCTTAAAGTACAGACTACGTGCTGGTAAGAAGTCAAGTATAGCGTACTTAGAGAAAAGACCTAGCGAA  
AGCAGACTTCTATAAAGAAGTCTTTGAGAAACATAAGGATAAATGTTATGCATAACTTCAAGTCAACCCACCTGCC  
GACAGCCTATCTGATGACTTACATCTTGTCTAGAGTGGTGCCGAAAGATGTGGGAAGAGACATTTCGACGATGCGTA  
CATCAAGCTGTATGAACTTTGGAAATCGAGAGGTCAATGACTATGTCAAACGTAATAACAGGTTCACTTAGTGTGGA  
CAATAAGAAGTTTTGGGCTACCGTAGAGTCCCTCGGAGCATTCCCTTCGAGGTTCCAATCTACGCTGAGACCCTAGACG  
AAGCTCTGGAGTTAGCCGAATGGCAATACGTTCCGGCTGGCTTTGAGGTTACTCGTGTGCGTCTTGTGTAGCACCG  
AAGTAATACGACTCACTATTAGGGAAGACTCCCTCTGAGAAACCAAACGAAACCTAAAGGAGATTAACATTATGGCT  
AAGAAGATTTTACCTCTGCGCTGGGTACCCTGAACTTACGCTTACATCGCAAGCCGGACTACGGCAACGAAGA  
GCGTGGCTTTGGGAACCCTCGTGGTGTCTATAAAGTTGACCTGACTATTCCCAACAAAGACCCGCGCTGCCAGCGTA  
TGGTCGATGAAATCGTGAAGTGTACGAAGAGGCTTATGCTGCTGCCGTTGAGGAATACGAAGCTAATCCACCTGCT

GTAGCTCGTGGTAAGAAACCGCTGAAACCGTATGAGGGTGACATGCCGTTCTTCGATAACGGTGACGGTACGACTAC  
CTTTAAGTTCAAATGCTACGCGTCTTTCCAAGACAAGAAGACCAAAGAGACCAAGCACATCAATCTGGTTGTGGTTG  
ACTCAAAGGTAAGAAGATGGAAGACGTTCCGATTATCGGTGGTGGCTCTAAGCTGAAAGTTAAATATTCTCTGGTT  
CCATACAAGTGGAACACTGCTGTAGGTGCGAGCGTTAAGCTGCAACTGGAATCCGTGATGCTGGTCGAACTGGCTAC  
CTTTGGTGGCGGTGAAGACGATTGGGCTGACGAAGTTGAAGAGAACGGCTATGTTGCCTCTGGTTCTGCCAAAGCGA  
GCAAACCACGCGACGAAGAAAGCTGGGACGAAGACGACGAAGAGTCCGAGGAAGCAGACGAAGACGGGACTTCTAA  
GTGGAACGCGGGGAGAAAATCCTTGAGCGAATCAAGGTGACTTCCTCTGGGTGTTGGGAGTGGCAGGGCGCTACGAA  
CAATAAAGGGTACGGGCAGGTGTGGTGCAGCAATACCGGAAAGGTTGTCTACTGTCATCGCGTAATGTCTAATGCTC  
CGAAAGGTTCTACCGTCTGCACTCCTGTGATAATCCATTATGTTGTAACCCTGAACACCTATCCATAGGAACTCCA  
AAAGAGAACTCCACTGACATGGTAAATAAGGGTCGCTCACACAAGGGGTATAAACTTTCAGACGAAGACGTAATGGC  
AATCATGGAGTCCAGCGAGTCCAATGTATCCTTAGCTCGACCTATGGTGTCTCCCAACAGACTATTTGTGATATAC  
GCAAAGGGAGGCGACATGGCAGGTTACGGCGCTAAAGGAATCCGAAAGGTTGGAGCGTTTCGCTCTGGCCTAGAGGA  
CAAGGTTTTCAAAGCAGTTGGAATCAAAGGTTAAATTCGAGTATGAAGAGTGGAAAGTGCCTTATGTAATTCGGG  
CGAGCAATCACACTTACACTCCAGACTTCTTACTTCCAAACGGTATATTCGTTGAGACAAAGGGTCTGTGGGAAAGC  
GATGATAGAAAGAAGCACTTATTAATTAGGGAGCAGCACCCCGAGCTAGACATCCGTATTGTCTTCTCAAGCTCACG  
TACTAAGTTATACAAAGGTTCTCCAACGTCTTATGGAGAGTCTGCGAAAAGCATGGTATTAAGTTCGCTGATAAAC  
TGATACCTGCTGAGTGGATAAAGGAACCCAAAGAAGGAGGTCCCCTTTGATAGATTAAAAAGGAAAGGAGGAAAGAAA  
TAATGGCTCGTGTACAGTTTTAAACAACGTGAATCTACTGACGCAATCTTTGTTCACTGCTCGGCTACCAAGCCAAGT  
CAGAATGTTGGTGTCCGTGAGATTGCCAGTGGCACAAGAGCAGGGTTGGCTCGATGTGGGATAACCACTTTATCAT  
CAAGCGAGACGGTACTGTGGAGGCAGGACGAGATGAGATGGCTGTAGGCTCTCACGCTAAGGGTTACAACCACA  
CTATCGGCGTCTGCCTTGTGGTGGTATCGACGATAAAGGTAAGTTCGACGCTAACTTTACGCCAGCCCAAATGCAA  
TCCCTTCGCTCACTGCTTGTACACTGCTGGCTAAGTACGAAGGCGCTGTGCTTCGCGCCCATCATGAGGTGGCGCC  
GAAGGCTTGCCCTTCGTTTCGACCTTAAGCGTTGGTGGGAGAAGAACGAACGAACTGGTCACTTCTGACCGTGGATAATTA  
TTGAACTCACTAAAGGGAGACCACAGCGGTTTTCCCTTTGTTTCGCATTGGAGGTCAAATAATGCGCAAGTCTTATAAA  
CAATTCTATAAGGCTCCGAGGAGGCATATCCAAGTGTGGGAGGCAGCCAATGGGCCTATACCAAAGGTTATTATAT  
AGACCACATTGACGGCAATCCACTCAACGACGCCTTAGACAATCTCCGTCTGGCTCTCCCAAAAGAAAACCTCATGGA  
ACATGAAGACTCCAAAGAGCAATACCTCAGGACTAAAGGGACTGAGTTGGAGCAAGGAAAGGGAGATGTGGAGAGGC  
ACTGTAACAGCTGAGGGTAAACAGCATAACTTTTCGTAGTAGAGATCTATTGGAAGTTCGTTGCGTGGATTTATAGA  
TAGGAGGGAATTGCATGGACAATTCGCACGATTCGATAGTATTTCTTTACCACATCTTGTGACAACCTGTGGG  
AGTAGTGATGGGAACTCGTGTCTCTGACGGACACACGTTCTGTACTGATGCGGAGAAGTGGACTGCTGGTAATGA  
AGACACTAAAGAGAGGGCTTCAAACGGAACCCCTCAGGAGGTAAACCAATGACTTACAACGTGTGGAACCTTCGGGG  
AATCCAATGGACGCTACTCCGCGTTAACTGCGAGAGGAATCTCCAAGGAAACCTGTGAGAAGGCTGGCTACTGGATT  
GCCAAAGTAGACGGTGTGATGTACCAAGTGGCTGACTATCGGGACCAGAACGGCAACATTGTGAGTCAGAAGGTTTCG  
AGATAAAGATAAGAACTTTAAGACCCTGGTAGTCACAAGAGTGACGCTCTGTTTCGGGAAGCACTTGTGGAATGGTG  
GTAAGAAGATTGTGTTACAGAAGGTGAAATCGACATGCTTACCCTGATGGAACCTCAAGACTGTAAGTATCCTGTA  
GTGTCGTTGGGTACGGTGCCTCTGCCGCTAAGAAGACATGCGCTGCCAACTACGAATACTTTGACCAGTTTCAACA  
GATTATCTTAATGTTTCGATATGGACGAAGCAGGGCGCAAAGCAGTCAAGAGGCTGCACAGGTTCTACCTGCTGGTA  
AGGTACGAGTGGCAGTTCTTCCGTGTAAGGATGCAAACGAGTGTACCTAAATGGTACGACCGTCAAATCATGGAG  
CAAGTGTGGAATGCTGGTCTTGGATTCTGATGGTGTGGTATCGGCTCTTTCGTTACGTGAACGAATCCGTGAGCA  
CCTATCGTCCGAGGAATCAGTAGGTTTACTTTTTCAGTGGCTGCACTGGTATCAACGATAAGACCTTAGGTGCCCGTG  
GTGGTGAAGTCATTATGGTCACTTCCGGTTCGGGTATGGGTAAGTCAACGTTTCGTTCCGTCAACAAGCTCTACAATGG  
GGCACAGCGATGGGCAAGAAGGTAGGCTTAGCGATGCTTGAGGAGTCCGTTGAGGAGACCGCTGAGGACCTTATAGG  
TCTACACAACCGTGTCCGACTGAGACAATCCGACTCACTAAAGAGAGAGATTATTGAGAACGGTAAGTTCGACCAAT  
GGTTCGATGAACTGTTTCGGCAACGATAACGTTCCATCTATATGACTCATTTCGCCGAGGCTGAGACGGATAGACTGCTC  
GCTAAGCTGGCCTACATGCGCTCAGGCTTGGGCTGTGACGTAATCATTCTAGACCACATCTCAATCGTTCGTATCCGC  
TTCTGGTGAATCCGATGAGCGTAAGATGATTGACAACCTGATGACCAAGCTCAAAGGGTTCGCTAAGTCAACTGGG  
TGGTGTGGTTCGTAATTTGTACCTTAAGAACCCAGACAAAGGTAAGCACATGAGGAAGGTCGCCCCGTTTCTATT  
ACTGACCTACGTGGTTCTGGCGCACTACGCCAACTATCTGATACTATTATTGCCCTTGAGCGTAATCAGCAAGGCGA  
TATGCCATAACCTTGTCTCGTTTCGTAATTCTCAAGTCCGCTTTACTGGTGATACTGGTATCGCTGGCTACATGGAAT  
ACAACAAGGAAACCGGATGGCTTGAACCATCAAGTTACTCAGGGGAAGAAGAGTCACTCAGAGTCAACAGACTGG  
TCCAACGACACTGACTTCTGACAGGATTCTTGATGACTTTCAGACGACTACGAGAAGTTTCGCTGGAGAGTCCCAT  
TCTAATACGACTCACTAAAGGAGACACACCATGTTCAAACGATTAAGAAGTTAGGCCAACTGCTGGTTTCGTATGTA  
CAACGTGGAAGCCAAGCGACTGAACGATGAGGCTCGTAAAGAGGCCACACAGTCAACGCGCTCTGGCGATTTCGCTCCA  
ACGAACTGGCTGACAGTGCATCCACTAAAGTTACCGAGGCTGCCCGTGTGGCAAACCAAGCTCAACAGCTTTCCAAA  
TTCTTTGAGTAATCAAACAGGAGAAACCATTATGTCTAACGTAGCTGAAACTATCCGTCTATCCGATACAGCTGACC  
AGTGAACCGTCCAGTCCACATCAACGTTTCGCAACGGTAAGGCGACTATGGTTTACCGCTGGAAGGACTCTAAGTCC  
TCTAAGAATCACACTCAGCGTATGACGTTGACAGATGAGCAAGCACTGCGTCTGGTCAATGCGCTTACCAAAGCTGC

CGTGACAGCAATTCATGAAGCTGGTTCGCGTCAATGAAGCTATGGCTATCCTCGACAAGATTGATAACTAAGAGTGGT  
ATCCTCAAGGTCGCCAAAGTGGTGGCCTTCATGAATACTATTCTACTCACTATAGGAGATATTACCATGCGTGACCC  
TAAAGTTATCCAAGCAGAAATCGCTAAACTGGAAGCTGAACTGGAGGACGTTAAGTACCATGAAGCTAAGACTCGCT  
CCGCTGTTTACATCTTGAAGAAGTTAGGCTGGACTTGGACAAGACAGACTGGCTGGAAGAAACCAGAAGTTACCAAG  
CTGAGTCATAAGGTGTTTCGATAAGGACACTATGACCCACATCAAGGCTGGTGATTGGGTTAAGGTTGACATGGGAGT  
TGTTGGTGGATACGGCTACGTCCGCTCAGTTAGTGGCAAATATGCACAAGTGTACATACATCACAGGTGTTACTCCAC  
GCGGTGCAATCGTTGCCGATAAGACCAACATGATTACACACAGGTTTCTTGACAGTTGTTTCATATGAAGAGATTGTT  
AAGTCACGATAATCAATAGGAGAAATCAATATGATCGTTTCTGACATCGAAGCTAACGCCCTCTTAGAGAGCGTAC  
TAAGTTCCTACTGCGGGGTTATCTACGACTACTCCACCGCTGAGTACGTAAGCTACCGTCCGAGTGACTTCGGTGCCT  
ATCTGGATGCGCTGGAAGCCGAGGTTGCACGAGGCGGCTTATTGTGTTCCACAACGGTCACAAGTATGACGTTCTCT  
GCATTGACCAAACCTGGCAAAGTTGCAATTGAACCGAGAGTTCCACCTTCTCGTGAGAAGTTGATTGACACCCCTTGT  
GTTGTCACGTTTGTATTCAATCCAACCTCAAGGACACCGATATGGGCTTCTGCGTTCCGGCAAGTTGCCCGAAAAC  
GCTTTGGGTCTCACGCTTTGGAGGCGTGGGGTTATCGCTTAGGCGAGATGAAGGGTGAATACAAAGACGACTTTAAG  
CGTATGCTTGAAGAGCAGGGTGAAGAATACGTTGACGGAATGGAGTGGTGGAACTTCAACGAAGAGATGATGGACTA  
TAACGTTTACGACGTTGTGGTAACTAAAGCTCTCCTTGAGAAGCTACTCTGACAAAACATTACTTCCCTCTGAGA  
TTGACTTTACGGACGTAGGATACACTACGTTCTGGTACGAAATCCCTTGAGGCCGTTGACATTGAACATCGTGCTGCA  
TGGCTGCTCGCTAAACAAGAGCGCAACGGGTTCCCGTTTGACACAAAAGCAATCGAAGAGTTGTACGTAGAGTTAGC  
TGCTCGCCGCTCTGAGTTGCTCCGTAAATTGACCGAAACGTTCCGGCTCGTGGTATCAGCCTAAAGGTGGCACTGAGA  
TGTTCTGCCATCCGCGAACAGGTAAGCCACTACCTAAATACCCTCGCATTAAAGACACCTAAAGTTGGTGGTATCTTT  
AAGAAGCCTAAGAACAAGGCACAGCGAGAAGGCCGTTGAGCCTTGCGAACTTGATACCCGCGAGTACGTTGCTGGTGC  
TCCTTACACCCCAGTTGAACATGTTGTGTTAACCCTTCTGCTCGTGACCACATTGAGAAGAACTCCAAGAGGCTG  
GGTGGGTCCCAGCAAGTACACCGATAAGGGTGTCTCTGTGGTGGACGATGAGGTAAGGAGTACGTTGATGATGAT  
GACCCTGAGAAGCAAGCCGCTATCGACCTCATTAAAGAGTACTTGTATGATTGAGAAGCGAATCGGACAGTCTGCTGA  
GGGAGACAAAGCATGGCTTTCGTTATGTTGCTGAGGATGGTAAGATTGATGGTTCTGTTAACCCCTAATGGAGCAGTTA  
CGGGTTCGTGCGACCCATGCGTTCCCAAACCTTGCAGCAATTCGGGTGTACGTTCTCCTTATGGAGAGCAGTGTGCG  
GCTGCTTTTGGCGCTGAGCACCATTGGATGGGATAACTGGTAAGCCTTGGGTTTCCGGCTGGCATCGACGCATCCGG  
TCTTGAGCTACGCTGCTTGGCTCACTTTCATGGCTCGCTTGTATAACGGCGAGTACGCTCACGAGATTCTTAACGGCG  
ACATCCACACTAAGAACAGATAGCTGCTGAACACTACCCGAGATAACGCTAAGACGTTTATCTATGGGTTCCCTC  
TATGTTGCTGGTGTATGAGAAGATTGGACAGATTGTTGGTGTGCTGGTAAAGAGCGCGGTAAGGAACTCAAGAAGAAAT  
CCTTGGAAACACCCCGCATTGACGACTCCGCGAGTCTTCAACAGACACTTGTGAGTCTCTCAATGGGTAG  
CTGGTGAGCAACAAGTCAAGTGGAAACGCCGCTGGATTAAGGCTGGATGGTTCGTAAGGTACACGTTTCGTAGTCTCT  
CACGCTGCCTTGAATACCCTACTGCAATCTGCTGGTGTCTCATCTGCAAACGTGGGATTATCAAGACCGAAGAGAT  
GCTCGTAGAGAAAGGCTTGAAGCATGGCTGGGATGGGACTTTGCGTACATGGCATGGGTACATGATGAAATCCAAG  
TAGGCTGCCGTACCGAAGAGATTGCTCAGGTGGTCATTGAGACCGCACAGAAGCGATGCGCTGGGTTGGAGACCAC  
TGGAACCTCCGGTGTCTTCTGGATACCGAAGGTAAGATGGGTCTAATTGGGCGATTTGCCACTGATACAGGAGGCT  
ACTCATGAACGAAAGACACTTAACAGGTGCTGCTTCTGAAATGCTAGTAGCCTACAAATTTACCAAAGCTGGGTACA  
CTGTCTATTACCCTATGCTGACTCAGAGTAAAGAGGACTTGGTTGTATGTAAGGATGGTAAATTTAGTAAGGTTTCAG  
GTTAAAACAGCCACAACGGTTCAAACCAACACAGGAGATGCCAAGCAGGTTAGGCTAGGTGGATGCGGTAGGTCCGA  
ATATAAGGATGGAGACTTTGACATTCTTGCGGTTGTGGTTGACGAAGATGTGCTTATTTTTCATGAGGACGAAGTAA  
AAGGTAAGACATCCATGTGTGTGCGCAAGAGAAACAAAGGCATAAAACTATAGGAGAAATTTATGAGGCTATGACAA  
AGAAATTTAAAGTGTCTTTCGACGTTACCGCAAAGATGTGCTGCTGACGTTTCCAGGCAATCTTAGAGAAAGATATGCTG  
CATCTATGTAAGCAGGTCCGGCTCAGGTGCGATTGTCCCAATGGTAAACAGAAGGAAATGATTGTCCAGTTTCTGAC  
ACACGGTATGGAAGGATTGATGACATTTCGTAGTACGTACATCATTTCGTGAGGCCATTAAGGACATGCACGAAGAGT  
ATGCAGATAAGGACTCTTCAAACAATCTCCTGCAACAGTACGGGAGGTGTTCTGATGTCTGACTACCTGAAAGTGC  
TGCAAGCAATCAAAGTTGCCCTAAGACTTCCAGTCCAACATATGTACGGAACAATGCGAGCCTCGTAGCGGAGGCC  
GCTTCCCGTGGTCACATCTCGTGCCTGACTACTAGTGGACGTAACGGTGGCGCTTGGGAAATCACTGCTTCCGGTAC  
TCGCTTTCTGAAACGAATGGGAGGATGTGTCTAATGTCTCGTGACCTTGTGACTATTCCACGCGATGTGTGGAACGA  
TATACAGGGCTACATCGACTCTCTGGAACGTGAGAACGATAGCCTTAAAGAACTCAACTAATGGAAGCTGACGAATACG  
TAGCGGAACTAGAGGAGAACTTAATGGCACTTCTTACCTTAAACAATTTCTATGAGTTACGTGAAGGCTGCGACGA  
CAAGGGTATCCTTGTGATGGACGGCGACTGGCTGGTCTTCCAAGCTATGAGTGTGCTGAGTTTGTATGCTCTTGGG  
AGGAAGAGATTTGGCACCGATGCTGTGACCACGCTAAGGCCCGTACGATTCTTGAGGATTCCATTAAGTCTTACGAG  
ACCCGTAAGAAGGCTTGGGCAGGTGCTCCAATTGTCCTTGCCTTACCGATAGTGTAACTGGCGTAAAGAAGTGGT  
TGACCCGAACATAAGGCTAACCCTAAGGCCGTGAAGAAACCTGTAGGGTACTTTGAGTTCCTTGTATGCTCTCTTTG  
AGCGCGAAGAGTTCTATTGCATCCGTGAGCCTATGCTTGGAGGTGATGACGTTATGGGAGTTATTGCTTCCAATCCG  
TCTGCCTTCCGGTGTGTAAGGCTGTAATCATCTCTTGCAGATAAGGACTTTAAGACCATCCCTAACTGTGACTTCT  
GTGGTGTACCCTGGTAACATCCTGACTCAGACCGAAGAGTCCGCTGACTGGTGGCACCTCTTCCAGACCATCAAGG  
GTGACATCACTGATGGTTACTCAGGGATTGCTGGATGGGGTATACCGCCGAGGACTTCTTGAATAACCCGTTTATA

ACCGAGCCTAAAACGTCTGTGCTTAAGTCCGGTAAGAACAAAGGCCAAGAGGTTACTAAATGGGTTAAACGCGACCC  
TGAGCCTCATGAGACGCTTTGGGACTGCATTAAGTCCATTGGCGCGAAGGCTGGTATGACCGAAGAGGATATTATCA  
AGCAGGGCCAAATGGCTCGAATCCTACGGTTCAACGAGTACAACCTTTATTGACAAGGAGATTTACCTGTGGAGACCG  
TAGCGTATATTGGTCTGGGTCTTTGTGTTCTCGGAGTGTGCCTCATTTTCGTGGGGCCTTTGGGACTTAGCCAGAATA  
ATCAAGTCGTTACACGACACTAAGTGATAAACTCAAGGTCCCTAAATTAATACGACTCACTATAGGGGAGATAGGGGC  
CTTTACGATTATTACTTTAAGATTTAACTCTAAGAGGAATCTTTATTATGTTAACACCTATTAACCAATTACTTAAG  
AACCTAACGATATTCCAGATGTACCTCGTGCAACCGCTGAGTATCTACAGGTTTCGATTCAACTATGCGTACCTCGA  
AGCGTCTGGTCATATAGGACTTATGCGTGCTAATGGTTGTAGTGAGGCCACATCTTGGGTTTCATTACAGGGCCTAC  
AGTATGCCTCTAACGTCATTGACGAGATTGAGTTACGCAAGGAACAACCTAAGAGATGATGGGGAGGATTGACACTAT  
GTGTTTCTCACCAGAAAATAAAACCTCCGAAGATGGATAACCAATCAGATTCGAGCCGTTGAGCCAGCGCCTCTGACCC  
AAGAAGTGTCAAGCGTGGAGTTTCGGTGGGTCTTCTGATGAGACGGATACCAGGGCCACCGAAGTGTCTGGACGCAAA  
GGCCTCAAGGTCGAACGTGATGATTCCGTAGCGAAGTCTAAAGCCAGCGGCAATGGCTCCGCTCGTATGAAATCTTC  
CATCCGTAAGTCCGCATTTGGAGGTAAGAAGTGATGTCTGAGTTCACATGTGTGGAGGCTAAGAGTCGCTTCCGTGC  
AATCCGGTGGACTGTGGAACACCTTGGGTTGCCTAAAGGATTTCGAAGGACACTTTGTGGGCTACAGCCTCTACGTAG  
ACGAAGTGATGGACATGTCTGGTTGCCGTGAAGAGTACATTCTGGACTCTACCGGAAAACATGTAGCGTACTTCCGCG  
TGGTGCCTAAGCTGTGACATTCACCACAAAGGAGACATTCTGGATGTAACGTCCGTTGTCATTAATCCTGAGGCAGA  
CTCTAAGGGCTTACAGCGATTCTAGCGAAACGCTTTAAGTACCTTGCAGAACTCCACGATTGCGATTGGGTGTCTC  
GTTGTAAGCATGAAGGCGAGACAATGCGTGTATACTTTAAGGAGGTATAAGTTATGGGTAAGAAAGTTAAGAAGGCC  
GTGAAGAAAGTCACCAAGTCCGTTAAGAAAGTCGTTAAGGAAGGGGCTCGTCCGTTAAACAGGTTGCTGGCGGTCT  
AGCTGGTCTGGCTGGTGGTACTGGTGAAGCACAGATGGTGAAGTACCACAAGCTGCCGCACAGATTGTTGACGTAC  
CTGAGAAAGAGGTTTCCACTGAGGACGAAGCACAGACAGAAAGCGGACGCAAGAAAGCTCGTGTGGCGGTAAGAAA  
TCCTTGAGTGTAGCCCGTAGCTCCGGTGGCGGTATCAACATTTAATCAGGAGGTTATCGTGGAAGACTGCATTGAAT  
GGACCGGAGGTGTCAACTCTAAGGGTTATGGTCGTAAGTGGGTTAATGGTAAACTTGTGACTCCACATAGGCACATC  
TATGAGGAGACATATGGTCCAGTTCCAAACAGGAATTGTGGTGATGCATATCTGCGATAACCCCTAGGTGCTATAACAT  
AAAGCACCTTACGCTTGGAACTCCAAAGGATAATTCCGAGGACATGGTTACCAAAGGTAGACAGGCTAAAGGAGAGG  
AACTAAGCAAGAACTTACAGAGTCAGACGTTCTCGCTATACGCTCTTCAACCTTAAGCCACCGCTCCTTAGGAGAA  
CTGTATGGAGTCAGTCAATCAACCATAACGCGAATACTACAGCGTAAGACATGGAGACACATTTAATGGCTGAGAAA  
CGAACAGGACTTGCAGGAGGATGGCGCAAAGTCTGTCTATGAGCGTTTTAAGAACGACCGTGCTCCCTATGAGACACG  
CGCTCAGAATTGCGCTCAATATACCATCCCATCTTCCCTAAGGACTCCGATAACCGCTCTACAGATTATCAAAA  
CTCCGTGGCAAGCCGTGGGCGCTCGTGGTCTGAACAATCTAGCCTTAAGCTCATGCTGGCTCTATTCCCTATGCAG  
ACTTGGATGCGACTTACTATATCTGAATATGAAGCAAAGCAGTTACTGAGCGACCCCGATGGACTCGCTAAGGTCGA  
TGAGGGCCTCTCGATGGTAGAGCGTATCATCATGAACTACATTGAGTCTAACAGTTACCGCGTACTCTCTTTGAGG  
CTCTCAAACAGTTAGTCGTAGCTGGTAACGTCCTGCTGTACCTACCGGAACCGGAAGGGTCAAACCTATAATCCCATG  
AAGCTGTACCGATTGTCTTCTTATGTGGTCCAACGAGACGCATTCGGCAACGTTCTGCAAATGGTGACTCGTGACCA  
GATAGCTTTTGGTGCTCTCCCTGAGGACATCCGTAAGGCTGTAGAAGGTCAAGGTGGTGAGAAGAAAGCTGATGAGA  
CAATCGACGTGTACACTCACATCTATCTGGATGAGGACTCAGGTGAATACCTCCGATACGAAGAGGTGAGGGTATG  
GAAGTCCAAGGCTCCGATGGGACTTATCCTAAAGAGGCTTGCCCATACATCCCGATTCCGATGGTCAGACTAGATGG  
TGAATCCTACGGTCTTTCGTACATTGAGGAATACTTAGGTGACTTACGGTCCCTTGAAAATCTCCAAGAGGCTATCG  
TCAAGATGTCCATGATTAGCTCTAAGGTTATCGGCTTAGTGAATCCTGCTGGTATCACCCAGCCACGCCGACTGACC  
AAAGCTCAGACTGGTGACTTCGTTACTGGTCTCCAGAAGACATCTCGTTCCTCCAAGTGGAGAAGCAAGCAGACTT  
TACTGTAGCTAAAGCCGTAAGTGACGCTATCGAGGCTCGCCTTTTCGTTTGCCTTTATGTTGAACTCTGCGGTTTACG  
GTACAGGTGAACGTGTGACCGCCGAAGAGATTCCGGTATGTAGCTTCTGAACTTGAAGATACTTTAGGTGGTGTCTAC  
TCTATCCTTTCTCAAGAATTACAATTGCCTCTGGTACGAGTGTCTTGAAGCAACTACAAGCCACGCAACAGATTCC  
TGAGTTACCTAAGGAAGCCGTAGAGCCAACCATTAGTACAGGTCTGGAAGCAATTGGTCGAGGACAAGACCTTGATA  
AGCTGGAGCGGTGTGTCACTGCGTGGGCTGCCTGGCACCTATGCGGGACGACCCTGATATTAACCTTGCATGATT  
AAGTATACGATTGCCAACGCTATCGGTATTGACACTTCTGGTATTCTACTCACCGAAGAACAGAAGCAACAGAAGAT  
GGCCCAACAGTCTATGCAAATGGGTATGGATAATGGTGTCTGTGCGCTGGCTCAAGGTATGGCTGCACAAGCTACAG  
CTTACCTGAGGCTATGGCTGTGCCGCTGATTCCGTAGGTTTACAGCCGGAATTTAATACGACTCACTATAGGGA  
GACCTCATCTTTGAAATGAGCGATGACAAGAGGTTGGAGTCTCGGTCTTCTGTAGTTCAACTTTAAGGAGACAAT  
AATAATGGCTGAATCTAATGCAGACGTATATGCATCTTTTGGCGTGAACCTCCGCTGTGATGTCTGGTGGTTCCGTTG  
AGGAACATGAGCAGAACATGCTGGCTCTTGATGTTGCTGCCCGTGTATGGCGATGATGCAATCGAGTTAGCGTCAGAC  
GAAGTGGAAACAGAACGTGACCTGTATGACAACCTCTGACCCGTTCCGGTCAAGAGGATGACGAAGGCCGATTCAGGT  
TCGTATCCGGTGTATGGCTCTGAGCCGACCGATGTGGACACTGGAGAAGAAGGCGTTGAGGGCACCGAAGGTTCCGAAG  
AGTTTACCCCACTGGGCGAGACTCCAGAAGAAGTGGTAGCTGCCTCTGAGCAACTTGGTGAGCACGAAGAGGGCTTC  
CAAGAGATGATTAACATTGCTGCTGAGCGTGGCATGAGTGTGAGACCAATTGAGGCTATCCAGCGTGAGTACGAGGA  
GAACGAAGAGTTGTCCGCCGAGTCCACGCTAAGCTGGCTGAAATTTGGCTACACGAAGGCTTTTCATTGACTCGTATA  
TCCGTGGTCAAGAAGCTCTGGTGGAGCAGTACGTAACAGTGTCTATTGAGTACGCTGGTGGTCTGTAACGTTTTGAT

GC ACTGTATAACCACCTTGAGACGCACAACCCTGAGGCTGCACAGTCGCTGGATAATGCGTTGACCAATCGTGACTT  
AGCGACCGTTAAGGCTATCATCAACTTGGCTGGTGGAGTCTCGCGCTAAGGCGTTCGGTCGTAAGCCAACCTCGTAGTG  
TGACTAATCGTGCTATTCCGGCTAAACCTCAGGCTACCAAGCGTGAAGGCTTTGCGGACCGTAGCGAGATGATTAAA  
GCTATGAGTGACCCTCGGTATCGCACAGATGCCAACTATCGTCGTCAAGTCGAACAGAAAGTAATCGATTCGAACTT  
CTGATAGACTTCGAAATTAATACGACTCACTATAGGGGAGACCACAACGGTTTTCCCCCTAGAAATAATTTTTGTTTAA  
TTTAAAGAAGGAGATATACATATGGCTAGCATGACTGGTGGACAGCAAATGGGTACTAACCAGGTAAAGGTGTAGTT  
GCTGCTGGAGATAAACTGGCGTTGTTCTTGAAGGTATTTGGCGGTGAAGTCCTGACTGCGTTCGCTCGTACCTCCGT  
GACCACTTCTCGCCACATGGTACGTTCCATCTCCAGCGGTAAATCCGCTCAGTTCCTGTTCTGGGTGCGACTCAGG  
CAGCGTATCTGGCTCCGGGCGGAGAACCTCGACGATAAACGTAAGGACATCAAACACACCCGAGAAGGTAATCACCATT  
GACGCTCTCCTGACGGCTGACGTTCTGATTTATGATATTGAGGACGCGATGAACCCTACGACGTTCCGCTGTAGTA  
TACCTCTCAGTTGGGTGAATCTCTGGCGATGGCTGCGGATGGTGGCGTTCTGGCTGAGATTGCCGGTCTGTGTAAACG  
TGAAAGCAAATATAATGAGAACATCGAGGGCTTAGGTACTGCTACCGTAATTGAGACCACTCAGAACAAGGCCGCA  
CTTACCACCAAGTTGCGCTGGGTAAGGAGATTATTGCGGCTCTGACTAAGGCTCGTGCGGCTCTGACCAAGAACTA  
TGTTCCGGCTGCTGACCGTGTGTTCTACTGTGACCCAGATAGCTACTCTGCGATTCTGGCAGCACTGATGCCGAACG  
CAGCAAACCTACGCTGCTCTGATTGACCCTGAGAAGGGTCTATCCGCAACGTTATGGGCTTTGAGGTTGTAGAAGTT  
CCGCACCTCACCGCTGGTGGTGTGGTACCCTCGTGAGGGCACTACTGGTCAGAAGCACGCTCTCCCTGCCAATAA  
AGGTGAGGGTAATGTCAAGGTTGCTAAGGACAACGTTATCGGCCTGTTTCATGCACCGCTCTGCGGTAGGTACTGTTA  
AGCTGCGTGACTTGGCTCTGGAGCGCGCTCGCCGTGCTAACTTCCAAGCGGACCAGATTATCGCTAAGTACGCAATG  
GGCCACGGTGGTCTTCGCCCAGAAGCTGCAGGAGCTGTCTGATTCCAGTCAGGTGTGATGCTCGGGGATCCGAATTC  
GAGCTCCGTCTAATACGACTCACTATAGCTAAACATTAATCATTTAAAATAAGGAGGTAAAGCATGAAATATCTTCT  
GCCTACGGCTGCCACGGGTTTTGTTACTGCTTGCAGCTCAGCCAGCGGTGCGCATGGTATTACACTGGAGGATTTTG  
TCGGTGACTGGCGCCAGACTGCTGGATATAATCTTGATCAAGTGCTGGAGCAAGGAGGCGTCTCAAGCCTTTTCCAG  
AATTTAGGTGTTAGCGTCACACCGATTCAACGTATCGTGCTGAGTGGGGAGAACGGCTTAAAAATCGACATCCACGT  
CATCATTCCATATGAAGGGTTGTCAGGGGATCAGATGGGTGAGATTGAAAAGATTTTTAAGGTTGTCTACCCAGTAG  
ACGACCATCACTTCAAGGTTATTTTACACTACGGTACATTAGTAATTGACGGCGTGACTCCTAACATGATTGACTAT  
TTTGGACGCCCCGTATGAGGGGATTGCAGTGTTCGACGGCAAGAAGATCACAGTTACGGGGACTCTGTGGAATGGGAA  
TAAAATTATCGACGAGCGTCTGATTAACCCCGATGGCTCTCTGTTGTTCCGTGTCACTATTAACGGTGTACGGGCT  
GGCGCCTTTGTGACAGCATTTTAGCAGGCTCGAGCGGCCCTACGTGAGTCCGGCCGGTTCGCAAGTTTTATGGGGG  
GTCAACCAAGTGAACACAGGCTTTACGGCGAACGTTACTGTCAAGAACAACAAGCTCCGCTCCGTGGATGGTGGAC  
ACTGACCTTTTTCTTTCCCTCAGGTGACCAAGTGCAGGCGGTGGAGTTCTACGGTTACCAACTCTGGTTCTGCTG  
TTACTGTCCGTAACGCGCCCTGGAATGGAAGCATCCAGCGGGCGGGACCACAGTTTTGGCTTCAATGGCTCTCAT  
ACAGGGACAACGCGAGCACCAACAGCATTTCCTTGAATGGAACCCCTTGCACTGTGCGATAAGCTTGCGGCCGCAC  
TCGAGTAAGTATGAAACCCCTTGGGGCCTCTAAACGGGTCTTGAGGGGTTTTTTGCTGAAAGGAGGAACATATGCG  
CTCATAAGATATGAACGTTGAGACTGCCGCTGAGTTATCAGCTGTGAACGACATTCTGGCGTCTATCGGTGAACCTC  
CGGTATCAACGCTGGAAGGTGACGCTAACGCAGATGCAGCGAACGCTCGGCGTATTCTCAACAAGATTAACCGACAG  
ATTCATCTCGTGGATGGACGTTCAACATTGAGGAAGGCATAACGCTACTACCTGATGTTTACTCCAACCTGATTGT  
ATACAGTGACGACTATTTATCCCTAATGTCTACTTCCGGTCAATCCATCTACGTTAACCGAGGTGGCTATGTGTATG  
ACCGAACGAGTCAATCAGACCGCTTTGACTCTGGTATTACTGTGAACATTATTCTGCTCTCCGCGACTACGATGAGATG  
CCTGAGTGCTTCCGTTACTGGATTGTACCAAGGCTTCCCGTCAAGTCAACAACCGATTCTTTGGGGCACCGGAAGT  
AGAGGGTGTACTCCAAGAAGAGGAAGATGAGGCTAGACGCTCTCTGCATGGAGTATGAGATGGACTACGGTGGGTACA  
ATATGCTGGATGGAGATGCGTTCACTTCTGGTCTACTGACTCGCTAACATTAATAAATAAGGAGGCTCTAATGGCAC  
TCATTAGCCAATCAATCAAGAACCTGAAAGGGTGGTATCAGCCAACAGCCTGACATCCTTCCGTTATCCAGACCAAGGG  
TCACGCCAAGTTAACGGTTGGTCTTCCGAGACCGAGGGCCTCCAAAAGCGTCCACCTCTTGTTTTTCTTAAATACACT  
TGGAGACAACGGTGCCTTAGGTCAAGCTCCGTACATCCACCTGATTAACCGAGATGAGCACGAACAGTATTACGCTG  
TGTTCACTGGTAGCGGAATCCGAGTGTTCGACCTTCTGGTAACGAGAAGCAAGTTAGGTATCCTAACGGTTCCAAC  
TACATCAAGACCGCTAATCCACGTAACGACCTGCGAATGGTACTGTAGCAGACTATAACGTTTCTGTTAACCGTAA  
CGTTGTTGCACAGAAGAACAACAAGTCTGTCAACTTACCAGATTACAACCCCTAATCAAGACGGATTGATTAACGTTT  
GTGGTGGTCAAGTATGGTAGGGAACATAATTGTACACATTAACGGTAAAGACGTTGCGAAGTATAAGATACCAGATGGT  
AGTCAACCTGAACACGTAACAATACGGATGCCAATGGTTAGCTGAAGAGTTAGCCAAGCAGATGCGCACTAACTT  
GTCTGATTGGACTGTAAATGTAGGGCAAGGGTTCATCCATGTGACCGCACCTAGTGGTCAACAGATTGACTCCTTCA  
CGACTAAAGATGGCTACGCGAGACAGTTGATTAACCCCTGTGACCCACTACGCTCAGTCTGTTCTCTAAGCTGCCACCT  
AATGCTCCTAACGGCTACATGGTGAATAATCGTAGGGGACGCTCTAAGTCTGCCGACCAGTATTACGTTCCGGTATGA  
CGCTGAGCGGAAAGTTTGGACTGAGACTTTAGGTTGGAACACTGAGGACCAAGTTCTATGGGAAACCATGCCACACG  
CTCTTGTGCGAGCCGCTGACGGTAATTTGACTTCAAGTGGCTTGAGTGGTCTCCTAAGTCTTGTGGTACGTTGAC  
ACCAACCTTTGGCCTTCTTTTTGTTGGTTCAAGTATTAACGATGTGTTCTTCTCCGTAACCGCTTAGGATTCTTAG  
TGGGGAGAACATCATATTGAGTCGTACAGCCAAATACTTCAACTTCTACCCTGCGTCCATTGCGAACCTTAGTGATG  
ACGACCCTATAGACGTAGCTGTGAGTACCAACCGAATAGCAATCCTTAAGTACGCCGTTCCGTTCTCAGAAGAGTTA

CTCATCTGGTCCGATGAAGCACAAATTCGTCCTGACTGCCTCGGGTACTCTCACATCTAAGTCGGTTGAGTTGAACCT  
AACGACCCAGTTTGGACGTACAGGACCGAGCGAGACCTTTTGGGATTGGGCGTAATGTCTACTTTGCTAGTCCGAGGT  
CCAGCTTACAGTCCATCCACAGGTACTACGCTGTGCAGGATGTCAGTTCGGTTAAGAATGCTGAGGACATTACATCA  
CACGTTCCCTAACTACATCCCTAATGGTGTGTTGAGTATTTGCGGAAGTGGTACGGAAAACCTTCTGTTCCGGTACTATC  
TCACGGGGACCCCTAGTAAAATCTTTCATGTACAAATTCCTGTACCTGAACGAAGAGTTAAGGCAACAGTTCGTGGTCTC  
ATTGGGACTTTGGGGAAAACGTACAGGTTCTAGCTTGTGAGAGTATCAGCTCAGATATGTATGTGATTCTTCCGCAAT  
GAGTTCAATACGTTCCCTAGCTAGAATCTCTTTCACTAAGAACGCCATTGACTTACAGGGGAGAACCCTATCGTGCCTT  
TATGGACATGAAGATTCGATACACGATTCCCTAGTGGAAACATACAACGATGACACATTCACTACCTCTATTTCATATTC  
CAACAATTTATGGTGCAAACCTTCGGGAGGGGCAAAATCACTGTATTGGAGCCTGATGGTAAGATAAACCGTGTGTTGAG  
CAACCTACGGCTGGGTGGAATAGCGACCCCTTGGCTGAGACTCAGTGGTAACCTGGAGGGACGCTGGTGTACATTTGG  
GTTCAACATTAACCTTCGTATATGAGTTCTCTAAGTTCTCATCAAGCAGACTGCCGACGACGGGTCTACCTCCACGG  
AAGACATTGGGCGCTTACAGTTACGCCGAGCGTGGGTTAACTACGAGAACTCTGGTACGTTTGCATTTATGTTGAG  
AACCAATCGTCTAACTGGAAGTACACAATGGCTGGTGCCCGATTAGGCTCTAACACTCTGAGGGCTGGGAGACTGAA  
CTTAGGGACCGGACAATATCGATTCCCTGTGGTTGGTAACGCCAAGTTCAACACTGTATACATCTTGTGAGATGAGA  
CTACCCCTCTGAACATCATTGGGTGTGGCTGGGAAGGTAACACTTACGGAGAAGTTCCGGTATTTAATTAATTAAT  
CTCCCTGTGGTGGCTCGAAATTAATACGACTCACTATAGGGAGAACAATACGACTACGGGAGGGTTTTCTTATGATG  
ACTATAAGACCTACTAAAAGTACAGACTTTGAGGTATTCACTCCGGCTCACCATGACATTCTTGAAGCTAAGGCTGC  
TGGTATTGAGCCGAGTTTTCCCTGATGCTTCCGAGTGTGTACGTTGAGCCTCTATGGGTTCCCTCTAGCTATCGGTG  
GTAACCTGCGGGGACCAGTGTGTTTCGTTACGAGCGACCAAGTGTGGCGACTTAGTGGAAAGGCTAAGCGAAAGTTC  
CGTAAGTTAATCATGGAGTATCGCGATAAGATGCTTGAGAAGTATGATACTCTTTGGAATTACGTATGGGTAGGCAA  
TACGTCCACATTCGTTTCTCAAGACTATCGGTGCGGTATTCCATGAAGAGTACACACGAGATGGTCAATTTTCAGT  
TATTTACAATCACGAAAGGAGGATAAACCATATGTGTTGGGCGCCGCAATACCTATCGCTATATCTGGCGCTCAGGC  
TATCAGTGGTCAGAACGCTCAGGCCAAAATGATTGCCGCTCAGACCGCTGCTGGTTCGTTCGTCAGCTATGGAAATCA  
TGAGGCAGACGAACATCCAGAATGCTGACCTATCGTTGCAAGCTCGAAGTAAACTTGAGGAAGCGTCCGCCGAGTTG  
ACCTCACAGAACATGCAGAAGGTCCAAGCTATTGGGTCTATCCGAGCGGCTATCGGAGAGAGTATGCTTGAAGGTTT  
CTCAATGGACCGCATTAAGCGAGTACAGAAGGACAGTTTATTCCGGGAAGCCAATATGGTAACTGAGAACTATCGCC  
GTGACTACCAAGCAATCTTCGCACAGCAACTTGGTGGTACTCAAAGTGTGCAAGTCAGATTGACGAAATCTATAAG  
AGCGAACAAGAAACAGAAGATAAGCTACAGATGGTCTTGAGCCCACTATCGCTATCATGGGGTCTCCGGTCCGAGTGC  
TTACGCATCCGGTGCCTTCGACTCTAAGTCCACAACCTAAGGCACCTATTGTTGCCGCTAAAGGAACCAAGACGGGGA  
GGTAATGAGCTATGAGTAAAATTGAATCTGCCCTTCAAGCGGCACAACCGGGACTCTCTCGGTTACGTGGTGGTGTCT  
GGAGGTATGGGCTATCGTGCAGCAACCCTCAGGCCGAACAGCCAAGGTCAAGCCTATTGGACACCATTGGTTCGGTT  
CGCTAAGGCTGGTGCCGATATGTATACCGCTAAGGAACAACGAGCACGAGACCTAGCTGATGAACGCTCTAACGAGA  
TTATCCGTAAGCTGACCCCTGAGCAACGTCGAGAAGCTCTCAACAACGGGACCCCTTCTGTATCAGGATGACCCATAC  
GCTATGGAAGCACTCCGAGTCAAGACTGGTTCGTAACGCTGCGTATCTTGTGGACGATGACGTTATGCAGAAGATAAA  
AGAGGGTGTCTTCCGTAAGTACTCGCGAAGAGATGGAAGAGTATCGCCATAGTGCCTTCAAGAGGGCGCTAAGGTATACG  
CTGAGCAGTTCGGCATCGACCCTGAGGACGTTGATTATCAGCGTGGTTTTCAACGGGGACATTACCGAGCGTAACATC  
TCGCTGTATGGTGCATGATAACTTCTTGGAGCCAGCAAGCTCAGAAGGGCGCTATCATGAACAGCCGAGTGGAACT  
CAACGGTGTCTTCAAGACCCTGATATGCTGCGTCCGACTCTGCTGACTTCTTTGAGAAGTATATCGACAACG  
GTCTGGTTACTGGCGCAATCCCATCTGATGCTCAAGCCACACAGCTTATAAGCCAAGCGTTTCAGTGACGCTTCTAGC  
CGTGCTGGTGGTGTGACTTCTGATGCGAGTCCGGTACAAGAAGGTAACACTTAACGGAGCCACTACGACTTACCG  
AGAGTTGATTGGTGAGGAACAGTGGAAACGCTCTCATGGTACAGCACAAACGTTTCTCAGTTTGGAGACTGACGCGAAGC  
TGAACGAGCAGTATCGCTTGAAGATTAACCTCTGCGCTGAACCAAGAGGACCCAAAGGACAGCTTGGGAGATGCTTCAA  
GGTATCAAGGCTGAACTAGATAAGGTCCAACCTGATGAGCAGATGACACCACAACGTGAGTGGCTAATCTCCGCACA  
GGAACAAGTTCAGAATCAGATGAACGCATGGACGAAAGCCCAGGCCAAGGCTCTGGACGATTCCATGAAGTCAATGA  
ACAACTTGACGTAATCGACAAGCAATCCAGAAGCGAATCAACGGTGGTGGTCTCAACGGATTTTAAGGATATG  
CCAGTCAACGAGAACACTGGTGGTCAAGCATATGCTGATGTTAAGTCAAGTCAAGTCAAGTCAAGTCAAGTCAAGTCAAGT  
CAGTATGGACATTTCCAGACGGTCCCAAGGATGCTATGAAGTTGAAGTACCTTCAAGCGGACTCTAAGGACGGAGCAT  
TCCGTACAGCCATCGAAACCATGGTCACTGACGCTGGTCAAGAGTGGTCTGCCGCTGTGATTAACGGTAAGTTACCA  
GAACGAACCCAGCTATGGATGCTCTGCGCAGAATCCGCAATGCTGACCCTCAGTTGATTGCTGCGCTATAACCCAGA  
CCAAGCTGAGCTATTCCCTGACGATGGACATGATGGACAAGCAGGGTATTGACCCTCAGGTTATTCTTGGATGCCGACC  
GACTGACTGTTAAGCGGTCCAAAGAGCAACGCTTTGAGGATGATAAAGCATTTCGAGTCTGCACTGAATGCATCTAAG  
GCTCCTGAGATTGCCCGTATGCCAGCGTCACTGCGCGAATCTGCACGTAAGATTTATGACTCCGTTAAGTATCGCTC  
GGGGAACGAAAGCATGGCTATGGAGCAGATGACCAAGTTTCTTAAAGGAATCTACCTACACGTTCACTGGTGTATGATG  
TTGACGGTGTATACCGTTGGTGTGATTCTTAAGAATATGATGCAGGTTAACTCTGACCCGAAATCATGGGAGCAAGGT  
CGGGATATTCTGGAGGAAGCACGTAAGGGAATCATTGCGAGCAACCCCTGGATAACCAATAAGCAACTGACCATGTA  
TTCTCAAGGTGACTCCATTTACCTTATGGACACCACAGGTCAAGTCAAGTCCGATACGACAAAGAGTTACTCTCGA  
AGGTCTGGAGTGAGAACCAGAAGAACTCGAAGAGAAAGCTCGTGAGAAGGCTCTGGCTGATGTGAACAAGCGAGCA

CCTATAGTTGCCGCTACGAAGGCCCGTGAAGCTGCTGCTAAACGAGTCCGAGAGAAACGTAAACAGACTCCTAAGTT  
CATCTACGGACGTAAGGAGTAACTAAAGGCTACATAAGGAGGCCCTAAATGGATAAGTACGATAAGAACGTACCAAG  
TGATTATGATGGTCTGTTCCAAAAGGCTGCTGATGCCAACGGGGTCTCTTATGACCTTTTACGTAAAGTCGCTTGGA  
CAGAATCACGATTTGTGCCTACAGCAAAATCTAAGACTGGACCATTAGGCATGATGCAATTTACCAAGGCAACCGCT  
AAGGCCCTCGGTCTGCGAGTTACCGATGGTCCAGACGACGACCGACTGAACCCTGAGTTAGCTATTAATGCTGCCGC  
TAAGCAACTTGCAGGTCTGGTAGGGAAGTTTGATGGCGATGAACTCAAAGCTGCCCTTGCGTACAACCAAGGCGAGG  
GACGCTTGGGTAATCCACAACCTTGAGGCGTACTCTAAGGGAGACTTCGCATCAATCTCTGAGGAGGGACGTAACCTAC  
ATGCGTAACCTTCTGGATGTTGCTAAGTCACCTATGGCTGGACAGTTGGAAACTTTTGGTGGCATAACCCCAAAGGG  
TAAAGGCATTCGGGCTGAGGTAGGATTGGCTGGAATTGGTCACAAGCAGAAAGTAACACAGGAACCTTCTGAGTCCA  
CAAGTTTTGACGTTAAGGGTATCGAACAGGAGCTACGGCGAAACCATTGCGCAAGGACTTTTGGGAGACCCACGGA  
GAAACACTTGACGAGTACAACAGTCGTTCAACCTTCTCGGATTCAAAATGCTGCCGAAGCTGAACTCTCCAACCTC  
AGTCGCTGGGATGGCTTTCCGTGCTGGTCTCGATAATGGTTTTGATGTGTTTAAAGACACCATTACGCCGACTC  
GCTGGAACCTCACATCTGGACTCCAGAGGAGTTAGAGAAGATTGAAACAGAGGTTAAGAACCCTGCGTACATCAAC  
GTTGTAACCTGGTGGTTCCCTGAGAACCTCGATGACCTCATTAAATTGGCTAACGAGAACCTTTGAGAATGACTCCCG  
CGCTGCCGAGGCTGGCCTAGGTGCCAACTGAGTGTGGTATTATTGGTGTGGTGTGGACCCGCTTAGCTATGTTT  
CTATGGTCCGTGCTACTGGTAAGGGCTTTAAGTTAATCAATAAGGCTCTTGTAGTTGGTGGCGAAAGTGTGCTCTG  
AACGTTGCATCCGAAGGTCTCCGTACCTCCGTAGCTGGTGGTACGACGACTATGCGGGTGTGCTTGGTGGCTT  
TGTGTTTTGGCGCAGGCATGTCTGCAATCAGTGACGCTGTAGCTGCTGGACTGAAACGCAGTAAACCAGAAGCTGAGT  
TCGACAATGAGTTCATCGGTCTATGATGCGATTGGAAGCCCGTGAGACAGCACGAAACGCCAATCTGCGGACCTC  
TCTCGGATGAACACTGAGAACATGAAGTTTGAAGGTGAACATAATGGTGTCCCTTATGAGGACTTACCAACAGAGAG  
AGGTGCCGTGGTGTACATGATGGCTCCGTTCTAAGTGCAAGCAACCCAATCAACCCTAAGACTCTAAAAGAGTTCT  
CCGAGGTTGACCCTGAGAAGGCTGCGCGAGGAATCAAACCTGGCTGGGTTACCGGAGATTGGCTTGAAGACCTTGGGG  
TCTGACGATGCTGACATCCGTAGAGTGGCTATCGACCTCGTTCGCTCTCCTACTGGTATGCAGTCTGGTGCCTCAGG  
TAAGTTCGGTGCAACAGCTTCTGACATCCATGAGAGACTTCATGGTACTGACCAGCGTACTTATAATGACTTGTACA  
AAGCAATGTCTGACGCTATGAAAGACCCTGAGTTCTCTACTGGCGGCGCTAAGATGTCCCGTGAAGAACTCGATAC  
ACTATCTACCGTAGAGCGGCACTAGCTATTGAGCGTCCAGAACTACAGAAGGCACACTCACTCCGTCTGAGAGAATCGT  
TATGGACATCATTAAAGCGTCACTTTGACACCAAGCGTGAACCTATGAAAAACCCAGCAATATTCGGTAACACAAAGG  
CTGTGAGTATCTCCCTGAGAGTCCGCCACAAAGGTACTTACGTTCTCACGTATATGACCGCTCATGCCAAGGCGCTG  
ATGATTCACACGCTACGGTCCGAAGGTTTGCAGGAAGGATTGCCCGCTCATGGATGAACAGTACGCTCTCCAGACC  
TGAGGTCAAGGCCAGAGTCGATGAGATGCTTAAGGAATTACACGGGGTGAAGGAAGTAACACCAGAGATGGTAGAGA  
AGTACGCTATGGATAAGGCTTATGGTATCTCCCACTCAGACCAGTTCACCAACAGTTCATAATAGAAGAGAACATT  
GAGGGCTTAGTAGGTATCGAGAATAACTCATTCCCTTGGGACGTAACCTGTTTTGATTCCGACCTATCCATCACTAT  
GCCAGACGGACAGCAATTCTCAGTGAATGACCTAAGGGACTTCGATATGTTCCGCATCATGCCAGCGTATGACCGCC  
GTGTCAATGGTGACATCGCCATCATGGGGTCTACTGGTAAAACCACTAAGGAACCTAAGGATGAGATTTTGGCTCTC  
AAAGCGAAAGCTGAGGGAGACGGTAAGAAGACTGGCGAGGTACATGCTTTAATGGATACCGTTAAGATTCTTACTGG  
TCGTGCTAGACGCAATCAGGACACTGTGTGGGAAACCTCACTGCGTGCCATCAATGACCTAGGGTCTTCCGCTAAGA  
ACGCCTACATGGGTGCTCAGAACATTACGGAGATTGCTGGGATGATTGTCACTGGTAACGTTTCGTGCTCTAGGGCAT  
GGTATCCCAATTCGCGTGATACACTCTACAAGTCTAAACCAGTTTCAGCTAAGGAACCTAAGGAACCTCCATGCGTC  
TCTGTTCCGGAAGGAGGTGGACCAGTTGATTCCGCCTAAACGTGCTGACATTGTGCAGCGCCTAAGGGAAGCAACTG  
ATACCGGACCTGCCGTGGCGAACATCGTAGGGACCTTGAAGTATTCAACACAGGAACCTGGCTGCTCGCTCTCCGTGG  
ACTAAGCTACTGAACGGAACCACTAACTACCTTCTGGATGCTGCGCGTCAAGGTATGCTTGGGGATGTTATTAGTGC  
CACCTAACAGGTAAGACTACCCGCTGGGAGAAAGAAGGCTTCCCTTCGTGGTGCCTCCGTAACCTCCTGAGCAGATGG  
CTGGCATCAAGTCTCTCATCAAGGAACATATGGTACGCGGTGAGGACGGGAAGTTTACCGTTAAGGACAAGCAAGCG  
TTCTCTATGGACCCACGGGCTATGGACTTATGGAGACTGGCTGACAAGGTAGCTGATGAGGCAATGCTGCGTCCACA  
TAAGGTGTCTTACAGGATTCATGCGTTCGGAGCACTAGGTAAGATGGTTATGCAGTTTAAAGTCTTCTACTATCA  
AGTCCCTTAACTCTAAGTTCTCGCAACCTTCTATGATGGATACAAGAACAACCGAGCGATTGACGCTGCGCTGAGC  
ATCATCACCTCTATGGGTCTCGCTGGTGGTTTTCTATGCTATGGCTGCACACGTCAAAGCATAACGCTCTGCCTAAGGA  
GAAACGTAAGGAGTACTTGGAGCGTGCCTGGACCCAAACCATGATTGCCACGCTGCGTTATCTCGTAGTTCTCAAT  
TGGGTGCTCCTTTGGCTATGGTTGACCTAGTTGGTGGTGTGTTTTAGGGTTTCGAGTCTCCAAGATGGCTCGCTCTACG  
ATTCTACCTAAGGACACCGTGAAGGAACGTGACCCAAACAAACCGTACACCTCTAGAGAGGTAATGGGCGCTATGGG  
TTCAAACCTTCTGGAACAGATGCCTTCGGCTGGCTTTGTGGCTAACGTAGGGGCTACCTTAAATGAATGCTGCTGGCG  
TGGTCAACTCACCTAATAAAGCAACCGAGCAGGACTTCATGACTGGTCTTATGAACTCCACAAAAGAGTTAGTACCG  
AACGACCCATTGACTCAACAGCTTGTGTTGAAGATTTATGAGGCGAACGGTGTAACTTGGGGAGCGTAGGAAATA  
ATACGACTCACTATAGGGAGAGGCGAAATAATCTTCTCCCTGTAGTCTCTTAGATTTACTTTAAGGAGGTCAAATGG  
CTAACGTAATTTAAACCGTTTTGACTTACCAGTTAGATGGCTCCAATCGTGATTTTAAATATCCCGTTTTGAGTATCTA  
GCCCCTAAGTTTCGTAGTGGTAACCTCTTATTGGTGTAGACCGAAAGGTCCTTACGATTAATACAGACTATCGCTTTGC  
TACACGTAATACTATCTCTGACAAAGGCTTGGGGTCCAGCCGATGGCTACACGACCATCGAGTTACGTCGAGTAA

CCTCCACTACCGACCGATTGGTTGACTTTACGGATGGTTCAATCCTCCGCGCGTATGACCTTAACGTCGCTCAGATT  
CAAACGATGCACGTAGCGGAAGAGGCCCGTGACCTCACTACGGATACTATCGGTGTCAATAACGATGGTCACTTGGGA  
TGCTCGTGGTTCGTCGAATTTGTGAACCTAGCGAACGCCGTGGATGACCGCGATGCTGTTCCGTTTTGGTCAACTAAAGA  
CCATGAACCAGAAGCTCATGGCAAGCACGTAATGAAGCCTTACAGTTCGGTAATGAGGCTGAGACTTTCAGAAACCAA  
GCGGAGGGCTTTAAGAACGAGTCCAGTACCAACGCTACGAACACAAAGCAGTGGCAGCGATGAGACCAAGGGTTTTCCG  
AGACGAAGCCAAGCGGTTCAAGAATACGGCTGGTCAATACGCTACATCTGCTGGGAACTCTGCTTCCGCTGCGCATC  
AATCTGAGGTAACGCTGAGAAGCTCTGCCACAGCATCCGCTAACTCTGCTCATTGGCAGAACAGCAAGCAGACCGT  
GCGGAACGTGAGGCAGACAAGCTGGAAAATTACAATGGATTGGCTGGTGAATTGATAAGGTAGATGGAACCAATGT  
GTACTGGAAAGGAAATATTCACGCTAACGGGCGCCTTTACATGACCACAAACGGTTTTGACTGTGGCCAGTATCAAC  
AGTTCTTTGGTGGTGTCACTAATCGTTACTCTGTCTGATGGAGTGGGGAGATGAGAACGGATGGCTAGTGTATGTTCAA  
CGTAGAGATGGACAACAGCAGTATAGGCGGTAACATCCAGTTAGTAGTAAACGGACAGATCATCACCAAGTGGAGC  
CATGACCGGTGACTAAAATTCAGAATGGGCATGTTCTTCAATTAGAGTCCGCATCCGACAAGGCGCACTATATTC  
TATCTAAAGATGGTAACAGGAATAACTGGTACATTGGTAGAGGGTACAGATAACAACAATGACTGTACCTTCCACTCC  
TATGTACATGGTACGACCTTAACACTCAAGCAGGACTATGCAGTAGTTAACAACACTTCCACGTAGGTGAGGCCGT  
TGTGGCCACTGATGGTAATATTCAAGGTAAGTGGGGAGGTAAATGGCTGGATGCTTACCTACGTGACAGCTTCG  
TTGCGAAGTCCAAGGCGTGGACTCAGGTGTGGTCTGGTAGTGTGGCGGTGGGGTAAGTGTGACTGTTTTACAGGAT  
CTCCGCTTCCGCAATATCTGGATTAAGTGTGCCAACACTCTTGGAACTTCTTCCGTAAGTGGCCCCGATGGAATCTA  
CTTCATAGCCTCTGATGGTGGATGGTTACGATTCCAAATACACTCCAACGGTCTCGGATTCAAGAATATTGCAGACA  
GTCGTTCAAGTACCTAATGCAATCATGGTGGAGAACGAGTAATTGGTAAATCACAAGGAAAGACGTGTAGTCCACGGA  
TGGACTCTCAAGGAGGTACAAGGTGCTATCATTAGACTTTAACAACGAATTGATTAAGGCTGCTCCAATTGTTGGGA  
CGGGTGTAGCAGATGTTAGTGTGCTGACTGTTCTTTGGGTTAAGCCTTAACGAATGGTCTACGTTGCTGCTATCGCC  
TACACAGTGGTTCAGATTGGTGCCAAGGTAGTCGATAAGATGATTGACTGGAAGAAAGCCAATAAGGAGTGTATGT  
ATGGAAAAGGATAAGAGCCTTATTACATTCTTAGAGATGTTGGACACTGCGATGGCTCAGCGTATGCTTGGCGACCT  
TTCGGACCATGAGCGTCGCTCTCCGCAACTCTATAATGCTATTAACAACTGTTAGACCGCCACAAGTTCAGATTG  
GTAAGTTGCAGCCGGATGTTACATCTTAGGTGGCCTTGGTGGTCTTGAAGAGTACAAAGAGAAAGTCCGGTGT  
AACGGTCTTACGGATGATGATATTTACACATTACAGTGTATACTCAAGGCCACTACAGATAGTGGTCTTTATGGAT  
GTCATTGTCTATACGAGATGCTCCTACGTGAAATCTGAAAGTTAACGGGAGGCATTATGCTAGAATTTTTACGTAAG  
CTAATCCCTTGGGTTCTCGCTGGGATGCTATTCCGGTTAGGATGGCATCTAGGGTCAGACTCAATGGACGCTAAATG  
GAAACAGGAGGTACCAATGAGTACGTTAAGAGAGTTGAGGCTGCGAAGAGCACTCAAAGACAATCGATGCGGTAT  
CTGCTAAGTATCAAGAAGACCTTGCCGCGCTGGAAGGGACACTGATAGGATTAATTTCTGATTTGCGTAGCGCAAT  
AAGCGGTTGCGCGTCAGAGTCAAACTACCAGAACCTCCGATGGTCAAGTGTGGATTTCGAGCCTGATGGTTCGAGCCGA  
ACTTGACGACCGAGATGCTAAACGTATTCTCGCAGTGACCCAGAAGGGTGACGCATGGATTTCGTGCGTTACAGGATA  
CTATTTCGTGAAGTGAACGTAAGTAGGAAATCAAGTAAGGAGGCAATGTGTCTACTCAATCCAATCGTAATGCGCTC  
GTAGTGGCGCAACTGAAAGGAGACTTCGTGGCGTTTCTATTTCGTCTTATGGAAGGCGCTAAACCTACCAGTGGCCAC  
TAAGTGTGAGATTGACATGGCTAAGGTGCTGGCGAATGGAGACAACAAGAAGTTCATCTTACAGGCTTTCCGTGGTA  
TCGGTAAGTTCGTTTACATCATGTGCGTTCGTTGTGTGGTCTTATGGAGAGACCCTCAGTTGAAGATACTTATCGTA  
TCAGCCTCTAAGGAGCGTGCAGACGCTAACTCCATCTTTATTAAGAACATCATTGACCTGCTGCCATTCTATCTGA  
GTTAAAGCCAAGACCCGGACAGCGTGACTCGGTAATCAGCTTTGATGTAGGCCAGCCAATCCTGACCACTCTCCTA  
GTGTGAAATCAGTAGGTATCACTGGTCAAGTAACTGGTAGCCGTGCTGACATTATCATTGCGGATGACGTTGAGATT  
CCGTCTAACAGCGCAACTATGGGTGCCCGTGAGAAGCTATGGACTCTGGTTCAGGAGTTTCGCTGCGTTACTTAAACC  
GCTGCCTTCTCTCGCGTTATCTACCTTGGTACACCTCAGACAGAGATGACTCTCTATAAGGAACCTTGAGGATAACC  
GTGGGTACACAACCATTATCTGGCCTGCTCTGTACCCAAGGACACGTGAAGAGAACCCTCTATTACTCACAGCGTCTT  
GCTCCTATGTTACGCGCTGAGTACGATGAGAACCCTGAGGCACCTTGCTGGGACTCCAACAGACCCAGTGGCCTTTGA  
CCGTGATGACCTGCGCGAGCGTGAGTTGGAATACGGTAAGGCTGGCTTTACGCTACAGTTCATGCTTAAACCCTAACC  
TTAGTGTGACCGAGAAGTACCCGCTGAGGCTTCGTGACGCTATCGTAGCGGCCTTAGACTTAGAGAAGGCCCAATG  
CATTACCAGTGGCTTCCGAACCGTCAGAACATCATTGAGGACCTTCTTAACGTTGGCCTTAAGGGTGTGACCTGCA  
TACGTACCACGATTGTTCCAAACAACACTCAGGTCACTACCAACAGAAGATTCTGGTCAATTGACCCTAGTGGTTCGCGGTA  
AGGACGAAACAGGTTACGCTGTGCTGTACACACTGAACGGTTACATCTACCTTATGGAAGCTGGAGGTTTTCCGTGAT  
GGCTACTCCGATAAGACCCTTGAGTTACTCGCTAAGAAGGCAAAGCAATGGGGAGTCCAGACGGTTGTCTACGAGAG  
TAACTTCGGTGACGGTATGTTCCGGTAAGGTATTAGTCTTATCTTCTTAAACACCACAACACTGTGCGATGGAAGAGA  
TTCGTGCCCCGTGGTATGAAAGAGATGCGTATTTGCGATAACCCTTGGCCAGTCATGCAGACTCACCGCCTTGTAAAT  
CGTGATGAGGTCATTAGGGCCGACTACCAGTCCGCTCGTGACGTAGACGGTAAGCATGACGTTAAGTACTCGTTGTT  
CTACCAGATGACCCGTATCACTCGTGAGAAAGGCGCTCTGGCTCATGATGACCGATTGGATGCCCTTGGCTTAGGCA  
TTGAGTATCTCCGTGAGTCCATGCAGTTGGATTCCGTTAAGGTCGAGGGTGAAGTACTTGCTGACTTCTTGGAGAA  
CACATGATGCGTCTACGGTTGCTGCTACGCATATCATTGAGATGTCTGTGGGAGGAGTTGATGTGACTCTGAGGA  
CGATGAGGGTTACGGTACGCTTTTCAATTGAGTGGTGATTTATGCATTAGGACTGCATAGGGATGCATATAGACCAC  
GGATGGTCAAGTCTTTAAGTTACTGAAAAGACACGATAAATTAATACGACTCACTATAGGGAGAGGAGGGACGAAAG

GTTACTATATAGATACTGAATGAATACTTATAGAGTGCATAAAGTATGCATAATGGTGTACCTAGAGTGACCTCTAA  
GAATGGTGATTATATTGTATTAGTATCACCTTAACTTAAAGGACCAACATAAAGGGAGGAGACTCATGTTCCGCTTAT  
TGTTGAACCTACTGCGGCATAGAGTACCTACCGATTTCTTGTGGTACTTTGTGCTGCCCTTGGGTACGCATCTCTT  
ACTGGAGACCTCAGTTCAGTGGAGTCTGTCTGTTTTGCTCTATACTCACTTGTAGCGATTAGGGTCTTCTGACCGACT  
GATGGCTCACCGAGGGATTACAGCGGTATGATTGCATCACACCACTTCATCCCTATAGAGTCAAGTCCTAAGGTATAC  
CCATAAAGAGCCTCTAATGGTCTATCCTAAGGTCTATACCTAAAGATAGGCCATCCTATCAGTGTACCTAAAGAGG  
GTCTTAGAGAGGGCCTATGGAGTTCCTATAGGGTCCCTTAAAAATATACCATAAAAAATCTGAGTGACTATCTCACAGT  
GTACGGACCTAAAGTTCCTCCCATAGGGGGTACCTAAAGCCCAGCCAATCACCTAAAGTCAACCTTCGGTTGACCTTG  
AGGGTTCCTAAGGGTTGGGGATGACCCTTGGGTTTTGTCTTTGGGTGTTACTTCCCCCATAGGGGGTACCTAAAGCC  
CAGCCAATCACCTAAAGTCAACCTTCGGTTGACCTTGAGGGTTCCTAAGGGTTGGGGATGACCCTTGGGTTTTGTCT  
TTGGGTGTTACCTTGAAGTGTCTCTGTGTCTGTCTGTCTGTCTGTCTGTCTGTCTGTCTGTCTGTCTGTCTGTCTGTCT  
AACGTCCATCCTAAAGCCAACACCTAAAGCCTACACCTAAAGACCCATCAAGTCAACGCCTATCTTAAAGTTTAAAC  
ATAAAGACCAGACCTAAAGACCAGACCTAAAGACACTACATAAAGACCAGACCTAAAGACGCCTTGTTGTTAGCCAT  
AAAGTGATAACCTTTAATCATTGTCTTTATTAATACAACCTCACTATAAGGAGAGACAACCTTAAAGAGACTTAAAAGA  
TTAATTTAAAATTTATCAAAAAGAGTATTGACTTAAAGTCTAACCTATAGGATACTTACAGCCATCGAGAGGGACAC  
GGCGAATAGCCATCCCAATCGACACCGGGGTCAACCGGATAAGTAGACAGCCTGATAAGTCGCACGAAAAACAGGTA  
TTGACAACATGAAGTAACATGCAGTAAGATACAAATCGCTAGGTAACACTAGCAGCGTCAACCGGGCGCACAGTGCC  
TTCTAGGTGACTTAAGCGCACCCACGGCACATAAGGTGAAACAAAACGGTTGACAACATGAAGTAAACACGGTACGAT  
GTACCACATGAAACGACAGTGAAGTACCACACTGAAAGGTGATGCGGTCTAACGAAACCTGACCTAAGACGCTCTTT  
AACAATCTGGTAAATAGCTCTTGAAGTGCATGACTAGCGGATAACTCAAGGGTATCGCAAGGTGCCCTTTATGATATT  
CACTAATAACTGCACGAGGTAACACAAGATGGCTATGTCTAACATGACTTACAACAACGTTTTTCGACCACGCTTACG  
AAATGCTGAAAGAAAACATCCGTTATGATGACATCCGTGACACTGATGACCTGCACGATGCTATTACATGGCTGCC  
GATAATGCAGTTCGCGCACTACTACGCTGACATCTTTAGCGTAATGGCAAGTGAGGGCATTGACCTTGAGTTTGAAGA  
CTCTGGTCTGATGCCTGACACCAAGGACGTAATCCGCATCCTGCAAGCGCGTATCTATGAGCAATTAACGATTGACC  
TCTGGGAAGACGCAGAAGACTTGCTCAATGAATACTTGGAGGAAGTCGAGGAGTACGAGGAGGATGAAGAGTAATGT  
CTACTACCAACGTGCAATACGGTCTGACCGCTCAAACGTACTTTTCTATAGCGACATGGTGCCTGTGGCTTTAAC  
TGGTCACTCGCAATGGCACAGCTCAAAGAAGTGTACGAAAACAACAAGGCAATAGCTTTAGAATCTGCTGAGTGATA  
GACTCAAGTTCGCTCCTAGCGAGTGGCTTTATGATTACTTTACTTATGAGGGAGTAATGTATATGCTTACTAT  
CGGTCTACTCACCGCTCTAGGTCTAGCTGTAGGTGCATCTTTGGGAAGGCTTTAGGTGTAGCTGTAGGTTCTTACT  
TTACCGTCTGCATCATCATAGGAATCATCAAAGGGGCACCTACGCAAATGATGAAGCACTACGTTATGCCAATCCACA  
CGTCCAACGGGGCAACCGTATGTACACCTGATGGGTTGCAATGAAACAACGAATCGAACGCCTTAAAGCGTGAACCTC  
CGCATTAAACCGCAAGATTAACAAGATAGGTTCCGGCTATGACAGAACGCCTGATGGCTTAAAGAAAGGTTATATGC  
CCAATGGCACACTATACGCTGCAAATCGGCGAATAGTGAGAAGTGGGCGAGAGAACAACCTCGAACGCCGCAAGGAA  
CAAGAGAGGGCGGCGTGGCATAGACGAAAGGAAAAGGTTAAAGCCAAGAAACTCGCCGCACTTGAACAGGCACTAGC  
CAACACACTGAACGCTATCTCATAACGAACATAAAGGACACAATGCAATGAACATTACCGACATCATGAACGCTATC  
GACGCAATCAAAGCACTGCCAATCTGTGAACCTTGACAAGCGTCAAGGTATGCTTATCGACTTACTGGTTCGAGATGGT  
CAACAGCGAGACGTGTGATGGCGAGCTAACCGAATAAATCAGGCCTTGAGCATCAAGATTGGTGGACTACCTTGA  
AGTGTCTCACGGCTGACGCAGGGTTCAAGATGCTCGGTAATGGTCACTTCTCGGCTGCTTATAGTCACCCGCTGCTA  
CCTAACAGAGTGATTAAGGTGGGCTTTAAGAAAGAGGATTGAGGCGCAGCCTATACCGCATTCTGCCGATGTATCA  
GGGTCTGCTGGTATCCCTAACGTCTACGATGTACAGCGCCACGCTGGATGCTATACGGTGGTACTTGACGCACTTA  
AGGATTGCGAGCGTTTTCAACAATGATGCCCATTTATAAATACGCTGAGATTGCAAGCGACATCATTGATTGCAATTTCG  
GATGAGCATGATGAGTTAACTGGATGGGATGGTGAAGTTTGTGAAACTTGTAACCTAATCCGCAAGTTCTTTGAGGG  
CATCGCCTCATTGACATGCATAGCGGGAACATCATGTTCTCAAATGGAGACGTACCATAACATCACCGACCCGGTAT  
CATTCTCGCAGAAGAAAGACGGTGGCGCATTACGATCGACCCTGAGGAACTCATCAAGGAAGTCGAGGAAGTCGCA  
CGACAGAAAGAAATTGACCGCGCTAAGGCCCGTAAAGAAGCTCACGAGGGGCGCTTAGAGGCACGCAGATTCAAACG  
TCGCAACCGCAAGGACGTAAGGCACACAAAGCTAAGCGCGAAAGAATGCTTGTGCTGCGTGGCGATGGGCTGAACGTC  
AAGAACGGCGTAACCATGAGGTAGCTGTAGATGTACTAGGAAGAACCAATAACGCTATGCTCTGGGTCAACATGTTT  
TCTGGGGACTTTAAGGCGCTTGAAGAACGAATCGCGCTGCACTGGCGTAATGCTGACCGGATGGCTATCGCTAATGG  
TCTTACGCTCAACATTGATAAGCAACTTACGCAATGTTAATGGGCTGATAGTCTTATCTTACAGGTCTCTGCGGG  
TGGCCTGAATAGGTACGATTTACTAACTGGAAGAGGCATAAATGAACACGATTAACATCGCTAAGAACGACTTCTC  
TGACATCGAACTGGCTGCTATCCCCTTCAACACTCTGGCTGACCATTACGGTGAAGCGTTTTAGCTCGCGAACAGTTGG  
CCCTTGAGCATGAGTCTTACGAGATGGGTGAAGCACGCTTCCGCAAGATGTTTGAAGCGTCAACTTAAAGCTGGTGA  
GTTGCGGATAACGCTGCCGCCAAGCCTCTCATCACTACCCTACTCCCTAAGATGATTGCACGCATCAACGACTGGTT  
TGAGGAAGTGAAGCTAAGCGCGGCAAGCGCCGACAGCCTTCCAGTTCCTGCAAGAAATCAAGCCGGAAGCCGTAG  
CGTACATCACCATTAAGACCACTCTGGCTTGCCTAACAGTGTGACAATAACAACCGTTTCAAGCTGTAGCAAGCGCA  
ATCGGTTCGGGCCATTGAGGACGAGGCTCGCTTCCGGTGTATCCGTGACCTTGAAGCTAAGCACTTCAAGAAAAACGT  
TGAGGAACAACCTCAACAAGCGCGTAGGGCACGTCTACAAGAAAGCATTATGCAAGTTGTGAGGCTGACATGCTCT

CTAAGGGTCTACTCGGTGGCGAGGCGTGGTCTTCGTGGCATAAGGAAGACTCTATTTCATGTAGGAGTACGCTGCATC  
GAGATGCTCATTGAGTCAACCGGAATGGTTAGCTTACACCGCCAAAATGCTGGCGTAGTAGGTCAAGACTCTGAGAC  
TATCGAACTCGCACCTGAATACGCTGAGGCTATCGCAACCCGTGCAGGTGCGCTGGCTGGCATCTCTCCGATGTTCC  
AACCTTGCCTAGTTCCTCCTAAGCCGTGGACTGGCATTACTGGTGGTGGCTATTGGGCTAACGGTTCGTCCTCTG  
GCGCTGGTGCCTACTCACAGTAAGAAAGCACTGATGCGCTACGAAGACGTTTACATGCCTGAGGTGTACAAAGCGAT  
TAACATTGCGCAAAACACCGCATGGAAAATCAACAAGAAAGTCTTAGCGGTGCGCAACGTAATCACCAAGTGGAAAGC  
ATTGTCCGGTCGAGGACATCCCTGCGATTGAGCGTGAAGAACTCCCGATGAAACCGGAAGACATCGACATGAATCCT  
GAGGCTCTCACCGCGTGGAAACGTGCTGCCGCTGCTGTGTACCAGCAAGGACAAGGCTCGCAAGTCTCGCCGATCAG  
CCTTGAGTTCATGCTTGAGCAAGCCAATAAGTTTGTCAACCATAAAGGCCATCTGGTTCCCTTACAACATGGACTGGC  
GCGGTGCTGTTTACGCTGTGTCAATGTTCAACCCGCAAGGTAACGATATGACCAAAGGACTGCTTACGCTGGCGAAA  
GGTAAACCAATCGGTAAAGGTTACTACTGGCTGAAAATCCACGGTGCAAAATGTGCGGGTGTGCGATAAGGTTCC  
GTTCCCTGAGCGCATCAAGTTCATTGAGGAAAACCACGAGAACATCATGGCTTGCCTAAGTCTCCACTGGAGAACA  
CTTGGTGGGCTGAGCAAGATTCTCCGTTCTGCTTCTTGCCTTCTGCTTTGAGTACGCTGGGGTACAGCACCACGGC  
CTGAGCTATAACTGCTCCCTTCCGCTGGCGTGTGACGGGTCTTGGCTCTGGCATCCAGCACTTCTCCGCGATGCTCCG  
AGATGAGGTAGGTGGTCGCGCGGTTAACTTGTCTTCTAGTGAAACCGTTCAGGACATCTACGGGATTGTTGCTAAGA  
AAGTCAACGAGATTCTACAAGCAGACGCAATCAATGGGACCGATAACGAAGTAGTTACCGTGACCGATGAGAACACT  
GGTCAAATCTCTGAGAAAGTCAAGCTGGGCACTAAGGCACTGGCTGGTCAATGGCTGGCTTACGGTGTACTCGCAG  
TGTGACTAAGCGTTCAGTCATGACGCTGGCTTACGGGTCCAAAGAGTTCGGCTTCCGTCACAAGTGTGGAAGATA  
CCATTACGCCAGCTATTGATTCCGGCAAGGGTCTGATGTTCACTCAGCCGAATCAGGCTGCTGGATAACATGGCTAAG  
CTGATTTGGGAATCTGTGAGCGTGACGGTGGTAGCTGCGGTTGAAGCAATGAACTGGCTTAACTGCTGCTAAGCT  
GCTGGCTGCTGAGGTCAAAGATAAGAAGACTGGAGAGATTCTTCGAAGCGTTGCGCTGTGCATTGGGTAACCTCTG  
ATGGTTTCCCTGTGTGGCAGGAATACAAGAAGCCTATTACAGACGCGCTTGAACCTGATGTTCCCTCGGTGAGTTCCGC  
TTACAGCCTACCATTAACACCAACAAAGATAGCGAGATTGATGCACACAAACAGGAGTCTGGTATCGCTCCTAACTT  
TGTACACAGCCAAGACGGTAGCCACCTTCGTAAGACTGTAGTGTGGGCACACGAGAAGTACGGAATCGAATCTTTTG  
CACTGATTCACGACTCCTTCCGGTACCATTCCGGCTGACGCTGCGAACCTGTTCAAAGCAGTGCAGGAACTATGGTT  
GACACATATGAGTCTTGTGATGTACTGGCTGATTTCTACGACCAGTTCGCTGACCAGTTGCACGAGTCTCAATTGGA  
CAAAATGCCAGCACTTCCGGCTAAAGGTAACCTGAACTCCGTGACATCTTAGAGTCGGACTTCCGCTTCCGCTAAC  
GCCAAATCAATACGACTCACTATAGAGGGCAAACTCAAGGTCATTTCGAAGAGTGGCCTTTATGATTGACCTTCTT  
CCGGTTAATACGACTCACTATAGGAGAACCTTAAAGGTTTAACTTTAAGACCCTTAAAGTGTAAATTAGAGATTTAAAT  
TAAAGAATTACTAAGAGAGGACTTTAAGT

>NRG-P0101

ATGCGTAACTTCGAAAAGATGACCAAACGTTCTAACCGTAATGCTCGTGACTTCGAGGCAACCAAAGGTGCGAAGTT  
GAATAAGACTAAGCGTGACCGCTCTCACAAGCGTAGCTGGGAGGGTCAGTAAGATGGGACGTTTATATAGTGGTAAT  
CTGGCAGCATTCAAGGCAGCAACAAACAAGCTGTTCCAGTTAGACTTAGCGGTCAATTTATGATGACTGGTATGATGC  
CTATAACAAGAAAAGATTGCATACGGTTACGTATTGAGGACAGGAGTGGAAACCTGATTGATACTAGCACCTTCTACC  
ACCACGACGAGGACGTTCTGTTCAATATGTGTACTGATTGGTTGAACCATATGTATGACCAGTTGAAGGACTGGAAG  
TAATACGACTCAGTATAGGGACAATGCTTAAAGGTCGCTCTCTAGGAGTGGCCTTAGTCATTTAACCAATAGGAGATA  
AACATTATGATGAACATTAAGACTAACCCGTTTAAAGCCGTGTCTTTCGTAGAGTCTGCCATTAAGAAGGCTCTGGA  
TAACGCTGGGTATCTTATCGCTGAAATCAAGTACGATGGTGTACGCGGGAACATCTGCGTAGACAATACTGCTAACA  
GTTACTGGCTCTCTCGTGTATCTAAAACGATTCCGGCACTGGAGCACTTAAACGGGTTTGGATGTTCCGCTGGAAGCGT  
CTACTGAACGATGACCGTTGCTTCTACAAAGATGGCTTTATGCTTGATGGGGAACCTCATGGTCAAGGGCGTAGACTT  
TAACACAGGGTCCGGCCTACTGCGTACCAAATGGACTGACACGAAGAACCAAGAGTCCATGAAGAGTTATTCGTTG  
AACCAATCCGTAAGAAAAGATAAAGTTCCTTTAAGCTGCACACTGGACACCTTACATAAAAATGTACGCTATCCTC  
CCGCTGCACATCGTGGAGTCTGGAGAAGACTGTGATGTATGACGTTGCTCATGCAGGAACACGTTAAGAACATGCT  
GCCTCTGCTACAGGAATACTTCCCTGAAATCGAATGGCAAGCGGCTGAATCTTACGAGTCTACGATATGGTAGAAC  
TACAGCAACTGTACGAGCAGAAGCGAGCAGAAGGCCATGAGGGTCTCATTGTGAAAGACCCGATGTGTATCTATAAG  
CGCGGTAAGAAATCTGGCTGGTGGAAAATGAAACCTGAGAACGAAGCTGACGGTATCATTAGGGTCTGGTATGGGG  
TACAAAAGGTCTGGCTAATGAAGGTAAAGTGATTGGTTTTGAGGTGCTTCTTGGAGTGGTGGTTTAGTTAACGCCA  
CGAATATCTCTCGCGCCTTAAATGGATGAGTTCACTGAGACAGTAAAAGAGGCCACCCTAAGTCAATGGGGATTCTTT  
AGCCCATACGGTATTGGCGACAACGATGCTTGTACTATTAACCCTTACGATGGCTGGGCGTGTCAAATTAGCTACAT  
GGAGGAAACACCTGATGGCTCTTTGCGGCACCCATCGTTTCTGTAATGTTCCGTTGGCACCGAGGACAACCCCTCAAGAGA  
AAATGTAATCACACTGGCTCACCTTCCGGTGGGCCTTTCTGCGTTTATAAGGAGACACTTTATGTTTAAAGAAGGTTG  
GTAAATTCCTTGGCGCTTTGGCAGCTATCCTGACGCTTGCCTATATTCTTGGCGTATACCCTCAAGTAGCACTAGTA  
GTAGTTGGCGCTTGTACTTAGCGGCAGTGTGTGCTTGCCTGTGGAGTATAGTTAACTGGTAATACGACTCACTAAA  
GGAGGTACACACCATGATGTACTTAAATGCCATTACTCATCGTCATTGTAGGATGCCTTGCCTCCACTGTAGCGATG  
ATGATATGCCAGATGGTCACGCTTAAATACGACTCACTAAAGGAGACACTATATGTTTCGACTTCATTACAACAAAAG

CGTTAAGAATTTACGGTTCGCCGTGCTGACCGTTCAATCGTATGTGCGAGCGAGCGCCGAGCTAAGATACCTCTTA  
TTGGTAACACAGTTCCTTTGGCACCGAGCGTCCACATCATTATCACCCGTGGTGACTTTGAGAAAGCAATAGACAAG  
AAACGTCCGGTTCCTTAGTGTGGCAGTGACCCGCTTCCCGTTCGTCCGTCTGTTACTCAAACGAATCAAGGAGGTGTT  
CTGATGGGACTGTTAGATGGTGAAGCCTGGGAAAAAGAAAACCCGCCAGTACAAGCAACTGGGTGTATAGCTTGCTT  
AGAGAAAGATGACCGTTATCCACACACCTGTAACAAAGGAGCTAACGATATGACCGAACGTGAACAAGAGATGATCA  
TTAAGTTGATAGACAATAATGAAGGTCGCCAGATGATTTGAATGGCTGCGGTATTCTCTGCTCCAATGTCCCTTGC  
CACCTCTGCCCGCAAATAACGATCAAAAGATAACCTTAGGTGAAATCCGAGCGATGGACCCACGTAAACCACATCT  
GAATAAACCTGAGGTAACCTCCTACAGATGACCAGCCTTCCGCTGAGACAATCGAAGGTGTCACTAAGCCTTCCCCT  
ACATGCTGTTTGACGACATTGAGGCTATCGAAGTGATTGCTCGTTCAATGACCGTTGAGCAGTTC AAGGGATACTGC  
TTCGGTAACATCTTAAAGTACAGACTACGTGCTGGTAAGAAGTCAGAGTTAGCGTACTTAGAGAAAGACCTAGCGAA  
AGCAGACTTCTATAAAGAACTCTTTGAGAAACATAAAGGATAAATGTTATGCATAACTTCAAGTCAACCCCACTGCC  
GACAGCCTATCTGATGACTTACATCTTGCTCAGAGTGGTCCCGAAAGATGTGGGAAGAGACATTCGACGATGCGTA  
CATCAAGCTGTATGAACTTTGGAAATCGAGAGGTCAATGACTATGTCAAACGTAAATACAGGTTCACTTAGTGTGGA  
CAATAAGAAGTTTTGGGCTACCGTAGAGTCCCGAGCATTCCCTTCGAGGTTCCAATCTACGCTGAGACCCTAGACG  
AAGCTCTGGAGTTAGCCGAATGGCAATACGTTCCGGCTGGCTTTGAGGTTACTCGTGTGCGTCTTGTGTAGCACCG  
AAGTAATACGACTCACTATTAGGGAAGACTCCCTCTGAGAAACCAAACGAAACCTAAAGGAGATTAACATTATGGCT  
AAGAAGATTTTACCTCTGCGCTGGGTACCGCTGAACCTTACGCTTACATCGCCAAGCCGGACTACGGCAACGAAGA  
GCGTGGCTTTGGGAACCTCGTGGTGTCTATAAAGTTGACCTGACTATTCCCAACAAAGACCCGCGCTGCCAGCGTA  
TGGTCGATGAAATCGTGAAGTGTACGAAGAGGCTTATGCTGCTGCCGTTGAGGAATACGAAGCTAATCCACCTGCT  
GTAGCTCGTGGTAAGAAACCGCTGAAACCGTATGAGGGTGACATGCCGTTCTTCGATAACGGTGACGGTACGACTAC  
CTTTAAGTTCAAATGCTACGCGTCTTTCCAAGACAAGAAGACCAAAGAGACCAAGCACATCAATCTGGTTGTGGTTG  
ACTCAAAGGTAAGAAGATGGAAGACGTTCCGATTATCGGTGGTGGCTCTAAGCTGAAAGTTAAATATTCTCTGGTT  
CCATACAAGTGAACACTGCTGTAGGTGCGAGCGTTAAGCTGCAACTGGAATCCGATGCTGGTTCGAACCTGGCTAC  
CTTTGGTGGCGGTGAAGACGATTGGGCTGACGAAGTTGAAGAGAACGGCTATGTTGCCTCTGGTTCTGCCAAAGCGA  
GCAAACCACGCGACGAAGAAAGCTGGGACGAAGACGACGAAGAGTCCGAGGAAGCAGACGAAGACGGGACTTCTAA  
GTGGAACCTGCGGGAGAAAATCCTTGAGCGAATCAAGGTGACTTCCCTCTGGGTGTTGGGAGTGGCAGGGCGCTACGAA  
CAATAAAGGTTACGGGCAGGTGTGGTGCAGCAATACCGGAAAGGTTGTCTACTGTATCGCGTAATGTCTAATGCTC  
CGAAAGGTTCTACCGTCTGCCTCCTGTGATAATCCATTATGTTGTAACCCTGAACACCTATCCATAGGAACTCCA  
AAAGAACTCCACTGACATGGTAAATAAGGGTCCGTCACACAAGGGGTATAAACTTTCCAGCAAGACGTAATGGC  
AATCATGGAGTCCAGCGAGTCCAATGTATCCTTAGCTCGCACCTATGGTGTCTCCCAACAGACTATTTGTGATATAC  
GCAAAGGGAGGCGACATGGCAGGTTACGGCGCTAAAGGAATCCGAAAGGTTGGAGCGTTTTCGCTCTGGCCTAGAGGA  
CAAGGTTTTCAAAGCAGTTGGAATCAAAGGTTAAATTCGAGTATGAAGAGTGGAAAGTGCCTTATGTAATTCGGG  
CGAGCAATCACACTTACACTCCAGACTTCTTACTTCCAAACGGTATATTTCGTTGAGACAAAGGGTCTGTGGGAAAGC  
GATGATAGAAAGAAGCACTTATTAATTAGGGAGCAGCACCCCGAGCTAGACATCCGTATTGTCTTCTCAAGCTCACG  
TACTAAGTTATACAAAGGTTCTCCAACGTCTTATGGAGAGTCTGCGAAAAGCATGGTATTAAGTTCGCTGATAAAC  
TGATACCTGCTGAGTGGATAAAGGAACCCAAGAAGGAGGTCCCTTTGATAGATTA AAAAGGAAAGGAGGAAAGAAA  
TAATGGCTCGTGTACAGTTTTAAACAACGTGAATCTACTGACGCAATCTTTGTTCACTGCTCGGCTACCAAGCCAAGT  
CAGAATGTTGGTGTCCGTGAGATTCGCCAGTGGCACAAAGAGCAGGGTTGGCTCGATGTGGGATAACCACTTTATCAT  
CAAGCGAGACGGTACTGTGGAGGCAGGACGAGATGAGATGGCTGTAGGCTCTCACGCTAAGGGTTACAACCACAACT  
CTATCGGCGTCTGCCTTGTGGTGGTATCGACGATAAAGGTAAGTTCGACGCTAACTTTACGCCAGCCAAATGCAA  
TCCCTTCGCTCACTGCTTGTACACTGCTGGCTAAGTACGAAGGCGCTGTGCTTCGCGCCCATCATGAGGTGGCGCC  
GAAGGCTTGCCCTTCGTTTCGACCTTAAGCGTTGGTGGGAGAAGAACGAACCTGGTCACTTCTGACCGTGGATAATTA  
TTGAACTCACTAAAGGGAGACCACAGCGTTTTCCCTTTGTTTCGCATTGGAGGTCAAATAATGCGCAAGTCTTATAAA  
CAATTCTATAAGGCTCCGAGGAGGCATATCCAAGTGTGGGAGGCAGCCAATGGGCCTATACCAAAGGTTATTATAT  
AGACCACATTGACGGCAATCCACTCAACGACGCCTTAGACAATCTCCGTCTGGCTCTCCAAAAGAAAACCTCATGGA  
ACATGAAGACTCCAAAGAGCAATACCTCAGGACTAAAGGGACTGAGTTGGAGCAAGGAAAGGGAGATGTGGAGAGGC  
ACTGTAACAGCTGAGGGTAAACAGCATAACTTTTCGTAGTAGAGATCTATTGGAAGTCGTTGCGTGGATTTATAGAAC  
TAGGAGGGAATTGCATGGACAATTCGCACGATTCCGATAGTGTATTTCTTTACCACATTCCTTGTGACAACCTGTGGG  
AGTAGTGATGGGAACTCGCTGTTCTCTGACGGACACACGTTCTGCTACGTATGCGAGAAGTGGACTGCTGGTAATGA  
AGACACTAAAGAGAGGGCTTCAAACGGAACCCCTCAGGAGGTAAACCAATGACTTACAACGTGTGGAACCTTCGGGG  
AATCCAATGGACGCTACTCCGCGTTAACTGCGAGAGGAATCTCCAAGGAAACCTGTGAGAAGGCTGGCTACTGGATT  
GCCAAAGTAGACGGTGTGATGTACCAAGTGGCTGACTATCGGGACCAGAACGGCAACATTGTGAGTCAGAAGGTTTCG  
AGATAAAGATAAGAACTTTAAGACCACTGGTAGTCACAAGAGTGACGCTCTGTTCCGGAAAGCACTTGTGGAATGGTG  
GTAAGAAGATTGTCGTTACAGAAGGTGAAATCGACATGCTTACCGTGATGGAACCTCAAGACTGTAAGTATCCTGTA  
GTGTCGTTGGGTCACGGTGCCTCTGCCGCTAAGAAGACATGCGCTGCCAACTACGAATACTTTGACCAGTTTCAACA  
GATTATCTTAATGTTTCGATATGGACGAAGCAGGGCGCAAAGCAGTCAAGAGGCTGCACAGGTTCTACCTGCTGGTA  
AGGTACGAGTGGCAGTTCCTCCGTGTAAGGATGCAAACGAGTGTACCTAAATGGTACGACCGTGAATCATGGAG

CAAGTGTGGAATGCTGGTCTTGGATTCTGATGGTGTGGTATCGGCTCTTTTCGTTACGTGAACGAATCCGTGAGCA  
CCTATCGTCCGAGGAATCAGTAGGTTTACTTTTTAGTGGCTGCACTGGTATCAACGATAAGACCTTAGGTGCCCGTG  
GTGGTGAAGTCATTATGGTCACTTCCGGTTCGGGTATGGGTAAGTCAACGTTTCGTCGGTCAACAAGCTCTACAATGG  
GGCACAGCGATGGGCAAGAAGGTAGGCTTAGCGATGCTTGAGGAGTCCGTTGAGGAGACCGCTGAGGACCTTATAGG  
TCTACACAACCGTGTCCGACTGAGACAATCCGACTCACTAAAGAGAGAGATTATTGAGAACGGTAAGTTCGACCAAT  
GGTTCGATGAACTGTTTCGGCAACGATACGTTCCATCTATATGACTCATTTCGCCGAGGCTGAGACGGATAGACTGCTC  
GCTAAGCTGGCCTACATGCGCTCAGGCTTGGGCTGTGACGTAATCATTCTAGACCACATCTCAATCGTCGTATCCGC  
TTCTGGTGAATCCGATGAGCGTAAGATGATTGACAACCTGATGACCAAGCTCAAAGGGTTCGCTAAGTCAACTGGGG  
TGGTGTGGTTCGTAATTTGTACCTTAAGAACCCAGACAAAGGTAAAGCACATGAGGAAGGTCGCCCCGTTTCTATT  
ACTGACCTACGTGGTTCTGGCGCACTACGCCAATCTGATACTATTATTGCCCTTGAGCGTAATCAGCAAGCGA  
TATGCCATAACCTTGTCTCGTTCGTTTCTCAAGTCCGCTTTACTGGTGATACTGGTATCGTGGTACATGGAAT  
ACAACAAGGAAACCGGATGGCTTGAACCATCAAGTTACTCAGGGGAAGAAGAGTCACTACTCAGAGTCAACAGACTGG  
TCCAACGACACTGACTTCTGACAGGATTCTTGATGACTTTCCAGACGACTACGAGAAGTTTCGCTGGAGAGTCCCAT  
TCTAATACGACTCACTAAAGGAGACACACCATGTTCAAACCTGATTAAGAAGTTAGGCCAACTGCTGGTTCGTATGTA  
CAACGTGGAAGCCAAGCGACTGAACGATGAGGCTCGTAAAGAGGGCCACACAGTACGCGCTCTGGCGATTTCGCTCCA  
ACGAACTGGCTGACAGTGCATCCACTAAAGTTACCGAGGCTGCCCGTGTGGCAAACCAAGCTCAACAGCTTTCCAAA  
TTCTTTGAGTAATCAAACAGGAGAAACCATTATGTCTAACGTAGCTGAAACTATCCGTCTATCCGATACAGCTGACC  
AGTGGAAACCGTCGAGTCCACATCAACGTTTCGCAACGGTAAGGCGACTATGGTTTACCGCTGGAAGGACTCTAAGTCC  
TCTAAGAATCACACTCAGCGTATGACGTTGACAGATGAGCAAGCACTGCGTCTGGTCAATGCGCTTACCAAAGCTGC  
CGTGACAGCAATTCATGAAGCTGGTTCGCGTCAATGAAGCTATGGCTATCCTCGACAAGATTGATAACTAAGAGTGGT  
ATCCTCAAGGTCGCCAAAGTGGTGGCCTTCATGAATACTATTTCGACTCACTATAGGAGATATTACCATGCGTGACCC  
TAAAGTTATCCAAGCAGAAATCGCTAAACTGGAAGCTGAACTGGAGGACGTTAAGTACCATGAAGCTAAGACTCGCT  
CCGCTGTTACATCTTGAAGAACTTAGGCTGGACTTGGACAAGACAGACTGGCTGGAAGAAACAGAAAGTTACCAAG  
CTGAGTCATAAGGTGTTTCGATAAGGACACTATGACCCACATCAAGGCTGGTGATTGGGGTAAAGGTTGACATGGGAGT  
TGTTGGTGGATACGGCTACGTCCGCTCAGTTAGTGGCAAATATGCACAAGTGTACATACATCACAGGTGTTACTCCAC  
GCGGTGCAATCGTTGCCGATAAGACCAACATGATTACACACAGGTTTCTTGACAGTTGTTTCATATGAAGAGATTGTT  
AAGTCACGATAATCAATAGGAGAAATCAATATGATCGTTTCTGACACTCGAAGCTAACGCCCTCTTAGAGAGCGTCAC  
TAAGTTCACACTGCGGGGTTATCTACGACTACTCCACCGCTGAGTACGTAAGCTACCGTCCGAGTACTTCGGTGCCT  
ATCTGGATGCGCTGGAAGCCGAGGTTGCACGAGGCGGCTTTATTGTGTTCCACAACGGTACAAGTATGACGTTCCCT  
GCATTGACCAAACCTGGCAAAGTTGCAATTGAACCGAGAGTTCACCTTCCCTCGTGAGAAGTATTGACACCCCTTGT  
GTTGTACGTTTTGATTCAATCCAACCTCAAGGACACCGATATGGGTCTTCTGCGTTCGGCAAGTTGCCCGGAAAC  
GCTTTGGGTCTCACGCTTTGGAGGCGTGGGGTTATCGCTTAGGCGAGATGAAGGGTGAATACAAAGACGACTTTAAG  
CGTATGCTTGAAGAGCAGGGTGAAGAATACGTTGACGGAATGGAGTGGTGGAACTTCAACGAAGAGATGATGGACTA  
TAACGTTACAGGACGTTGTGGTAACATAAGCTCTCCTTGAGAAGCTACTCTCTGACAAACATTACTTCCCTCCTGAGA  
TTGACTTTACGGACGTAGGATACACTACGTTCTGGTCAAGATCCCTTGAGGCCGTTGACATTGAACATCGTGCTGCA  
TGGCTGCTCGCTAAACAAGAGCGCAACGGGTTCCCGTTTGACACAAAAGCAATCGAAGAGTTGTACGTAGAGTTAGC  
TGCTCGCCGCTCTGAGTTGCTCCGTAAATTGACCGAAACGTTCCGGCTCGTGGTATCAGCCTAAAGGTGGCACTGAGA  
TGTTCTGCCATCCGCGAACAGGTAAGCCACTACCTAAATACCCTCGCATTAAAGACACCTAAAGTTGGTGGTATCTTT  
AAGAAGCCTAAGAACAAGGCACAGCGAGAAGGCCGTTGAGCCTTGCGAAGCTTGAATACCCGCGAGTACGTTGCTGGTGC  
TCCTTACACCCAGTTGAACATGTTGTGTTAACCCTTCGTTCTCGTGACCACATTGAGAAGAACTCCAAGAGGCTG  
GGTGGGTCCCAGCAAGTACACCGATAAGGGTGTCTCTGTGGTGGACGATGAGGTACTCGAAGGAGTACGTGTAGAT  
GACCCTGAGAAGCAAGCCGCTATCGACCTCATTAAAGAGTACTTGATGATTGAGAAGCGAATCGGACAGTCTGCTGA  
GGGAGACAAAGCATGGCTTCGTTATGTTGCTGAGGATGGTAAGATTGATGGTTCTGTTAACCTAATGGAGCAGTTA  
CGGGTTCGTGCGACCCATGCGTTCCCAAACCTTGCGCAAATCCGGGTGTACGTTCTCCTTATGGAGAGCAGTGTGCG  
GCTGCTTTTGGCGCTGAGCACCATTTGGATGGGATAACTGGTAAGCCTTGGGTTTCAGGCTGGCATCGACGCATCCGG  
TCTTGAGCTACGCTGCTTGGCTCACTTCATGGCTCGCTTTGATAACGGCGAGTACGCTCACGAGATTCTTAACGGCG  
ACATCCACACTAAGAACCAGATAGCTGCTGAACCTACCTACCCGAGATAACGCTAAGACGTTTCACTATGGGTTCCCTC  
TATGGTGTGGTATGAGAAGATTGGACAGATTGTTGGTGTGGTAAAGAGCGCGGTAAGGAACTCAAGAAGAAAT  
CCTTGAGAACACCCCGCGATTGCAGCACTCCGCGAGTCTATCCAACAGACACTTGTGAGTCTCTCAATGGGTAG  
CTGGTGAGCAACAAGTCAAGTGGAAACGCCGCTGGATTAAAGGTCTGGATGGTTCGTAAGGTACACGTTTCGTAGTCTC  
CACGCTGCCTTGAATACCCTACTGCAATCTGCTGGTGTCTCATCTGCAAACCTGTGGATTATCAAGACCGAAGAGAT  
GCTCGTAGAGAAAGGCTTGAAGCATGGCTGGGATGGGGACTTTGCGTACATGGCATGGGTACATGATGAAATCCAAG  
TAGGCTGCCGTACCGAAGAGATTGCTCAGGTGGTCAATTGAGACCGCACAAAGAAGCGATGCGCTGGGTTGGAGACCAC  
TGGAACCTCCGGTGTCTTCTGGATAACCGAAGGTAAGATGGGTCTAATTGGGCGATTTGCCACTGATACAGGAGGCT  
ACTCATGAACGAAAGACACTTAACAGGTGCTGCTTCTGAAATGCTAGTAGCCTACAAATTTACCAAAGCTGGGTACA  
CTGTCTATTACCCTATGCTGACTCAGAGTAAAGAGGACTTGGTTGTATGTAAGGATGGTAAATTTAGTAAGGTTTCAG  
GTTAAACAGCCACAACGGTTCAAACCAACACAGGAGATGCCAAGCAGGTTAGGCTAGGTGGATGCGGTAGGTCCGA

ATATAAGGATGGAGACTTTGACATTCTTGCGGTTGTGGTTGACGAAGATGTGCTTATTTTTACATGGGACGAAGTAA  
AAGGTAAGACATCCATGTGTGTGTCGGCAAGAGAAACAAAGGCATAAAACTATAGGAGAAATTATTATGGCTATGACAA  
AGAAATTTAAAGTGTCTTTCGACGTTACCGCAAAGATGTGCTGTCGACGTTACGGCAATCTTAGAGAAAGATATGCTG  
CATCTATGTAAGCAGGTTCGGCTCAGGTGCGATTGTCCCAATGGTAAACAGAAGGAAATGATTGTCCAGTTCCCTGAC  
ACACGGTATGGAAGGATTGATGACATTTCGTAGTACGTACATCATTTCGTGAGGCCATTAAGGACATGCACGAAGAGT  
ATGCAGATAAGGACTCTTTCAAACAATCTCCTGCAACAGTACGGGAGGTGTTCTGATGTCTGACTACCTGAAAGTGC  
TGCAAGCAATCAAAAGTTGCCCTAAGACTTTCCAGTCCAATATGTACGGAACAATGCGAGCCTCGTAGCGGAGGCC  
GCTTCCCGTGGTCACATCTCGTGCCTGACTACTAGTGGACGTAACGGTGGCGCTTGGGAAATCACTGCTTCCGGTAC  
TCGCTTTCTGAAACGAATGGGAGGATGTGTCTAATGTCTCGTGACCTTGTGACTATTCCACGCGATGTGTGGAACGA  
TATACAGGGCTACATCGACTCTCTGGAACGTGAGAACGATAGCCTTAAGAATCAACTAATGGAAGTCAGCAATAACG  
TAGCGGAATAGAGGAGAACTTAATGGCACTTCTTGACCTTAAACAATCTATGAGTTACGTGAAGGCTGCGACGA  
CAAGGGTATCCTTGTGATGGACGGCGACTGGCTGGTCTTCCAAGCTATGAGTGTGCTGAGTTTGTATGCCTCTTGGG  
AGGAAGAGATTTGGCACCGATGCTGTGACCACGCTAAGGCCCGTCAGATTCTTGAGGATTCCATTAAGTCCACGAG  
ACCCGTAAGAAGGCTTGGGCAGGTGCTCCAATTGTCTTTCGCTTACCAGATAGTGTAACTGGCGTAAAGAAGTGGT  
TGACCCGAACTATAAGGCTAACCCTAAGGCCGTGAAGAAACCTGTAGGGTACTTTGAGTTCCTTGATGCTCTCTTTG  
AGCGCGAAGAGTTCTATTGCATCCGTGAGCCTATGCTTGAGGGTGTATGACGTTATGGGAGTTATTGCTTCCAATCCG  
TCTGCCTTCGGTGTCTGTAAGGCTGTAATCATCTCTTTCGATAAAGACTTTAAGACCATCCCTAACTGTGACTTCTT  
GTGGTGTACCACTGGTAACATCCTGACTCAGACCGAAGAGTCCGCTGACTGGTGGCACCTCTTCCAGACCATCAAGG  
GTGACATCACTGATGGTTACTCAGGGATTGCTGGATGGGGTGATACCGCCGAGGACTTCTTGAATAACCCGTTTATA  
ACCGAGCCTAAAACGTCTGTGCTTAAGTCCGGTAAGAACAAGGCCAAGAGGTTACTAAATGGGTAAACGCGACCC  
TGAGCCTCATGAGACGCTTTGGGACTGCATTAAGTCCATTGGCGCGAAGGCTGGTATGACCGAAGAGGATATTATCA  
AGCAGGGCCAAATGGCTCGAATCCTACGGTTCAACGAGTACAACCTTTATTGACAAGGAGATTTACCTGTGGAGACCG  
TAGCGTATATTGGTCTGGGTCTTTGTGTTCTCGGAGTGTGCCTCATTTCGTGGGGCCTTTGGGACTTAGCCAGAATA  
ATCAAGTCTTACACGACACTAAGTGATAAACTCAAGGTCCCTAAATTAATACGACTCACTATAGGGGAGATAGGGGC  
CTTTACGATTATTACTTTAAGATTTAACTCTAAGAGGAATCTTTATTATGTAAACACCTATTAACCAATTACTTAAG  
AACCTAACGATATTCCAGATGTACCTCGTGCAACCGCTGAGTATCTACAGGTTTCGATTCAACTATGCGTACCTCGA  
AGCGTCTGGTCAATAGGACTTATGCGTGTAAATGGTGTAGTGGAGGCCACATCTTGGGTTTTCATTACGGGCCTAC  
AGTATGCCTCTAACGTCATTGACGAGATTGAGTTACGCAAGGAACAATAAGAGATGATGGGAGGATGACACTAT  
GTGTTTTCTCACCGAAAATTAATACTCCGAAGATGGATAACCAATCAGATTTCGAGCCGTTGAGCCAGCCCTCTGACC  
AAGAAGTCTCAAGCGTGGAGTTCCGGTGGTCTTCTGATGAGACGGATACCGAGGGCACCAGAGTGTCTGGACGCAAA  
GGCCTCAAGGTGCAACGTGATGATTCCGTAGCGAAGTCTAAAGCCAGCGGCAATGGCTCCGCTCGTATGAAATCTTC  
CATCCGTAAGTCCGCATTTGGAGGTAAGAAGTGTGCTGAGTTCACATGTGTGGAGGCTAAGAGTTCGCTTCCGTGC  
AATCCGGTGGACTGTGGAACACCTTGGGTTGCCTAAAGGATTTCGAAGGACACTTTGTGGGCTACAGCCTCTACGTAG  
ACGAAGTGTGACATGTCTGGTTGCCGTGAAGAGTACATTCTGGACTCTACCGGAAAACATGTAGCGTACTTTCGCG  
TGGTGCCTAAGCTGTGACATTACCCACAAAGGAGACATTCTGGATGTAACGTCCGTTGTCTAATTAATCCTGAGGCAGA  
CTCTAAGGGCTTACAGCGATTCCCTAGCGAAACGCTTTAAGTACCTTTCGCGAATCCACGATTGCGATTGGGTGTCTC  
GTTGTAAGCATGAAGGCGAGACAATGCGTGTATACTTTAAGGAGGTATAAGTTATGGGTAAGAAAGTTAAGAAGGCC  
GTGAAGAAAGTCAACAAGTCCGTTAAGAAAGTCTGTTAAGGAAGGGGCTCGTCCGGTTAAACAGGTTGCTGGCGGTCT  
AGCTGGTCTGGCTGGTGGTACTGGTGAAGCACAGATGGTGAAGTACCACAAGCTGCCGCACAGATTGTTGACGTAC  
CTGAGAAAGAGGTTTCCACTGAGGACGAAGCACAGACAGAAAGCGGACGCAAGAAAGCTCGTGTGGCGGTAAGAAA  
TCCTTGAGTGTAGCCCGTAGCTCCGGTGGCGGTATCAACATTTAATCAGGAGGTTATCGTGGAAAGACTGCATTGAAT  
GGACCGGAGGTGTCAACTCTAAGGGTTATGGTTCGTAAGTGGGTTAATGGTAAACTTGTGACTCCACATAGGCACATC  
TATGAGGAGACATATGGTCCAGTTCCAAACAGGAATTGTGGTGTATGCATATCTGCGATAACCCTAGGTGCTATAACAT  
AAAGCACCTTACGCTTGGAACTCCAAAGGATAATTCCGAGGACATGGTTACCAAAGGTAGACAGGCTAAAGGAGAGG  
AACTAAGCAAGAACTTACAGAGTCAGACGTTCTCGCTATACGCTCTTCAACCTTAAGCCACCGCTCCTTAGGAGAA  
CTGTATGGAGTCAGTCAATCAACCATAACCGCAATACTACAGCGTAAGACATGGAGACACATTTAATGGCTGAGAAA  
CGAACAGGACTTGGCGAGGATGGCGCAAAGTCTGTCTATGAGCGTTTAAAGAACGACCGTGTCTCCCTATGAGACACG  
CGCTCAGAATTGCGCTCAATATAACCATCCCATCATTGTTCCCTAAGGACTCCGATAACGCCTCTACAGATTATCAAA  
CTCCGTGGCAAGCCGTGGGCGCTCGTGGTCTGAACAATCTAGCCTCTAAGCTCATGCTGGCTCTATTCCCTATGCAG  
ACTTGGATGCGACTTACTATATCTGAATATGAAGCAAAGCAGTTACTGAGCGACCCCGATGGACTCGCTAAGGTGCA  
TGAGGGCCTCTCGATGGTAGAGCGTATCATCATGAACTACATTGAGTCTAACAGTTACCGCGTACTCTCTTTGAGG  
CTCTCAAACAGTTAGTCGTAGCTGGTAACGTCCTGCTGTACCTACCGGAACCGGAAGGGTCAAACCTATAATCCCATG  
AAGCTGTACCGATTGTCTTCTTATGTGGTCCAACGAGACGCATTTCGGCAACGTTCTGCAAATGGTACTCGTGACCA  
GATAGCTTTTGGTGTCTCTCCCTGAGGACATCCGTAAGGCTGTAGAAGGTCAAGGTGGTGAAGAAAGCTGATGAGA  
CAATCGACGTGTACACTCACATCTATCTGGATGAGGACTCAGGTGAATACCTCCGATACGAAGAGGTGAGGGTATG  
GAAGTCCAAGGCTCCGATGGGACTTATCCTAAAGAGGCTTGGCCATACATCCCGATTCCGATGGTCAAGACTAGATGG  
TGAATCCTACGGTCTTTCGTACATTGAGGAATACTTAGGTGACTTACGGTCCCTTGAAATCTCCAAGAGGCTATCG

TCAAGATGTCCATGATTAGCTCTAAGGTTATCGGCTTAGTGAATCCTGCTGGTATCACCCAGCCACGCCGACTGACC  
AAAGCTCAGACTGGTGACTTCGTTACTGGTCGTCCAGAAGACATCTCGTTCCTCCAAGTGGAGAAGCAAGCAGACTT  
TACTGTAGCTAAAGCCGTAAGTGACGCTATCGAGGCTCGCCTTTTCGTTTGCCTTTATGTTGAACTCTGCGGTTTCAGC  
GTACAGGTGAACGTGTGACCCGCCGAAGAGATTCCGGTATGTAGCTTCTGAACTTGAAGATACTTTAGGTGGTGTCTAC  
TCTATCCTTTCTCAAGAATTACAATTGCCTCTGGTACGAGTGTCTTGAAGCAACTACAAGCCACGCAACAGATTCC  
TGAGTTACCTAAGGAAGCCGTAGAGCCAACCATTAGTACAGGTCTGGAAGCAATTGGTTCGAGGACAAGACCTTGATA  
AGCTGGAGCGGTGTGTCACTGCGTGGGCTGCACTGGCACCTATGCGGGACGACCCTGATATTAACCTTGCGATGATT  
AAGTTACGTATTGCCAACGCTATCGGTATTGACACTTCTGGTATTCTACTCACCGAAGAACAGAAGCAACAGAAGAT  
GGCCCAACAGTCTATGCAAAATGGGTATGGATAATGGTGTCTGCTGCGCTGGCTCAAGGTATGGCTGCACAAGCTACAG  
CTTCACCTGAGGCTATGGCTGCTGCCGCTGATTCCGTAGGTTTACAGCCGGGAATTTAATAACGACTCACTATAGGGA  
GACCTCATCTTTGAAATGAGCGATGACAAGAGGTTGGAGTCTCGCTTCTTCTGTAGTTCAACTTTAAGGAGACAAT  
AATAATGGCTGAATCTAATGCAGACGTATATGCATCTTTTGGCGTGAAGTCCGCTGTGATGTCTGGTGGTTCCGTTG  
AGGAACATGAGCAGAACATGCTGGCTCTTGATGTTGCTGCCCGTGTGCGGATGATGCAATCGAGTTAGCGTCAGAC  
GAAGTGGAAACAGAACGTGACCTGTATGACAACCTCTGACCCGTTCCGGTCAAGAGGATGACGAAGGCCGATTCCAGGT  
TCGTATCGGTGATGGCTCTGAGCCGACCGATGTGGACACTGGAGAAGAAGGCGTTGAGGGCACCGAAGGTTCCGAAG  
AGTTTACCCCACTGGGCGAGACTCCAGAAGAAGTGGTAGCTGCCTCTGAGCAACTTGGTGAGCACGAAGAGGGCTTC  
CAAGAGATGATTAACATTGCTGCTGAGCGTGGCATGAGTGTGAGACCATGAGGCTATCCAGCGTGAGTACGAGGA  
GAACGAAGAGTTGTCCGCCGAGTCTACGCTAAGCTGGCTGAAATTTGGCTACACGAAGGCTTTTATTGACTCGTATA  
TCCGTGGTCAAGAAGCTCTGGTGGAGCAGTACGTAACAGTGTCTATTGAGTACGCTGGTGGTCTGTAACGTTTTGAT  
GCACTGTATAACCACCTTGAGACGCACAACCTGAGGCTGCACAGTCTGATAATGCGTTGACCAATCGTGACTT  
AGCGACCGTTAAGGCTATCATCAACTTGGCTGGTGGTGTCTCGCGCTAAGGCGTTCCGGTTCGTAAGCCAACCTCGTAGTG  
TGACTAATCGTGCTATTCCGGCTAAACCTCAGGCTACCAAGCGTGAAGGCTTTGCGGACCGTAGCGAGATGATTA  
GCTATGAGTGACCCTCGGTATCGCACAGATGCCAACTATCGTCTGCAAGTTCGAACAGAAAGTAATCGATTTCGA  
CTGATAGACTTCGAAATTAATACGACTCACTATAGGGAGACCACAACCGTTTTCCCCCTAGAAATAATTTTTGTTTAA  
TTAAGAAGGAGATATACATATGGCTAGCATGACTGGTGGACAGCAAATGGGTACTAACCAAGGTAAAGGTGTAGTT  
GCTGCTGGAGATAAACTGGCGTTGTTCTTGAAGGTATTTGGCGGTGAAGTCTGACTGCGTTCGCTCGTACCTCCGT  
GACCACTTCTCGCCACATGGTACGTTCCATCTCCAGCGGTAATCCGCTCAGTTCCTGTTCTGGGTTCGCACTCAGG  
CAGCGTATCTGGCTCCGGGCGAGAACCTCGACGATAAACGTAAGGACATCAAACACACCCGAGAAGGTAATCACCATT  
GACGGTCTCTGACGGCTGACGTTCTGATTTATGATATTGAGGACGCGATGAACCACTACGACGTTTCGCTGTAGTA  
TACCTCTCAGTTGGGTGAATCTCTGGCGATGGCTGCGGATGGTGCGGTTCTGGCTGAGATTGCCGGTCTGTGTAACG  
TGGAAAGCAAATATAATGAGAACATCGAGGGCTTAGGTAAGTACTGCTACCCTAATTGAGACCACTCAGAACAAGGCCGCA  
CTTACCACCAAGTTGCGCTGGGTAAGGAGATTATTGCGGCTCTGACTAAGGCTCGTGCGGCTCTGACCAAGAACTA  
TGTTCCGGCTGCTGACCGTGTGTTCTACTGTGACCCAGATAGCTACTCTGCGATTCTGGCAGCACTGATGCCGAACG  
CAGCAAACACTACGCTGCTCTGATTGACCCTGAGAAGGGTTCTATCCGCAACGTTATGGGCTTTGAGGTTGTAGAAGTT  
CCGCACCTCACCGCTGGTGGTGTGGTACCCTCGTGAGGGCACTACTGGTTCAGAAGCACGCTCTTCCCTGCCAATAA  
AGGTGAGGGTAATGTCAAGGTTGCTAAGGACAACGTTATCGGCTGTTTATGCACCGCTCTGCGGTAGGTAAGTTA  
AGCTGCGTGACTTGGCTCTGGAGCGCGCTCGCCGTGCTAAGTCCAAGCGGACCAGATTATCGCTAAGTACGCAATG  
GGCCACGGTGGTCTTCGCCCAGAAGCTGCAGGAGCTGTCTGATTCCAGTCAAGTGTGATGCTCGGGGATCCGAATTC  
GAGCTCCGTCTAATACGACTCACTATAGCTAAACATTAATCATTTAAAATAAGGAGGTAAAGCATGAAATATCTTCT  
GCCTACGGCTGCCACGGGTTTGTACTGCTTGCAGCTCAGCCAGCGGTCGCCATGGTATTCACACTGGAGGATTTTG  
TCGGTGACTGGCGCCAGACTGCTGGATATAATCTTGATCAAGTGTGGAGCAAGGAGGCGTCTCAAGCCTTTTCCAG  
AATTTAGGTGTTAGCGTCACACCGATTCAACGTATCGTGTGAGTGGGGAAGCGGCTTAAAAATCGACATCCACGT  
CATCATTCCATATGAAGGGTTGTCAGGGGATCAGATGGGTGAGATTGAAAAGATTTTAAAGGTTGTCTACCCAGTAG  
ACGACCATCACTTCAAGGTTATTTTACACTACGGTACATTAGTAATTGACGGCGTGACTCCTAACATGATTGACTAT  
TTTGGACGCCCCGATGAGGGGATTGCAGTGTTCGACGGCAAGAAGATCACAGTTACGGGGACTCTGTGGAATGGGAA  
TAAAATATCGACGAGCGTCTGATTAACCCCGATGGCTCTCTGTTGTTCCGTGTCACTATTAACGGTGTACGGGCT  
GGCGCTTTTGTGAACGCATTTTAGCAGGCTCGAGCGGCCCTACGTCAGGTCCGGCCGGTTGCCAAGTTTTATGGGGG  
GTCAACCAGTGAACACAGGCTTTACGGCGAACGTTACTGTCAAGAACACAAGCTCCGCTCCTGTGGATGGTTGGAC  
ACTGACCTTTTCTTTCCCTCAGGTGAGCAAGTACACAGGCGTGGAGTTCTACGGTTACACAATCTGGTTCTGCTG  
TTACTGTCCGTAACGCGCCCTGGAATGGAAGCATCCAGCGGGCGGGACCGCACAGTTTGGCTTCAATGGCTCTCAT  
ACAGGGACAAACGCAGCACCAACAGCATTTTCTTGAATGGAACCCCTTGCACTGTGCGATAAGCTTGCGGCCGCAC  
TCGAGTAAGTATGAACTTGGGGCTCTAAACGGGTCTTGGGGGTTTTTGGCTGAAAGGAGGAAGTATATGCG  
CTCATAAGATATGAACGTTGAGACTGCCGCTGAGTTATCAGCTGTGAACGACATTCTGGCGTCTATCGGTGAACCTC  
CGGTATCAACGCTGGAAGGTGACGCTAACGCAGATGCAGCGAACGCTCGGCGTATTCTCAACAAGATTAACCGACAG  
ATTCAATCTCGTGGATGGACGTTCAACATTGAGGAAGGCATAACGCTACTACCTGATGTTTACTCCAACCTGATTGT  
ATACAGTGACGACTATTTATCCCTAATGTCTACTTCCGGTCAATCCATCTACGTTAACCGAGGTGGCTATGTGTATG  
ACCGAACGAGTCAATCAGACCGCTTTGACTCTGGTATTACTGTGAACATTATTTCGCTCTCCGCGACTACGATGAGATG

CTGAGTGTCTCCGTTACTGGATTGTACCAAGGCTTCCCCTCAGTTCAACAACCGATTCTTTGGGGCACCAGGAAAGT  
AGAGGGTGTACTCCAAGAAGAGGAAGATGAGGCTAGACGTCTCTGCATGGAGTATGAGATGGACTACGGTGGGTACA  
ATATGCTGGATGGAGATGCGTTCACTTCTGGTCTACTGACTCGCTAACATTAATAAATAAGGAGGCTCTAATGGCAC  
TCATTAGCCAATCAATCAAGAACTTGAAGGGTGGTATCAGCCAACAGCCTGACATCCTTTCGTTATCCAGACCAAGGG  
TCACGCCAAGTTAACGGTTGGTCTTCCGGAGACCGAGGGCCTCCAAAAGCGTCCACCTCTTGTTTTCTTAAATACACT  
TGGAGACAACGGTGCCTTAGGTCAAGCTCCGTACATCCACCTGATTAACCGAGATGAGCACGAACAGTATTACGCTG  
TGTTCACTGGTAGCGGAATCCGAGTGTTCGACCTTTCTGGTAACGAGAAGCAAGTTAGGTATCCTAACGGTTCCAAC  
TACATCAAGACCGCTAATCCACGTAACGACCTGCGAATGGTACTGTAGCAGACTATACGTTTCATCGTTAACCGTAA  
CGTTGTTGCACAGAAGAACAAGTCTGTCAACTTACCGAATTACAACCCTAATCAAGACGGATTGATTAACGTTT  
GTGGTGGTCACTAGTATGGTAGGGAATAATTGTACACATTAACGGTAAAGACGTTGCGAAGTATAAGATACCCAGATGGT  
AGTCAACCTGAACACAGTAAACAATACGGATGCCAATGGTTAGCTGAAGAGTTAGCCAAGCAGATGCGCACTAAGT  
GTCTGATTGGACTGTAAATGTAGGGCAAGGGTTCATCCATGTGACCCGACCTAGTGGTCAACAGATTGACTCCTTCA  
CGACTAAAGATGGCTACGCAGACAGTTGATTAACCCTGTGACCCACTACGCTCAGTCGTTCTCTAAGCTGCCACCT  
AATGCTCCTAACGGCTACATGGTGAAAATCGTAGGGGACGCTCTAAGTCTGCCGACCAGTATTACGTTCCGGTATGA  
CGCTGAGCGGAAAGTTTGGACTGAGACTTTAGGTTGGAACACTGAGGACCAAGTTCTATGGGAAACCATGCCACACG  
CTCTTGTCGAGCCGCTGACGGTAATTTGACTTCAAGTGGCTTGAGTGGTCTCCTAAGTCTTGTTGGTGCAGTTGAC  
ACCAACCCTTGGCCTTCTTTTGGTTCAAGTATTAACGATGTGTTCTTCTTCCGTAACCGCTTAGGATTCTTATAG  
TGGGGAGAACATCATATTGAGTCGTACAGCCAAATACTTCAACTTCTACCCTGCGTCCATTGCGAACCTTAGTGATG  
ACGACCCTATAGACGTAGCTGTGAGTACCAACCGAATAGCAATCCTTAAGTACGCCGTTCCGTTCTCAGAAGAGTTA  
CTCATCTGGTCCGATGAAGCACAAATTCGTCTGACTGCCTCGGGTACTCTCACATCTAAGTCGGTTGAGTTGAACCT  
AACGACCCAGTTTACGCTACAGGACCGAGCGAGACCTTTTGGGATTGGGCGTAATGTCTACTTTGCTAGTCCGAGGT  
CCAGCTTACGCTCCATCCACAGGTACTACGCTGTGCAGGATGTGAGTTCGGTTAAGAATGCTGAGGACATTACATCA  
CACGTTCCCTAACCTACATCCCTAATGGTGTGTTGAGTATTTGCGGAAGTGGTACGGAAAACCTTCTGTTCCGGTACTATC  
TCACGGGGACCTAGTAAAATCTTCATGTACAAAATTCCTGTACCTGAACGAAGAGTTAAGGCAACAGTCGTGGTCTC  
ATTGGGACTTTGGGGAAAACGTACAGGTTCTAGCTTGTGAGAGTATCAGCTCAGATATGTATGTGATTCTTCCGAAT  
GAGTTCAATACGTTCCCTAGCTAGAATCTCTTTCACTAAGAACGCCATTGACTTACAGGGAGAACCCTATCGTGCCTT  
TATGGACATGAAGATTGATACACGATTCCCTAGTGGAAACATAACAACGATGACACATTCACTACCTCTATTTCATATTC  
CAACAATTTATGGTGCAAACCTTCGGGAGGGGGCAAAATCACTGTATTGGAGCCTGATGGTAAAGATAACCGTGTATTGAG  
CAACACTACGGCTGGGTGGAATAGCGACCTTGGCTGAGACTCAGCGGTAACCTGGAGGGACGCATGGTGTACATTTGG  
GTTCAACATTAACCTTCGTATATGAGTTCTCTAAGTTCCTCATCAAGCAGACTGCCGACGACGGGTCTACCTCCACGG  
AAGACATTTGGGCGCTTACAGTTACGCCGAGCGTGGGTTAACTACGAGAACTCTGGTACGTTTTGACATTTATGTTGAG  
AACCAATCGTCTAACTGGAAGTACACAATGGCTGGTGGCCGATTAGGCTCTAACACTCTGAGGGCTGGGAGACTGAA  
CTTAGGGACCGGACAATATCGATTCCCTGTGGTTGGTAACGCCAAGTTCAACACTGTATACATCTTGTGAGATGAGA  
CTACCCCTCTGAACATCATTGGGTGTGGCTGGGAAGGTAACACTTACGGAGAAGTTCCGGTATTTAATTAATATAT  
CTCCCTGTGGTGGCTCGAAATTAATACGACTCACTATAGGGAGAACAATACGACTACGGGAGGGTTTTCTTATGATG  
ACTATAAGACCTACTAAAAGTACAGACTTTGAGGTATTCACTCCGGCTCACCATGACATTCCTGAAGCTAAGGCTGC  
TGGTATTGAGCCGAGTTTCCCTGATGCTTCCGAGTGTGTACGTTGAGCCTCTATGGGTTCCCTCTAGCTATCGGTG  
GTAACCTGCGGGGACCAGTGTGTTTGGTTACGAGCGACCAAGTGTGGCGACTTAGTGGAAAGGCTAAGCGAAAGTTC  
CGTAAGTTAATCATGGAGTATCGCGATAAGATGCTTGAGAAGTATGATACTCTTTGGAATTACGTATGGGTAGGCAA  
TACGTCCCACATTCGTTTCTCAAGACTATCGGTGCGGTATTCCATGAAGAGTACACACGAGATGGTCAATTTCACT  
TATTTACAATCACGAAAGGAGGATAAACCATATGTGTTGGGCGAGCCGCAATACCTATCGCTATATCTGGCGCTCAGGC  
TATCAGTGGTCAGAACGCTCAGGCCAAAATGATTGCCGCTCAGACCGCTGCTGGTTCGTGCTCAAGCTATGGAAATCA  
TGAGGCAGACGAACATCCAGAATGCTGACCTATCGTTGCAAGCTCGAAGTAACTTGAGGAAGCGTCCGCCGAGTTG  
ACCTCACAGAACATGCAGAAGGTCCAAGCTATTGGGTCTATCCGAGCGGCTATCGGAGAGAGTATGCTTGAAGGTTT  
CTCAATGGACCGCATTAAAGCGAGTCACAGAAGGACAGTTTATTCCGGGAAGCCAATATGGTAACTGAGAATCTATCGCC  
GTGACTACCAAGCAATCTTCGCACAGCAACTTGGTGGTACTCAAAGTGTGCAAGTCAGATTGACGAAATCTATAAG  
AGCGAACAGAAAACAGAAGAGTAAGCTACAGATGGTTCTGGACCCACTGGCTATCATGGGGTCTTCCGCTGCGAGTGC  
TTACGCATCCGGTGCCTTCGACTCTAAGTCCACAATAAGGCACCTATTGTTGCCGCTAAAGGAACCAAGACGGGGA  
GGTAATGAGCTATGAGTAAAATTGAATCTGCCCTTCAAGCGGCACAACCGGGACTCTCTCGGTTACGTGGTGGTGT  
GGAGGTATGGGCTATCGTGCAGCAACCCTCAGGCCGAACAGCCAAGGTCAAGCCTATTGGACACCATTGGTCCGTT  
CGCTAAGGCTGGTGCCGATATGTATACCGCTAAGGAACAACGAGCACGAGACCTAGCTGATGAACGCTCTAACGAGA  
TTATCCGTAAGCTGACCCCTGAGCAACGTCGAGAAGCTCTCAACAACGGGACCCTTCTGTATCAGGATGACCCATAC  
GCTATGGAAGCACTCCGAGTCAAGACTGGTTCGTAACGCTGCGTATCTTGTGGACGATGACGTTATGCAGAAGATAAA  
AGAGGGTGTCTTCCGTACTCGCGAAGAGATGGAAGAGTATCGCCATAGTCGCCTTCAAGAGGGCGCTAAGGTATACG  
CTGAGCAGTTCCGCATCGACCCTGAGGACGTTGATTATCAGCGTGGTTTTCAACGGGGACATTACCGAGCGTAACATC  
TCGCTGTATGGTGCATGATAACTTCTTGGCCAGCAAGCTCAGAAGGGCGCTATCATGAACAGCCGAGTGGAACT  
CAACGGTGTCTTCAAGACCCTGATATGCTGCGTCCGACTCTGCTGACTTCTTTGAGAAGTATATCGACAACG

GTCTGGTTACTGGCGCAATCCCATCTGATGCTCAAGCCACACAGCTTATAAGCCAAGCGTTTCAGTGACGCTTCTAGC  
CGTGCTGGTGGTGGTACTTCCCTGATGCGAGTCGGTGACAAGAAGGTAACACTTAACGGAGCCACTACGACTTACCG  
AGAGTTGATTGGTGAGGAACAGTGAACGCTCTCATGGTACAGCACAACTTCTCAGTTTGAGACTGACGCGAAGC  
TGAACGAGCAGTATCGCTTGAAGATTAACCTCTGCGCTGAACCAAGAGGACCCAAGGACAGCTTGGGAGATGCTTCAA  
GGTATCAAGGCTGAAGTAGATAAAGGTCCAACCTGATGAGCAGATGACACCACAACGTGAGTGGCTAATCTCCGCACA  
GGAACAAGTTCAGAATCAGATGAACGCATGGACGAAAGCTCAGGCCAAGGCTCTGGACGATTCCATGAAGTCAATGA  
ACAACTTGACGTAATCGACAAGCAATTCAGAAAGCGAATCAACGGTGAGTGGGTCTCAACGGATTTTAAGGATATG  
CCAGTCAACGAGAACACTGGTGGTTCAGCATAGCGATATGGTTAACTACGCCAATAAGAAGCTCGCTGAGATTGA  
CAGTATGGACATTCCAGACGGTGCCAAGGATGCTATGAAGTTGAAGTACCTTCAAGCGGACTCTAAGGACGGAGCAT  
TCCGTACAGCCATCGGAACCATGGTCACTGACGCTGGTCAAGAGTGGTCTGCCGCTGTGATTAAACGGTAAGTTACCA  
GAACGAACCCAGCTATGGATGCTCTGCGCAGAATCCGCAATGCTGACCCTCAGTTGATTGCTGCGCTATACCCAGA  
CCAAGCTGAGCTATTCTGACGATGGACATGATGGACAAGCAGGGTATTGACCCTCAGGTTATTCTTGATGCCGACC  
GACTGACTGTTAAGCGGTCCAAAGAGCAACGCTTTGAGGATGATAAAGCATTTCGAGTCTGCACTGAATGCATCTAAG  
GCTCCTGAGATTGCCCGTATGCCAGCGTCACTGCGCGAATCTGCACGTAAGATTTATGACTCCGTTAAGTATCGCTC  
GGGGAACGAAAGCATGGCTATGGAGCAGATGACCAAGTTCCTTAAGGAATCTACCTACACGTTCACTGGTGATGATG  
TTGACGGTGATACCGTTGGTGTGATTCCTAAGAATATGATGCAGGTTAACTCTGACCCGAAATCATGGGAGCAAGGT  
CGGGATATTCTGGAGGAAGCACGTAAGGGAATCATTGCGAGCAACCCTTGATAACCAATAAGCAACTGACCATGTA  
TTCTCAAGGTGACTCCATTTACCTTATGGACACCACAGGTCAAGTCAGAGTCCGATACGACAAAGAGTTACTCTCGA  
AGGTCTGGAGTGAGAACCAGAAGAACTCGAAGAGAAAGCTCGTGAGAAGGCTCTGGCTGATGTGAACAAGCGAGCA  
CCTATAGTTGCCGCTACGAAGGCCCGTGAAGCTGCTGCTAAACGAGTCCGAGAGAAACGTAACAGACTCCTAAGTT  
CATCTACGGACGTAAGGAGTAACATAAAGGCTACATAAAGGAGGCCCTAAATGGATAAGTACGATAAGAACGTACCAAG  
TGATTATGATGGTCTGTTCCAAAAGGCTGCTGATGCCAACGGGGTCTTATGACCTTTTACGTAAGTGCCTTGGA  
CAGAATCACGATTTGTGCCTACAGCAAAATCTAAGACTGGACCATTAGGCATGATGCAATTTACCAAGGCAACCGCT  
AAGGCCCTCGGTCTGCGAGTTACCGATGGTCCAGACGACGACCGACTGAACCCTGAGTTAGCTATTAATGCTGCCGC  
TAAGCAACTTGCAGGTCTGGTAGGGAAAGTTTATGGCGATGAACTCAAAGCTGCCCTTGCGTACAACCAAGGCGAGG  
GACGCTTGGGTAATCCACAACCTTGAGGCGTACTCTAAGGGAGACTTCGCATCAATCTCTGAGGAGGGACGTAAC  
ATGCGTAACCTTCTGGATGTTGCTAAGTCACCTATGGCTGGACAGTTGGAACTTTTGGTGGCATAACCCCAAAGGG  
TAAAGGCATTCCGGCTGAGGTAGGATTGGCTGGAATGCTCACAAGCAGAAAGTAACACAGGAATCTCTGAGTCCA  
CAAGTTTTGACGTTAAGGGTATCGAACAGGAGACTACGGCGAAACCATTTCGCCAAGGACTTTTGGGAGACCCAGGA  
GAAACACTTGACGAGTACAACAGTCGTTCAACCTTCTCGGATCAAAAATGCTGCCGAAGCTGAACTCTCCAATC  
AGTCGCTGGGATGGCTTTCCGCTGCTGGTCTCGATAATGGTTTTGATGTGTTTTAAAGACACCATTACGCCGACTC  
GCTGGAACCTCTCACATCTGGACTCCAGAGGAGTTAGAGAAGATTGAAACAGAGGTTAAGAACCCTGCGTACATCAAC  
GTTGTAACCTGGTGGTTCCTGAGAACCTCGATGACCTCATTAAATTTGGCTAACGAGAACCTTTGAGAATGACTCCCG  
CGCTGCCGAGGCTGGCCTAGGTGCCAAACTGAGTCTGGTATTATTGGTGGTGGTGGTGGTGGTGGTGGTGGTGGTGGT  
CTATGGTGGTGGTGGTGGTGGTGGTGGTGGTGGTGGTGGTGGTGGTGGTGGTGGTGGTGGTGGTGGTGGTGGTGGT  
AACGTTGCATCCGAAGGTCTCCGTACCTCCGTAGCTGGTGGTGGTGGTGGTGGTGGTGGTGGTGGTGGTGGTGGTGGT  
TGTGTTTTGGCGCAGGCATGCTGCAATCAGTGACGCTGTAGCTGCTGGACTGAAACGCAGTAAACCAGAAGCTGAGT  
TCGACAATGAGTTCATCGGTCTATGATGCGATTGGAAGCCCGTGAGACAGCACGAAACGCCAACTCTGCGGACCTC  
TCTCGGATGAACACTGAGAACATGAAGTTTGAAGGTGAACATAATGGTGTCCCTTATGAGGACTTACCAACAGAGAG  
AGGTGCCGTGGTGTACATGATGGCTCCGTTCTAAGTGCAAGCAACCCAATCAACCCTAAGACTCTAAAAGAGTTCT  
CCGAGGTTGACCCTGAGAAGGCTGCGCGAGGAATCAAACCTGGCTGGGTTACCGGAGATTGGCTTGAAGACCTTGGGG  
TCTGACGATGCTGACATCCGTAGAGTGGCTATCGACCTCGTTCGCTCTCCTACTGGTATGCAGTCTGGTGCCTCAGG  
TAAGTTCGGTGCAACAGCTTCTGACATCCATGAGAGACTTCATGGTACTGACCAGCGTACTTATAATGACTTGTACA  
AAGCAATGTCTGACGCTATGAAAGACCCTGAGTTCCTACTGGCGGCGCTAAGATGTCCCGTGAAGAACTCGATAC  
ACTATCTACCGTAGAGCGGCACTAGCTATTGAGCGTCCAGAACTACAGAAGGCACACTCACTCCGTCTGAGAGAATCGT  
TATGGACATCATTAAAGCGTCACTTTGACACCAAGCGTGAACCTATGGAAAACCCAGCAATATTCCGGTAACACAAAG  
CTGTGAGTATCTTCCCTGAGAGTCGCCACAAAGTACTTACGTTCCCTCACGTATATGACCCTCATGCCAAGGCGCTG  
ATGATTCAACGCTACGGTGCCGAAGGTTTGAGGAAGGGATTGCCGCTCATGGATGAACAGCTACGTCTCCAGACC  
TGAGGTCAAGGCCAGAGTCGATGAGATGCTTAAAGGAATTACAGGGGTGAAGGAAGTAACACCAGAGATGGTAGAGA  
AGTACGCTATGGATAAGGCTTATGGTATCTCCCACTCAGACCAGTTCACCAACAGTTCATAATAGAAGAGAACATT  
GAGGGCTTAGTAGGTATCGAGAATAACTCATTCCCTTGGAGCACGTAACCTTGTGTTGATTTCGGACCTATCCATCACTAT  
GCCAGACGGACAGCAATTTCTCAGTGAATGACCTAAGGGACTTCGATATGTTCCGCATCATGCCAGCGTATGACCGCC  
GTGTCAATGGTGACATCGCCATCATGGGGTCTACTGGTAAAACCTAAGGAACTTAAAGGATGAGATTTTGGCTCTC  
AAAGCGAAAGCTGAGGGAGACGGTAAGAAGACTGGCGAGGTACATGCTTTAATGGATAACCGTTAAGATTCTTACTGG  
TCGTGCTAGACGCAATCAGGACACTGTGTGGGAAACCTCACTGCGTGCCATCAATGACCTAGGGTCTTTCGCTAAGA  
ACGCCTACATGGGTGCTCAGAACATTACGGAGATTGCTGGGATGATTGCTCACTGGTAACTTCGTGCTCTAGGGCAT  
GGTATCCCAATTTCTGCGTGATACACTCTACAAGTCTAAACCAGTTTTAGCTAAGGAACTCAAGGAACTCCATGCGTC

TCTGTTTCGGGAAGGAGGTGGACCAGTTGATTTCGGCCTAAACGTGCTGACATTGTGCAGCGCCTAAGGGAAGCAACTG  
ATACCGGACCTGCCGTGGCGAACATCGTAGGGACCTTGAAGTATTCAACACAGGAACTGGCTGCTCGCTCTCCGTGG  
ACTAAGCTACTGAACGGAACCACTAACTACCTTCTGGATGCTGCGCGTCAAGGTATGCTTGGGGATGTTATTAGTGC  
CACCTAACAGGTAAGACTACCCGCTGGGAGAAAGAAGGCTTCTTCGTGGTGCCTCCGTAACCTCTGAGCAGATGG  
CTGGCATCAAGTCTCTCATCAAGGAACATATGGTACGCGGTGAGGACGGGAAGTTTACCGTTAAGGACAAGCAAGCG  
TTCTCTATGGACCCACGGGCTATGGACTTATGGAGACTGGCTGACAAGGTAGCTGATGAGGCAATGCTGCGTCCACA  
TAAGGTGTCCTTACAGGATTTCCCATGCGTTCGGGAGCACTAGGTAAGATGGTTATGCAGTTTAAAGTCTTTCCTATCA  
AGTCCCTTAACTCTAAGTTTCTGCGAACCTTCTATGATGGATACAAGAACAACCGAGCGATTGACGCTGCGCTGAGC  
ATCATCACCTCTATGGGTCTCGCTGGTGGTTTTCTATGCTATGGCTGCACACGTCAAAGCATAACGCTCTGCCTAAGGA  
GAAACGTAAGGAGTACTTGGAGCGTGCCTGGACCCAACCATGATTGCCACGCTGCGTTATCTCGTAGTTCTCAAT  
TGGGTGCTCCTTTGGCTATGGTTGACCTAGTTGGTGGTTTTAGGGTTTCGAGTCTCCAAGATGGCTCGCTCTACG  
ATTCTACCTAAGGACACCGTGAAGGAACGTGACCCAACAACCGTACACCTCTAGAGAGGTAATGGGCGCTATGGG  
TTCAAACCTTCTGGAACAGATGCCTTCGGCTGGCTTTGTGGCTAACGTAGGGGCTACCTTAATGAATGCTGCTGGCG  
TGGTCAACTCACCTAATAAAGCAACCGAGCAGGACTTTCATGACTGGTCTTATGAACTCCACAAAAGAGTTAGTACCG  
AACGACCCATTGACTCAACAGCTTGTGTTGAAGATTTATGAGGCGAACGGTGTAACTTGGAGGAGCGTAGGAAATA  
ATACGACTCACTATAGGGAGAGGCGAAATAATCTTCTCCCTGTAGTCTCTTAGATTTACTTTAAGGAGGTCAAATGG  
CTAACGTAATTTAAACCGTTTTGACTTACCAGTTAGATGGCTCCAATCGTGATTTTAAATATCCCGTTTTGAGTATCTA  
GCCCGTAAGTTTCGTAGTGGTAACCTCTTATTGGTGTAGACCGAAAGGTCCTTACGATTAATACAGACTATCGCTTTGC  
TACACGTAATACTATCTCTGACAAAGGCTTGGGGTCCAGCCGATGGCTACACGACCATCGAGTTACGTCGAGTAA  
CCTCCACTACCGACCGATTGGTTGACTTTACGGATGGTTCAATCCTCCGCGCGTATGACCTTAAAGTTCGCTCAGATT  
CAAACGATGCACGTAGCGGAAGAGGCCCGTACCTCACTACGGATACTATCGGTGTCAATAACGATGGTCACTTGGGA  
TGCTCGTGGTTCGATGCAATTTGTAACCTAGCGAACGCCGTGGATGACCGCGATGCTGTTCCGTTTTGGTCAACTAAAGA  
CCATGAACCAGAACTCATGGCAAGCACGTAATGAAGCCTTACAGTTCGCTAATGAGGCTGAGACTTTTCAGAAACCAA  
GCGGAGGGCTTTAAGAACGAGTCCAGTACCAACGCTACGAACACAAGCAGTGGCGCGATGAGACCAAGGGTTTTCCG  
AGACGAAGCCAAGCGGTTTCGAGAATACGGCTGGTCAATACGCTACATCTGCTGGGAACTCTGCTTCCGCTGCGCATC  
AATCTGAGGTAACGCTGAGAATCTGCCACAGCATCCGCTAACTCTGCTCATTGGCAGAACAGCAAGCAGACCGT  
GCGGAACGTGAGGCAGACAAGCTGGAAAATTACAATGGATTGGCTGGTGAATGATAAGGTAGATGGAACCAATGT  
GTACTGAAAAGGAAATATTACGCTAACGGGCGCCTTTACATGACCACAACCGTTTTGACTGTGGCCAGTATCAAC  
AGTTCTTTGGTGGTGTACTAATCGTTACTCTGTCTGATGGAGTGGGAGATGAGAACCGGATGGCTAGTATGTTCAA  
CGTAGAGATTGGACAACAGCGATAGGCGGTAACATCCAGTTAGTAGTAAACGGACAGATCATCACCAAGGTGGAGC  
CATGACCGGTGAGCTAAAATTGCAGAATGGGCATGTTCTTCAATTAGAGTCCGCATCCGACAAGGCGCACTATATTC  
TATCTAAAGATGGTAACAGGAATAACTGGTACATTGGTAGAGGGTACAGATAACAACAATGACTGTACCTTCCACTCC  
TATGTACATGGTACGACCTTAACTCAAGCAGGACTATGCAGTAGTTAAACAACACTTCCACGTAGGTACAGGCCGT  
TGTGGCCACTGATGGTAATATTCAAGGTAAGTGGGGAGGTAAATGGCTGGATGCTTACCTACGTGACAGCTTCG  
TTGCGAAGTCCAAGGCGTGGACTCAGGTGTGGTCTGGTAGTGTGGCGGTGGGGTAAAGTGTGACTGTTTTACAGGAT  
CTCCGCTTCCGCAATATCTGGATTAAGTGTGCCAACAACCTTTGGAACCTTCTCCGTAAGTGGCCCCGATGGAATCTA  
CTTCATAGCCTCTGATGGTGGATGGTTACGATTCCAATACACTCCAACGGTCTCGGATTCAAGAATATTGCAGACA  
GTCGTTTCAGTACCTAATGCAATCATGGTGGAGAACGAGTAATTGGTAAATCACAAGGAAAGACGTGTAGTCCACGGA  
TGGACTCTCAAGGAGGTACAAGGTGCTATCATTAGACTTTAAACAACGAATTGATTAAGGCTGCTCCAATTGTTGGGA  
CGGGTGTAGCAGATGTTAGTGTGCTGACTGTTCTTTGGGTTAAGCCTTAAACGAATGGTCTACGTTGCTGCTATCGCC  
TACACAGTGGTTAGATTGGTGCCAAGGTAGTCGATAAGATGATTGACTGGAAGAAAGCCAATAAGGAGTGATATGT  
ATGGAAAAGGATAAGAGCCTTATTACATTCTTAGAGATGTTGGACACTGCGATGGCTCAGCGTATGCTTGGCGACCT  
TTCGGACCATGAGCGTTCGCTCTCCGCAACTCTATAATGCTATTAACAACTGTTAGACCGCCACAAGTTCCAGATTG  
GTAAGTTGCAGCCGGATGTTACATCTTAGGTGGCCTTGTGGTGTCTTGAAGAGTACAAGAGAAAGTCCGGTGT  
AACGGTCTTACGGATGATGATATTTACACATTACAGTGTATACTCAAGGCCACTACAGATAGTGGTCTTTATGGAT  
GTCATTGTCTATACGAGATGCTCCTACGTGAAATCTGAAAGTTAACGGGAGGCATTATGCTAGAATTTTTACGTAAG  
CTAATCCCTTGGGTTCTCGCTGGGATGCTATTCGGGTTAGGATGGCATCTAGGGTCAGACTCAATGGACGCTAAATG  
GAAACAGGAGGTACACAATGAGTACGTTAAGAGAGTTGAGGCTGCGAAGAGCACTCAAAGAGCAATCGATGCGGTAT  
CTGCTAAGTATCAAGAAGACCTTCCGCGCTGGAAGGGAGCACTGATAGGATTAATTTCTGATTTGCGTAGCGACAAT  
AAGCGGTTGCGCGTACAGTCAAACCTACCAGGAACTCCGATGGTACGTGTGGATTTCGAGCCTGATGGTTCGAGCCGA  
ACTTGACGACCGAGATGCTAAACGTATTCTCGCAGTGACCCAGAAGGGTGACGCATGGATTTCGTGCGTTACAGGATA  
CTATTTCGTGAACTGCAACGTAAGTAGGAAATCAAGTAAGGAGGCAATGTGTCTACTCAATCCAATCGTAATGCGCTC  
GTAGTGGCGCAACTGAAAGGAGACTTCGTGGCGTTTCTATTTCGTCTTATGGAAGGCGCTAAACCTACCAGTGGCCAC  
TAAGTGTACAGATTGACATGGCTAAGGTGCTGGCGAATGGAGACAACAAGAAGTTCATCTTACAGGCTTTCCGTGGTA  
TCGGTAAGTTCGTTTACATGATGTGCGTTCGTTGTGTGGTCTTATGGAGAGACCCTCAGTTGAAGATACTTATCGTA  
TCAGCCTCTAAGGAGCGTGCAGACGCTAACTCCATCTTTATTAAGAACATCATTGACCTGCTGCCATTCCTATCTGA  
GTTAAAGCCAAGACCCGGACAGCGTACTCGGTAATCAGCTTTGATGTAGGCCAGCCAATCCTGACCACTCTCCTA

GTGTGAAATCAGTAGGTATCACTGGTCAGTTAACTGGTAGCCGTGCTGACATTATCATTGCGGATGACGTTGAGATT  
CCGTCTAACAGCGCAACTATGGGTGCCCCTGAGAAGCTATGGACTCTGGTTTCAGGAGTTTCGCTGCGTTACTTAAACC  
GCTGCTTCCCTCTCGCGTTATCTACCTTGGTACACCTCAGACAGAGATGACTCTCTATAAGGAACCTTGAGGATAACC  
GTGGGTACACAACCATTATCTGGCCTGCTCTGTACCCAAGGACACGTGAAGAGAACCTCTATTACTCACAGCGTCTT  
GCTCCTATGTTACGCGCTGAGTACGATGAGAACCCTGAGGCACCTTGCTGGGACTCCAACAGACCCAGTGCCTTTGA  
CCGTGATGACCTGCGCGAGCGTGAGTTGGAATACGGTAAGGCTGGCTTTACGCTACAGTTTCATGCTTAAACCCTAAC  
TTAGTGATGCCGAGAAGTACCCGCTGAGGCTTCGTGACGCTATCGTAGCGGCCTTAGACTTAGAGAAGGCCCAATG  
CATTACCAGTGGCTTCCGAACCGTCAGAACATCATTGAGGACCTTCCTAACGTTGGCCTTAAGGGTGATGACCTGCA  
TACGTACCACGATTGTTCCAACAACCTCAGGTGAGTACCAACAGAAGATTCTGGTCATTGACCCCTAGTGGTCGCGGTA  
AGGACGAAACAGGTTACGCTGTGCTGTACACACTGAACGGTTACATCTACCTTATGGAAGCTGGAGGTTTCCGTGAT  
GGCTACTCCGATAAAGACCCCTTGAGTTACTCGCTAAGAAGGCAAGCAATGGGGAGTCCAGACGGTTGTCTACGAGAG  
TAACTTCCGGTGACGGTATGTTCCGTAAGGTATTGAGTCTTACCTTCTTAAACACCACAACCTGTGCGATGGAAGAGA  
TTCGTGCCCGTGGTATGAAAGAGATACGTATTTGCGATACCCTTGAGCCAGTCATGCAGACTCACCGCCTTGTAATT  
CGTGATGAGGTCATTAGGGCCGACTACCAGTCCGCTCGTGACGTAGACGGTAAGCATGACGTTAAGTACTCGTTGTT  
CTACCAGATGACCCGTATCACTCGTGAGAAAGGCGCTCTGGCTCATGATGACCGATTGGATGCCCTTGCGTTAGGCA  
TTGAGTATCTCCGTGAGTCCATGCAGTTGGATTCCGTTAAGGTCGAGGGTGAAGTACTTGCTGACTTCCCTGAGGAA  
CACATGATGCGTCTACGGTTGCTGCTACGCATATCATTGAGATGTCTGTGGGAGGAGTTGATGTGTACTCTGAGGA  
CGATGAGGGTTACGGTACGTCTTTTATTGAGTGGTGATTTATGCATTAGGACTGCATAGGGATGCACTATAGACCAC  
GGATGGTCAGTTCTTTAAGTTACTGAAAAGACACGATAAATTAATACGACTCACTATAGGGAGAGGAGGGACGAAAG  
GTTACTATATAGATACTGAATGAATACTTATAGAGTGCATAAAGTATGCATAATGGTGTACCTAGAGTGACCTCTAA  
GAATGGTGATTATATTGTATTAGTATCACCTTAACTTAAGGACCAACATAAAGGGAGGAGACTCATGTTCCGCTTAT  
TGTTGAACCTACTGCGGCATAGAGTACCTACCGATTTCTTGTGGTACTTTGTGCTGCCCTTGGGTACGCATCTCTT  
ACTGGAGACCTCAGTTCACTGGAGTCTGTGCTTTGCTCTATACTCACTTGTAGCGATTAGGGTCTTCCCTGACCGACT  
GATGGCTCACCGAGGGATTACGCGGTATGATTGCATCACACCCTTCATCCCTATAGAGTCAAGTCCCTAAGGTATAC  
CCATAAAGAGCCTCTAATGGTCTATCCTAAGGTCTATACCTAAAGATAGGCCATCCTATCAGTGTACCTAAAGAGG  
GTCTTAGAGAGGGCCTATGGAGTTCCTATAGGGTCCCTTAAAAATATACCATAAAAAATCTGAGTGACTATCTCACAGT  
GTACGGACCTAAAGTTCCTCCCATAGGGGGTACCTAAAGCCCAGCCAATCACCTAAAGTCAACCTTCGGTTGACCTTG  
AGGGTTCCTCAAGGGTTGGGGATGACCTTTGGGTTTGTCTTTGGGTGTTACTTCCCCATAGGGGGTACCTAAAGCC  
CAGCCAACTCACCTAAAGTCAACCTTCGGTTGACCTTGAGGGTTCCTTAAGGGTTGGGGATGACCTTGGGTTTGTCT  
TTGGGTGTTACCTTGAGTGTCTCTCTGTGTCCCTATCTGTTACAGTCTCCTAAAGTATCCTCCTAAAGTCACTCCT  
AACGTCCATCCTAAAGCCAACACCTAAAGCCTACACCTAAAGACCCATCAAGTCAACGCCTATCTTAAAGTTTAAAC  
ATAAAGACCAGACCTAAAGACCAGACCTAAAGACACTACATAAAGACCAGACCTAAAGACGCCTTGTTGTTAGCCAT  
AAAGTGATAACCTTTAATCATTGTCTTTATTAATACAACCTCACTATAAGGAGAGACAACCTTAAAGAGACTTAAAAGA  
TTAATTTAAAATTTATCAAAAAGAGTATTGACTTAAAGTCTAACCTATAGGATACTTACAGCCATCGAGAGGGACAC  
GGCGAATAGCCATCCCAATCGACACCGGGGTCAACCGGATAAGTAGACAGCCTGATAAGTTCGCACGAAAAACAGGTA  
TTGACAACATGAAGTAACATGCAGTAAGATACAAATCGCTAGGTAACACTAGCAGCGTCAACCGGGCGCACAGTGCC  
TTCTAGGTGACTTAAGCGCACACGGCACATAAGGTGAAACAAAACGGTTGACAACATGAAGTAAACACGGTACGAT  
GTACCACATGAAACGACAGTGAGTACCACACTGAAAGGTGATGCGGTCTAACGAAACCTGACCTAAGACGCTCTTT  
AACAATCTGGTAAATAGCTCTTGAGTGCATGACTAGCGGATAACTCAAGGGTATCGCAAGGTGCCCTTTATGATATT  
CACTAATAACTGCACGAGGTAACACAAGATGGCTATGTCTAACATGACTTACAACAACGTTTTTCGACCACGCTTACG  
AAATGCTGAAAGAAAACATCCGTTATGATGACATCCGTGACACTGATGACCTGCACGATGCTATTCACATGGCTGCC  
GATAATGCAGTTCGCGACTACTACGCTGACATCTTTAGCGTAATGGCAAGTGAGGGCATTGACCTTGAGTTTGAAGA  
CTCTGGTCTGATGCCTGACACCAAGGACGTAATCCGCATCCTGCAAGCGCGTATCTATGAGCAATTAACGATTGACC  
TCTGGGAAGACGCAGAAGACTTGCTCAATGAATACTTGGAGGAAGTCGAGGAGTACGAGGAGGATGAAGAGTAATGT  
CTACTACCAACGTGCAATACGGTCTGACCGCTCAAACGTACTTTTCTATAGCGACATGGTGCCTGTGGCTTTAAC  
TGCTCACTCGCAATGGCACAGCTCAAAGAACTGTACGAAAACAACAAGGCAATAGCTTTAGAATCTGCTGAGTGATA  
GACTCAAGGTGCTCCTAGCGAGTGGCCTTTATGATTATCACTTTACTTATGAGGGAGTAATGTATATGCTTACTAT  
CGGTCTACTCACCGCTCTAGGTCTAGCTGTAGGTGCATCCTTTGGGAAGGCTTTAGGTGTAGCTGTAGGTTCCCTACT  
TTACCGCTTGATCATCATAGGAATCATCAAAGGGGCACTACGCAAATGATGAAGCACTACGTTATGCCAATCCACA  
CGTCCAACGGGGCAACCGTATGTACACCTGATGGGTTGCAATGAAACAACGAATCGAACGCCTTAAGCGTGAACCTC  
CGCATTAAACCGCAAGATTAACAAGATAGGTTCCGGCTATGACAGAACGCACTGATGGCTTAAAGAAAGGTTATATGC  
CCAATGGCACACTATACGCTGCAAATCGGCGAATAGTGAGAACCTTGGCGAGAGAACAACCTCGAACGCCGCAAGGAA  
CAAGAGAGGGCGGCGTGGCATAGACGAAAGGAAAAGGTTAAAGCCAAGAACTCGCCGCACTTGAACAGGCACTAGC  
CAACACACTGAACGCTATCTCATAACGAACATAAAGGACACAATGCAATGAACATTACCGACATCATGAACGCTATC  
GACGCAATCAAAGCACTGCCAATCTGTGAACCTTGACAAGCGTCAAGGTATGCTTATCGACTTACTGGTCGAGATGGT  
CAACAGCGAGACGTGTGATGGCGAGCTAACCGAATAAATCAGGCACCTTGAGCATCAAGATTGGTGGACTACCTTGA  
AGTGTCTCACGGCTGACGCAGGGTTCAAGATGCTCGGTAATGGTCACTTCTCGGCTGCTTATAGTACCCCGCTGCTA

CCTAACAGAGTGATTAAGGTGGGCTTTAAGAAAGAGGATTTCAGGGCGCAGCCTATAACCGCATTCTGCCGCATGTATCA  
GGGTTCGTCCTGGTATCCCTAACGTCTACGATGTACAGCGCCACGCTGGATGCTATAACGGTGGTACTTGACGCACTTA  
AGGATTGCGAGCGTTTTCAACAATGATGCCATTATAAATACGCTGAGATTGCAAGCGACATCATTGATTGCAATTCCG  
GATGAGCATGATGAGTTAACTGGATGGGATGGTGGTGGTGGTGGTGGTGGTGGTGGTGGTGGTGGTGGTGGTGGTGGT  
CATCGCCTCATTGACATGCATAGCGGGAACATCATGTTCTCAAATGGAGACGTACCATACATCACCGACCCGGTAT  
CATTCTCGCAGAAGAAAGACGGTGGCGCATTTCAGCATCGACCCTGAGGAACCTCATCAAGGAAGTCGAGGAAGTCGCA  
CGACAGAAAGAAATTGACCGCGCTAAGGCCCGTAAAGAAGCTCACGAGGGGGCGCTTAGAGGCACGCAGATTCAAACG  
TCGCAACCGCAAGGCACGTAAAGCACACAAAGCTAAGCGCGAAAGAATGCTTGCTGCGTGGCGATGGGCTGAACGTC  
AAGAACGGCGTAACCATGAGGTAGCTGTAGATGTACTAGGAAGAACCAATAACGCTATGCTCTGGGTCAACATGTTT  
TCTGGGGACTTTAAGGCGCTTGAGGAACGAATCGCGCTGCCTGGCGTAATGCTGACCGGATGGCTATCGCTAATGG  
TCTTACGCTCAACATTGATAAGCAACTTGACGCAATGTTAATGGGCTGATAGTCTTATCTTACAGGTCATCTGCGGG  
TGGCCTGAATAGGTACGATTTACTAACTGGAAGAGGCCTAAATGAACACGATTAACATCGCTAAGAACGACTTCTC  
TGACATCGAACTGGCTGCTATCCCGTTCAACACTCTGGCTGACCATTACGGTGAGCGTTTTAGCTCGCGAACAGTTGG  
CCCTTGAGCATGAGTCTTACGAGATGGGTGAAGCACGCTTCCGCAAGATGTTTGAGCGTCAACTTAAAGCTGGTGG  
GTTGCGGATAACGCTGCCGCCAAGCCTCTCATCACTACCCTACTCCCTAAGATGATTGCACGCATCAACGACTGGTT  
TGAGGAAGTGAAAGCTAAGCGCGGCAAGCGCCGACAGCCTTCCAGTTCCTGCAAGAAATCAAGCCGGAAGCCGTAG  
CGTACATCACCATTAAGACCACTCTGGCTTGCCTAACAGTGCTGACAATACAACCGTTTCAGGCTGTAGCAAGCGCA  
ATCGGTTCGGGCCATTGAGGACGAGGCTCGCTTCGGTCGTATCCGTGACCTTGAAGCTAAGCACTTCAAGAAAAACGT  
TGAGGAACAACCTCAACAAGCGCGTAGGGCACGCTACAAGAAAGCATTATGCAAGTTGTCGAGGCTGACATGCTCT  
CTAAGGGTCTACTCGGTGGCGAGGCGTGGTCTTCGTGGCATAAGGAAGACTCTATTTCATGTAGGAGTACGCTGCATC  
GAGATGCTCATTGAGTCAACCGGAATGGTTAGCTTACACCGCCAAAATGCTGGCGTAGTAGGTCAAGACTCTGAGAC  
TATCGAACTCGCACCTGAATACGCTGAGGCTATCGCAACCCGTGCAGGTGCGCTGGCTGGCATCTCTCCGATGTTCC  
AACCTTGCGTAGTTCCTCCTAAGCCGTGGACTGGCATTACTGGTGGTGGCTATTGGGCTAACGGTCGTCGTCCTCTG  
GCGCTGGTGCCTACTCACAGTAAGAAAGCACTGATGCGCTACGAAGACGTTTACATGCCTGAGGTGTACAAAGCGAT  
TAACATTGCGCAAAACACCGCATGGAAAATCAACAAGAAAGTCTTAGCGGTTCGCCAACGTAATCACCAAGTGGAAGC  
ATTGTCCGGTCGAGGACATCCCTGCGATTGAGCGTGAAGAACTCCCGATGAAACCGGAAGACATCGACATGAATCCT  
GAGGCTCTCACCGCGTGGAAACGTGCTGCCGCTGCTGTGTACCAGCAAGGACAAGGCTCGCAAGTCTCGCCGTATCAG  
CCTTGAGTTTATGCTTGAGCAAGCAATAAGTTTGTCAACCTAACCATAAGGCCATCTGGTTCCCTTACAACATGGACTGGC  
GCGGTGCTGTTTTACGCTGTGTCAATGTTCAACCCGCAAGGTAACGATATGACCAAGGACTGCTTACGCTGGCGAAA  
GGTAAACCAATCGGTAAAGGAAGTTACTACTGGCTGAAAATCCACGGTGCAAACTGTGCGGGTGTGATAAGGTTCC  
GTTCCCTGAGCGCATCAAGTTTATTGAGGAAAACCACGAGAACATCATGGCTTGCCTAAGTCTCCACTGGAGAACA  
CTTGGTGGGCTGAGCAAGATTCTCCGTTCTGCTTCCCTTGCCTTCTGCTTTGAGTACGCTGGGGTACAGCACACGGC  
CTGAGCTATAACTGCTCCCTTCCGCTGGCGTTTTGACGGGTCTTGCTCTGGCATCCAGCACTTCTCCGCGATGCTCCG  
AGATGAGGTAGGTGGTCGCGCGGTTAACTTGCTTCTTAGTGAACCGTTTCAGGACATCTACGGGATTGTTGCTAAGA  
AAGTCAACGAGATTCTACAAGCAGACGCAATCAATGGGACCGATAACGAAGTAGTTACCGTGACCGATGAGAACACT  
GGTGAATCTCTGAGAAAGTCAAGCTGGGCACTAAGGCACTGGCTGGTCAATGGCTGGCTTACGGTGTACTCGCAG  
TGTGACTAAGCGTTCAGTCATGACGCTGGCTTACGGGTCCAAAGAGTTCGGCTTCCGTCAACAAGTGTGGAAGATA  
CCATTACGCCAGCTATTGATTCCGGCAAGGGTCTGATGTTCACTCAGCCGAATCAGGCTGCTGGATAACATGGCTAAG  
CTGATTTGGGAATCTGTGAGCGTGACGGTGGTAGCTGCGGTTGAAGCAATGAACTGGCTTAAGTCTGCTGCTAAGCT  
GCTGGCTGCTGAGGTCAAAGATAAGAAGACTGGAGAGATTCTTCGAAGCGTTGCGCTGTGCATTGGGTAACCTCTG  
ATGGTTTTCCCTGTGTGGCAGGAATACAAGAAGCCTATTTCAGACGCGCTTGAACCTGATGTTTCTCGGTGAGTTCCGC  
TTACAGCCTACCATTAACACCAACAAAGATAGCGAGATTGATGCACACAAACAGGAGTCTGGTATCGCTCCTAACTT  
TGTACACAGCCAAGACGGTAGCCACCTTCGTAAGACTGTAGTGTGGGCACACGAGAAGTACGGAATCGAATCTTTTG  
CACTGATTACGACTCCTTCCGGTACCATTCCGGCTGACGCTGCGAACCTGTTCAAAGCAGTGCGCGAAACTATGGTT  
GACACATATGAGTCTTGTGATGTACTGGCTGATTTCTACGACCAGTTCGCTGACCAGTTGCACGAGTCTCAATTGGA  
CAAAATGCCAGCACTTCCGGCTAAAGGTAACCTGAACCTCCGTGACATCTTAGAGTCGGACTTCGCGTTTCGCGTAAC  
GCCAAATCAATACGACTCACTATAGAGGGACAAACTCAAGGTCATTTCGAAGAGTGGCCTTTATGATTGACCTTCTT  
CCGGTTAATACGACTCACTATAGGAGAACCTTAAAGGTTAACTTTAAGACCCTTAAAGTGTAAATTAGAGATTTAAAT  
TAAAGAATTACTAAGAGAGGACTTTAAGT

>NRG-P0102

ATGCGTAACTTCGAAAAGATGACCAAACGTTCTAACCGTAATGCTCGTGACTTCGAGGCAACCAAAGGTGCGAAGTT  
GAATAAGACTAAGCGTGACCGCTCTCACAAGCGTAGCTGGGAGGGTCAGTAAGATGGGACGTTTTATATAGTGGTAAT  
CTGGCAGCATTCAAGGCAGCAACAAACAAGCTGTTCCAGTTAGACTTAGCGGTCAATTTATGATGACTGGTATGATGC  
CTATAACAAGAAAAGATTGCATACGGTTACGTATTGAGGACAGGAGTGGAAACCTGATTGATACTAGCACCTTCTACC  
ACCACGACGAGGACGTTCTGTTCAATATGTGTACTGATTGGTTGAACCATATGTATGACCAGTTGAAGGACTGGAAG  
TAATACGACTCAGTATAGGACAATGCTTAAAGTTCGCTCTTAGGAGTGGCCTTAGTCATTTAACCAATAGGAGATA

AACATTATGATGAACATTAAGACTAACCCTGTTTAAAGCCGTGTCTTTTCGTAGAGTCTGCCATTAAGAAGGCTCTGGA  
TAACGCTGGGTATCTTATCGCTGAAATCAAGTACGATGGTGTACGCGGGAACATCTGCGTAGACAATACTGCTAACA  
GTTACTGGCTCTCTCGTGTATCTAAAACGATTCCGGCACTGGAGCACTTAAACGGGTTTGATGTTTCGCTGGAAGCGT  
CTACTGAACGATGACCGTTGCTTCTACAAAGATGGCTTTATGCTTGATGGGGAACCTCATGGTCAAGGGCGTAGACTT  
TAACACAGGGTCCGGCCTACTGCGTACCAAATGGACTGACACGAAGAACCAAGAGTTCATGAAGAGTTATTCGTTG  
AACCAATCCGTAAGAAAGATAAAGTTCCCTTTAAGCTGCACACTGGACACCTTCACATAAAAAGTGTACGCTATCCTC  
CCGCTGCACATCGTGGAGTCTGGAGAAGACTGTGATGTCATGACGTTGCTCATGCAGGAACACGTTAAGAACATGCT  
GCCTCTGCTACAGGAATACTTCCCTGAAATCGAATGGCAAGCGGCTGAATCTTACGAGGTCTACGATATGGTAGAAC  
TACAGCAACTGTACGAGCAGAAGCGGAGCAGAAGGCCATGAGGGTCTCATTGTGAAAGACCCGATGTGTATCTATAAG  
CGCGTAAGAAATCTGGCTGGTGGAAAATGAAACCTGAGAACGAAGCTGACGGTATCATTACGGGCTGGTATGCGG  
TACAAAAGGCTCGCTAATGAAGTAAAGTATTGGTTTTGAGGTGCTTCTTGAGAGTGGTCTGTTAGTTAACGCCA  
CGAATATCTCTCGCCTTAATGGATGAGTTCAGTACGAGCAGTAAAAGAGGCCACCCTAAGTCAATGGGGATTCTTT  
AGCCCATACGGTATTGGCGACAACGATGCTTGTACTATTAACCTTACGATGGCTGGGCGTGTCAAATTAGCTACAT  
GGAGGAAACACCTGATGGCTCTTTGCGGCACCCATCGTTTCGTAATGTTCCGTGGCACCCGAGGACAACCCTCAAGAGA  
AAATGTAATCACACTGGCTCACCTTCGGGTGGGCCTTTCTGCGTTTATAAGGAGACACTTTATGTTTAAAGAAGGTTG  
GTAAATTCCTTGGCGCTTTGGCAGCTATCCTGACGCTTGCCTATATTCTTGGCGTATACCCTCAAGTAGCACTAGTA  
GTAGTTGGCGCTTGTACTTAGCGGCAGTGTGTGCTTGCCTGTGGAGTATAGTTAACTGGTAATACGACTCACTAAA  
GGAGGTACACACCATGATGTACTTAATGCCATTACTCATCGTCATTGTAGGATGCCTTGGCGCTCCACTGTAGCGATG  
ATGATATGCCAGATGGTACGCTTAATACGACTCACTAAAGGAGACACTATATGTTTCGACTTCATTACAACAAAAG  
CGTTAAGAATTTACGGTTCCCGTGCTGACCGTTCAATCGTATGTGCGAGCGAGCGCCGAGCTAAGATACCTCTTA  
TTGGTAACACAGTTCCTTTGGCACCGAGCGTCCACATCATTATCACCCGTGGTGACTTTGAGAAAGCAATAGACAAG  
AAACGTCCGGTCTTAGTGTGGCAGTGACCCGCTTCCCGTTCGTCCGTCTGTTACTCAAACGAATCAAGGAGGTGTT  
CTGATGGGACTGTTAGATGGTGAAGCCTGGGAAAAAGAAAACCCGCCAGTACAAGCAACTGGGTGTATAGCTTGCTT  
AGAGAAAGATGACCGTTATCCACACACCTGTAACAAAGGAGCTAACGATATGACCGAACGTGAACAAGAGATGATCA  
TTAAGTTGATAGACAATAATGAAGGTCGCCCAGATGATTTGAATGGCTGCGGTATTCTCTGCTCCAATGTCCCTTGC  
CACCTCTGCCCCGCAAATAACGATCAAAAAGATAACCTTAGGTGAAATCCGAGCGATGGACCCACGTAACCACATCT  
GAATAAACCTGAGGTAACCTTACAGATGACCAAGCCTTCCGCTGAGACAATCGAAGGTGTCACTAAGCCTTCCCCT  
ACATGCTGTTTGCAGACATTGAGGCTATCGAAGTGATTGCTCGTTCAATGACCGTTGAGCAGTTCAAGGATACCTGC  
TTCGGTAACACTTAAAGTACAGACTACGTGCTGTTGTAAGAAGTCAGAGTTAGCGTACTTAGAGAAAAGACCTAGCGAA  
AGCAGACTTCTATAAAGAAGTCTTTGAGAAACATAAGGATAAATGTTATGCATAACTTCAAGTCAACCCACCTGCC  
GACAGCCTATCTGATGACTTACATCTTGTCTCAGAGTGGTGCCGAAAGATGTGGGAAGAGACATTGACGATGCGTA  
CATCAAGCTGTATGAACTTTGGAAATCGAGAGGTCAATGACTATGTCAAACGTAAATACAGGTTCACTTAGTGTGGA  
CAATAAGAAGTTTTGGGCTACCGTAGAGTCTCGGAGCATTCTTCCGAGGTTCCAATCTACGCTGAGACCCCTAGACG  
AAGCTCTGGAGTTAGCCGAATGGCAATACGTTCCGGCTGGCTTTGAGGTTACTCGTGTGCGTCTTGTGTAGCACCG  
AAGTAATACGACTCACTATTAGGGAAGACTCCCTCTGAGAAACCAAACGAAACCTAAAGGAGATTAACATTATGGCT  
AAGAAGATTTTACCTCTGCGCTGGGTACCGCTGAACCTTACGCTTACATCGCCAAGCCGGACTACGGCAACGAAGA  
GCGTGGCTTTGGGAACCCCTCGTGGTGTCTATAAAGTTGACCTGACTATTCCCAACAAAGACCCGCGCTGCCAGCGTA  
TGGTCGATGAAATCGTGAAGTGTACGAAGAGGCTTATGCTGCTGCCGTTGAGGAATACGAAGCTAATCCACCTGCT  
GTAGCTCGTGGTAAGAAACCGCTGAAACCGTATGAGGGTGACATGCCGTTCTTTCGATAACGGTGACGGTACGACTAC  
CTTTAAGTTCAAATGCTACGCGTCTTTCCAAGACAAGAAGACCAAAGAGACCAAGCACATCAATCTGGTTGTGGTTG  
ACTCAAAGGTAAGAAGATGGAAGACGTTCCGATTATCGGTGGTGGCTCTAAGCTGAAAGTTAAATATTCTCTGGTT  
CCATACAAGTGGAACACTGCTGTAGGTGCGAGCGTTAAGCTGCAACTGGAATCCGTGATGCTGGTTCGAACTGGCTAC  
CTTTGGTGGCGGTGAAGACGATTGGGCTGACGAAGTTGAAGAGAACGGCTATGTTGCCTCTGGTTCTGCCAAAGCGA  
GCAAACCACGCGACGAAGAAAGCTGGGACGAAGACGACGAAGAGTCCGAGGAAGCAGACGAAGACGGGACTTCTAA  
GTGGAACCTGCGGGGAGAAAATCCTTGGAGCAATCAAGGTGACTTCCCTCTGGGTGTTGGGAGTGGCAGGGCGCTACGAA  
CAATAAAGGTTACGGGCAGGTGTGGTGCAGCAATACCGGAAAGGTTGTCTACTGTCTATCGCGTAATGTCTAATGCTC  
CGAAAGGTTCTACCGTCTCCTGACTCCTGTGATAATCCATTATGTTTGTAAACCCTGAACACCTATCCATAGGAACTCCA  
AAAGAGAAGTCCACTGACATGGTAAATAAGGGTGCCTCACACAAGGGGTATAAACTTTAGACGAAGACGTAATGGC  
AATCATGGAGTCCAGCGAGTCCAATGTATCCTTAGCTCGCACCTATGGTGTCTCCCAACAGACTATTTGTGATATAC  
GCAAAGGGAGGCGACATGGCAGGTTACGGCGCTAAAGGAATCCGAAAGGTTGGAGCGTTTTGCTCTGGCCTAGAGGA  
CAAGGTTTTCAAAGCAGTTGGAATCAAAAGGTATTAATTCGAGTATGAAGAGTGGAAAGTGCCTTATGTAATTCGG  
CGAGCAATCACACTTACACTCCAGACTTCTTACTTCCAAACGGTATATTTCGTTGAGACAAAGGGTCTGTGGGAAAGC  
GATGATAGAAAGAAGCACTTATTAATTAGGGAGCAGCACCCCGAGCTAGACATCCGTATTGTCTTCTCAAGCTCACG  
TACTAAGTTATACAAAGGTTCTCCAACGTCTTATGGAGAGTCTGCGAAAAGCATGGTATTAAGTTCGCTGATAAAC  
TGATACCTGCTGAGTGGATAAAGGAACCCAAGAAGGAGTCCCCTTTGATAGATTAAGAAGGAAAGGAGGAAAGAAA  
TAATGGCTCGTGTACAGTTTTAAACAACGTGAATCTACTGACGCAATCTTTGTTCACTGCTCGGCTACCAAGCCAAGT  
CAGAATGTTGGTGTCCGTGAGATTCCGAGTGGCACAAGAGCAGGGTTGGCTCGATGTGGGATACCACCTTTATCAT

CAAGCGAGACGGTACTGTGGAGGCAGGACGAGATGAGATGGCTGTAGGCTCTCACGCTAAGGGTTACAACCACAAC  
CTATCGGCGTCTGCCTTGTGGTGGTATCGACGATAAAGGTAAGTTCGACGCTAACTTTACGCCAGCCAAATGCAA  
TCCCTTCGCTCACTGCTTGTACACTGCTGGCTAAGTACGAAGGCGCTGTGCTTCGCGCCCATCATGAGGTGGCGCC  
GAAGGCTTGCCTTCGTTTCGACCTTAAGCGTTGGTGGGAGAAGAACGAAGTGGTCACTTCTGACCGTGGATAATTA  
TTGAACTCACTAAAGGGGAGACCACAGCGTTTTCCCTTTGTTTCGCATTGGAGGTCAAATAATGCGCAAGTCTTATAAA  
CAATTCTATAAGGCTCCGAGGAGGCATATCCAAGTGTGGGAGGCAGCCAATGGGCCTATACCAAAGGTTATTATAT  
AGACCACATTGACGGCAATCCACTCAACGACGCCTTAGACAATCTCCGTCTGGCTCTCCAAAAGAAAACCTCATGGA  
ACATGAAGACTCCAAAGAGCAATACCTCAGGACTAAAGGGACTGAGTTGGAGCAAGGAAAGGGAGATGTGGAGAGGC  
ACTGTAACAGCTGAGGGTAAACAGCATAACTTTTCGTAGTAGAGATCTATTGGAAGTCGTTGCGTGGATTTATAGAAC  
TAGGAGGGAATTGCATGGACAATTTCGCACGATTCCGATAGTGTATTTCTTTACCACATTCCTTGTGACAACCTGTGG  
AGTAGTGATGGGAACCTCGCTGTTCTCTGACGGACACACGTTCTGTACTGTATGCGAGAAGTGGACTGGTGGTAATGA  
AGACTAAAGAGAGGGCTTCAAACCGAAACCCCTCAGGAGGTAAACCAATGACTTACAACGTGTGGAACCTTCGGGG  
AATCCAATGGACGCTACTCCGCTTAACTGCGAGAGGAATCTCCAAGGAAACCTGTGAGAAGGCTGGCTACTGGATT  
GCCAAAGTAGACGGTGTGATGTACCAAGTGGCTGACTATCGGGACCAGAACCGCAACATTGTGAGTCAGAAGGTTTCG  
AGATAAAGATAAGAACTTTAAGACCCTGGTAGTCACAAGAGTGACGCTCTGTTTCGGGAAGCACTTGTGGAATGGTG  
GTAAGAAGATTGTGCTTACAGAAGGTGAAATCGACATGCTTACCCTGATGGAACCTTCAAGACTGTAAGTATCCTGTA  
GTGTCGTTGGGTACGGTGCCTCTGCCGCTAAGAAGACATGCGCTGCCAATACGAATACTTTGACCAGTTCGAACA  
GATTATCTTAATGTTTCGATATGGACGAAGCAGGGCGCAAAGCAGTCGAAGAGGCTGCACAGGTTCTACCTGCTGGTA  
AGGTACGAGTGGCAGTTCCTCCGTGTAAGGATGCAAACGAGTGTACCTAAATGGTACGACCGTGAATCATGGAG  
CAAGTGTGGAATGCTGGTCTTGGATTCTGATGGTGTGGTATCGGCTCTTTTCGTTACGTGAACGAATCCGTGAGCA  
CCTATCGTCCGAGGAATCAGTAGGTTTACTTTTTCAGTGGCTGCACTGGTATCAACGATAAGACCTTAGGTGCCCGTG  
GTGGTGAAGTCATTATGGTCACTTCCGGTTCGGTATGGGTAAGTCAACGTTTCGTCCTCAACAAGCTCTACAATGG  
GGCACAGCGATGGGCAAGAAGGTAGGCTTAGCGATGCTTGAGGAGTCCGTTGAGGAGACCGCTGAGGACCTTATAGG  
TCTACACAACCGTGTCCGACTGAGACAATCCGACTCACTAAAGAGAGAGATTATTGAGAACGGTAAGTTCGACCAAT  
GGTTCGATGAACTGTTTCGGCAACGATACGTTCCATCTATATGACTCATTTCGCCGAGGCTGAGACGGATAGACTGCTC  
GCTAAGCTGGCCTACATGCGCTCAGGCTTGGGCTGTGACGTAATCATTCTAGACCACATCTCAATCGTCGTATCCGC  
TTCTGGTGAATCCGATGAGCGTAAGATGATTGACAACCTGATGACCAAGCTCAAAGGGTTCGCTAAGTCAACTGGGG  
TGGTGTCTGGTCAATTTGTACCTTAAGAACCAGACAAGGTAAGCAGTCAAGGAGGTCGAGGAGGTCGCCCCGTTTCTATT  
ACTGCACTACGTGGTTCGCGCCTACGCCAATCTGATACTATTATTGCCCTTGAGCGTAATCAGCAAGGCGA  
TATGCCTAACCTTGTCTCGTATTCTCAAGTCCGCTTTACTGGTGATACTGGTATCGTGGTACATGGAAT  
ACAACAAGGAAACCGGATGGCTTGAACCATCAAGTTACTCAGGGGAAGAAGAGTCACACTCAGAGTCAACAGACTGG  
TCCAACGACACTGACTTCTGACAGGATTCTTGATGACTTTCCAGACGACTACGAGAAGTTTCGCTGGAGAGTCCCAT  
TCTAATACGACTCACTAAAGGAGACACACCATGTTCAAACCTGATTAAGAAGTTAGGCCAATGCTGGTTCGTATGTA  
CAACGTGGAAGCCAAGCGACTGAACGATGAGGCTCGTAAAGAGGGCCACACAGTCACGCGCTCTGGCGATTTCGCTCCA  
ACGAACCTGGCTGACAGTGCATCCACTAAAGTTACCGAGGCTGCCCGTGTGGCAAACCAAGCTCAACAGCTTTCCAAA  
TTCTTTGAGTAATCAAACAGGAGAAACCATTATGTCTAACGTAGCTGAAACTATCCGTCTATCCGATACAGCTGACC  
AGTGAACCGTTCGAGTCCACATCAACGTTTCGCAACGGTAAGGCGACTATGGTTTACCGCTGGAAGGACTCTAAGTCC  
TCTAAGAATCACACTCAGCGTATGACGTTGACAGATGAGCAAGCACTGCGTCTGGTCAATGCGCTTACCAAAGCTGC  
CGTGACAGCAATTCATGAAGCTGGTTCGCGTCAATGAAGCTATGGCTATCCTCGACAAGATTGATAACTAAGAGTGGT  
ATCCTCAAGGTCGCCAAAGTGGTGGCCTTCATGAATACTATTTCGACTCACTATAGGAGATATTACCATGCGTGACCC  
TAAAGTTATCCAAGCAGAAATCGCTAAACTGGAAGCTGAACTGGAGGACGTTAAGTACCATGAAGCTAAGACTCGCT  
CCGCTGTTACATCTTGAAGAACTTAGGCTGGACTTGGACAAGACAGACTGGCTGGAAGAAACCGAAGTTACCAAG  
CTGAGTCATAAGGTGTTTCGATAAGGACACTATGACCCACATCAAGGCTGGTGGATTGGGTTAAGGTTGACATGGGAGT  
TGTTGGTGGATACGGCTACGTCGCTCAGTTAGTGGCAAATATGCACAAGTGTACATACATCACAGGTGTTACTCCAC  
GCGGTGCAATCGTTGCCGATAAGACCAACATGATTACACAGGTTTCTTGACAGTTGTTTCATATGAAGAGATTGTT  
AAGTCACGATAATCAATAGGAGAAATCAATATGATCGTTTCTGACATCGAAGCTAACGCCCTCTTAGAGAGCGTCCAC  
TAAGTTCCTACTGCGGGTTATCTACGACTACTCCACCGCTGAGTACGTAAGCTACCGTCCGAGTACTTCGGTGCCT  
ATCTGGATGCGCTGGAAGCCGAGGTTGCACGAGGCGGCTTATTGTGTTCCACAACGGTCAAGTATGACGTTCTCT  
GCATTGACCAAACCTGGCAAAGTTGCAATTGAACCGAGAGTTCCACCTTCTCGTGAGAAGTATTGACACCCTTGT  
GTTGTCACGTTTGTATTCACTTCAACCTCAAGGACACCGATATGGGTCTTCTGCGTTCGGGCAAGTTGCCCGGAAAC  
GCTTTGGGTCTCACGCTTTGGAGGCGTGGGGTTATCGCTTAGGCGAGATGAAGGGTGAATACAAAGACGACTTTAAG  
CGTATGCTTGAAGAGCAGGGTGAAGAATACGTTGACGGAATGGAGTGGTGGAACTTCAACGAAGAGATGATGGACTA  
TAACGTTTCAGGACGTTGTGGTAACTAAAGCTCTCCTTGAAGACTACTCTCTGACAAACATTACTTCCCTCCTGAGA  
TTGACTTTACGGACGTAGGATACACTACGTTCTGGTTCAGAATCCCTTGAAGGCGTTGACATTGAACATCGTGCTGCA  
TGGCTGCTCGCTAAACAAGAGCGCAACGGGTTCCCGTTTTCGACAAAAGCAATCGAAGAGTTGTACGTAGAGTTAGC  
TGCTCGCCGCTCTGAGTTGCTCCGTAATTTGACCGAAACGTTTCGGCTCGTGGTATCAGCCTAAAGGTGGCACTGAGA  
TGTTCTGCCATCCGCGAACAGGTAAGCCACTACCTAAATACCCTCGCATTAAAGACACCTAAAGTTGGTGGTATCTTT

AAGAAGCCTAAGAACAAGGCACAGCGAGAAGGCCGTGAGCCTTGCGAACTTGATAACCCGCGAGTACGTTGCTGGTGCTC  
TCCTTACACCCCAGTTGAACATGTTGTGTTAAACCCCTTCGTCTCGTGACCACATTCAGAAGAACTCCAAGAGGCTG  
GGTGGGTCCCAGCAAGTACACCGATAAGGGTGTCTCTGTGGTGGACGATGAGGTACTCGAAGGAGTACGTGTAGAT  
GACCCTGAGAAGCAAGCCGCTATCGACCTCATTAAAGAGTACTTGATGATTGAGAAGCGAATCGGACAGTCTGCTGA  
GGGAGACAAAGCATGGCTTCGTTATGTTGCTGAGGATGGTAAGATTTCATGGTTCTGTAAACCCTAATGGAGCAGTTA  
CGGGTGTGCGACCCATGCGTTCCTCAAACCTTGCGCAAATTCGGGTGTACGTTCTCCTTATGGAGAGCAGTGTGCG  
GCTGCTTTTGGCGCTGAGCACCATTTGGATGGGATAACTGGTAAGCCTTGGGTTCAGGCTGGCATCGACGCATCCGG  
TCTTGAGCTACGCTGCTTGGCTCACTTCATGGCTCGCTTTGATAACGGCGAGTACGCTCACGAGATTCTTAACGGCG  
ACATCCACACTAAGAACCAGATAGCTGCTGAACTACCTACCCGAGATAACGCTAAGACGTTTCATCTATGGGTTCCCTC  
TATGGTGTGGTGTATGAGAAGATTGGACAGATTGTTGGTGTGGTAAAGAGCGCGGTAAGGAATCAAGAAGAAAT  
CCTTGAGAACACCCCGCGATTGCAGCACTCCGCGAGTCTATCCAACAGACACTTGTGAGTCTCAATGGGTAG  
CTGGTGTAGCAACAAGTCAAGTGGAAACGCCGCTGGATTAAAGGTTGATGGTGTGTAAGGTACACGTTTCGTAGTCTC  
CACGCTGCCTTGAATACCCTACTGCAATCTGCTGGTGTCTCATCTGCAAACCTGTGGATTATCAAGACCGAAGAGAT  
GCTCGTAGAGAAAGGCTTGAAGCATGGCTGGGATGGGGACTTTGCGTACATGGCATGGGTACATGATGAAATCCAAG  
TAGGCTGCCGTACCGAAGAGATTGCTCAGGTGGTCATTGAGACCGCACAAAGAAGCGATGCGCTGGGTGGAGACCAC  
TGGAACCTCCGGTGTCTTCTGGATAACCGAAGGTAAGATGGGTCTAATTGGGCGATTTGCCACTGATACAGGAGGCT  
ACTCATGAACGAAAGACACTTAACAGGTGCTGCTTCTGAAATGCTAGTAGCCTACAAATTTACCAAAGCTGGGTACA  
CTGTCTATTACCCTATGCTGACTCAGAGTAAAGAGGACTTGGTTGTATGTAAGGATGGTAAATTTAGTAAGGTTTCAG  
GTTAAAACAGCCACAACGGTTCAAACCAACACAGGAGATGCCAAGCAGGTTAGGCTAGGTGGATGCGGTAGGTCCGA  
ATATAAGGATGGAGACTTTGACATTTCTGCGGTTGTGGTTGACGAAGATGTGCTTATTTTTCACATGGGACGAAGTAA  
AAGGTAAGACATCCATGTGTGTGCGCAAGAGAAACAAAGGCATAAAACTATAGGAGAAATTTATTATGGCTATGACAA  
AGAAATTTAAAGTGTCTTTCGACGTTACCGCAAAGATGTGCTGCTGACGTTACGGCAATCTTAGAGAAAGATATGCTG  
CATCTATGTAAGCAGGTCCGGCTCAGGTGCGATTGTCCCAATGGTAAACAGAAGGAAATGATTGTCCAGTTCCCTGAC  
ACACGGTATGGAAGGATTGATGACATTCGTAGTACGTACATCATTTCGTGAGGGCCATTAAGGACATGCACGAAGAGT  
ATGCAGATAAGGACTCTTTCAAACAATCTCCTGCAACAGTACGGGAGGTGTTCTGATGTCTGACTACCTGAAAGTGC  
TGCAAGCAATCAAAAGTTGCCCTAAGACTTTCCAGTCCAACATATGTACGGAACAATGCGAGCCTCGTAGCGGAGGCC  
GCTTCCCGTGGTCACATCTCGTGCCTGACTACTAGTGGACGTAACGGTGGCGCTTGGGAAATCACTGCTTCCGGTAC  
TCGCTTTCTGAAACGAATGGGAGGATGTGTCTAATGTCTCGTACCTTGTGACTATTCCACGCGATGTGTGGAACGA  
TATACAGGGCTACATCGACTCTCTGGAACGTGAGAACGATAGCCTTAAGAATCAACTAATGGAAGCTGACGAATACG  
TAGCGGAAGTGTAGGAGAAACTTAATGGCACTTCTTACCTTAAACAATTTCTATGAGTTACGTGAAGGCTGCGACGA  
CAAGGGTATCCTTGTGATGGACGGCGACTGGCTGGTCTTCCAAGCTATGAGTGCTGCTGAGTTTGTATGCCTCTTGGG  
AGGAAGAGATTTGGCACCGATGCTGTGACCACGCTAAGGCCCGTACAGATTCTTGAGGATTCCATTAAGTCCCTACGAG  
ACCCGTAAGAAGGCTTGGGCAGGTGCTCCAATTGTCCTTGCCTTACCGATAGTGTTAACTGGCGTAAAGAAGTGGT  
TGACCCGAAGTATAAGGCTAACCCTAAGGCCGTGAAGAAACCTGTAGGGTACTTTGAGTTCCTTGTATGCTCTCTTTG  
AGCGCGAAGAGTTCTATTGCATCCGTGAGCCTATGCTTGGGGTGTATGACGTTATGGGAGTTATTGCTTCCAATCCG  
TCTGCCTTCGGTGTCTGTAAGGCTGTAATCATCTCTTTCGATAAGGACTTTAAGACCATCCCTAACTGTGACTTCT  
GTGGTGTACCCTGGTAACATCCTGACTCAGACCGAAGAGTCCGCTGACTGGTGGCACCTCTTCCAGACCATCAAGG  
GTGACATCACTGATGGTTACTCAGGGATTGCTGGATGGGGTGATAACCGCCGAGGACTTCTTGAATAACCCGTTTATA  
ACCGAGCCTAAAACGTCTGTGCTTAAAGTCCGGTAAGAACAAGGCCAAGAGGTTACTAAATGGGTAAACCGCAGCC  
TGAGCCTCATGAGACGCTTTGGGACTGCATTAAGTCCATTGGCGCAAGGCTGGTATGACCGAAGAGGATATTATCA  
AGCAGGGCCAAATGGCTCGAATCCTACGGTTCAACGAGTACAACCTTTATTGACAAGGAGATTTACCTGTGGAGACCG  
TAGCGTATATTGGTCTGGGTCTTTGTGTTCTCGGAGTGTGCCTCATTTCGTGGGGCCTTTGGGACTTAGCCAGAATA  
ATCAAGTCTTACACGACACTAAGTGATAAACTCAAGGTCCCTAAATTAATACGACTCACTATAGGGAGATAGGGGC  
CTTTACGATTATTACTTTAAGATTTAACTCTAAGAGGAATCTTTATTATGTTAACACCTATTAACCAATTACTTAAG  
AACCCTAACGATATTCCAGATGTACCTCGTGCAACCCTGAGTATCTACAGGTTTCGATTCAACTATGCGTACCTCGA  
AGCGTCTGGTCCATATAGGACTTATGCGTGTCTAATGGTGTAGTGGGCCCACATCTTGGGTTTTCATTACGGCCCTAC  
AGTATGCCTCTAACGTCATTGACGAGATTGAGTTACGCAAGGAACAACATAAGAGATGATGGGGAGGATTGACACTAT  
GTGTTTCTCACCGAAAATTTAAACTCCGAAGATGGATAACCAATCAGATTTCGAGCCGTTGAGCCAGCGCCTCTGACCC  
AAGAAGTGTCAAGCGTGGAGTTCGGTGGGTCTTCTGATGAGACGGATAACCGAGGGCACCGAAGTGTCTGGACGCAAA  
GGCCTCAAGGTGCAACGTGATGATTCCGTAGCGAAGTCTAAAGCCAGCGGCAATGGCTCCGCTCGTATGAAATCTTC  
CATCCGTAAGTCCGCATTTGGAGGTAAGAAGTGTATGCTGAGTTCACATGTGTGGAGGCTAAGAGTCGCTTCCGTGC  
AATCCGGTGGACTGTGGAACACCTTGGGTGCTTAAAGGATTTCGAAGGACACTTTGTGGGCTACAGCCTCTACGTAG  
ACGAAGTGTGACATGTCTGGTTGCCGTGAAGAGTACATTCTGGACTCTACCGGAAAACATGTAGCGTACTTCCGCG  
TGGTGTGTAAGCTGTGACATTACCACAAAGGAGACATTCTGGATGTAACGTCGGTTGTCTAATCCTGAGGCAGA  
CTCTAAGGGCTTACAGCGATTCTAGCGAAACGCTTTAAGTACCTTGCGGAACCTCCAGATTGCGATTGGGTGTCTC  
GTTGTAAGCATGAAGGCGAGACAATGCGTGTATACTTTAAGGAGGTATAAGTTATGGGTAAGAAGTTAAGAAGGCC  
GTGAAGAAGTACCAAGTCCGTTAAGAAAGTCGTTAAGGAAGGGGCTCGTCCGGTTAAACAGGTTGCTGGCGGTCT

AGCTGGTCTGGCTGGTGGTACTGGTGAAGCACAGATGGTGGAAAGTACCACAAGCTGCCGCACAGATTGTTGACGTAC  
CTGAGAAAGAGGTTTTCCACTGAGGACGAAGCACAGACAGAAAGCGGACGCAAGAAAGCTCGTGCTGGCGGTAAGAAA  
TCCTTGAGTGTAGCCCGTAGCTCCGGTGGCGGTATCAACATTTAATCAGGAGGTTATCGTGGAAGACTGCATTGAAT  
GGACCGGAGGTGTCAACTCTAAGGGTTATGGTCGTAAGTGGGTTAATGGTAAACTTGTGACTCCACATAGGCACATC  
TATGAGGAGACATATGGTCCAGTTCCAAACAGGAATTGTGGTGATGCATATCTGCGATAACCCTAGGTGCTATAACAT  
AAAGCACCTTACGCTTGGAACTCCAAAGGATAATTCCGAGGACATGGTTACCAAAGGTAGACAGGCTAAAGGAGAGG  
AACTAAGCAAGAACTTACAGAGTCAGACGTTCTCGCTATACGCTCTTCAACCTTAAGCCACCGCTCCTTAGGAGAA  
CTGTATGGAGTCAGTCAATCAACCATAACGCGAATACTACAGCGTAAGACATGGAGACACATTTAATGGCTGAGAAA  
CGAACAGGACTTGCGGAGGATGGCGCAAAGTCTGTCTATGAGCGTTTTAAAGAACGACCGTGCTCCCTATGAGACACG  
CGCTCAGAATTGCGCTCAATATACCATCCCATTGTTCCCTAAGGACTCCGATAACGCCTCTACAGATTATCAAA  
CTCCGTGGCAAGCCGTGGCGCTCGTGGTCTGAACAATCTAGCCTTAAGCTCATGTGGCTCTATTCCCTATGCAG  
ACTTGGATGCGACTTACTATATCTGAATATGAAGCAAAGCAGTTACTGAGCGACCCCGATGGACTCGTAAGGTGCA  
TGAGGGCCTCTCGATGGTAGAGCGTATCATCATGAACTACATTGAGTCTAACAGTTACCGCGTGACTCTCTTTGAGG  
CTCTCAAACAGTTAGTCGTAGCTGGTAACGTCCTGCTGTACCTACCGGAACCGGAAGGGTCAAACCTATAATCCCATG  
AAGCTGTACCGATTGTCTTCTTATGTGGTCCAACGAGACGCATTCCGGCAACGTTCTGCAAATGGTGACTCGTGACCA  
GATAGCTTTTGGTGCTCTCCCTGAGGACATCCGTAAGGCTGTAGAAGGTCAAGGTGGTGAGAAGAAAGCTGATGAGA  
CAATCGACGTGTACACTCACATCTATCTGGATGAGGACTCAGGTGAATACCTCCGATACGAAGAGGTGAGGGTATG  
GAAGTCCAAGGCTCCGATGGGACTTATCCTAAAGAGGCTTGCCCATACATCCCGATTCCGATGGTCAGACTAGATGG  
TGAATCCTACGGTCTTTCGTACATTGAGGAATACTTAGGTGACTTACGGTCCCTTGAAAATCTCCAAGAGGCTATCG  
TCAAGATGTCCATGATTAGCTCTAAGGTTATCGGCTTAGTGAATCCTGCTGGTATCACCCAGCCACGCCGACTGACC  
AAAGCTCAGACTGGTGACTTCGTTACTGGTCGTCCAGAAGACATCTCGTTCCTCCAACCTGGAGAAGCAAGCAGACTT  
TACTGTAGCTAAAGCCGTAAGTGACGCTATCGAGGCTCGCCTTTTCGTTTGCCTTTATGTTGAACTCTGCGGTTCCAGC  
GTACAGGTGAACGTGTGACCCGCCGAAGAGATTCGGTATGTAGCTTCTGAACTTGAAGATACTTTAGGTGGTGTCTAC  
TCTATCCTTTCTCAAGAATTACAATTGCCTCTGGTACGAGTGCTCTTGAAGCAACTACAAGCCACGCAACAGATTCC  
TGAGTTACCTAAGGAAGCCGTAGAGCCAACCATTAGTACAGGTCTGGAAGCAATTGGTCGAGGACAAGACCTTGATA  
AGCTGGAGCGGTGTGTCACTGCGTGGGCTGCACTGGCACCTATGCGGGACGACCCTGATATTAACCTTGCGATGATT  
AAGTTACGTATTGCCAACGCTATCGGTATTGACACTTCTGGTATTCTACTCACCGAAGAACAGAAGCAACAGAAGAT  
GGCCCAACAGTCTATGCAAATGGGTATGGATAATGGTGTCTGCTGCGCTCAAGGTATGGCTGCACAAGTACAG  
CTTACCTGAGGCTATGGCTGCTGCCGCTGATTCCGTAAGTTTACAGCCGGGAATTTAATACGACTCACTACTAGGGA  
GACCTCATCTTTGAAATGAGCGATGACAAGAGGTTGGAGTCTCGGCTTCTCCTGTAGTTCAACTTTAAGGAGACAAT  
AATAATGGCTGAATCTAATGCAGACGTATATGCATCTTTTGGCGTGAACCTCCGCTGTGATGTCTGGTGGTTCCGTTG  
AGGAACATGAGCAGAACATGCTGGCTCTTGATGTTGCTGCCCGTGATGGCGATGATGCAATCGAGTTAGCGTCAGAC  
GAAGTGGAAACAGAACGTGACCTGTATGACAACCTCTGACCCGTTCCGGTCAAGAGGATGACGAAGGCCGATTCCAGGT  
TCGTATCGGTGATGGCTCTGAGCCGACCGATGTGGACACTGGAGAAGAAGGCGTTGAGGGCACCGAAGGTTCCGAAG  
AGTTTACCCCACTGGGCGAGACTCCAGAAGAAGTGGTAGCTGCCTCTGAGCAACTTGGTGAGCACGAAGAGGGCTTC  
CAAGAGATGATTAACATTGCTGCTGAGCGTGGCATGAGTGTGAGACCAATTGAGGCTATCCAGCGTGAGTACGAGGA  
GAACGAAGAGTTGTCCGCCGAGTCTACGCTAAGCTGGCTGAAATTTGGCTACACGAAGGCTTTTCATTGACTCGTATA  
TCCGTGGTCAAGAAGCTCTGGTGGAGCAGTACGTAACAGTGTGATTGAGTACGCTGGTGGTCTGTAACGTTTTGAT  
GCACTGTATAACCACCTTGAGACGCACAACCCTGAGGCTGCACAGTCTGGATAATGCGTTGACCAATCGTGACTT  
AGCGACCGTTAAGGCTATCATCAACTTGGCTGGTGGTCTCGCGCTAAGGCGTTCCGGTCGTAAGCCAACCTCGTAGTG  
TGACTAATCGTGCTATTCCGGCTAAACCTCAGGCTACCAAGCGTGAAGGCTTTGCGGACCGTAGCGAGATGATTA  
GCTATGAGTGACCCTCGGTATCGCACAGATGCCAACTATCGTCTGCAAGTCAAGCAGAAAGTAATCGATTCCGAACCT  
CTGATAGACTTCGAAATTAATACGACTCACTATAGGGAGACCACAACGGTTTTCCCCCTAGAAATAATTTTGTTTAAC  
TTTAAAGAAGGAGATATACATATGGCTAGCATGACTGGTGGACAGCAAATGGGTACTAACCAAGGTAAAGGTGTAGTT  
GCTGCTGGAGATAAACTGGCGTTGTTCTTGAAGGTATTTGGCGGTGAAGTCTGACTGCGTTCGCTCGTACCTCCGT  
GACCATTCTCGCCACATGGTACGTTCCATCTCCAGCGGTAATCCGCTCAGTTCCTGTTCTGGTTCGACTCAGG  
CAGCGTATCTGGCTCCGGGCGAGAACCCTCGACGATAAACGTAAGGACATCAAACACACCAGAGAAGGTAATCACCATT  
GACGGTCTCCTGACGGCTGACGTTCTGATTTATGATATTGAGGACGCGATGAACCACTACGACGTTCTGCTCTGAGTA  
TACCTCTCAGTTGGGTGAATCTCTGGCGATGGCTGCGGATGGTGGCGTTCTGGCTGAGATTGCCGGTCTGTGTAACG  
TGGAAAGCAAATATAATGAGAACATCGAGGGCTTAGGTACTGCTACCGTAATTGAGACCACTCAGAACAAGGCCGCA  
CTTACCGACCAAGTTGCGCTGGGTAAGGAGATTATTGCGGCTCTGACTAAGGCTCGTGCGGCTCTGACCAAGAATA  
TGTTCCGGCTGCTGACCGTGTGTTCTACTGTGACCCAGATAGCTACTCTGCGATTCTGGCAGCACTGATGCCGAACG  
CAGCAAACCTACGCTGCTCTGATTGACCCTGAGAAGGGTTCTATCCGCAACGTTATGGGCTTTGAGGTTGTAGAAGTT  
CCGCACCTCACCGCTGGTGGTGTGGTACCCTCGTGAGGGCACTACTGGTCAGAAGCACGTCTTCCCTGCCAATAA  
AGGTGAGGGTAATGTCAAGGTTGCTAAGGACAACGTTATCGGCCTGTTTCATGCACCGCTCTGCGGTAGGTACTGTTA  
AGCTGCGTGACTTGGCTCTGGAGCGCGCTCGCCGTGCTAACTTCCAAGCGGACCAGATTATCGCTAAGTACGCAATG  
GGCCACGGTGGTCTTCCGCCAGAAGCTGCAGGAGCTGTGCTATTCCAGTCAGGTGTGATGCTCGGGGATCCGAATTC

GAGCTCCGTCTAATACGACTCACTATAGCTAAACATTAATCATTTAAAATAAGGAGGTAAAGCATGAAATATCTTCT  
GCCTACGGCTGCCACGGGTTTTGTTACTGCTTGACGCTCAGCCAGCGGTCGCCATGGTATTACACTGGAGGATTTTTG  
TCGGTGACTGGCGCCAGACTGCTGGATATAATCTTGATCAAGTGCTGGAGCAAGGAGGCGTCTCAAGCCTTTTCCAG  
AATTTAGGTGTTAGCGTCACACCGATTCAACGTATCGTGCTGAGTGGGGAGAACGGCTTAAAAATCGACATCCACGT  
CATCATTCCATATGAAGGGTTGTCAGGGGATCAGATGGGTGAGATTGAAAAGATTTTTAAGGTTGTCTACCCAGTAG  
ACGACCATCACTTCAAGGTTATTTTACACTACGGTACATTAGTAATTGACGGCGTGACTCCTAACATGATTGACTAT  
TTTGGACGCCCCGATGAGGGGATTGCAGTGTTCGACGGCAAGAAGATCACAGTTACGGGGACTCTGTGGAATGGGAA  
TAAAATTATCGACGAGCGTCTGATTAACCCCGATGGCTCTCTGTTGTTCCGTGTCACTATTAACGGTGTACAGGGCT  
GGCGCCTTTGTGAACGCATTTTAGCAGGCTCGAGCGGCCCTACGTGAGTCCGGCCGGTTGCCAAGTTTTATGGGGG  
GTCAACAGTGGAAACACAGGCTTTACGGCGAACGTTACTGTCAAGAACAACAAGCTCCGCTCCTGTGGATGGTTGGAC  
ACTGACCTTTTTCTTTCCCTCAGGTGACCAAGTGACACAGGCGTGGAGTTCTACGGTTACACAATCTGGTTCTGCTG  
TTACTGTCCGTAACCGCCCTGGAATGGAAGCATCCCAGCGGGCGGGACCGCACAGTTTGGCTTCAATGGCTCTCAT  
ACAGGGACAAACGCAGCACCAACAGCATTTTTCTTGAATGGAACCCCTTGCACTGTTCGGATAAGCTTGCAGCCGCAC  
TCGAGTAAGTACTGTTAACCCCTTGGGGCCTCTAAACGGGTCTTGAGGGGTTTTTTGCTGAAAGGAGGAACTATATGCG  
CTCATACGATATGAACGTTGAGACTGCCGCTGAGTTATCAGCTGTGAACGACATTCTGGCGTCTATCGGTGAACCTC  
CGGTATCAACGCTGGAAGGTGACGCTAACGCAGATGCAGCGAACGCTCGGCGTATTCTCAACAAGATTAACCGACAG  
ATTCAATCTCGTGGATGGACGTTCAACATTGAGGAAGGCATAACGCTACTACCTGATGTTTACTCCAACCTGATTGT  
ATACAGTGACGACTATTTATCCCTAATGTCTACTTCCGGTCAATCCATCTACGTTAACCGAGGTGGCTATGTGTATG  
ACCGAACGAGTCAATCAGACCGCTTTGACTCTGGTATTACTGTGAACATTATTCTGCTCCGCGACTACGATGAGATG  
CCTGAGTGCTTCCGTTACTGGATTGTCACCAAGGCTTCCCGTCAGTTCAACAACCGATTCTTTGGGGCACCAGGAGT  
AGAGGGTGTACTCCAAGAAGAGGAAGATGAGGCTAGACGTCTCTGCATGGAGTATGAGATGGACTACGGTGGGTACA  
ATATGCTGGATGGAGATGCGTTCACCTTCTGGTCTACTGACTCGCTAACATTAATAAATAAGGAGGCTCTAATGGCAC  
TCATTAGCCAATCAATCAAGAACTTGAAGGGTGGTATCAGCCAACAGCCTGACATCCTTCGTTATCCAGACCAAGGG  
TCACGCCAAGTTAACGGTTGGTCTTCCGAGACCGAGGGCCTCCAAAAGCGTCCACCTCTTGTTTTTCTTAAATACACT  
TGGAGACAACGGTGCCTTAGGTCAAGCTCCGTACATCCACCTGATTAACCGAGATGAGCACGAACAGTATTACGCTG  
TGTTCACTGGTAGCGGAATCCGAGTGTTCGACCTTTCTGGTAACGAGAAGCAAGTTAGGTATCCTAACGGTTCCAAC  
TACATCAAGACCGCTAATCCACGTAACGACCTGCGAATGGTTACTGTAGCAGACTATACGTTTCATCGTTAACCGTAA  
CGTTGTTGCGAGAAGAACAACAAGTCTGTCAACTTACCGAATTACAACCTAATCAAGACGGATTGATTAACGTTTC  
GTGGTGGTCAGTATGGTAGGGAATAATTGTACACATTAACGGTAAAGACGTTGCGAAGTATAAGATAACCGATGGT  
AGTCAACCTGAACACGTAACAATAACGGATGCCAATGGTTAGCTGAAGAGTTAGCCAAGCAGATGCGCACTAAGT  
GTCTGATTGGACTGTAATGTAGGGCAAGGGTTCATCCATGTGACCGCACCTAGTGGTCAACAGATTGACTCCTTCA  
CGACTAAAGATGGCTACGCAGACAGTTGATTAACCCCTGTGACCCACTACGCTCAGTCTGTTCTCTAAGCTGCCACCT  
AATGCTCCTAACGGCTACATGGTGAAAATCGTAGGGGACGCCTCTAAGTCTGCCGACCAGTATTACGTTCCGGTATGA  
CGCTGAGCGGAAAGTTTGGACTGAGACTTTAGGTTGGAACACTGAGGACCAAGTTCTATGGGAAACCATGCCACACG  
CTCTTGTGCGAGCCGCTGACGGTAATTTGACTTCAAGTGGCTTGAGTGGTCTCCTAAGTCTTGTGGTACGTTGAC  
ACCAACCCCTTGGCCTTCTTTTGTGGTTCAAGTATTAACGATGTGTTCTTCTCCGTAACCGCTTAGGATTCTTAG  
TGGGGAGAACATCATATTGAGTCGTACAGCCAAATACTTCAACTTCTACCCTGCGTCCATTGCGAACCTTAGTGATG  
ACGACCCTATAGACGTAGCTGTGAGTACCAACCGAATAGCAATCCTTAAGTACGCCGTTCCGTTCTCAGAAGAGTTA  
CTCATCTGGTCCGATGAAGCACAAATTCGTCTGACTGCCTCGGGTACTCTCACATCTAAGTCCGTTGAGTTGAACCT  
AACGACCCAGTTTACGTAACAGGACCGAGCGAGACCTTTTGGGATTGGGCGTAATGTCTACTTTGCTAGTCCGAGGT  
CCAGCTTACGTCATCCACAGGTAACGCTGTGCAGGATGTGAGTCCGTTAAGAATGCTGAGGACATTACATCA  
CACGTTCCCTAACTACATCCCTAATGGTGTGTTGAGTATTTGCGGAAGTGGTACGGAAAACCTTCTGTTCCGGTACTATC  
TCACGGGGACCCTAGTAAAATCTTCATGTACAAATTCCTGTACCTGAACGAAGAGTTAAGGCAACAGTCGTGGTCTC  
ATTGGGACTTTGGGGAAAACGTACAGGTTCTAGCTTGTGAGATATCAGCTCAGATATGTATGTGATTCTTCCGAAT  
GAGTTCAATACGTTCCCTAGCTAGAATCTCTTCACTAAGAACGCCATTGACTTACAGGGAGAACCCTATCGTGCCTT  
TATGGACATGAAGATTCGATACACGATTCCCTAGTGGAAACATAACAAGATGACACATTCACCTACTATTATCATATTC  
CAACAATTTATGGTGCAAACCTTCCGGAGGGGCAAAATCACTGTATTGGAGCCTGATGGTAAGATAACCCGTGTTTGG  
CAACCTACGGCTGGGTGGAATAGCGACCCCTTGGCTGAGACTCAGCGGTAACCTGGAGGGACGCATGGTGTACATTGG  
GTTCAACATTAACCTCGTATATGAGTTCTCTAAGTTCCTCATCAAGCAGACTGCCGACGACGGGTCTACCTCCACGG  
AAGACATTGGGCGCTTACAGTTACGCCGAGCGTGGGTTAACTACGAGAACTCTGGTACGTTTGCATTTATGTTGAG  
AACCAATCGTCTAACTGGAAGTACACAATGGCTGGTGCCCGATTAGGCTCTAACACTCTGAGGGCTGGGAGACTGAA  
CTTAGGGACCGGACAATATCGATTCCCTGTGGTTGGTAACGCCAAGTTCAACACTGTATACATCTTGTGAGATGAGA  
CTACCCCTCTGAACATCATTGGGTGTGGCTGGGAAGGTAACACTTACGGAGAAGTTCCGGTATTTAATTAATATTT  
CTCCCTGTGGTGGCTCGAAATTAATACGACTCACTATAGGGAGAACAATACGACTACGGGAGGGTTTTCTTATGATG  
ACTATAAGACCTACTAAAAGTACAGACTTTGAGGTATTCACTCCGGCTCACCATGACATTCTTGAAGCTAAGGCTGC  
TGGTATTGAGCCGAGTTTTCCCTGATGCTTCCGAGTGTGTACGTTGAGCCTCTATGGGTTCCCTCTAGCTATCGGTG  
GTAACCTGCGGGGACCAGTGTGTTTGGTTACGAGCGACCAAGTGTGGCGACTTAGTGGAAGGCTAAGCGAAAGTTC

CGTAAGTTAATCATGGAGTATCGCGATAAGATGCTTGAGAAGTATGATACTCTTTGGAATTACGTATGGGTAGGCAA  
TACGTCCCACATTTCGTTTCTCAAGACTATCGGTGCGGTATTCCATGAAGAGTACACACGAGATGGTCAATTTTCAGT  
TATTTACAATCACGAAAGGAGGATAACCATATGTGTTGGGCAGCCGCAATACCTATCGCTATATCTGGCGCTCAGGC  
TATCAGTGGTTCAGAACGCTCAGGCCAAAATGATTGCCGCTCAGACCCGCTGCTGGTTCGTCGTCGAAGCTATGGAAATCA  
TGAGGCAGACGAACATCCAGAATGCTGACCTATCGTTGCAAGCTCGAAGTAAACTTGAGGAAGCGTCCGCCGAGTTG  
ACCTCACAGAACATGCAGAAGGTCCAAGCTATTGGGTCTATCCGAGCGGCTATCGGAGAGAGTATGCTTGAAGGTTT  
CTCAATGGACCGCATTAAGCGAGTACAGAAGGACAGTTTCATTCCGGGAAGCCAATATGGTAACTGAGAACTATCGCC  
GTGACTACCAAGCAATCTTCGCACAGCAACTTGGTGGTACTCAAAGTGTGCAAGTCAGATTGACGAAATCTATAAG  
AGCGAACAGAAACAGAAGAGTAAGCTACAGATGGTTCTGGACCCACTGGCTATCATGGGGTCTTCCGCTGCGAGTGC  
TTACGCATCCGGTGCCTTCCACTTAAGTCCACAACATAAGGCACCTATTGTTGCCGCTAAAGGAACCAAGACGGGGA  
GGTAATGAGCTATGAGTAAAATCTGCCCTTCAAGCGGCACAACCCGGGACTCTCTCGGTTACGTGGTGGTGGTCT  
GGAGGTATGGGCTATCGTCAGCAACCACTCAGGCCGAACAGCCAAGGTCAAGCCTATTGGACACCATTGGTTCGGTT  
CGCTAAGGCTGGTGCCGATATGTATACCGCTAAGGAACAACGAGCACGAGACCTAGCTGATGAACGCTCTAACGAGA  
TTATCCGTAAGCTGACCCCTGAGCAACGTCGAGAAGCTCTCAACAACGGGACCCCTTCTGTATCAGGATGACCCATAC  
GCTATGGAAGCACTCCGAGTCAAGACTGGTCGTAACGCTGCGTATCTTGTGGACGATGACGTTATGCAGAAGATAAA  
AGAGGGTGTCTTCCGTAAGACTCGCGAAGAGATGGAAGAGTATCGCCATAGTCGCCTTCAAGAGGGCGCTAAGGTATACG  
CTGAGCAGTTCGGCATCGACCCTGAGGACGTTGATTATCAGCGTGGTTTCAACGGGGACATTACCGAGCGTAACATC  
TCGCTGTATGGTGCATGATAACTTCTTGGCCAGCAAGCTCAGAAGGGCGCTATCATGAACAGCCGAGTGGAACT  
CAACGGTGTCTTCAAGACCCTGATATGCTGCGTCCGACTCTGCTGACTTCTTTGAGAAGTATATCGACAACG  
GTCTGGTTACTGGCGCAATCCCATCTGATGCTCAAGCCACACAGCTTATAAGCCAAGCGTTTCAGTGACGCTTCTAGC  
CGTGCTGGTGGTGTGACTTCTGATGCGAGTCCGGTGAACAAGGTAACACTTAACGGAGCCACTACGACTTACCG  
AGAGTTGATTGGTGAGGAACAGTGAACGCTCTCATGGTCACAGCACAACTTCTCAGTTTGAGACTGACGCGAAGC  
TGAACGAGCAGTATCGCTTGAAGATTAACCTCTGCGCTGAACCAAGAGGACCCCAAGGACAGCTTGGGAGATGCTTCAA  
GGTATCAAGGCTGAAGTAGATAAGGTCCAACCTGATGAGCAGATGACACCACAACGTCAGTGGCTAATCTCCGCACA  
GGAACAAGTTCAGAATCAGATGAACGCATGGACGAAAGCTCAGGCCAAGGCTCTGGACGATTCCATGAAGTCAATGA  
ACAACTTGACGTAATCGACAAGCAATCCAGAAGCGAATCAACGGTGAAGTGGGTCTCAACGGATTTTAAAGGATATG  
CCAGTCAACGAGAACACTGGTGAGTTCAAGCATAGCGATATGGTTAACTACGCCAATAAGAAGCTCGCTGAGATTGA  
CAGTATGGACATTCCAGACGGTGCCAAGGATGCTATGAAGTTGAAGTACCTTCAAGCGGACTTCAAGGACGGAGCAT  
TCCGTACAGCCATCGAACCATGGTCACTGACGCTGGTCAAGAGTGGTCTGCCGCTGTGATTAACGGTAAAGTTACCA  
GAACGAACCCAGCTATGGATGCTCTGCGCAGAATCCGCAATGCTGACCCTCAGTTGATTGTGCGCTATACCCAGA  
CCAAGCTGAGCTATTCCTGACGATGGACATGATGGACAAGCAGGGTATTGACCCTCAGGTTATTCTTGATGCCGACC  
GACTGACTGTTAAGCGGTCCAAAGAGCAACGCTTTGAGGATGATAAAGCATTTCGAGTCTGCACTGAATGCATCTAAG  
GCTCCTGAGATTGCCCGTATGCCAGCGTCACTGCGCGAATCTGCACGTAAGATTTATGACTCCGTTAAGTATCGCTC  
GGGGAACGAAAGCATGGCTATGGAGCAGATGACCAAGTTTCTTAAAGGAATCTACCTACACGTTCACTGGTGTATGATG  
TTGACGGTGATACCGTTGGTGTGATTCTAAGAATATGATGCAGGTTAACTCTGACCCGAAATCATGGGAGCAAGGT  
CGGGATATTCTGGAGGAAGCACGTAAGGGAATCATTGCGAGCAACCCCTGGATAACCAATAAGCAACTGACCATGTA  
TTCTCAAGGTGACTCCATTTACCTTATGGACACCACAGGTCAAGTCAGAGTCCGATACGACAAAGAGTTACTCTCGA  
AGGTCTGGAGTGAGAACCAGAAGAACTCGAAGAGAAAGCTCGTGAGAAGGCTCTGGCTGATGTGAACAAGCGAGCA  
CCTATAGTTGCCGCTACGAAGGCCCGTGAAGCTGCTGCTAAACGAGTCCGAGAGAAACGTAACAGACTCCTAAGTT  
CATCTACGGACGTAAGGAGTAACTAAAGGCTACATAAGGAGGCCCTAAATGGATAAGTACGATAAGAACGTACCAAG  
TGATTATGATGGTCTGTTCCAAAAGGCTGCTGATGCCAACGGGGTCTCTTATGACCTTTTACGTAAGTTCGCTTGGGA  
CAGAATCACGATTTGTGCCTACAGCAAAATCTAAGACTGGACCATTAGGCATGATGCAATTTACCAAGGCAACCCGCT  
AAGGCCCTCGGTCTGCGAGTTACCGATGGTCCAGACGACGACCAGTGAACCCTGAGTTAGCTATTAATGCTGCCGC  
TAAGCAACTTGCAGGTCTGGTAGGGAAAGTTTGGTGGCGATGAACTCAAAGCTGCCCTTGGCTACAACCAAGGCGAGG  
GACGCTTGGGTAATCCACAACCTGAGGCGTACTCTAAGGGAGACTTCGCATCAATCTCTGAGGAGGGACGTAACCTAC  
ATGCGTAACCTTCTGGATGTTGCTAAGTACCTATGGCTGGACAGTTGGAACTTTTGGTGGCATAACCCCAAAGGG  
TAAAGGCATTTCCGGCTGAGGTAGGATTGGCTGGAATTTGGTACAAGCAGAAAGTAAACACAGGAACCTTCTGAGTCCA  
CAAGTTTTGACGTTAAGGGTATCGAACAGGAGGCTACGGCGAAACCACTTCGCAAGGACTTTTGGGAGACCCACGGA  
GAAACACTTGACGAGTACAACAGTCGTTCAACCTTCTTTCGATTCAAAAATGCTGCCGAAGCTGAACTCTCCAACCTC  
AGTGCCTGGGATGGCTTTCCGCTGCTGGTTCGATAATGGTTTTGATGTGTTTTAAAGACACCATTACGCCGACTC  
GCTGGAACCTCTCACATCTGGACTCCAGAGGAGTTAGAGAAGATTGAAACAGAGGTTAAGAACCCTGCGTACATCAAC  
GTTGTAACCTGGTGGTTCCCTGAGAACCTCGATGACCTCATTAATTTGGCTAACGAGAACCTTTGAGAATGACTCCCG  
CGCTGCCGAGGCTGGCCTAGGTGCCAACTGAGTGTGGTATTATTGGTGTGGTGTGGACCCGCTTAGCTATGTTT  
CTATGGTCCGTGCTACTGGTAAGGGCTTTAAGTTAATCAATAAGGCTCTTGTAGTTGGTGGCGAAAGTGTGCTCTG  
AACGTTGCATCCGAAGTCTCCGTACCTCCGTAGCTGGTGGTGGTGGTGGTGGTGGTGGTGGTGGTGGTGGTGGTGGT  
TGTGTTTTGGCGCAGGCATGTCTGCAATCAGTGACGCTGTAGCTGCTGGACTGAAACGCAGTAAACCAGAAGCTGAGT  
TCGACAATGAGTTCATCGGTCCTATGATGCGATTGGAAGCCCGTGGACAGCACGAAACGCCAACTCTGCGGACCTC

TCTCGGATGAACACTGAGAACATGAAGTTTGAAGGTGAACATAATGGTGTCCCTTATGAGGACTTACCAACAGAGAG  
AGGTGCCGTGGTGTACATGATGGCTCCGTTCTAAGTGCAAGCAACCCAATCAACCCTAAGACTCTAAAAGAGTTCT  
CCGAGGTTGACCCTGAGAAGGCTGCGCGAGGAATCAAAGTGGCTGGGTTACCGGAGATTGGCTTGAAGACCTTGGGG  
TCTGACGATGCTGACATCCGTAGAGTGGCTATCGACCTCGTTCGCTCTCCTACTGGTATGCAGTCTGGTGCCTCAGG  
TAAGTTCGGTGCAACAGCTTCTGACATCCATGAGAGACTTTCATGGTACTGACCAGCGTACTTATAATGACTTGTACA  
AAGCAATGTCTGACGCTATGAAAGACCCTGAGTTCTCTACTGGCGGCGCTAAGATGTCCCCTGAAGAACTCGATAC  
ACTATCTACCGTAGAGCGGCACTAGCTATTGAGCGTCCAGAACTACAGAAGGCACACTCACTCCGTCTGAGAGAATCGT  
TATGGACATCATTAAGCGTCACTTTGACACCAAGCGTGAACCTTATGGAAAACCCAGCAATATTCGGTAACACAAAGG  
CTGTGAGTATCTTCCCTGAGAGTCGCCACAAAGGTAACCTTACGTTCCCTCACGTATATGACCCTCATGCCAAGGCGCTG  
ATGATTCACAGCTACGGTGCAGAGGTTTGCAGGAAGGATTGCCCGCTCATGGATGAACAGTACGTCTCCAGACC  
TGAGGTCAAGGCCAGAGTCGATGAGATGCTTAAGGAATTACACGGGGTGAAGGAAGTAAACACCCAGAGTGGTAGAGA  
AGTACGCTATGGATAAGGCTTATGGTATCTCCCACTCAGACCAGTTACCAACAGTTCCATAATAGAAGAGAACATT  
GAGGGCTTAGTAGGTATCGAGAATAACTCATTCCCTTGGAGCACGTAACCTTGTTTGGATTTCGGACCTATCCATCACTAT  
GCCAGACGGACAGCAATTTCTCAGTGAATGACCTAAGGGACTTCGATATGTTCCGCATCATGCCAGCGTATGACCGCC  
GTGTCAATGGTGACATCGCCATCATGGGGTCTACTGGTAAAACCACTAAGGAACTTAAGGATGAGATTTTGGCTCTC  
AAAGCGAAAGCTGAGGGAGACGGTAAGAAGACTGGCGAGGTACATGCTTTAATGGATACCGTTAAGATTCTTACTGG  
TCGTGCTAGACGCAATCAGGACACTGTGTGGGAAACCTCACTGCGTGCCATCAATGACCTAGGGTCTTTCGCTAAGA  
ACGCCTACATGGGTGCTCAGAACATTACGGAGATTGCTGGGATGATTGTCACTGGTAACGTTTCGTGCTCTAGGGCAT  
GGTATCCCAATTTCTGCGTGATACACTCTACAAGTCTAAACCAGTTTCAGCTAAGGAACTCAAGGAACTCCATGCGTC  
TCTGTTCCGGAAGGAGGTGGACCAGTTGATTCCGCCCTAAACGTGCTGACATTGTGCAGCGCCTAAGGGAAGCAACTG  
ATACCGGACCTGCCGTGGCGAACATCGTAGGGACCTTGAAGTATTCAACACAGGAACTGGCTGCTCGCTCTCCGTGG  
ACTAAGCTACTGAACGGAACCACTAACTACCTTCTGGATGCTGCGCGTCAAGGTATGCTTGGGGATGTTATTAGTGC  
CACCTAACAGGTAAGACTACCCGCTGGGAGAAAGAAGGCTTCCCTTCGTGGTGCCTCCGTAACCTCCTGAGCAGATGG  
CTGGCATCAAGTCTCTCATCAAGGAACATATGGTACGCGGTGAGGACGGGAAGTTTACCGTTAAGGACAAGCAAGCG  
TTCTCTATGGACCCACGGGCTATGGACTTATGGAGACTGGCTGACAAGGTAGCTGATGAGGCAATGCTGCGTCCACA  
TAAGGTGTCCCTTACAGGATTCCCATGCGTTCGGGAGCACTAGGTAAGATGGTTATGCAGTTTAAAGTCTTTCACTATCA  
AGTCCCTTAACTCTAAGTTCCCTGCGAACCTTCTATGATGGATAACAAGAACAACCCGAGCGATTGACGCTGCGCTGAGC  
ATCATCACTCTATGGGTCTCGCTGGTGGTTCCTATGCTATGGCTGCACACGTCAAAGCAATCACTCTGCCTAAGGA  
GAAACGTAAGGAGTACTTGGAGCGTGCACCTGGACCCAAACCTGATTGCCCCACGCTGCGTTATCTCGTAGTTCTCAAT  
TGGGTGCTCCCTTGGCTATGGTTGACCTAGTTGGTGGTGTTCCTAGGGTTCGAGTCCCAAGATGGCTCGCTCACTAG  
ATTCTACCTAAGGACACCGTGAAGGAACGTGACCCAAACAAACCGTACACCTCTAGAGAGGTAATGGGCGCTATGGG  
TTCAAACCTTCTGGAACAGATGCCTTCGGCTGGCTTTGTGGCTAACGTAGGGGCTACCTTAATGAATGCTGCTGGCG  
TGGTCAACTCACCTAATAAAGCAACCCGAGCAGGACTTCATGACTGGTCTTATGAACTCCACAAAAGAGTTAGTACCG  
AACGACCCATTGACTCAACAGCTTGTGTTGAAGATTTATGAGGCGAACGGTGTAACTTGAAGGAGCGTAGGAAATA  
ATACGACTCACTATAGGGAGAGGCGAAATAATCTTCCCTGTAGTCTCTTAGATTTACTTTAAGGAGGTCAAATGG  
CTAACGTAATTTAAACCGTTCCTGACTTACCAGTTAGATGGCTCCAATCGTGATTTTAAATATCCCGTTTGGAGTATCTA  
GCCCCGTAAGTTTCGTAGTGGTAACCTCTTATTGGTGTAGACCGAAAGGTCCTTACGATTAATACAGACTATCGCTTTGC  
TACACGTACTACTATCTCTGACAAAGGCTTGGGGTCCAGCCGATGGCTACACGACCATCGAGTTACGTGAGTAA  
CCTCCACTACCGACCGATTGGTTGACTTTACGGATGGTTCAATCCTCCGCGCGTATGACCTTAAAGTGCCTCAGATT  
CAAACGATGCACGTAGCGGAAGAGGCCCGTACCTCACTACGGATACTATCGGTGTCAATAACGATGGTCACTTGGGA  
TGCTCGTGGTTCGTCGAATTTGTGAACCTAGCGAACGCCGTGGATGACCGCGATGCTGTTCCGTTTGGTCAACTAAAGA  
CCATGAACCAGAACTCATGGCAAGCAGTAATGAAGCCTTACAGTTCGGTAATGAGGCTGAGACTTTCAGAAACCAA  
GCGGAGGGCTTTAAGAACGAGTCCAGTACCAACGCTACGAACCAAAGCAGTGGCGCGATGAGACCAAGGGTTTCCG  
AGACGAAGCCAAGCGGTTCAAGAATACGGCTGGTCAATACGCTACATCTGCTGGGAACTCTGCTTCCGCTGCGCATC  
AATCTGAGGTAACCGCTGAGAACTCTGCCACAGCATCCGCTAACTCTGCTCATTGGCAGAACAGCAAGCAGACCGT  
GCGGAACGTGAGGCGAGACAAGCTGGAAAATTACAATGGATTGGCTGGTGAATGATAAGGTAGATGGAACCAATGT  
GTACTGGAAGGAAATATTCACGCTAACGGGCGCCTTTACATGACCACAAACGGTTTTGACTGTGGCCAGTATCAAC  
AGTTCTTTGGTGGTGTCACTAATCGTTACTCTGTGATGGAGTGGGGAGATGAGAACGGATGGCTGATGTATGTTCAA  
CGTAGAGAGTGGACAACAGCGATAGGCGGTAACATCCAGTTAGTAGTAAACGGACAGATCATCACCCAAGGTGGAGC  
CATGACCGGTGAGCTAAAATTGCAGAATGGGCATGTTCTTCAATTAGAGTCCGCATCCGACAAGGCGCACTATATTC  
TATCTAAAGATGGTAACAGGAATAACTGGTACATTGGTAGAGGGTACAGATAACAACAATGACTGTACCTTCCACTCC  
TATGTACATGGTACGACCTTAACTCAAGCAGGACTATGCAGTAGTTAAACAAACACTTCCACGTAGGTGAGGCCGT  
TGTGGCCACTGATGGTAATATTCAGGTAAGTGGGGAGGTAAATGGCTGGATGCTTACCTACGTGACAGCTTCG  
TTGCGAAGTCCAAGGCGTGGACTCAGGTGTGGTCTGGTAGTGCTGGCGGTGGGGTAAAGTGTGACTGTTTACAGGAT  
CTCCGCTTCCGCAATATCTGGATTAAGTGTGCCAACAACCTTGGAACTTCTTCCGTAAGTGGCCCCGATGGAATCTA  
CTTCATAGCCTCTGATGGTGGATGGTTACGATTCCAATACACTCCAACGGTCTCGGATTCAAGAATATTGCAGACA  
GTCGTTCACTACCTAATGCAATCATGGTGGAGAACGAGTAATTGGTAAATCACAAGGAAAGACGTGTAGTCCACGGA

TGGACTCTCAAGGAGGTACAAGGTGCTATCATTAGACTTTAACAACGAATTGATTAAGGCTGCTCCAATTGTTGGGA  
CGGGTGTAGCAGATGTTAGTGTCTGACTGTTCTTTGGGTTAAGCCTTAACGAATGGTTCTACGTTGCTGCTATCGCC  
TACACAGTGGTTAGATTGGTGCCAAGGTAGTCGATAAGATGATTGACTGGAAGAAAGCCAATAAGGAGTGATATGT  
ATGAAAAGGATAAGAGCCTTATTACATTCTTAGAGATGTTGGACACTGCGATGGCTCAGCGTATGCTTGCAGCCT  
TTCGGACCATGAGCGTCGCTCTCCGCAACTCTATAATGCTATTAACAACTGTTAGACCGCCACAAGTTCCAGATTG  
GTAAGTTGCAGCCGGATGTTACATCTTAGGTGGCCTTGGTGGTCTTGAAGAGTACAAAGAGAAAGTCCGGTGAT  
AACGGTCTTACGGATGATGATATTTACACATTACAGTGATATACTCAAGGCCACTACAGATAGTGGTCTTTATGGAT  
GTCATTGTCTATACGAGATGCTCCTACGTGAAATCTGAAAGTTAACGGGAGGCATTATGCTAGAATTTTTACGTAAG  
CTAATCCCTTGGGTTCTCGCTGGGATGCTATTCGGGTTAGGATGGCATCTAGGGTCAGACTCAATGGACGCTAAATG  
GAAACAGGAGGTACACAATGAGTACGTTAAGAGAGTTGAGGCTGCGAAGAGCACTCAAAGAGCAATCGATGCGGTAT  
CTGCTAAGTATCAAGAAGACCTTGCCGCGCTGGAAGGGAGCACTGATAGGATTATTTCTGATTTGCGTAGCGACAAT  
AAGCGGTTGCGCTCAGAGTCAAAACTACCGGAACCTCCGATGGTCAGTGTGGATTTCGAGCCTGATGGTCGAGCCGA  
ACTTGACGACCGAGATGCTAAACGTATTCTCGCAGTGACCCAGAAGGGTGACGCATGGATTTCGTGCGTTACAGGATA  
CTATTTCGTGAAGTGAACGTAAGTAGGAAATCAAGTAAGGAGGCAATGTGTCTACTCAATCCAATCGTAATGCGCTC  
GTAGTGGCGCAACTGAAAGGAGACTTCGTGGCGTTTCTATTTCGTCTTATGGAAGGCGCTAAACCTACCGGTGCCAC  
TAAGTGTGAGATTGACATGGCTAAGGTGCTGGCGAATGGAGACAACAAGAAGTTCATCTTACAGGCTTTCCGTGGTA  
TCGGTAAGTCGTTTCATCACATGTGCGTTCGTTGTGTGGTCCTTATGGAGAGACCCTCAGTTGAAGATACTTATCGTA  
TCAGCCTCTAAGGAGCGTGCAGACGCTAACTCCATCTTTATTAAGAACATCATTGACCTGCTGCCATTCCTATCTGA  
GTTAAAGCCAAGACCCGGACAGCGTGACTCGGTAATCAGCTTTGATGTAGGCCAGCCAATCCTGACCACTCTCCTA  
GTGTGAAATCAGTAGGTATCACTGGTCAGTTAACTGGTAGCCGTGCTGACATTATCATTGCGGATGACGTTGAGATT  
CCGTCTAACAGCGCAACTATGGGTGCCCGTGAGAAGCTATGGACTCTGGTTTCAGGAGTTTCGTGCGTTACTTAAACC  
GCTGCCTTCTCTCGCGTTATCTACCTTGGTACACCTCAGACAGAGATGACTCTCTATAAGGAACCTTGAGGATAACC  
GTGGGTACACAACCATTATCTGGCCTGCTCTGTACCCAAGGACACGTGAAGAGAACCTCTATTACTCACAGCGTCTT  
GCTCCTATGTTACGCGCTGAGTACGATGAGAACCCTGAGGCACCTTGCTGGGACTCCAACAGACCCAGTGCCTTTGA  
CCGTGATGACCTGCGCGAGCGTGAGTTGGAATACGGTAAGGCTGGCTTTACGCTACAGTTTCATGCTTAAACCCTAAC  
TTAGTGATGCCGAGAAGTACCCGCTGAGGCTTCGTGACGCTATCGTAGCGGCCTTAGACTTAGAGAAGGCCCAATG  
CATTACCAGTGGCTTCCGAACCGTCAGAACATCATTGAGGACCTTCCTAACGTTGGCCTTAAGGGTGATGACCTGCA  
TACGTACCACGATTGTTCCAACAACCTCAGTTCAGTACCAACAAGAAGATTCTGGTCATTGACCCCTAGTGGTGCAGGTA  
AGGGAACAACAGGTTACGCTGTGCTGTACACACTGAACGGTTACATCTACCTTATGGAAGCTGGAGGTTTCCGTGAT  
GGCTACTCCGATAAAGACCTTGGATTACTCGCTAAGAAGGCAAAGCAATGGGGAGTCCAGACGGTTGTCTACGAGAG  
TAACTTCGGTGACGGTATGTTTCGGTAAGGTATTAGTCCATCTCTTCTTAAACACCACAACCTGTGCGATGGAAGAGA  
TTCGTGCCCCGTGGTATGAAAGAGATGCGTATTTGCGATAACCCTTGAGCCAGTCATGCAGACTCACCGCCTTGTAATT  
CGTGATGAGGTCATTAGGGCCGACTACCAGTCCGCTCGTGACGTAGACGGTAAGCATGACGTTAAGTACTCGTTGTT  
CTACCAGATGACCCGTATCACTCGTGAGAAAGGCGCTCTGGCTCATGATGACCGATTGGATGCCCTTGCCTTAGGCA  
TTGAGTATCTCCGTGAGTCCATGCAGTTGGATTCCGTTAAGGTCGAGGGTGAAGTACTTGCTGACTTCCTTGAGGAA  
CACATGATGCGTCTACGGTTGCTGCTACGCATATCATTGAGATGTCTGTGGGAGGAGTTGATGTGACTCTGAGGA  
CGATGAGGGTTACGGTACGTCTTTTATTGAGTGGTGATTTATGCATTAGGACTGCATAGGGATGCACTATAGACCAC  
GGATGGTCAGTTCTTTAAGTTACTGAAAAGACACGATAAATTAATACGACTCACTATAGGGAGAGGAGGGACGAAAG  
GTTACTATATAGATACTGAATGAATACTTATAGAGTGCATAAAGTATGCATAATGGTGTACCTAGAGTGACCTCTAA  
GAATGGTGATTATATTGATTAGTATCACCTTAACTTAAAGGACCAACATAAAGGGAGGAGACTCATGTTCCGCTTAT  
TGTTGAACCTACTGCGGCATAGAGTACCTACCGATTTCTTGTGGTACTTTGTGCTGCCCTTGGGTACGCATCTCTT  
ACTGGAGACCTCAGTTCAGTGGAGTCTGTGCTTTGCTCTATACTCACTTGTAGCGATTAGGGTCTTCTGACCGACT  
GATGGCTCACCGAGGGATTACGCGGTATGATTGCATCACACCACTTCATCCCTATAGAGTCAAGTCCCTAAGGTATAC  
CCATAAAGAGCCTCTAATGGTCTATCCTAAGGTCTATACCTAAAGATAGGCCATCCTATCAGTGTACCTAAAGAGG  
GTCTTAGAGAGGGCCTATGGAGTTCCTATAGGGTCCCTTAAAAATATACCATAAAAAATCTGAGTGACTATCTCACAGT  
GTACGGACCTAAAGTTCACCCATAGGGGGTACCTAAAGCCCAGCCAATCACCTAAAGTCAACCTTCGGTTGACCTTG  
AGGGTCCCTAAGGGTTGGGGATGACCCCTTGGGTTTGTCTTTGGGTGTTACTTCCCCATAGGGGGTACCTAAAGCC  
CAGCCAATCACCTAAAGTCAACCTTCGGTTGACCTTGGGGTTCCCTAAGGGTTGGGGATGACCCCTTGGGTTTGTCT  
TTGGGTGTTACCTTGGAGTGTCTCTCTGTGTCCCTATCTGTTACAGTCTCCTAAAGTATCCTCCTAAAGTACCTCCT  
AACGTCCATCCTAAAGCCAACACCTAAAGCCTACACCTAAAGACCCATCAAGTCAACGCCTATCTTAAAGTTTAAAC  
ATAAAGACCAGACCTAAAGACCAGACCTAAAGACACTACATAAAGACCAGACCTAAAGACGCCTTGTGTTAGCCAT  
AAAGTGATAACCTTTAATCATTGTCTTTATTAATACAACCTCACTATAAGGAGAGACAACCTTAAAGAGACTTAAAGA  
TTAATTTAAAATTTATCAAAAAGAGTATTGACTTAAAGTCTAACCTATAGGATACTTACAGCCATCGAGAGGGACAC  
GGCGAATAGCCATCCCAATCGACACCGGGGTCAACCGGATAAGTAGACAGCCTGATAAGTCGCACGAAAAACAGGTA  
TTGACAACATGAAGTAACATGCAGTAAGATACAAATCGCTAGGTAACACTAGCAGCGTCAACCGGGCGCACAGTGCC  
TTCTAGGTGACTTAAAGCGCACACGGCACATAAGGTGAAACAAAACGGTTGACAACATGAAGTAAACACGGTACGAT  
GTACCACATGAAACGACAGTGAGTACCACACTGAAAGGTGATGCGGTCTAACGAAACCTGACCTAAGACGCTCTTT



CTGATTTGGGAATCTGTGAGCGTGACGGTGGTAGCTGCGGTTGAAGCAATGAACTGGCTTAAGTCTGCTGCTAAGCT  
GCTGGCTGCTGAGGTCAAAGATAAGAAGACTGGAGAGATTCTTCGCAAGCGTTGCGCTGTGCATTGGGTAACCTCTG  
ATGGTTTCCCTGTGTGGCAGGAATACAAGAAGCCTATTTCAGACGCGCTTGAACCTGATGTTCCCTCGGTGAGTTCCGC  
TTACAGCCTACCATTAACACCAACAAAGATAGCGAGATTGATGCACACAAACAGGAGTCTGGTATCGCTCCTAACTT  
TGTACACAGCCAAGACGGTAGCCACCTTCGTAAGACTGTAGTGTGGGCACACGAGAAGTACGGAATCGAATCTTTTG  
CACTGATTCACGACTCCTTCGGTACCATTCCGGCTGACGCTGCGAACCTGTTCAAAGCAGTGCAGGAACTATGGTT  
GACACATATGAGTCTTGTGATGTACTGGCTGATTTCTACGACCAGTTTCGCTGACCAGTTGCACGAGTCTCAATTGGA  
CAAAATGCCAGCACTTCCGGCTAAAGGTAACCTGAACTCCGTGACATCTTAGAGTCGGACTTCCGCTTCCGCTAAC  
GCCAAATCAATACGACTCACTATAGAGGGACAACTCAAGGTCATTTCGCAAGAGTGGCCTTTATGATTGACCTTCTT  
CCGGTTAATACGACTCACTATAGGAGAACCCTTAAGGTTAACTTTAAGACCCTTAAGTGTTAATTAGAGATTTAAAT  
TAAAGAATTACTAAGAGAGGACTTTAAGT

>NRG-P0103

ATGCGTAACTTCGAAAAGATGACCAAACGTTCTAACCCTAATGCTCGTGACTTCGAGGCAACCAAAGGTCGCAAGTT  
GAATAAGACTAAGCGTGACCGCTCTCACAAGCGTAGCTGGGAGGGTCAGTAAGATGGGACGTTTATATAGTGGTAAT  
CTGGCAGCATTCAAGGCAGCAACAAACAAGCTGTTCCAGTTAGACTTAGCGGTCATTTATGATGACTGGTATGATGC  
CTATAACAAGAAAAGATTGCATACGGTTACGTATTGAGGACAGGAGTGGAAACCTGATTGATACTAGCACCTTCTACC  
ACCACGACGAGGACGTTCTGTTCAATATGTGTACTGATTGGTTGAACCATATGTATGACCAGTTGAAGGACTGGAAG  
TAATACGACTCAGTATAGGGACAATGCTTAAGGTCGCTCTCTAGGAGTGGCCTTAGTCATTTAACCAATAGGAGATA  
AACATTATGATGAACATTAAGACTAACCCTGTTTAAAGCCGTGTCTTTTCGTAGAGTCTGCCATTAAGAAGGCTCTGGA  
TAACGCTGGGTATCTTATCGCTGAAATCAAGTACGATGGTGTACGCGGGAACATCTGCGTAGACAATACTGCTAACA  
GTTACTGGCTCTCTCGTGTATCTAAAACGATTCCGGCAGTGGAGCACTTAAACGGGTTTATGTTCCGCTGGAAGCGT  
CTACTGAACGATGACCGTTGCTTCTACAAAGATGGCTTTATGCTTGATGGGGAACCTCATGGTCAAGGGCGTAGACTT  
TAACACAGGGTCCGGCCTACTGCGTACCAAATGGACTGACACGAAGAACCAAGAGTTCCATGAAGAGTTATTCGTTG  
AACCAATCCGTAAGAAAAGATAAAGTTCCCTTTAAGCTGCACACTGGACACCTTCACATAAAAAGTGTACGCTATCCTC  
CCGCTGCACATCGTGGAGTCTGGAGAAGACTGTGATGTATGACGTTGCTCATGCAGGAACACGTTAAGAATGCT  
GCCTCTGCTACAGGAATACTTCCCTGAAATCGAATGGCAAGCGGCTGAATCTTACGAGGCTACGATATGGTAGAAC  
TACAGCAACTGTACGAGCAGAAGCGAGCAGAAGGCCATGAGGGTCTCATTGTGAAAGACCCGATGTGTATCTATAAG  
CGCGGTAAGAAATCTGGCTGGTGGAAAATGAAACCTGAGAACGAAGCTGACGGTATCATTACAGGCTCTGGTATGGGG  
TACAAAAGGCTCTGGCTAATGAAGGTAAAGTGATTGGTTTTGAGGTGCTTCTTGAGAGTGGTCGTTTAGTTAACGCCA  
CGAATATCTCTCGCGCCTTAATGGATGAGTTCACTGAGACAGTAAAAGAGGCCACCCTAAGTCAATGGGGATTCTTT  
AGCCCATACGGTATTGGCGACAACGATGCTTGTACTATTAACCCTTACGATGGCTGGGCGTGTCAAATTAGCTACAT  
GGAGGAAACACCTGATGGCTCTTTGCGGCACCCATCGTTTCTAATGTTCCGTTGGCACCGAGGACAACCCTCAAGAGA  
AAATGTAATCACACTGGCTCACCTTCGGGTGGGCCTTTCTGCGTTTATAAGGAGACACTTTATGTTTAAAGAAGGTTG  
GTAAATTCCTTGGCGCTTTGGCAGCTATCCTGACGCTTGCCTATATTCTTGGCGTATACCCTCAAGTAGCACTAGTA  
GTAGTTGGCGCTTGTACTTAGCGGCAGTGTGTGCTTGCCTGTGGAGTATAGTTAACTGGTAATACGACTCACTAAA  
GGAGGTACACACCATGATGTACTTAATGCCATTACTCATCGTCATTGTAGGATGCCTTGCCTCCACTGTAGCGATG  
ATGATATGCCAGATGGTCACGCTTAATACGACTCACTAAAGGAGACACTATATGTTTCGACTTCATTACAACAAAAG  
CGTTAAGAATTTACGGTTCCCGGTGCTGACCGTTCAATCGTATGTGCGAGCGAGCGCCGAGCTAAGATACCTCTTA  
TTGGTAACACAGTTCTTTGGCACCAGCGTCCACATCATTATACCCGTTGGTGACTTTGAGAAAGCAATAGACAAG  
AAACGTCGGGTTCTTAGTGTGGCAGTGACCCGCTTCCCGTTTCGTCGGTCTGTTACTCAAACGAATCAAGGAGGTGTT  
CTGATGGGACTGTTAGATGGTGAAGCCTGGGAAAAAGAAAACCCGCCAGTACAAGCAACTGGGTGTATAGCTTGCTT  
AGAGAAAGATGACCGTTATCCACACACCTGTAACAAAGGAGCTAACGATATGACCGAAGCTGAACAAGAGATGATCA  
TTAAGTTGATAGACAATAATGAAGGTCGCCCAGATGATTTGAATGGCTGCGGTATTCTCTGCTCCAATGTCCCTTGC  
CACCTCTGCCCCGCAATAACGATCAAAAGATAACCTTAGGTGAAATCCGAGCGATGGACCCACGTAACCACATCT  
GAATAAACCTGAGGTAACCTTACAGATGACCAAGCCTTCCGCTGAGACAATCGAAGGTGTCACTAAGCCTTCCCCT  
ACATGCTGTTTACGACACTTGGGCTATCGAAGTATTGCTCGTTCAATGACCGTTGAGCAGTTCAAGGGATACTGC  
TTCGGTAACATCTTAAAGTACAGACTACGTGCTGGTAAGAAGTCAAGTATAGCGTACTTAGAGAAAAGACCTAGCGAA  
AGCAGACTTCTATAAAGAAGTCTTTGAGAAACATAAGGATAAATGTTATGCATAACTTCAAGTCAACCCACCTGCC  
GACAGCCTATCTGATGACTTACATCTTGTCTCAGAGTGGTGCCGAAAGATGTGGGAAGAGACATTTCGACGATGCGTA  
CATCAAGCTGTATGAACTTTGGAAATCGAGAGGTCAATGACTATGTCAAACGTAATAACAGGTTCACTTAGTGTGGA  
CAATAAGAAGTTTTGGGCTACCGTAGAGTCCCTCGGAGCATTCCCTTCGAGGTTCCAATCTACGCTGAGACCCTAGACG  
AAGCTCTGGAGTTAGCCGAATGGCAATACGTTCCGGCTGGCTTTGAGGTTACTCGTGTGCGTCTTGTGTAGCACCG  
AAGTAATACGACTCACTATTAGGGAAGACTCCCTCTGAGAAACCAAACGAAACCTAAAGGAGATTAACATTATGGCT  
AAGAAGATTTTACCTCTGCGCTGGGTACCCTGAACTTACGCTTACATCGCAAGCCGGACTACGGCAACGAAGA  
GCGTGGCTTTGGGAACCCTCGTGGTGTCTATAAAGTTGACCTGACTATTCCCAACAAAGACCCGCGCTGCCAGCGTA  
TGGTCGATGAAATCGTGAAGTGTACGAAGAGGCTTATGCTGCTGCCGTTGAGGAATACGAAGCTAATCCACCTGCT

GTAGCTCGTGGTAAGAAACCGCTGAAACCGTATGAGGGTGACATGCCGTTCTTCGATAACGGTGACGGTACGACTAC  
CTTTAAGTTCAAATGCTACGCGTCTTTCCAAGACAAGAAGACCAAAGAGACCAAGCACATCAATCTGGTTGTGGTTG  
ACTCAAAGGTAAGAAGATGGAAGACGTTCCGATTATCGGTGGTGGCTCTAAGCTGAAAGTTAAATATTCTCTGGTT  
CCATACAAGTGGAACACTGCTGTAGGTGCGAGCGTTAAGCTGCAACTGGAATCCGTGATGCTGGTCGAACTGGCTAC  
CTTTGGTGGCGGTGAAGACGATTGGGCTGACGAAGTTGAAGAGAACGGCTATGTTGCCTCTGGTTCTGCCAAAGCGA  
GCAAACCACGCGACGAAGAAAGCTGGGACGAAGACGACGAAGAGTCCGAGGAAGCAGACGAAGACGGGACTTCTAA  
GTGGAACCTGCGGGGAGAAAATCCTTGAGCGAATCAAGGTGACTTCCTCTGGGTGTTGGGAGTGGCAGGGCGCTACGAA  
CAATAAAGGGTACGGGCAGGTGTGGTGCAGCAATACCGGAAAGGTTGTCTACTGTCATCGCGTAATGTCTAATGCTC  
CGAAAGGTTCTACCGTCTGCACTCCTGTGATAATCCATTATGTTGTAACCCTGAACACCTATCCATAGGAACTCCA  
AAAGAGAACTCCACTGACATGGTAAATAAGGGTCGCTCACACAAGGGGTATAAACTTTCAGACGAAGACGTAATGGC  
AATCATGGAGTCCAGCGAGTCCAATGTATCCTTAGCTCGACCTATGGTGTCTCCCAACAGACTATTTGTGATATAC  
GCAAAGGGAGGCGACATGGCAGGTTACGGCGCTAAAGGAATCCGAAAGGTTGGAGCGTTTCGCTCTGGCCTAGAGGA  
CAAGGTTTTCAAAGCAGTTGGAATCAAAGGTATTAATTCGAGTATGAAGAGTGGAAAGTGCCTTATGTAATTCGGG  
CGAGCAATCACACTTACACTCCAGACTTCTTACTTCCAAACGGTATATTCGTTGAGACAAAGGGTCTGTGGGAAAGC  
GATGATAGAAAGAAGCACTTATTAATTAGGGAGCAGCACCCCGAGCTAGACATCCGTATTGTCTTCTCAAGCTCACG  
TACTAAGTTATACAAAGGTTCTCCAACGTCTTATGGAGAGTTCTGCGAAAAGCATGGTATTAAGTTCGCTGATAAAC  
TGATACCTGCTGAGTGGATAAAGGAACCCAAAGAAGGAGGTCCCCTTTGATAGATTAAAAAGGAAAGGAGGAAAGAAA  
TAATGGCTCGTGTACAGTTTTAAACAACGTGAATCTACTGACGCAATCTTTGTTCACTGCTCGGCTACCAAGCCAAGT  
CAGAATGTTGGTGTCCGTGAGATTCGCCAGTGGCACAAGAGCAGGGTTGGCTCGATGTGGGATAACCACTTTATCAT  
CAAGCGAGACGGTACTGTGGAGGCAGGACGAGATGAGATGGCTGTAGGCTCTCACGCTAAGGGTTACAACCACA  
CTATCGGCGTCTGCCTTGTGGTGGTATCGACGATAAAGGTAAGTTCGACGCTAACTTTACGCCAGCCCAAATGCAA  
TCCCTTCGCTCACTGCTTGTACACTGCTGGCTAAGTACGAAGGCGCTGTGCTTCGCGCCCATCATGAGGTGGCGCC  
GAAGGCTTGCCCTTCGTTTCGACCTTAAGCGTTGGTGGGAGAAGAACGAACCTGGTCACTTCTGACCGTGGATAATTA  
TTGAACTCACTAAAGGGAGACCACAGCGGTTTTCCCTTTGTTTCGCATTGGAGGTCAAATAATGCGCAAGTCTTATAAA  
CAATTCTATAAGGCTCCGAGGAGGCATATCCAAGTGTGGGAGGCAGCCAATGGGCCTATACCAAAGGTTATTATAT  
AGACCACATTGACGGCAATCCACTCAACGACGCCTTAGACAATCTCCGTCTGGCTCTCCCAAAAGAAAACCTCATGGA  
ACATGAAGACTCCAAAGAGCAATACCTCAGGACTAAAGGGACTGAGTTGGAGCAAGGAAAGGGAGATGTGGAGAGGC  
ACTGTAACAGCTGAGGGTAAACAGCATAAATTTTCGTAGTAGAGATCTATTGGAAGTTCGTTGCGTGGATTTATAGA  
TAGGAGGGAATTGCATGGACAATTCGCACGATTCGATAGTATTTCTTTACCACATCTTGTGACAACCTGTGGG  
AGTAGTGATGGGAACTCGTGTCTCTGACGGACACACGTTCTGTACTGATGCGGAGAAGTGGACTGCTGGTAATGA  
AGACACTAAAGAGAGGGCTTCAAACGGAACCCCTCAGGAGGTAAACCAATGACTTACAACGTGTGGAACCTTCGGGG  
AATCCAATGGACGCTACTCCGCGTTAACTGCGAGAGGAATCTCCAAGGAAACCTGTGAGAAGGCTGGCTACTGGATT  
GCCAAAGTAGACGGTGTGATGTACCAAGTGGCTGACTATCGGGACCAGAACGGCAACATTGTGAGTCAGAAGGTTTCG  
AGATAAAGATAAGAACTTTAAGACCCTGGTAGTCACAAGAGTGACGCTCTGTTTCGGGAAGCACTTGTGGAATGGTG  
GTAAGAAGATTGTGTTACAGAAGGTGAAATCGACATGCTTACCCTGATGGAACCTCAAGACTGTAAGTATCCTGTA  
GTGTCGTTGGGTACGGTGCCTCTGCCGCTAAGAAGACATGCGCTGCCAACTACGAATACTTTGACCAGTTTCAACA  
GATTATCTTAATGTTTCGATATGGACGAAGCAGGGCGCAAAGCAGTCAAGAGGCTGCACAGGTTCTACCTGCTGGTA  
AGGTACGAGTGGCAGTTCTTCCGTGTAAGGATGCAAACGAGTGTACCTAAATGGTACGACCGTCAAATCATGGAG  
CAAGTGTGGAATGCTGGTCTTGGATTCTGATGGTGTGGTATCGGCTCTTTCGTTACGTGAACGAATCCGTGAGCA  
CCTATCGTCCGAGGAATCAGTAGGTTTACTTTTTCAGTGGCTGCACTGGTATCAACGATAAGACCTTAGGTGCCCGTG  
GTGGTGAAGTCATTATGGTCACTTCCGGTTCGGGTATGGGTAAGTCAACGTTTCGTTCCGTCAACAAGCTCTACAATGG  
GGCACAGCGATGGGCAAGAAGGTAGGCTTAGCGATGCTTGAGGAGTCCGTTGAGGAGACCGCTGAGGACCTTATAGG  
TCTACACAACCGTGTCCGACTGAGACAATCCGACTCACTAAAGAGAGAGATTATTGAGAACGGTAAGTTCGACCAAT  
GGTTCGATGAACTGTTTCGGCAACGATAACGTTCCATCTATATGACTCATTTCGCCGAGGCTGAGACGGATAGACTGCTC  
GCTAAGCTGGCCTACATGCGCTCAGGCTTGGGCTGTGACGTAATCATTCTAGACCACATCTCAATCGTTCGTATCCGC  
TTCTGGTGAATCCGATGAGCGTAAGATGATTGACAACCTGATGACCAAGCTCAAAGGGTTCGCTAAGTCAACTGGG  
TGGTGTGGTTCGTAATTTGTACCTTAAGAACCCAGACAAAGGTAAGCACATGAGGAAGGTCGCCCCGTTTTCTATT  
ACTGACCTACGTGGTTCTGGCGCACTACGCCAACTATCTGATACTATTATTGCCCTTGAGCGTAATCAGCAAGGCGA  
TATGCCATAACCTTGTCTCGTTTCGTAATTCTCAAGTCCGCTTTACTGGTGATACTGGTATCGCTGGCTACATGGAAT  
ACAACAAGGAAACCGGATGGCTTGAACCATCAAGTTACTCAGGGGAAGAAGAGTCACTCAGAGTCAACAGACTGG  
TCCAACGACACTGACTTCTGACAGGATTCTTGATGACTTTCAGACGACTACGAGAAGTTTCGCTGGAGAGTCCCAT  
TCTAATACGACTCACTAAAGGAGACACACCATGTTCAAACCTGATTAAGAAGTTAGGCCAACTGCTGGTTTCGTATGTA  
CAACGTGGAAGCCAAGCGACTGAACGATGAGGCTCGTAAAGAGGGCCACACAGTCAACGCGCTCTGGCGATTTCGCTCCA  
ACGAACTGGCTGACAGTGCATCCACTAAAGTTACCGAGGCTGCCCGTGTGGCAAACCAAGCTCAACAGCTTTCCAAA  
TTCTTTGAGTAATCAAACAGGAGAAACCATTATGTCTAACGTAGCTGAAACTATCCGTCTATCCGATACAGCTGACC  
AGTGAACCGTCCAGTCCACATCAACGTTTCGCAACGGTAAGGCGACTATGGTTTACCGCTGGAAGGACTCTAAGTCC  
TCTAAGAATCACACTCAGCGTATGACGTTGACAGATGAGCAAGCACTGCGTCTGGTCAATGCGCTTACCAAAGCTGC

CGTGACAGCAATTCATGAAGCTGGTTCGCGTCAATGAAGCTATGGCTATCCTCGACAAGATTGATAACTAAGAGTGGT  
ATCCTCAAGGTCGCCAAAGTGGTGGCCTTCATGAATACTATTTCGACTCACTATAGGAGATATTACCATGCGTGACCC  
TAAAGTTATCCAAGCAGAAATCGCTAAACTGGAAGCTGAACTGGAGGACGTTAAGTACCATGAAGCTAAGACTCGCT  
CCGCTGTTTACATCTTGAAGAAGTTAGGCTGGACTTGGACAAGACAGACTGGCTGGAAGAAACCAGAAGTTACCAAG  
CTGAGTCATAAGGTGTTTCGATAAGGACACTATGACCCACATCAAGGCTGGTGATTGGGGTTAAGGTTGACATGGGAGT  
TGTTGGTGGATACGGCTACGTCCGCTCAGTTAGTGGCAAATATGCACAAGTGTCCATACATCACAGGTGTTACTCCAC  
GCGGTGCAATCGTTGCCGATAAGACCAACATGATTACACACAGGTTTCTTGACAGTTGTTTCATATGAAGAGATTGTT  
AAGTCACGATAATCAATAGGAGAAATCAATATGATCGTTTCTGACATCGAAGCTAACGCCCTCTTAGAGAGCGTCCAC  
TAAGTTCCTACTGCGGGGTTATCTACGACTACTCCACCGCTGAGTACGTAAGCTACCGTCCGAGTGACTTCGGTGCCT  
ATCTGGATGCGCTGGAAGCCGAGGTTGCACGAGGCGGCTTATTGTGTTCCACAACGGTCACAAGTATGACGTTCTCT  
GCATTGACCAAACTGGCAAAGTTGCAATTGAACCGAGAGTTCCACCTTCTCGTGAGAAGTTGATTGACACCCCTTGT  
GTTGTACGTTTGTATTCAATCCAACCTCAAGGACACCGATATGGGCTTCTGCGTTCCGGCAAGTTGCCCGAAAAC  
GCTTTGGGTCTCACGCTTTGGAGGCGTGGGGTTATCGCTTAGGCGAGATGAAGGGTGAATACAAAGACGACTTTAAG  
CGTATGCTTGAAGAGCAGGGTGAAGAATACGTTGACGGAATGGAGTGGTGGAACTTCAACGAAGAGATGATGGACTA  
TAACGTTTACGAGCGTTGTGGTAACTAAAGCTCTCCTTGAGAAGCTACTCTGACAAAACATTACTTCCCTCCTGAGA  
TTGACTTTACGGACGTAGGATACACTACGTTCTGGTTCAGAATCCCTTGAGGCCGTTGACATTGAACATCGTGCTGCA  
TGGCTGCTCGCTAAACAAGAGCGCAACGGGTTCCCGTTTGACACAAAAGCAATCGAAGAGTTGTACGTAGAGTTAGC  
TGCTCGCCGCTCTGAGTTGCTCCGTAAATTGACCGAAACGTTCCGGCTCGTGGTATCAGCCTAAAGGTGGCACTGAGA  
TGTTCTGCCATCCGCGAACAGGTAAGCCACTACCTAAATACCCTCGCATTAAAGACACCTAAAGTTGGTGGTATCTTT  
AAGAAGCCTAAGAACAAGGCACAGCGAGAAGGCCGTTGAGCCTTGCGAACTTGATACCCGCGAGTACGTTGCTGGTGC  
TCCTTACACCCCAGTTGAACATGTTGTGTTAACCCTTCTGCTCGTGACCACATTGAGAAGAACTCCAAGAGGCTG  
GGTGGGTCCCAGCAAGTACACCGATAAGGGTGTCTCTGTTGGTGGACGATGAGGTAAGGAGTACGTTGATGAT  
GACCCTGAGAAGCAAGCCGCTATCGACCTCATTAAAGAGTACTTGTATGATTGAGAAGCGAATCGGACAGTCTGCTGA  
GGGAGACAAAGCATGGCTTTCGTTATGTTGCTGAGGATGGTAAGATTGATGGTTCTGTTAACCCCTAATGGAGCAGTTA  
CGGGTTCGTGCGACCCATGCGTTCCCAAACCTTGCAGCAATTCGGGTGTACGTTCTCCTTATGGAGAGCAGTGTGCG  
GCTGCTTTTGGCGCTGAGCACCATTGGATGGGATAACTGGTAAGCCTTGGGTTTCCGGCTGGCATCGACGCATCCGG  
TCTTGAGCTACGCTGCTTGGCTCACTTTCATGGCTCGCTTGTATAACGGCGAGTACGCTCACGAGATTCTTAACGGCG  
ACATCCACACTAAGAACCAGATAGCTGCTGAACACTACCCGAGATAACGCTAAGACGTTTATCTATGGGTTCCCTC  
TATGTTGCTGGTGTGATGAGAAGATTGGACAGATTGTTGGTGTGCTGAGTAAAGAGCGCGGTAAGGAACTCAAGAAGAAAT  
CCTTGGAAACACCCCGCGATTGCAGCACTCCGCGAGTCTTCCAACAGACACTTGTGAGTCTCTCAATGGGTAG  
CTGGTGAGCAACAAGTCAAGTGGAAACGCCGCTGGATTAAAGGTCTGGATGGTTCGTAAGGTACACGTTTCGTAGTCT  
CACGCTGCCTTGAATACCCTACTGCAATCTGCTGGTGTCTCATCTGCAAACGTGGGATTATCAAGACCGAAGAGAT  
GCTCGTAGAGAAAGGCTTGAAGCATGGCTGGGATGGGGACTTTGCGTACATGGCATGGGTACATGATGAAATCCAAG  
TAGGCTGCCGTACCGAAGAGATTGCTCAGGTGGTCATTGAGACCGCACAAAGAAGCGATGCGCTGGGTTGGAGACCAC  
TGGAACCTCCGGTGTCTTCTGGATACCGAAGGTAAGATGGGTCTAATTGGGCGATTTGCCACTGATACAGGAGGCT  
ACTCATGAACGAAAGACACTTAACAGGTGCTGCTTCTGAAATGCTAGTAGCCTACAAATTTACCAAAGCTGGGTACA  
CTGTCTATTACCCTATGCTGACTCAGAGTAAAGAGGACTTGGTTGTATGTAAGGATGGTAAATTTAGTAAGGTTTCAG  
GTTAAAACAGCCACAACGGTTCAAACCAACACAGGAGATGCCAAGCAGGTTAGGCTAGGTGGATGCGGTAGGTCCGA  
ATATAAGGATGGAGACTTTGACATTCTTGCGGTTGTGGTTGACGAAGATGTGCTTATTTTTCATGAGGACGAAGTAA  
AAGGTAAGACATCCATGTGTGTCGGCAAGAGAAACAAAGGCATAAAACTATAGGAGAAATTTATGAGGCTATGACAA  
AGAAATTTAAAGTGTCTTTCGACGTTACCGCAAAGATGTGCTGCTGACGTTTCCAGGCAATCTTAGAGAAAGATATGCTG  
CATCTATGTAAGCAGGTCCGGCTCAGGTGCGATTGTCCCAATGGTAAACAGAAGGAAATGATTGTCCAGTTTCTGAC  
ACACGGTATGGAAGGATTGATGACATTTCGTAGTACGTACATCATTTCGTGAGGCCATTAAGGACATGCACGAAGAGT  
ATGCAGATAAGGACTCTTTCAAACAATCTCCTGCAACAGTACGGGAGGTGTTCTGATGTCTGACTACCTGAAAGTGC  
TGCAAGCAATCAAAGTTGCCCTAAGACTTCCAGTCCAACATATGTACGGAACAATGCGAGCCTCGTAGCGGAGGCC  
GCTTCCCGTGGTCACATCTCGTGCCTGACTACTAGTGGACGTAACGGTGGCGCTTGGGAAATCACTGCTTCCGGTAC  
TCGCTTTCTGAAACGAATGGGAGGATGTGTCTAATGTCTCGTGACCTTGTGACTATTCCACGCGATGTGTGGAACGA  
TATACAGGGCTACATCGACTCTCTGGAACGTGAGAACGATAGCCTTAAAGAACTAACTAATGGAAGCTGACGAATACG  
TAGCGGAACTAGAGGAGAACTTAATGGCACTTCTTACCTTAAACAATTTCTATGAGTTACGTGAAGGCTGCGACGA  
CAAGGGTATCCTTGTGATGGACGGCGACTGGCTGGTCTTCCAAGCTATGAGTGTGCTGAGTTTGTATGCTCTTGGG  
AGGAAGAGATTTGGCACCGATGCTGTGACCACGCTAAGGCCCGTACGATTCTTGAGGATTCCATTAAGTCTTACGAG  
ACCCGTAAGAAGGCTTGGGCAGGTGCTCCAATTGTCTTGGCTTACCGATAGTGTAACTGGCGTAAAGAAGTGGT  
TGACCCGAACTATAAGGCTAACCCTAAGGCCGTGAAGAAACCTGTAGGGTACTTTGAGTTCTTGTATGCTCTCTTTG  
AGCGCGAAGAGTTCTATTGCATCCGTGAGCCTATGCTTGGAGGTGATGACGTTATGGGAGTTATTGCTTCCAATCCG  
TCTGCCTTCCGGTGTCTGTAAGGCTGTAATCATCTCTTGGGATAAGGACTTTAAGACCATCCCTAACTGTGACTTCT  
GTGGTGTACCCTGGTAACATCCTGACTCAGACCGAAGAGTCCGCTGACTGGTGGCACCTTCTCCAGACCATCAAGG  
GTGACATCACTGATGGTTACTCAGGGATTGCTGGATGGGGTGATACCGCCGAGGACTTCTTGAATAACCCGTTTATA

ACCGAGCCTAAAACGTCTGTGCTTAAGTCCGGTAAGAACAAAGGCCAAGAGGTTACTAAATGGGTTAAACGCGACCC  
TGAGCCTCATGAGACGCTTTGGGACTGCATTAAGTCCATTGGCGCGAAGGCTGGTATGACCGAAGAGGATATTATCA  
AGCAGGGCCAAATGGCTCGAATCCTACGGTTCAACGAGTACAACCTTTATTGACAAGGAGATTTACCTGTGGAGACCG  
TAGCGTATATTGGTCTGGGTCTTTGTGTTCTCGGAGTGTGCCTCATTTTCGTGGGGCCTTTGGGACTTAGCCAGAATA  
ATCAAGTCGTTACACGACACTAAGTGATAAACTCAAGGTCCCTAAATTAATACGACTCACTATAGGGGAGATAGGGGC  
CTTTACGATTATTACTTTAAGATTTAACTCTAAGAGGAATCTTTATTATGTTAACACCTATTAACCAATTACTTAAG  
AACCTAACGATATTCCAGATGTACCTCGTGCAACCGCTGAGTATCTACAGGTTTCGATTCAACTATGCGTACCTCGA  
AGCGTCTGGTCATATAGGACTTATGCGTGCTAATGGTTGTAGTGAGGCCACATCTTGGGTTTCATTACAGGGCCTAC  
AGTATGCCTCTAACGTCATTGACGAGATTGAGTTACGCAAGGAACAACCTAAGAGATGATGGGGAGGATTGACACTAT  
GTGTTTCTCACCAGAAAATAAAACCTCCGAAGATGGATAACCAATCAGATTCGAGCCGTTGAGCCAGCGCCTCTGACCC  
AGAAGTGTCAAGCGTGGAGTTTCGGTGGGTCTTCTGATGAGACGGATACCAGGGCACCAGAGTGTCTGGACGCAAA  
GGCCTCAAGGTCGAACGTGATGATTCCGTAGCGAAGTCTAAAGCCAGCGGCAATGGCTCCGCTCGTATGAAATCTTC  
CATCCGTAAGTCCGCATTTGGAGGTAAGAAGTGATGTCTGAGTTCACATGTGTGGAGGCTAAGAGTCGCTTCCGTGC  
AATCCGGTGGACTGTGGAACACCTTGGGTTGCCTAAAGGATTTCGAAGGACACTTTGTGGGCTACAGCCTCTACGTAG  
ACGAAGTGATGGACATGTCTGGTTGCCGTGAAGAGTACATTCTGGACTCTACCGGAAAACATGTAGCGTACTTCCGCG  
TGGTGCCTAAGCTGTGACATTCACCACAAAGGAGACATTCTGGATGTAACGTCCGTTGTCATTAATCCTGAGGCAGA  
CTCTAAGGGCTTACAGCGATTCTAGCGAAACGCTTTAAGTACCTTGCAGAACTCCACGATTGCGATTGGGTGTCTC  
GTTGTAAGCATGAAGGCGAGACAATGCGTGTATACTTTAAGGAGGTATAAGTTATGGGTAAGAAAGTTAAGAAGGCC  
GTGAAGAAAGTCACCAAGTCCGTTAAGAAAGTCGTTAAGGAAGGGGCTCGTCCGTTAAACAGGTTGCTGGCGGTCT  
AGCTGGTCTGGCTGGTGGTACTGGTGAAGCACAGATGGTGAAGTACCACAAGCTGCCGCACAGATTGTTGACGTAC  
CTGAGAAAGAGGTTTCCACTGAGGACGAAGCACAGACAGAAAGCGGACGCAAGAAAGCTCGTGTGGCGGTAAGAAA  
TCCTTGAGTGTAGCCCGTAGCTCCGGTGGCGGTATCAACATTTAATCAGGAGGTTATCGTGGAAGACTGCATTGAAT  
GGACCGGAGGTGTCAACTCTAAGGGTTATGGTCGTAAGTGGGTTAATGGTAAACTTGTGACTCCACATAGGCACATC  
TATGAGGAGACATATGGTCCAGTTCCAAACAGGAATTGTGGTGATGCATATCTGCGATAACCCCTAGGTGCTATAACAT  
AAAGCACCTTACGCTTGGAACTCCAAAGGATAATTCCGAGGACATGGTTACCAAAGGTAGACAGGCTAAAGGAGAGG  
AACTAAGCAAGAACTTACAGAGTCAGACGTTCTCGCTATACGCTCTTCAACCTTAAGCCACCGCTCCTTAGGAGAA  
CTGTATGGAGTCAGTCAATCAACCATAACGCGAATACTACAGCGTAAGACATGGAGACACATTTAATGGCTGAGAAA  
CGAACAGGACTTGCAGGAGGATGGCGCAAAGTCTGTCTATGAGCGTTTTAAGAACGACCGGTCTCCCTATGAGACACG  
CGCTCAGAATTGCGCTCAATATACCATCCCATTGTTCCCTAAGGACTCCGATAACCGCTCTACAGATTATCAAAA  
CTCCGTGGCAAGCCGTGGGCGCTCGTGGTCTGAACAATCTAGCCTTAAGCTCATGCTGGCTCTATTCCCTATGCAG  
ACTTGGATGCGACTTACTATATCTGAATATGAAGCAAAGCAGTTACTGAGCGACCCCGATGGACTCGCTAAGGTCTGA  
TGAGGGCCTCTCGATGGTAGAGCGTATCATCATGAACTACATTGAGTCTAACAGTTACCGCGTACTCTCTTTGAGG  
CTCTCAAACAGTTAGTCGTAGCTGGTAACGTCCTGCTGTACCTACCGGAACCGGAAGGGTCAAACCTATAATCCCATG  
AAGCTGTACCGATTGTCTTCTTATGTGGTCCAACGAGACGCATTCGGCAACGTTCTGCAAATGGTGACTCGTGACCA  
GATAGCTTTTGGTGCTCTCCCTGAGGACATCCGTAAGGCTGTAGAAGGTCAAGGTGGTGAGAAGAAAGCTGATGAGA  
CAATCGACGTGTACACTCACATCTATCTGGATGAGGACTCAGGTGAATACCTCCGATACGAAGAGGTGAGGGTATG  
GAAGTCCAAGGCTCCGATGGGACTTATCCTAAAGAGGCTTGCCCATACATCCCGATTCCGATGGTCAGACTAGATGG  
TGAATCCTACGGTCTTTCGTACATTGAGGAATACTTAGGTGACTTACGGTCCCTTGAAAATCTCCAAGAGGCTATCG  
TCAAGATGTCCATGATTAGCTCTAAGGTTATCGGCTTAGTGAATCCTGCTGGTATCACCCAGCCACGCCGACTGACC  
AAAGCTCAGACTGGTGACTTCGTTACTGGTCTCCAGAAGACATCTCGTTCCTCCAAGTGGAGAAGCAAGCAGACTT  
TACTGTAGCTAAAGCCGTAAGTGACGCTATCGAGGCTCGCCTTTTCGTTTGCCTTTATGTTGAACTCTGCGGTTTACG  
GTACAGGTGAACGTGTGACCGCCGAAGAGATTCCGGTATGTAGCTTCTGAACTTGAAGATACTTTAGGTGGTGTCTAC  
TCTATCCTTTCTCAAGAATTACAATTGCCTCTGGTACGAGTGTCTTGAAGCAACTACAAGCCACGCAACAGATTCC  
TGAGTTACCTAAGGAAGCCGTAGAGCCAACCATTAGTACAGGTCTGGAAGCAATTGGTCGAGGACAAGACCTTGATA  
AGCTGGAGCGGTGTGTCACTGCGTGGGCTGCACTGGCACCTATGCGGGACGACCCTGATATTAACCTTGCATGATT  
AAGTATACGATTGCCAACGCTATCGGTATTGACACTTCTGGTATTCTACTCACCGAAGAACAGAAGCAACAGAAGAT  
GGCCCAACAGTCTATGCAAATGGGTATGGATAATGGTGTCTGTGCGCTGGCTCAAGGTATGGCTGCACAAGCTACAG  
CTTACCTGAGGCTATGGCTGCTGCCGCTGATTCCGTAGGTTTACAGCCGGAATTTAATACGACTCACTATAGGGA  
GACCTCATCTTTGAAATGAGCGATGACAAGAGGTTGGAGTCTCGGTCTTCTGTAGTTCAACTTTAAGGAGACAAT  
AATAATGGCTGAATCTAATGCAGACGTATATGCATCTTTTGGCGTGAACCTCCGCTGTGATGTCTGGTGGTTCCGTTG  
AGGAACATGAGCAGAACATGCTGGCTCTTGATGTTGCTGCCCGTGTATGGCGATGATGCAATCGAGTTAGCGTCAGAC  
GAAGTGGAAACAGAACGTGACCTGTATGACAACCTCTGACCCGTTCCGGTCAAGAGGATGACGAAGGCCGATTCAGGT  
TCGTATCCGGTGTATGGCTCTGAGCCGACCGATGTGGACACTGGAGAAGAAGGCGTTGAGGGCACCGAAGGTTCCGAAG  
AGTTTACCCCACTGGGCGAGACTCCAGAAGAAGTGGTAGCTGCCTCTGAGCAACTTGGTGAGCACGAAGAGGGCTTC  
CAAGAGATGATTAACATTGCTGCTGAGCGTGGCATGAGTGTGAGACCATGAGGCTATCCAGCGTGAGTACGAGGA  
GAACGAAGAGTTGTCCGCCGAGTCCACGCTAAGCTGGCTGAAATTTGGCTACACGAAGGCTTTTCATTGACTCGTATA  
TCCGTGGTCAAGAAGCTCTGGTGGAGCAGTACGTAACAGTGTCTATTGAGTACGCTGGTGGTCTGTAACGTTTTGAT

GC ACTGTATAACCACCTTGAGACGCACAACCCTGAGGCTGCACAGTCGCTGGATAATGCGTTGACCAATCGTGATTT  
AGCGACCGTTAAGGCTATCATCAACTTGGCTGGTGGAGTCTCGCGCTAAGGCGTTCGGTCGTAAGCCAACCTCGTAGTG  
TGACTAATCGTGCTATTCCGGCTAAACCTCAGGCTACCAAGCGTGAAGGCTTTGCGGACCGTAGCGAGATGATTAAA  
GCTATGAGTGACCCTCGGTATCGCACAGATGCCAACTATCGTCGTCAAGTCGAACAGAAAGTAATCGATTCGAACTT  
CTGATAGACTTCGAAATTAATACGACTCACTATAGGGGAGACCACAACGGTTTTCCCCCTAGAAATAATTTTTGTTTAA  
TTTAAAGAAGGAGATATACATATGGCTAGCATGACTGGTGGACAGCAAATGGGTACTAACCAGGTAAAGGTGTAGTT  
GCTGCTGGAGATAAACTGGCGTTGTTCTTGAAGGTATTTGGCGGTGAAGTCCTGACTGCGTTCGCTCGTACCTCCGT  
GACCACTTCTCGCCACATGGTACGTTCCATCTCCAGCGGTAAATCCGCTCAGTTCCTGTTCTGGGTGCGACTCAGG  
CAGCGTATCTGGCTCCGGGCGGAGAACCCTCGACGATAAACGTAAGGACATCAAACACACCCGAGAAGGTAATCACCATT  
GACGGTCTCCTGACGGCTGACGTTCTGATTTATGATATTGAGGACGCGATGAACCCTACGACGTTCCGCTGTAGTA  
TACCTCTCAGTTGGGTGAATCTCTGGCGATGGCTGCGGATGGTGCGGTTCTGGCTGAGATTGCCGGTCTGTGTAAACG  
TGAAAGCAAATATAATGAGAACATCGAGGGCTTAGGTACTGCTACCGTAATTGAGACCACTCAGAACAAGGCCGCA  
CTTACCACCAAGTTGCGCTGGGTAAGGAGATTATTGCGGCTCTGACTAAGGCTCGTGCGGCTCTGACCAAGAACTA  
TGTTCCGGCTGCTGACCGTGTGTTCTACTGTGACCCAGATAGCTACTCTGCGATTCTGGCAGCACTGATGCCGAACG  
CAGCAAACCTACGCTGCTCTGATTGACCCTGAGAAGGGTCTATCCGCAACGTTATGGGCTTTGAGGTTGTAGAAGTT  
CCGCACCTCACCGCTGGTGGTGTGGTACCCTCGTGAGGGCACTACTGGTCAGAAGCACGCTTCCCTGCCAATAA  
AGGTGAGGGTAATGTCAAGGTTGCTAAGGACAACGTTATCGGCCTGTTTCATGCACCGCTCTGCGGTAGGTACTGTTA  
AGCTGCGTGACTTGGCTCTGGAGCGCGCTCGCCGTGCTAACTTCCAAGCGGACCAGATTATCGCTAAGTACGCAATG  
GGCCACGGTGGTCTTCGCCCAGAAGCTGCAGGAGCTGTGCTATTCCAGTCAGGTGTGATGCTCGGGGATCCGAATTC  
GAGCTCCGTCTAATACGACTCACTATAGCTAAACATTAATCATTTAAAATAAGGAGGTAAAGCATGAAATATCTTCT  
GCCTACGGCTGCCACGGGTTTTGTTACTGCTTGCAGCTCAGCCAGCGGTGCGCATGGTATTACACTGGAGGATTTTG  
TCGGTGACTGGCGCCAGACTGCTGGATATAATCTTGATCAAGTGCTGGAGCAAGGAGGCGTCTCAAGCCTTTTCCAG  
AATTTAGGTGTTAGCGTCACACCGATTCAACGTATCGTGCTGAGTGGGGAGAACGGCTTAAAAATCGACATCCACGT  
CATCATTCCATATGAAGGGTTGTCAGGGGATCAGATGGGTGAGATTGAAAAGATTTTTAAGGTTGTCTACCCAGTAG  
ACGACCATCACTTCAAGGTTATTTTACACTACGGTACATTAGTAATTGACGGCGTGACTCCTAACATGATTGACTAT  
TTTGGACGCCCCGATGAGGGGATTGCAGTGTTCGACGGCAAGAAGATCACAGTTACGGGGACTCTGTGGAATGGGAA  
TAAAATTATCGACGAGCGTCTGATTAACCCCGATGGCTCTCTGTTGTTCCGTGTCACTATTAACGGTGTACGGGCT  
GGCGCCTTTGTGACAGCATTTTAGCAGGCTCGAGCGGCCCTACGTGAGTCCGGCCGGTTCGCAAGTTTTATGGGGG  
GTCAACCAAGTGAACACAGGCTTTACGGCGAACGTTACTGTCAAGAACAACAAGCTCCGCTCCTGTGGATGGTTGGAC  
ACTGACCTTTTTCTTTCCCTCAGGTGACCAAGTGCAGGCGGTGGAGTTCTACGGTTACCAATCTGGTTCTGCTG  
TTACTGTCCGTAACGCGCCCTGGAATGGAAGCATCCCAGCGGGCGGGACCACAGTTTTGGCTTCAATGGCTCTCAT  
ACAGGGACAACGCAGCACCAACAGCATTTTTCTTGAATGGAACCCCTTGCACTGTGCGATAAGCTTGCGGCCGCAC  
TCGAGTAAGTGTAAACCCCTTGGGGCCTCTAAACGGGTCTTGAGGGGTTTTTTGCTGAAAGGAGGAACTATATGCG  
CTCATAAGATATGAACGTTGAGACTGCCGCTGAGTTATCAGCTGTGAACGACATTCTGGCGTCTATCGGTGAACCTC  
CGGTATCAACGCTGGAAGGTGACGCTAACGCAGATGCAGCGAACGCTCGGCGTATTCTCAACAAGATTAACCGACAG  
ATTCATCTCGTGGATGGACGTTCAACATTGAGGAAGGCATAACGCTACTACCTGATGTTTACTCCAACCTGATTGT  
ATACAGTGACGACTATTTATCCCTAATGTCTACTTCCGGTCAATCCATCTACGTTAACCGAGGTGGCTATGTGTATG  
ACCGAACGAGTCAATCAGACCGCTTTGACTCTGGTATTACTGTGAACATTATTCTGCTCTCCGCGACTACGATGAGATG  
CCTGAGTGCTTCCGTTACTGGATTGTACCAAGGCTTCCCGTCAAGTCAACAACCGATTCTTTGGGGCACCGGAAGT  
AGAGGGTGTACTCCAAGAAGAGGAAGATGAGGCTAGACGCTCTGTCATGGAGTATGAGATGGACTACGGTGGGTACA  
ATATGCTGGATGGAGATGCGTTCACTTCTGGTCTACTGACTCGCTAACATTAATAAATAAGGAGGCTCTAATGGCAC  
TCATTAGCCAATCAATCAAGAACTTGAAGGGTGGTATCAGCCAACAGCCTGACATCCTTCCGTTATCCAGACCAAGGG  
TCACGCCAAGTTAACGGTTGGTCTTCCGAGACCGAGGGCCTCCAAAAGCGTCCACCTCTTGTTTTTCTTAAATACACT  
TGGAGACAACGGTGCCTTAGGTCAAGCTCCGTACATCCACCTGATTAACCGAGATGAGCACGAACAGTATTACGCTG  
TGTTCACTGGTAGCGGAATCCGAGTGTTCGACCTTCTGGTAACGAGAAGCAAGTTAGGTATCCTAACGGTTCCAAC  
TACATCAAGACCGCTAATCCACGTAACGACCTGCGAATGGTACTGTAGCAGACTATAACGTTTCATCGTTAACCGTAA  
CGTTGTTGCACAGAAGAACAACAAGTCTGTCAACTTACCAGATTACAACCCCTAATCAAGACGGATTGATTAACGTTT  
GTGGTGGTCAAGTATGGTAGGGAACATAATTGTACACATTAACGGTAAAGACGTTGCGAAGTATAAGATACCAGATGGT  
AGTCAACCTGAACACGTAACAATACGGATGCCAATGGTTAGCTGAAGAGTTAGCCAAGCAGATGCGCACTAACTT  
GTCTGATTGGACTGTAAATGTAGGGCAAGGGTTCATCCATGTGACCGCACCTAGTGGTCAACAGATTGACTCCTTCA  
CGACTAAAGATGGCTACGCAGACAGTTGATTAACCCCTGTGACCCACTACGCTCAGTCTGTTCTCTAAGCTGCCACCT  
AATGCTCCTAACGGCTACATGGTGAATAATCGTAGGGGACGCTCTAAGTCTGCCGACCAGTATTACGTTCCGGTATGA  
CGCTGAGCGGAAAGTTTGGACTGAGACTTTAGGTTGGAACACTGAGGACCAAGTTCTATGGGAAACCATGCCACACG  
CTCTTGTGCGAGCCGCTGACGGTAATTTGACTTCAAGTGGCTTGGAGTGGTCTCCTAAGTCTTGTGGTACGTTGAC  
ACCAACCCCTTGGCCTTCTTTTTGTTGGTTCAAGTATTAACGATGTGTTCTTCTCCGTAACCGCTTAGGATTCCTTAG  
TGGGGAGAACATCATATTGAGTCGTACAGCCAAATACTTCAACTTCTACCCTGCGTCCATTGCGAACCTTAGTGATG  
ACGACCCTATAGACGTAGCTGTGAGTACCAACCGAATAGCAATCCTTAAGTACGCCGTTCCGTTCTCAGAAGAGTTA

CTCATCTGGTCCGATGAAGCACAAATTCGTCCTGACTGCCTCGGGTACTCTCACATCTAAGTCGGTTGAGTTGAACCT  
AACGACCCAGTTTGGACGTACAGGACCGAGCGAGACCTTTTGGGATTGGGCGTAATGTCTACTTTGCTAGTCCGAGGT  
CCAGCTTACAGTCCATCCACAGGTACTACGCTGTGCAGGATGTCAGTTCGGTTAAGAATGCTGAGGACATTACATCA  
CACGTTCCCTAACTACATCCCTAATGGTGTGTTGAGTATTTGCGGAAGTGGTACGGAAAACCTTCTGTTCCGGTACTATC  
TCACGGGGACCCCTAGTAAAATCTTTCATGTACAAATTCCTGTACCTGAACGAAGAGTTAAGACAACAGTCGTGGTCTC  
ATTGGGACTTTGGGGAAAACGTACAGGTTCTAGCTTGTGAGAGTATCAGCTCAGATATGTATGTGATTCTTCCGAAT  
GAGTTCAATACGTTCCCTAGCTAGAATCTCTTTCACTAAGAACGCCATTGACTTACAGGGGAGAACCCTATCGTGCCTT  
TATGGACATGAAGATTCGATACACGATTCCCTAGTGGAAACATAACAACGATGACACATTCACTACCTCTATTTCATATTC  
CAACAATTTATGGTGCAAACCTTCGGGAGGGGGCAAATCACTGTATTGGAGCCTGATGGTAAGATAAACCGTGTGTTGAG  
CAACCTACGGCTGGGTGGAATAGCGACCCTTGGCTGAGACTCAGCGGTAACCTGGAGGGACGCTGGTGTACATTTGG  
GTTCAACATTAACCTTCGTATATGAGTTCTCTAAGTTCTCATCAAGCAGACTGCCGACGACGGGTCTACCTCCACGG  
AAGACATTTGGGCGCTTACAGTTACGCCGAGCGTGGGTTAACTACGAGAACTCTGGTACGTTTGCATTTATGTTGAG  
AACCAATCGTCTAACTGGAAGTACACAATGGCTGGTGCCCGATTAGGCTCTAACACTCTGAGGGCTGGGAGACTGAA  
CTTAGGGACCCGACAATATCGATTCCCTGTGGTTGGTAACGCCAAGTTCAACACTGTATACATCTTGTGAGATGAGA  
CTACCCCTCTGAACATCATTGGGTGTGGCTGGGAAGGTAACACTTACGGAGAAGTTCCGGTATTTAATTAATTAAT  
CTCCCTGTGGTGGCTCGAAATTAATACGACTCACTATAGGGAGAACAATACGACTACGGGAGGGTTTTCTTATGATG  
ACTATAAGACCTACTAAAAGTACAGACTTTGAGGTATTCACTCCGGCTCACCATGACATTCTTGAAGCTAAGGCTGC  
TGGTATTGAGCCGAGTTTTCCCTGATGCTTCCGAGTGTGTACGTTGAGCCTCTATGGGTTCCCTCTAGCTATCGGTG  
GTAACCTGCGGGGACCAGTGTGTTTCGTTACGAGCGACCAAGTGTGGCGACTTAGTGGAAAGGCTAAGCGAAAGTTC  
CGTAAGTTAATCATGGAGTATCGCGATAAGATGCTTGAAGAATGATACTCTTTGGAATTACGTATGGGTAGGCAA  
TACGTCCACATTCGTTTCTCAAGACTATCGGTGCGGTATTCCATGAAGAGTACACACGAGATGGTCAATTTTCAGT  
TATTTACAATCACGAAAGGAGGATAAACCATATGTGTTGGGCGCCGCAATACCTATCGCTATATCTGGCGCTCAGGC  
TATCAGTGGTCAGAACGCTCAGGCCAAAATGATTGCCGCTCAGACCGCTGCTGGTCTGCTCAAGCTATGGAAATCA  
TGAGGCAGACGAACATCCAGAATGCTGACCTATCGTTGCAAGCTCGAAGTAAACTTGAGGAAGCGTCCGCCGAGTTG  
ACCTCACAGAACATGCAGAAGGTCCAAGCTATTGGGTCTATCCGAGCGGCTATCGGAGAGAGTATGCTTGAAGGTTT  
CTCAATGGACCGCATTAAAGCGAGTACAGAAGGACAGTTTATTCCGGGAAGCCAATATGGTAACTGAGAACTATCGCC  
GTGACTACCAAGCAATCTTCGCACAGCAACTTGGTGGTACTCAAAGTGTGCAAGTCAGATTGACGAAATCTATAAG  
AGCGAACAAGAAACAGAAGAGTAAGCTACAGATGGTCTTGACCCTATCATGGGGTCTCCGCTCGCGAGTGC  
TTACGCATCCGGTGCCTTCGACTCTAAGTCCACAACCTAAGGCACCTATTGTTGCCGCTAAAGGAACCAAGACGGGGA  
GGTAATGAGCTATGAGTAAAATTGAATCTGCCCTTCAAGCGGCACAACCGGGACTCTCTCGGTTACGTGGTGGTGT  
GGAGGTATGGGCTATCGTGCAGCAACCCTCAGGCCGAACAGCCAAGGTCAAGCCTATTGGACACCATTGGTTCGGTT  
CGCTAAGGCTGGTGCCGATATGTATACCGCTAAGGAACAACGAGCACGAGACCTAGCTGATGAACGCTCTAACGAGA  
TTATCCGTAAGCTGACCCCTGAGCAACGTCGAGAAGCTCTCAACAACGGGACCCCTTCTGTATCAGGATGACCCATAC  
GCTATGGAAGCACTCCGAGTCAAGACTGGTTCGTAACGCTGCGTATCTTGTGGACGATGACGTTATGCAGAAGATAAA  
AGAGGGTGTCTTCCGTAAGTACTCGCGAAGAGATGGAAGAGTATCGCCATAGTGCCTTCAAGAGGGCGCTAAGGTATACG  
CTGAGCAGTTCGGCATCGACCCTGAGGACGTTGATTATCAGCGTGGTTTTCAACGGGGACATTACCGAGCGTAACATC  
TCGCTGTATGGTGCATGATAACTTCTTGGCCAGCAAGCTCAGAAGGGCGCTATCATGAACAGCCGAGTGGAACT  
CAACGGTGTCTTCAAGACCCTGATATGCTGCGTCCGACTCTGCTGACTTCTTTGAGAAGTATATCGACAACG  
GTCTGGTTACTGGCGCAATCCCCTGATGCTCAAGCCACACAGCTTATAAGCCAAGCGTTTCAGTGACGCTTCTAGC  
CGTGCTGGTGGTGTGACTTCTGATGCGAGTCCGGTACAAGAAGGTAACACTTAACGGAGCCACTACGACTTACCG  
AGAGTTGATTGGTGAGGAACAGTGGAAACGCTCTCATGGTACAGCACAAAGTTCAGTTTGGAGACTGACGCGAAGC  
TGAACGAGCAGTATCGCTTGAAGATTAACCTCTGCGCTGAACCAAGAGGACCCAAAGGACAGCTTGGGAGATGCTTCAA  
GGTATCAAGGCTGAACTAGATAAGGTCCAACCTGATGAGCAGATGACACCACAACGTGAGTGGCTAATCTCCGCACA  
GGAACAAGTTCAGAATCAGATGAACGCATGGACGAAAGCTCAGGCCAAGGCTCTGGACGATTCCATGAAGTCAATGA  
ACAAACTTGACGTAATCGACAAGCAATCCAGAAGCGAATCAACGGTGGTGGTCTCAACGGATTTTAAGGATATG  
CCAGTCAACGAGAACACTGGTGGTCAAGCATAGCGATATGGTTAACTACGCCAATAAGAAGCTCGCTGAGATTGA  
CAGTATGGACATTCAGACGGTCCCAAGGATGCTATGAAGTTGAAGTACCTTCAAGCGGACTCTAAGGACGGAGCAT  
TCCGTACAGCCATCGAAACCATGGTCACTGACGCTGGTCAAGAGTGGTCTGCCGCTGTGATTAACGGTAAGTTACCA  
GAACGAACCCAGCTATGGATGCTCTGCGCAGAATCCGCAATGCTGACCCTCAGTTGATTGCTGCGCTATAACCCAGA  
CCAAGCTGAGCTATTCCCTGACGATGGACATGATGGACAAGCAGGGTATTGACCCTCAGGTTATTCTTGTGATGCCGACC  
GACTGACTGTTAAGCGGTCCAAAGAGCAACGCTTTGAGGATGATAAAGCATTTCGAGTCTGCACTGAATGCATCTAAG  
GCTCCTGAGATTGCCCGTATGCCAGCGTCACTGCGCGAATCTGCACGTAAGATTTATGACTCCGTTAAGTATCGCTC  
GGGGAACGAAAGCATGGCTATGGAGCAGATGACCAAGTTTCTTAAAGGAATCTACCTACACGTTCACTGGTGTATGATG  
TTGACGGTGTATACCGTTGGTGTGATTCTTAAGAATATGATGCAGGTTAACTCTGACCCGAAATCATGGGAGCAAGGT  
CGGGATATTCTGGAGGAAGCACGTAAGGGAATCATTGCGAGCAACCCTTGATAACCAATAAGCAACTGACCATGTA  
TTCTCAAGGTGACTCCATTTACCTTATGGACACCACAGGTCAAGTCAGAGTCCGATACGACAAAGAGTTACTCTCGA  
AGGTCTGGAGTGAGAACCAGAAGAACTCGAAGAGAAAGCTCGTGAGAAGGCTCTGGCTGATGTGAACAAGCGAGCA

CCTATAGTTGCCGCTACGAAGGCCCGTGAAGCTGCTGCTAAACGAGTCCGAGAGAAACGTAAACAGACTCCTAAGTT  
CATCTACGGACGTAAGGAGTAACTAAAGGCTACATAAGGAGGCCCTAAATGGATAAGTACGATAAGAACGTACCAAG  
TGATTATGATGGTCTGTTCCAAAAGGCTGCTGATGCCAACGGGGTCTCTTATGACCTTTTACGTAAAGTCGCTTGGA  
CAGAATCACGATTTGTGCCTACAGCAAAATCTAAGACTGGACCATTAGGCATGATGCAATTTACCAAGGCAACCGCT  
AAGGCCCTCGGTCTGCGAGTTACCGATGGTCCAGACGACGACCGACTGAACCCTGAGTTAGCTATTAATGCTGCCGC  
TAAGCAACTTGCAGGTCTGGTAGGGAAGTTTGATGGCGATGAACTCAAAGCTGCCCTTGCGTACAACCAAGGCGAGG  
GACGCTTGGGTAATCCACAACCTTGAGGCGTACTCTAAGGGAGACTTCGCATCAATCTCTGAGGAGGGACGTAACCTAC  
ATGCGTAACCTTCTGGATGTTGCTAAGTCACCTATGGCTGGACAGTTGGAAACTTTTGGTGGCATAACCCCAAAGGG  
TAAAGGCATTCGGGCTGAGGTAGGATTGGCTGGAATTGGTCACAAGCAGAAAGTAACACAGGAACCTTCTGAGTCCA  
CAAGTTTTGACGTTAAGGGTATCGAACAGGAGGCTACGGCGAAACCATTGCGCAAGGACTTTTGGGAGACCCACGGA  
GAAACACTTGACGAGTACAACAGTCGTTCAACCTTCTCGGATTCAAAATGCTGCCGAAGCTGAACTCTCCAACCTC  
AGTCGCTGGGATGGCTTTCCGTGCTGGTCTCGATAATGGTTTTGATGTGTTTAAAGACACCATTACGCCGACTC  
GCTGGAACCTCACATCTGGACTCCAGAGGAGTTAGAGAAGATTGAAACAGAGGTTAAGAACCCTGCGTACATCAAC  
GTTGTAACCTGGTGGTTCCCTGAGAACCTCGATGACCTCATTAAATGGCTAACGAGAACCTTTGAGAATGACTCCCG  
CGCTGCCGAGGCTGGCCTAGGTGCCAACTGAGTGTGGTATTATTGGTGTGGTGTGGACCCGCTTAGCTATGTTT  
CTATGGTCCGTGCTACTGGTAAGGGCTTTAAGTTAATCAATAAGGCTCTTGTAGTTGGTGGCGAAAGTGTGCTCTG  
AACGTTGCATCCGAAGGTCTCCGTACCTCCGTAGCTGGTGGTACGACGACTATGCGGGTGTGCTTAGGTGGCTT  
TGTGTTTTGGCGCAGGCATGTCTGCAATCAGTGACGCTGTAGCTGCTGGACTGAAACGCAGTAAACCAGAAGCTGAGT  
TCGACAATGAGTTCATCGGTCTATGATGCGATTGGAAGCCCGTGAGACAGCACGAAACGCCAACTCTGCGGACCTC  
TCTCGGATGAACACTGAGAACATGAAGTTTGAAGGTGAACATAATGGTGTCCCTTATGAGGACTTACCAACAGAGAG  
AGGTGCCGTGGTGTACATGATGGCTCCGTTCTAAGTGCAAGCAACCCAATCAACCCTAAGACTCTAAAAGAGTTCT  
CCGAGGTTGACCCTGAGAAGGCTGCGCGAGGAATCAAACCTGGCTGGGTTTACCAGGATTGGCTTGAAGACCTTGGGG  
TCTGACGATGCTGACATCCGTAGAGTGGCTATCGACCTCGTTCGCTCTCCTACTGGTATGCAGTCTGGTGCCTCAGG  
TAAGTTCGGTGCAACAGCTTCTGACATCCATGAGAGACTTCTATGGTACTGACCAGCGTACTTATAATGACTTGTACA  
AAGCAATGTCTGACGCTATGAAAGACCCTGAGTTCCTACTGGCGGCGCTAAGATGTCCCGTGAAGAACTCGATAC  
ACTATCTACCGTAGAGCGGCACTAGCTATTGAGCGTCCAGAACTACAGAAGGCACACTCACTCCGTCTGAGAGAATCGT  
TATGGACATCATTAAAGCGTCACTTTGACACCAAGCGTGAACCTATGAAAAACCCAGCAATATTCGGTAACACAAAGG  
CTGTGAGTATCTCCCTGAGAGTCCGCCACAAAGGTACTTACGTTCTCACGTATATGACCGCTCATGCCAAGGCGCTG  
ATGATTCACACGCTACGGTCCGAAGGTTTGCAGGAAGGATTGCCCGCTCATGGATGAACAGTACGCTCTCCAGACC  
TGAGGTCAAGGCCAGAGTCGATGAGATGCTTAAGGAATTACACGGGGTGAAGGAAGTAACACCAGAGATGGTAGAGA  
AGTACGCTATGGATAAGGCTTATGGTATCTCCCACTCAGACCAGTTCACCAACAGTTCATAATAGAAGAGAACATT  
GAGGGCTTAGTAGGTATCGAGAATAACTCATTCCCTTGAAGCACGTAACCTGTTTTGATTCCGACCTATCCATCACTAT  
GCCAGACGGACAGCAATTCTCAGTGAATGACCTAAGGGACTTCGATATGTTCCGCATCATGCCAGCGTATGACCGCC  
GTGTCAATGGTGACATCGCCATCATGGGGTCTACTGGTAAAACCACTAAGGAACCTAAGGATGAGATTTTGGCTCTC  
AAAGCGAAAGCTGAGGGAGACGGTAAGAAGACTGGCGAGGTACATGCTTTAATGGATACCGTTAAGATTCTTACTGG  
TCGTGCTAGACGCAATCAGGACACTGTGTGGGAAACCTCACTGCGTGCCATCAATGACCTAGGGTCTTCCGCTAAGA  
ACGCCTACATGGGTGCTCAGAACATTACGGAGATTGCTGGGATGATTGTCACTGGTAACGTTTCGTGCTCTAGGGCAT  
GGTATCCCAATTCTGCGTGATACACTCTACAAGTCTAAACCAGTTTCAGCTAAGGAACCTAAGGAACCTCCATGCGTC  
TCTGTTCCGGAAGGAGGTGGACCAGTTGATTCCGCCTAAACGTGCTGACATTGTGCAGCGCCTAAGGGAAGCAACTG  
ATACCGGACCTGCCGTGGCGAACATCGTAGGGACCTTGAAGTATTCAACACAGGAACCTGGCTGCTCGCTCTCCGTGG  
ACTAAGCTACTGAACCGGAACCACTAACTACCTTCTGGATGCTGCGCGTCAAGGTATGCTTGGGGATGTTATTAGTGC  
CACCTAACAGGTAAGACTACCCGCTGGGAGAAAGAAGGCTTCCCTTCGTGGTGCCTCCGTAACCTCCTGAGCAGATGG  
CTGGCATCAAGTCTCTCATCAAGGAACATATGGTACGCGGTGAGGACGGGAAGTTTACCCTAAGGACAAGCAAGCG  
TTCTCTATGGACCCACGGGCTATGGACTTATGGAGACTGGCTGACAAGGTAGCTGATGAGGCAATGCTGCGTCCACA  
TAAGGTGTCTTACAGGATTCATGCGTTCGGAGCACTAGGTAAGATGGTTATGCAGTTTAAAGTCTTCTACTATCA  
AGTCCCTTAACTCTAAGTTCCTGCGAACCTTCTATGATGGATACAAGAACAACCGAGCGATTGACGCTGCGCTGAGC  
ATCATCACCTCTATGGGTCTCGCTGGTGGTTTTCTATGCTATGGCTGCACACGTCAAAGCATAACGCTCTGCCTAAGGA  
GAAACGTAAGGAGTACTTGGAGCGTGCCTGGACCCAAACCATGATTGCCACGCTGCGTTATCTCGTAGTTCTCAAT  
TGGGTGCTCCTTTGGCTATGGTTGACCTAGTTGGTGGTGTGTTTAGGGTTTCGAGTCTCCAAGATGGCTCGCTCTACG  
ATTCTACCTAAGGACACCGTGAAGGAACGTGACCCAAACAAACCGTACACCTCTAGAGAGGTAATGGGCGCTATGGG  
TTCAAACCTTCTGGAACAGATGCCTTCGGCTGGCTTTGTGGCTAACGTAGGGGCTACCTTAATGAATGCTGCTGGCG  
TGGTCAACTCACCTAATAAAGCAACCGAGCAGGACTTCATGACTGGTCTTATGAACTCCACAAAAGAGTTAGTACCG  
AACGACCCATTGACTCAACAGCTTGTGTTGAAGATTTATGAGGCGAACGGTGTAACTTGAAGGAGCGTAGGAAATA  
ATACGACTCACTATAGGGAGAGGCGAAATAATCTTCTCCCTGTAGTCTCTTAGATTTACTTTAAGGAGGTCAAATGG  
CTAACGTAATTTAAACCGTTTTGACTTACCAGTTAGATGGCTCCAATCGTGATTTTAAATATCCCGTTTTGAGTATCTA  
GCCCCTAAGTTTCGTAGTGGTAACCTCTTATTGGTGTAGACCGAAAGGTCCTTACGATTAATACAGACTATCGCTTTGC  
TACACGTAATACTATCTCTGACAAAGGCTTGGGGTCCAGCCGATGGCTACACGACCATCGAGTTACGTCGAGTAA

CCTCCACTACCGACCGATTGGTTGACTTTACGGATGGTTCAATCCTCCGCGCGTATGACCTTAACGTCGCTCAGATT  
CAAACGATGCACGTAGCGGAAGAGGCCCGTGACCTCACTACGGATACTATCGGTGTCAATAACGATGGTCACTTGGA  
TGCTCGTGGTTCGTCGAATTTGTGAACCTAGCGAACGCCGTGGATGACCGCGATGCTGTTCCGTTTTGGTCAACTAAAGA  
CCATGAACCAGAACTCATGGCAAGCACGTAATGAAGCCTTACAGTTCGGTAATGAGGCTGAGACTTTCAGAAACCAA  
GCGGAGGGCTTTAAGAACGAGTCCAGTACCAACGCTACGAACACAAAGCAGTGGCAGCGATGAGACCAAGGGTTTTCCG  
AGACGAAGCCAAGCGGTTCAAGAATACGGCTGGTCAATACGCTACATCTGCTGGGAACTCTGCTTCCGCTGCGCATC  
AATCTGAGGTAACGCTGAGAACTCTGCCACAGCATCCGCTAACTCTGCTCATTGGCAGAACAGCAAGCAGACCGT  
GCGGAACGTGAGGCAGACAAGCTGGAAAATTACAATGGATTGGCTGGTGAATTGATAAGGTAGATGGAACCAATGT  
GTACTGGAAAGGAAATATTCACGCTAACGGGCGCCTTTACATGACCACAAACGGTTTTGACTGTGGCCAGTATCAAC  
AGTTCTTTGGTGGTGTCACTAATCGTTACTCTGTCTGATGGAGTGGGAGATGAGAACGGATGGCTAGTGTATGTTCAA  
CGTAGAGATGGACAACAGCATAGGCGGTAACATCCAGTTAGTAGTAAACGGACAGATCATCACCAAGTGGAGC  
CATGACCGGTGACTAAAATTCAGAATGGGCATGTTCTTCAATTAGAGTCCGCATCCGACAAGGCGCACTATATTC  
TATCTAAAGATGGTAACAGGAATAACTGGTACATTGGTAGAGGGTACAGATAACAACAATGACTGTACCTTCCACTCC  
TATGTACATGGTACGACCTTAACACTCAAGCAGGACTATGCAGTAGTTAACAAACACTTCCACGTAGGTGAGGCCGT  
TGTGGCCACTGATGGTAATATTCAAGGTAAGTGGGAGGTAATGGCTGGATGCTTACCTACGTGACAGCTTCG  
TTGCGAAGTCCAAGGCGTGGACTCAGGTGTGGTCTGGTAGTGCTGGCGGTGGGGTAAGTGTGACTGTTTTACAGGAT  
CTCCGCTTCCGCAATATCTGGATTAAGTGTGCCAACAACTCTTGGAACTTCTTCCGTAAGTGGCCCCGATGGAATCTA  
CTTCATAGCCTCTGATGGTGGATGGTTACGATTCCAAATACACTCCAACGGTCTCGGATTCAAGAATATTGCAGACA  
GTCGTTCAAGTACCTAATGCAATCATGGTGGAGAACGAGTAATTGGTAAATCACAAGGAAAGACGTGTAGTCCACGGA  
TGGACTCTCAAGGAGGTACAAGGTGCTATCATTAGACTTTAACAAACGAATTGATTAAGGCTGCTCCAATTGTTGGGA  
CGGGTGTAGCAGATGTTAGTGTGCTGACTGTTCTTTGGGTTAAGCCTTAACGAATGGTCTACGTTGCTGCTATCGCC  
TACACAGTGGTTGAGATTGGTGCCAAGGTAGTCGATAAGATGATTGACTGGAAGAAAGCCAATAAGGAGTGATATGT  
ATGGAAAAGGATAAGAGCCTTATTACATTCTTAGAGATGTTGGACACTGCGATGGCTCAGCGTATGCTTGGCGACCT  
TTCGGACCATGAGCGTCGCTCTCCGCAACTCTATAATGCTATTAACAACTGTTAGACCGCCACAAGTTCAGATTG  
GTAAGTTGCAGCCGGATGTTACATCTTAGGTGGCCTTGGTGGTCTTGAAGAGTACAAAGAGAAAGTCCGGTGAT  
AACGGTCTTACGGATGATGATATTTACACATTACAGTGTATACTCAAGGCCACTACAGATAGTGGTCTTTATGGAT  
GTCATTGTCTATACGAGATGCTCCTACGTGAAATCTGAAAGTTAACGGGAGGCATTATGCTAGAATTTTTACGTAAG  
CTAATCCCTTGGGTTCTCGCTGGGATGCTATTCCGGTTAGGATGGCATCTAGGGTCAGACTCAATGGACGCTAAATG  
GAAACAGGAGGTACCAATGAGTACGTTAAGAGAGTTGAGGCTGCGAAGAGCACTCAAAGACAATCGATGCGGTAT  
CTGCTAAGTATCAAGAAGACCTTGCCGCGCTGGAAGGGACACTGATAGGATTATTTCTGATTTGCGTAGCGCAAT  
AAGCGGTTGCGCGTCAGAGTCAAACTACCAGAACCTCCGATGGTCAGTGTGGATTTCGAGCCTGATGGTCGAGCCGA  
ACTTGACGACCGAGATGCTAAACGTATTCTCGCAGTGACCCAGAAGGGTGACGCATGGATTTCGTGCGTTACAGGATA  
CTATTTCGTGAAGTGAACGTAAGTAGGAAATCAAGTAAGGAGGCAATGTGTCTACTCAATCCAATCGTAATGCGCTC  
GTAGTGGCGCAACTGAAAGGAGACTTCGTGGCGTTTCTATTTCGTCTTATGGAAGGCGCTAAACCTACCAGTGGCCAC  
TAAGTGTGAGATTGACATGGCTAAGGTGCTGGCGAATGGAGACAACAAGAAGTTCATCTTACAGGCTTTCCGTGGTA  
TCGGTAAGTTCGTTTACATCATGTGCGTTCGTTGTGTGGTCTTATGGAGAGACCCTCAGTTGAAGATACTTATCGTA  
TCAGCCTCTAAGGAGCGTGCAGACGCTAACTCCATCTTTATTAAGAACATCATTGACCTGCTGCCATTCTATCTGA  
GTTAAAGCCAAGACCCGGACAGCGTGACTCGGTAATCAGCTTTGATGTAGGCCAGCCAATCCTGACCACTCTCCTA  
GTGTGAAATCAGTAGGTATCACTGGTCACTTAAGTGGTGGTGGTGGTGGTGGTGGTGGTGGTGGTGGTGGTGGTGGT  
CCGTCTAACAGCGCAACTATGGGTGCCCGTGGAGAGCTATGGACTCTGGTTCAGGAGTTTCGCTGCGTTACTTAAACC  
GCTGCCTTCTCTCGCGTTATCTACCTTGGTACACCTCAGACAGAGATGACTCTCTATAAGGAACCTTGAGGATAACC  
GTGGGTACACAACCATTATCTGGCCTGCTCTGTACCCAAGGACACGTGAAGAGAACCCTCTATTACTCACAGCGTCTT  
GCTCCTATGTTACGCGCTGAGTACGATGAGAACCCTGAGGCACCTTGCTGGGACTCCAACAGACCCAGTGGCCTTTGA  
CCGTGATGACCTGCGCGAGCGTGAGTTGGAATACGGTAAGGCTGGCTTTACGCTACAGTTCATGCTTAAACCCTAACC  
TTAGTGATGCCGAGAAGTACCCGCTGAGGCTTCGTGACGCTATCGTAGCGGCCTTAGACTTAGAGAAGGCCCAATG  
CATTACCAGTGGCTTCCGAACCGTCAGAACATCATTGAGGACCTTCTTAACGTTGGCCTTAAGGGTGTGACCTGCA  
TACGTACCACGATTGTTCCAACAACACTCAGGTGACTACCAACAGAAGATTCTGGTCAATTGACCTTAGTGGTTCGCGGTA  
AGGACGAAACAGGTTACGCTGTGCTGTACACACTGAACGGTTACATCTACCTTATGGAAGCTGGAGGTTTTCCGTGAT  
GGCTACTCCGATAAGACCCTTGAGTTACTCGCTAAGAAGGCAAAGCAATGGGGAGTCCAGACGGTTGTCTACGAGAG  
TAACTTCGGTGACGGTATGTTCCGGTAAGGTATTAGTCCATCTCTTCTTAAACACCACAACCTGTGCGATGGAAGAGA  
TTCGTGCCCCGTGGTATGAAAGAGATGCGTATTTGCGATAACCCTTGGCCAGTCATGCAGACTCACCGCCTTGTAATT  
CGTGATGAGGTCATTAGGGCCGACTACCAGTCCGCTCGTGACGTAGACGGTAAGCATGACGTTAAGTACTCGTTGTT  
CTACCAGATGACCCGTATCACTCGTGAGAAAGGCGCTCTGGCTCATGATGACCGATTGGATGCCCTTGGCTTAGGCA  
TTGAGTATCTCCGTGAGTCCATGCAGTTGGATTCCGTTAAGGTCGAGGGTGAAGTACTTGCTGACTTCTTGGAGAA  
CACATGATGCGTCTACGGTTGCTGCTACGCATATCATTGAGATGTCTGTGGGAGGAGTTGATGTGACTCTGAGGA  
CGATGAGGGTTACGGTACGCTTTTCAATTGAGTGGTGATTTATGCATTAGGACTGCATAGGGATGCATATAGACCAC  
GGATGGTCAGTCTTTAAGTTACTGAAAAGACACGATAAATTAATACGACTCACTATAGGGAGAGGAGGGACGAAAG

GTTACTATATAGATACTGAATGAATACTTATAGAGTGCATAAAGTATGCATAATGGTGTACCTAGAGTGACCTCTAA  
GAATGGTGATTATATTGTATTAGTATCACCTTAACTTAAAGGACCAACATAAAGGGAGGAGACTCATGTTCCGCTTAT  
TGTTGAACCTACTGCGGCATAGAGTACCTACCGATTTCTTGTGGTACTTTGTGCTGCCCTTGGGTACGCATCTCTT  
ACTGGAGACCTCAGTTCAGTGGAGTCTGTCTGTTTTGCTCTATACTCACTTGTAGCGATTAGGGTCTTCTGACCGACT  
GATGGCTCACCGAGGGATTACAGCGGTATGATTGCATCACACCACTTCATCCCTATAGAGTCAAGTCCTAAGGTATAC  
CCATAAAGAGCCTCTAATGGTCTATCCTAAGGTCTATACCTAAAGATAGGCCATCCTATCAGTGTACCTAAAGAGG  
GTCTTAGAGAGGGCCTATGGAGTTCCTATAGGGTCCCTTAAAAATATACCATAAAAAATCTGAGTGACTATCTCACAGT  
GTACGGACCTAAAGTTCCTCCCATAGGGGGTACCTAAAGCCCAGCCAATCACCTAAAGTCAACCTTCGGTTGACCTTG  
AGGGTTCCTAAGGGTTGGGGATGACCCTTGGGTTTTGTCTTTGGGTGTTACTTCCCTCATAGGGGGTACCTAAAGCC  
CAGCCAATCACCTAAAGTCAACCTTCGGTTGACCTTGAGGGTTCCTAAGGGTTGGGGATGACCCTTGGGTTTTGTCT  
TTGGGTGTTACTTACCTTGAGTGTCTCTGTGTCTTCTGTCTGTTACAGTCTCCTAAAGTATCCTCCTAAAGTCACTCCT  
AACGTCCATCCTAAAGCCAACACCTAAAGCCTACACCTAAAGACCCATCAAGTCAACGCCTATCTTAAAGTTTAAAC  
ATAAAGACCAGACCTAAAGACCAGACCTAAAGACACTACATAAAGACCAGACCTAAAGACGCCTTGTTGTTAGCCAT  
AAAGTGATAACCTTTAATCATTGTCTTTATTAATACAACCTCACTATAAGGAGAGACAACCTTAAAGAGACTTAAAAGA  
TTAATTTAAAATTTATCAAAAAGAGTATTGACTTAAAGTCTAACCTATAGGATACTTACAGCCATCGAGAGGGACAC  
GGCGAATAGCCATCCCAATCGACACCGGGGTCAACCGGATAAGTAGACAGCCTGATAAGTCGCACGAAAAACAGGTA  
TTGACAACATGAAGTAACATGCAGTAAGATACAAATCGCTAGGTAACACTAGCAGCGTCAACCGGGCGCACAGTGCC  
TTCTAGGTGACTTAAGCGCACCCACGGCACATAAGGTGAAACAAAACGGTTGACAACATGAAGTAAACACGGTACGAT  
GTACCACATGAAACGACAGTGAAGTACCACACTGAAAGGTGATGCGGTCTAACGAAACCTGACCTAAGACGCTCTTT  
AACAATCTGGTAAATAGCTCTTGAGTGCATGACTAGCGGATAACTCAAGGGTATCGCAAGGTGCCCTTTATGATATT  
CACTAATAACTGCACGAGGTAACACAAGATGGCTATGTCTAACATGACTTACAACAACGTTTTTCGACCACGCTTACG  
AAATGCTGAAAGAAAACATCCGTTATGATGACATCCGTGACACTGATGACCTGCACGATGCTATTACATGGCTGCC  
GATAATGCAGTTCGCGACTACTACGCTGACATCTTTAGCGTAATGGCAAGTGAGGGCATTGACCTTGAGTTTGAAGA  
CTCTGGTCTGATGCCTGACACCAAGGACGTAATCCGCATCCTGCAAGCGCGTATCTATGAGCAATTAACGATTGACC  
TCTGGGAAGACGCAGAAGACTTGCTCAATGAATACTTGGAGGAAGTCGAGGAGTACGAGGAGGATGAAGAGTAATGT  
CTACTACCAACGTGCAATACGGTCTGACCGCTCAAACGTACTTTTCTATAGCGACATGGTGCCTGTGGCTTTAAC  
TGGTCACTCGCAATGGCACAGCTCAAAGAAGTGTACGAAAACAACAAGGCAATAGCTTTAGAATCTGCTGAGTGATA  
GACTCAAGTTCGCTCCTAGCGAGTGGCTTTATGATTACTTTACTTATGAGGGAGTAATGTATATGCTTACTAT  
CGGTCTACTACCGCTCTAGGTCTAGCTGTAGGTGATCCTTTGGGAAGGCTTTAGGTGTAGCTGTAGGTTCTACT  
TTACCGTCTGCATCATCATAGGAATCATCAAAGGGGCACCTACGCAAATGATGAAGCACTACGTTATGCCAATCCACA  
CGTCCAACGGGGCAACCGTATGTACACCTGATGGGTTGCAATGAAACAACGAATCGAACGCCTTAAAGCGTGAACCTC  
CGCATTAAACCGCAAGATTAACAAGATAGGTTCCGGCTATGACAGAACGCCTGATGGCTTAAAGAAAGGTTATATGC  
CCAATGGCACACTATACGCTGCAAATCGGCGAATAGTGAGAAGTGGGCGAGAGAACAACCTCGAACGCCGCAAGGAA  
CAAGAGAGGGCGGCGTGGCATAGACGAAAGGAAAAGGTTAAAGCCAAGAAACTCGCCGCACTTGAACAGGCACTAGC  
CAACACACTGAACGCTATCTCATAACGAACATAAAGGACACAATGCAATGAACATTACCGACATCATGAACGCTATC  
GACGCAATCAAAGCACTGCCAATCTGTGAACCTTGACAAGCGTCAAGGTATGCTTATCGACTTACTGGTTCGAGATGGT  
CAACAGCGAGACGTGTGATGGCGAGCTAACCGAATAAATCAGGCCTTGAGCATCAAGATTGGTGGACTACCTTGA  
AGTGTCTCACGGCTGACGCAGGGTTCAAGATGCTCGGTAATGGTCACTTCTCGGCTGCTTATAGTACCCCGCTGCTA  
CCTAACAGAGTGATTAAGGTGGGCTTTAAGAAAGAGGATTGAGGCGCAGCCTATACCGCATTCTGCCGATGTATCA  
GGGTCTGCTGGTATCCCTAACGTCTACGATGTACAGCGCCACGCTGGATGCTATACGGTGGTACTTGACGCACTTA  
AGGATTGCGAGCGTTTTCAACAATGATGCCCATTTATAAATACGCTGAGATTGCAAGCGACATCATTGATTGCAATTCG  
GATGAGCATGATGAGTTAACTGGATGGGATGGTGAAGTTTGTGAAACTTGTAAACTAATCCGCAAGTTCTTTGAGGG  
CATCGCCTCATTGACATGCATAGCGGGAACATCATGTTCTCAAATGGAGACGTACCATAACATCACCGACCCGGTAT  
CATTCTCGCAGAAGAAAGACGGTGGCGCATTACGATCGACCCTGAGGAACTCATCAAGGAAGTCGAGGAAGTCGCA  
CGACAGAAAGAAATGACCGCGCTAAGGCCCGTAAAGAAGCTCACGAGGGGCGCTTAGAGGCACGCAGATTCAAACG  
TCGCAACCGCAAGGACGTAAGGCACACAAAGCTAAGCGCGAAAGAATGCTTGTGCTGCGTGGCGATGGGCTGAACGTC  
AAGAACGGCGTAACCATGAGGTAGCTGTAGATGTACTAGGAAGAACCAATAACGCTATGCTCTGGGTCAACATGTTT  
TCTGGGGACTTTAAGGCGCTTGAAGAACGAATCGCGCTGCACTGGCGTAATGCTGACCGGATGGCTATCGCTAATGG  
TCTTACGCTCAACATTGATAAGCAACTTGACGCAATGTTAATGGGCTGATAGTCTTATCTTACAGGTCTCTGCGGG  
TGGCCTGAATAGGTACGATTTACTAACTGGAAGAGGCATAAATGAACACGATTAACATCGCTAAGAACGACTTCTC  
TGACATCGAACTGGCTGCTATCCCCTTCAACACTCTGGCTGACCATTACGGTGAAGCGTTTTAGCTCGCGAACAGTTGG  
CCCTTGAGCATGAGTCTTACGAGATGGGTGAAGCACGCTTCCGCAAGATGTTTGAAGCGTCAACTTAAAGCTGGTGA  
GTTGCGGATAACGCTGCCGCCAAGCCTCTCATCACTACCCTACTCCCTAAGATGATTGCACGCATCAACGACTGGTT  
TGAGGAAGTGAAGCTAAGCGCGGCAAGCGCCGACAGCCTTCCAGTTCCTGCAAGAAATCAAGCCGGAAGCCGTAG  
CGTACATCACCATTAAGACCACTCTGGCTTGCCTAACAGTGTGACAATAACAACCGTTTCAAGGCTGTAGCAAGCGCA  
ATCGGTTCGGGCCATTGAGGACGAGGCTCGCTTCCGGTCTGATCCGTGACCTTGAAGCTAAGCACTTCAAGAAAAACGT  
TGAGGAACAACCTCAACAAGCGCGTAGGGCACGTCTACAAGAAAGCATTATGCAAGTTGTGAGGCTGACATGCTCT



CGTTAAGAATTTACGGTTCGCCGTGCTGACCGTTCAATCGTATGTGCGAGCGAGCGCCGAGCTAAGATACCTCTTA  
TTGGTAACACAGTTCCTTTGGCACCAGCGTCCACATCATTATCACCCGTGGTGACTTTGAGAAAGCAATAGACAAG  
AAACGTCCGGTTCCTTAGTGTGGCAGTGACCCGCTTCCCGTTCGTCCGTCTGTTACTCAAACGAATCAAGGAGGTGTT  
CTGATGGGACTGTTAGATGGTGAAGCCTGGGAAAAAGAAAACCCGCCAGTACAAGCAACTGGGTGTATAGCTTGCTT  
AGAGAAAGATGACCGTTATCCACACACCTGTAACAAAGGAGCTAACGATATGACCGAACGTGAACAAGAGATGATCA  
TTAAGTTGATAGACAATAATGAAGGTCGCCAGATGATTTGAATGGCTGCGGTATTCTCTGCTCCAATGTCCCTTGC  
CACCTCTGCCCGCAAATAACGATCAAAAGATAACCTTAGGTGAAATCCGAGCGATGGACCCACGTAAACCACATCT  
GAATAAACCTGAGGTAACCTCCTACAGATGACCAGCCTTCCGCTGAGACAATCGAAGGTGTCACTAAGCCTTCCCCT  
ACATGCTGTTTGACGACATTGAGGCTATCGAAGTGATTGCTCGTTCAATGACCGTTGAGCAGTTC AAGGGATACTGC  
TTCGGTAACATCTTAAAGTACAGACTACGTGCTGGTAAGAAGTCAGAGTTAGCGTACTTAGAGAAAGACCTAGCGAA  
AGCAGACTTCTATAAAGAAGCTTTTGGAAAACATAAGGATAAATGTTGTGCATAACTTCAAGTCAACCCACCTGCC  
GACAGCCTATCTGATGACTTACATCTTGCTCAGAGTGGTCCCGAAAGATGTGGGAAGAGACATTCGACGATGCGTA  
CATCAAGCTGTATGAACTTTGGAAATCGAGAGGTCAATGACTATGTCAAACGTAAATACAGGTTCACTTAGTGTGGA  
CAATAAGAAGTTTTGGGCTACCGTAGAGTCCCGAGCATTCTTCCGAGGTTCCAATCTACGCTGAGACCCCTAGACG  
AAGCTCTGGAGTTAGCCGAATGGCAATACGTTCCGGCTGGCTTTGAGGTTACTCGTGTGCGTCTTGTGTAGCACCG  
AAGTAATACGACTCACTATTAGGGAAGACTCCCTCTGAGAAACCAAACGAAACCTAAAGGAGATTAACATTATGGCT  
AAGAAGATTTTACCTCTGCGCTGGGTACCGCTGAACCTTACGCTTACATCGCCAAGCCGGACTACGGCAACGAAGA  
GCGTGGCTTTGGGAACCCCTCGTGGTGTCTATAAAGTTGACCTGACTATTCCCAACAAAGACCCGCGCTGCCAGCGTA  
TGGTCGATGAAATCGTGAAGTGTACGAAGAGGCTTATGCTGCTGCCGTTGAGGAATACGAAGCTAATCCACCTGCT  
GTAGCTCGTGGTAAGAAACCGCTGAAACCGTATGAGGGTGACATGCCGTTCTTCGATAACGGTGACGGTACGACTAC  
CTTTAAGTTCAAATGCTACGCGTCTTTCCAAGACAAGAAGACCAAAGAGACCAAGCACATCAATCTGGTTGTGGTTG  
ACTCAAAGGTAAGAAGATGGAAGACGTTCCGATTATCGGTGGTGGCTCTAAGCTGAAAGTTAAATATTCTCTGGTT  
CCATACAAGTGGAACTGCTGTAGGTGCGAGCGTTAAGCTGCAACTGGAATCCGTTGATGCTGGTTCGAACCTGGCTAC  
CTTTGGTGGCGGTGAAGACGATTGGGCTGACGAAGTTGAAGAGAACGGCTATGTTGCCTCTGGTTCTGCCAAAGCGA  
GCAAACCACGCGACGAAGAAAGCTGGGACGAAGACGACGAAGAGTCCGAGGAAGCAGACGAAGACGGGACTTCTAA  
GTGGAACCTGCGGGAGAAAATCCTTGAGCGAATCAAGGTGACTTCCCTCTGGGTGTTGGGAGTGGCAGGGCGCTACGAA  
CAATAAAGGTTACGGGCAGGTGTGGTGCAGCAATACCGGAAAGGTTGTCTACTGTATCGCGTAATGTCTAATGCTC  
CGAAAGGTTCTACCGTCTGCCTCCTGTGATAATCCATTATGTTGTAACCCTGAACACCTATCCATAGGAACTCCA  
AAAGAACTCCACTGACATGGTAAATAAGGGTCGCTCACACAAGGGGTATAAACTTTCCAGCAAGACGTAATGGC  
AATCATGGAGTCCAGCGAGTCCAATGTATCCTTAGCTCGCACCTATGGTGTCTCCCAACAGACTATTTGTGATATAC  
GCAAAGGGAGGCGACATGGCAGGTTACGGCGCTAAAGGAATCCGAAAGGTTGGAGCGTTTTCGCTCTGGCCTAGAGGA  
CAAGGTTTTCAAAGCAGTTGGAATCAAAGGTTAAATTCGAGTATGAAGAGTGGAAAGTGCCTTATGTAATTCGGG  
CGAGCAATCACACTTACACTCCAGACTTCTTACTTCCAAACGGTATATTCTGTTGAGACAAAGGGTCTGTGGGAAAGC  
GATGATAGAAAGAAGCACTTATTAATTAGGGAGCAGCACCCCGAGCTAGACATCCGTATTGTCTTCTCAAGCTCACG  
TACTAAGTTATACAAAGGTTCTCCAACGTCTTATGGAGAGTCTGCGAAAAGCATGGTATTAAGTTCGCTGATAAAC  
TGATACCTGCTGAGTGGATAAAGGAACCCAAGAAGGAGGTCCCTTTGATAGATTAAGAAAGGAAAGGAGGAAAGAAA  
TAATGGCTCGTGTACAGTTTTAAACAACGTGAATCTACTGACGCAATCTTTGTTCACTGCTCGGCTACCAAGCCAAGT  
CAGAATGTTGGTGTCCGTGAGATTCGCCAGTGGCACAAGAGCAGGGTTGGCTCGATGTGGGATAACCACTTTATCAT  
CAAGCGAGACGGTACTGTGGAGGCAGGACGAGATGAGATGGCTGTAGGCTCTCACGCTAAGGGTTACAACCACAACT  
CTATCGGCGTCTGCCTTGTGGTGGTATCGACGATAAAGGTAAGTTCGACGCTAACTTTACGCCAGCCAAATGCAA  
TCCCTTCGCTCACTGCTTGTACACTGCTGGCTAAGTACGAAGGCGCTGTGCTTCGCGCCCATCATGAGGTGGCGCC  
GAAGGCTTGCCCTTCGTTTCGACCTTAAGCGTTGGTGGGAGAAGAACGAACCTGGTCACTTCTGACCGTGGATAATTA  
TTGAACTCACTAAAGGGAGACCACAGCGGTTTTCCCTTTGTTTCGCATTGGAGGTCAAATAATGCGCAAGTCTTATAAA  
CAATTCTATAAGGCTCCGAGGAGGCATATCCAAGTGTGGGAGGCAGCCAATGGGCCTATACCAAAGGTTATTATAT  
AGACCACATTGACGGCAATCCACTCAACGACGCCTTAGACAATCTCCGTCTGGCTCTCCAAAAGAAAACCTCATGGA  
ACATGAAGACTCCAAAGAGCAATACCTCAGGACTAAAGGGACTGAGTTGGAGCAAGGAAAGGGAGATGTGGAGAGGC  
ACTGTAACAGCTGAGGGTAAACAGCATAACTTTTCGTAGTAGAGATCTATTGGAAGTCGTTGCGTGGATTTATAGAAC  
TAGGAGGGAATTGCATGGACAATTCGCACGATTCCGATAGTGTATTTCTTTACCACATTCCTTGTGACAACCTGTGGG  
AGTAGTGATGGGAACTCGCTGTTCTCTGACGGACACACGTTCTGCTACGTATGCGAGAAGTGGACTGCTGGTAATGA  
AGACACTAAAGAGAGGGCTTCAAACGGAACCCCTCAGGAGGTAAACCAATGACTTACAACGTGTGGAACCTTCGGGG  
AATCCAATGGACGCTACTCCGCGTTAACTGCGAGAGGAATCTCCAAGGAAACCTGTGAGAAGGCTGGCTACTGGATT  
GCCAAAGTAGACGGTGTGATGTACCAAGTGGCTGACTATCGGGACCAGAACGGCAACATTGTGAGTCAGAAGGTTTCG  
AGATAAAGATAAGAACTTTAAGACCACTGGTAGTCACAAGAGTGACGCTCTGTTCCGGAAAGCACTTGTGGAATGGTG  
GTAAGAAGATTGTGTTACAGAAGGTGAAATCGACATGCTTACCGTGTGGAACCTCAAGACTGTAAGTATCCTGTA  
GTGTCGTTGGGTACGGTGCCTCTGCCGCTAAGAAGACATGCGCTGCCAACTACGAATACTTTGACCAGTTTCAACA  
GATTATCTTAATGTTTCGATATGGACGAAGCAGGGCGCAAAGCAGTCAAGAGGCTGCACAGGTTCTACCTGCTGGTA  
AGGTACGAGTGGCAGTTCCTCCGTGTAAGGATGCAAACGAGTGTACCTAAATGGTACGACCGTGAATCATGGAG

CAAGTGTGGAATGCTGGTCCTTGGATTCCCTGATGGTGTGGTATCGGCTCTTTTCGTTACGTGAACGAATCCGTGAGCA  
CCTATCGTCCGAGGAATCAGTAGGTTTACTTTTTAGTGGCTGCACTGGTATCAACGATAAGACCTTAGGTGCCCGTG  
GTGGTGAAGTCATTATGGTCACTTCCGGTTCGGGTATGGGTAAGTCAACGTTTCGTCGGTCAACAAGCTCTACAATGG  
GGCACAGCGATGGGCAAGAAGGTAGGCTTAGCGATGCTTGAGGAGTCCGTTGAGGAGACCGCTGAGGACCTTATAGG  
TCTACACAACCGTGTCCGACTGAGACAATCCGACTCACTAAAGAGAGAGATTATTGAGAACGGTAAGTTCGACCAAT  
GGTTCGATGAACTGTTTCGGCAACGATACGTTCCATCTATATGACTCATTTCGCCGAGGCTGAGACGGATAGACTGCTC  
GCTAAGCTGGCCTACATGCGCTCAGGCTTGGGCTGTGACGTAATCATTCTAGACCACATCTCAATCGTCGTATCCGC  
TTCTGGTGAATCCGATGAGCGTAAGATGATTGACAACCTGATGACCAAGCTCAAAGGGTTCGCTAAGTCAACTGGGG  
TGGTGTGGTCGTAATTTGTACCTTAAGAACCCAGACAAAGGTAAAGCACATGAGGAAGGTGCCCCGTTTCTATT  
ACTGACCTACGTGGTTCTGGCGCACTACGCCAATCTGATACTATTATTGCCCTTGAGCGTAATCAGCAAGCGA  
TATGCCATAACCTTGTCTCGTTCGTTTCTCAAGTCCGCTTTACTGGTGATACTGGTATCGTGGTACATGGAAT  
ACAACAAGGAAACCGGATGGCTTGAACCATCAAGTTACTCAGGGGAAGAAGAGTCACTACTCAGAGTCAACAGACTGG  
TCCAACGACACTGACTTCTGACAGGATTCTTGATGACTTTCCAGACGACTACGAGAAGTTTCGCTGGAGAGTCCCAT  
TCTAATACGACTCACTAAAGGAGACACACCATGTTCAAACCTGATTAAGAAGTTAGGCCAACTGCTGGTTCGTATGTA  
CAACGTGGAAGCCAAGCGACTGAACGATGAGGCTCGTAAAGAGGGCCACACAGTACGCGCTCTGGCGATTTCGCTCCA  
ACGAACTGGCTGACAGTGCATCCACTAAAGTTACCGAGGCTGCCCGTGTGGCAAACCAAGCTCAACAGCTTTCCAAA  
TTCTTTGAGTAATCAAACAGGAGAAACCATTATGTCTAACGTAGCTGAAACTATCCGTCTATCCGATACAGCTGACC  
AGTGGAAACCGTCGAGTCCACATCAACGTTTCGCAACGGTAAGGCGACTATGGTTTACCGCTGGAAGGACTCTAAGTCC  
TCTAAGAATCACACTCAGCGTATGACGTTGACAGATGAGCAAGCACTGCGTCTGGTCAATGCGCTTACCAAAGCTGC  
CGTGACAGCAATTCATGAAGCTGGTTCGCGTCAATGAAGCTATGGCTATCCTCGACAAGATTGATAACTAAGAGTGGT  
ATCCTCAAGGTGCGCAAAGTGGTGGCCTTCATGAATACTATTTCGACTCACTATAGGAGATATTACCATGCGTGACCC  
TAAAGTTATCCAAGCAGAAATCGCTAAACTGGAAGCTGAACTGGAGGACGTTAAGTACCATGAAGCTAAGACTCGCT  
CCGCTGTTACATCTTGAAGAACTTAGGCTGGACTTGGACAAGACAGACTGGCTGGAAGAAACCAGAAGTTACCAAG  
CTGAGTCATAAGGTGTTTCGATAAGGACACTATGACCCACATCAAGGCTGGTGATTGGGGTTAAGGTTGACATGGGAGT  
TGTTGGTGGATACGGCTACGTCCGCTCAGTTAGTGGCAAATATGCACAAGTGTACATACATCACAGGTGTTACTCCAC  
GCGGTGCAATCGTTGCCGATAAGACCAACATGATTACACACAGGTTTCTTGACAGTTGTTTCATATGAAGAGATTGTT  
AAGTCACGATAATCAATAGGAGAAATCAATATGATCGTTTCTGACACTCGAAGCTAACGCCCTCTTAGAGAGCGTCAC  
TAAGTTCACACTGCGGGGTTATCTACGACTACTCCACCGCTGAGTACGTAAGCTACCGTCCGAGTACTTCGGTGCCT  
ATCTGGATGCGCTGGAAGCCGAGGTTGCACGAGGCGGCTTTATTGTGTTCCACAACGGTACAAGTATGACGTTCCCT  
GCATTGACCAAACCTGGCAAAGTTGCAATTGAACCGAGAGTCCACCTTCTCGTGAGAAGTATTGACACCCCTTGT  
GTTGTACGTTTTGATTCAATCCAACCTCAAGGACACCGATATGGGTCTTCTGCGTTCGGCAAGTTGCCCGGAAAC  
GCTTTGGGTCTCACGCTTTGGAGGCGTGGGGTTATCGCTTAGGCGAGATGAAGGGTGAATACAAAGACGACTTTAAG  
CGTATGCTTGAAGAGCAGGGTGAAGAATACGTTGACGGAATGGAGTGGTGGAACTTCAACGAAGAGATGATGGACTA  
TAACGTTACAGGACGTTGTGGTAACATAAGCTCTCCTTGAGAAGCTACTCTCTGACAAACATTACTTCCCTCCTGAGA  
TTGACTTTACGGACGTAGGATACACTACGTTCTGGTCAAGATCCCTTGAGGCCGTTGACATTGAACATCGTGCTGCA  
TGGCTGCTCGCTAAACAAGAGCGCAACGGGTTCCCGTTTGACACAAAAGCAATCGAAGAGTTGTACGTAGAGTTAGC  
TGCTCGCCGCTCTGAGTTGCTCCGTAATTTGACCGAAACGTTTCGGCTCGTGGTATCAGCCTAAAGGTGGCACTGAGA  
TGTTCTGCCATCCGCGAACAGGTAAGCCACTACCTAAATACCCTCGCATTAAAGACACCTAAAGTTGGTGGTATCTTT  
AAGAAGCCTAAGAACAAGGCACAGCGAGAAGGCCGTTGAGCCTTGCGAAGCTTGAATACCCGCGAGTACGTTGCTGGTGC  
TCCTTACACCCAGTTGAACATGTTGTGTTAACCCTTCGTTCTCGTGACCACATTGAGAAGAACTCCAAGAGGCTG  
GGTGGGTCCCGACCAAGTACACCGATAAGGGTGTCTCTGTGGTGGACGATGAGGTACTCGAAGGAGTACGTGTAGAT  
GACCCTGAGAAGCAAGCCGCTATCGACCTCATTAAAGAGTACTTGATGATTGAGAAGCGAATCGGACAGTCTGCTGA  
GGGAGACAAAGCATGGCTTCGTTATGTTGCTGAGGATGGTAAGATTGATGGTTCTGTTAACCTAATGGAGCAGTTA  
CGGGTTCGTGCGACCCATGCGTTCCCAAACCTTGCGCAAATTCGGGTGTACGTTCTCCTTATGGAGAGCAGTGTGCG  
GCTGCTTTTGGCGCTGAGCACCATTTGGATGGGATAACTGGTAAGCCTTGGGTTTCAGGCTGGCATCGACGCATCCGG  
TCTTGAGCTACGCTGCTTGGCTCACTTCATGGCTCGCTTTGATAACGGCGAGTACGCTCACGAGATTCTTAACGGCG  
ACATCCACACTAAGAACCAGATAGCTGCTGAACCTACCTACCCGAGATAACGCTAAGACGTTTCACTATGGGTTCCCTC  
TATGGTGTGGTATGAGAAGATTGGACAGATTGTTGGTGTGGTAAAGAGCGCGGTAAGGAACTCAAGAAGAAATTT  
CCTTGAGAACACCCCGCGATTGCAGCACTCCGCGAGTCTATCCAACAGACACTTGTGAGTCTCTCAATGGGTAG  
CTGGTGAGCAACAAGTCAAGTGGAAACGCCGCTGGATTAAAGGTCTGGATGGTTCGTAAGGTACACGTTTCGTAGTCTC  
CACGCTGCCTTGAATACCCTACTGCAATCTGCTGGTGTCTCATCTGCAAACCTGTGGATTATCAAGACCGAAGAGAT  
GCTCGTAGAGAAAGGCTTGAAGCATGGCTGGGATGGGGACTTTGCGTACATGGCATGGGTACATGATGAAATCCAAG  
TAGGCTGCCGTACCGAAGAGATTGCTCAGGTGGTCATTGAGACCGCACAAAGAAGCGATGCGCTGGGTTGGAGACCAC  
TGGAACCTCCGGTGTCTTCTGGATAACCGAAGGTAAGATGGGTCTAATTTGGGCGATTTGCCACTGATACAGGAGGCT  
ACTCATGAACGAAAGACACTTAACAGGTGCTGCTTCTGAAATGCTAGTAGCCTACAAATTTACCAAAGCTGGGTACA  
CTGTCTATTACCCTATGCTGACTCAGAGTAAAGAGGACTTGGTTGTATGTAAGGATGGTAAATTTAGTAAGGTTTCAG  
GTTAAAACAGCCACAACGGTTCAAACCAACACAGGAGATGCCAAGCAGGTTAGGCTAGGTGGATGCGGTAGGTCCGA

ATATAAGGATGGAGACTTTGACATTCTTGCGGTTGTGGTTGACGAAGATGTGCTTATTTTTACATGGGACGAAGTAA  
AAGGTAAGACATCCATGTGTGTGTCGGCAAGAGAAACAAAGGCATAAAACTATAGGAGAAATTATTATGGCTATGACAA  
AGAAATTTAAAGTGTCTTTCGACGTTACCGCAAAGATGTGCTGTGACGTTTCAGGCAATCTTAGAGAAAGATATGCTG  
CATCTATGTAAGCAGGTTCGGCTCAGGTGCGATTGTCCCAATGGTAAACAGAAGGAAATGATTGTCCAGTTCCCTGAC  
ACACGGTATGGAAGGATTGATGACATTTCGTAGTACGTACATCATTTCGTGAGGCCATTAAGGACATGCACGAAGAGT  
ATGCAGATAAGGACTCTTTCAAACAATCTCCTGCAACAGTACGGGAGGTGTTCTGATGTCTGACTACCTGAAAGTGC  
TGCAAGCAATCAAAAGTTGCCCTAAGACTTTCCAGTCCAATATGTACGGAACAATGCGAGCCTCGTAGCGGAGGCC  
GCTTCCCGTGGTCACATCTCGTGCCTGACTACTAGTGGACGTAACGGTGGCGCTTGGGAAATCACTGCTTCCGGTAC  
TCGCTTTCTGAAACGAATGGGAGGATGTGTCTAATGTCTCGTGACCTTGTGACTATTCCACGCGATGTGTGGAACGA  
TATACAGGGCTACATCGACTCTCTGGAACGTGAGAACGATAGCCTTAAGAATCAACTAATGGAAGTCAGCAATAACG  
TAGCGGAATAGAGGAGAACTTAATGGCACTTCTTGACCTTAAACAATCTATGAGTTACGTGAAGGCTGCGACGA  
CAAGGGTATCCTTGTGATGGACGGCGACTGGCTGGTCTTCCAAGCTATGAGTGTGCTGAGTTTGTATGCCTCTTGGG  
AGGAAGAGATTTGGCACCGATGCTGTGACCACGCTAAGGCCCGTCAGATTCTTGAGGATTCCATTAAGTCCACGAG  
ACCCGTAAGAAGGCTTGGGCAGGTGCTCCAATTGTCTTTCGCTTACCAGATAGTGTAACTGGCGTAAAGAAGTGGT  
TGACCCGAACTATAAGGCTAACCCTAAGGCCGTGAAGAAACCTGTAGGGTACTTTGAGTTCCTTGATGCTCTCTTTG  
AGCGCGAAGAGTTCTATTGCATCCGTGAGCCTATGCTTGAGGGTGTATGACGTTATGGGAGTTATTGCTTCCAATCCG  
TCTGCCTTCGGTGTCTGTAAGGCTGTAATCATCTCTTTCGATAAAGACTTTAAGACCATCCCTAACTGTGACTTCTT  
GTGGTGTACCACTGGTAACATCCTGACTCAGACCGAAGAGTCCGCTGACTGGTGGCACCTCTTCCAGACCATCAAGG  
GTGACATCACTGATGGTTACTCAGGGATTGCTGGATGGGGTGATACCGCCGAGGACTTCTTGAATAACCCGTTTATA  
ACCGAGCCTAAAACGTCTGTGCTTAAGTCCGGTAAGAACAAGGCCAAGAGGTTACTAAATGGGTAAACGCGACCC  
TGAGCCTCATGAGACGCTTTGGGACTGCATTAAGTCCATTGGCGCGAAGGCTGGTATGACCGAAGAGGATATTATCA  
AGCAGGGCCAAATGGCTCGAATCCTACGGTTCAACGAGTACAACCTTTATTGACAAGGAGATTTACCTGTGGAGACCG  
TAGCGTATATTGGTCTGGGTCTTTGTGTTCTCGGAGTGTGCCTCATTTCGTGGGGCCTTTGGGACTTAGCCAGAATA  
ATCAAGTCGTTACACGACACTAAGTGATAAACTCAAGGTCCCTAAATTAATACGACTCACTATAGGGAGATAGGGGC  
CTTTACGATTATTACTTTAAGATTTAACTCTAAGAGGAATCTTTATTATGTAAACACCTATTAACCAATTACTTAAG  
AACCTAACGATATTCCAGATGTACCTCGTGCAACCGCTGAGTATCTACAGGTTTCGATTCAACTATGCGTACCTCGA  
AGCGTCTGGTCAATAGGACTTATGCGTGTAAATGGTGTAGTGGAGGCCACATCTTGGGTTTTCATTACAGGGCCTAC  
AGTATGCCTCTAACGTCATTGACGAGATTGAGTTACGCAAGGAACAATAAGAGATGATGGGAGGATGACACTAT  
GTGTTTTCTCACCGAAAATTAATACTCCGAAGATGGATAACCAATCAGATTTCGAGCCGTTGAGCCAGCCCTCTGACCC  
AAGAAGTCTCAAGCGTGGAGTTCCGGTGGTCTTCTGATGAGACGGATACCGAGGGCACCGAAGTGTCTGGACGCAAA  
GGCCTCAAGGTGCAACGTGATGATTCCGTAGCGAAGTCTAAAGCCAGCGGCAATGGCTCCGCTCGTATGAAATCTTC  
CATCCGTAAGTCCGCATTTGGAGGTAAGAAGTGTGCTGAGTTCACATGTGTGGAGGCTAAGAGTTCGCTTCCGTGC  
AATCCGGTGGACTGTGGAACACCTTGGGTTGCCTAAAGGATTTCGAAGGACACTTTGTGGGCTACAGCCTCTACGTAG  
ACGAAGTGTGACATGTCTGGTTGCCGTGAAGAGTACATTCTGGACTCTACCGGAAAACATGTAGCGTACTTTCGCG  
TGGTGCCTAAGCTGTGACATTACCCACAAAGGAGACATTCTGGATGTAACGTCCGTTGTCTAATCCTGAGGCAGA  
CTCTAAGGGCTTACAGCGATTCCCTAGCGAAACGCTTTAAGTACCTTTCGCGAATCCACGATTGCGATTGGGTGTCTC  
GTTGTAAGCATGAAGGCGAGACAATGCGTGTATACTTTAAGGAGGTATAAGTTATGGGTAAGAAAGTTAAGAAGGCC  
GTGAAGAAAGTCACCAAGTCCGTTAAGAAAGTCTGTTAAGGAAGGGGCTCGTCCGGTTAAACAGGTTGCTGGCGGTCT  
AGCTGGTCTGGCTGGTGGTACTGGTGAAGCACAGATGGTGAAGTACCACAAGCTGCCGCACAGATTGTTGACGTAC  
CTGAGAAAGAGGTTTCCACTGAGGACGAAGCACAGACAGAAAGCGGACGCAAGAAAGCTCGTGTGGCGGTAAGAAA  
TCCTTGAGTGTAGCCCGTAGCTCCGGTGGCGGTATCAACATTTAATCAGGAGGTTATCGTGGAAAGACTGCATTGAAT  
GGACCGGAGGTGTCAACTCTAAGGGTTATGGTTCGTAAGTGGGTTAATGGTAAACTTGTGACTCCACATAGGCACATC  
TATGAGGAGACATATGGTCCAGTTCCAAACAGGAATTGTGGTGTATGCATATCTGCGATAACCCTAGGTGCTATAACAT  
AAAGCACCTTACGCTTGGAACTCCAAAGGATAATTCCGAGGACATGGTTACCAAAGGTAGACAGGCTAAAGGAGAGG  
AACTAAGCAAGAACTTACAGAGTCAGACGTTCTCGCTATACGCTCTTCAACCTTAAGCCACCGCTCCTTAGGAGAA  
CTGTATGGAGTCAGTCAATCAACCATAACCGCAATACTACAGCGTAAGACATGGAGACACATTTAATGGCTGAGAAA  
CGAACAGGACTTGGCGAGGATGGCGCAAAGTCTGTCTATGAGCGTTTAAAGAACGACCGTGTCTCCCTATGAGACACG  
CGCTCAGAATTGCGCTCAATATACCATCCCATCATTGTTCCCTAAGGACTCCGATAACGCCTCTACAGATTATCAAA  
CTCCGTGGCAAGCCGTGGGCGCTCGTGGTCTGAACAATCTAGCCTCTAAGCTCATGCTGGCTCTATTCCCTATGCAG  
ACTTGGATGCGACTTACTATATCTGAATATGAAGCAAAGCAGTTACTGAGCGACCCCGATGGACTCGCTAAGGTGCA  
TGAGGGCCTCTCGATGGTAGAGCGTATCATCATGAACTACATTGAGTCTAACAGTTACCGCGTACTCTCTTTGAGG  
CTCTCAAACAGTTAGTCGTAGCTGGTAACGTCCTGCTGTACCTACCGGAACCGGAAGGGTCAAACCTATAATCCCATG  
AAGCTGTACCGATTGTCTTCTTATGTGGTCCAACGAGACGCATTTCGGCAACGTTCTGCAAATGGTACTCGTGACCA  
GATAGCTTTTGGTGTCTCTCCCTGAGGACATCCGTAAGGCTGTAGAAGGTCAAGGTGGTGAAGAAAGCTGATGAGA  
CAATCGACGTGTACACTCACATCTATCTGGATGAGGACTCAGGTGAATACCTCCGATACGAAGAGGTGAGGGTATG  
GAAGTCCAAGGCTCCGATGGGACTTATCCTAAAGAGGCTTGGCCATACATCCCGATTCCGATGGTTCAGACTAGATGG  
TGAATCCTACGGTCTTTCGTACATTGAGGAATACTTAGGTGACTTACGGTCCCTTGAAATCTCCAAGAGGCTATCG

TCAAGATGTCCATGATTAGCTCTAAGGTTATCGGCTTAGTGAATCCTGCTGGTATCACCCAGCCACGCCGACTGACC  
AAAGCTCAGACTGGTGACTTCGTTACTGGTCGTCCAGAAGACATCTCGTTCCTCCAAGTGGAGAAGCAAGCAGACTT  
TACTGTAGCTAAAGCCGTAAGTGACGCTATCGAGGCTCGCCTTTTCGTTTGCCTTTATGTTGAACTCTGCGGTTTCAGC  
GTACAGGTGAACGTGTGACCCGCCGAAGAGATTCCGGTATGTAGCTTCTGAACTTGAAGATACTTTAGGTGGTGTCTAC  
TCTATCCTTTCTCAAGAATTACAATTGCCTCTGGTACGAGTGTCTTGAAGCAACTACAAGCCACGCAACAGATTCC  
TGAGTTACCTAAGGAAGCCGTAGAGCCAACCATTAGTACAGGTCTGGAAGCAATTGGTTCGAGGACAAGACCTTGATA  
AGCTGGAGCGGTGTGTCACTGCGTGGGCTGCACTGGCACCTATGCGGGACGACCCTGATATTAACCTTGCGATGATT  
AAGTTACGTATTGCCAACGCTATCGGTATTGACACTTCTGGTATTCTACTCACCGAAGAACAGAAGCAACAGAAGAT  
GGCCCAACAGTCTATGCAAAATGGGTATGGATAATGGTGTCTGCTGCGCTGGCTCAAGGTATGGCTGCACAAGCTACAG  
CTTCACCTGAGGCTATGGCTGCTGCCGTAGTTCCGTAGGTTTACAGCCGGGAATTTAATACGACTCACTATAGGGA  
GACCTCATCTTTGAAATGAGCGATGACAAGAGGTTGGAGTCTCGGCTCTTCTGTAGTTCAACTTTAAGGAGACAAT  
AATAATGGCTGAATCTAATGCAGACGTATATGCATCTTTTGGCGTGAAGTCCGCTGTGATGTCTGGTGGTTCCGTTG  
AGGAACATGAGCAGAACATGCTGGCTCTTGATGTTGCTGCCCGTGTGCGGATGATGCAATCGAGTTAGCGTCAGAC  
GAAGTGGAAACAGAACGTGACCTGTATGACAACCTCTGACCCGTTCCGGTCAAGAGGATGACGAAGGCCGATTCCAGGT  
TCGTATCGGTGATGGCTCTGAGCCGACCGATGTGGACACTGGAGAAGAAGGCGTTGAGGGCACCGAAGGTTCCGAAG  
AGTTTACCCCACTGGGCGAGACTCCAGAAGAAGTGGTAGCTGCCTCTGAGCAACTTGGTGAGCACGAAGAGGGCTTC  
CAAGAGATGATTAACATTGCTGCTGAGCGTGGCATGAGTGTGAGACCATGAGGCTATCCAGCGTGAGTACGAGGA  
GAACGAAGAGTTGTCCGCCGAGTCTACGCTAAGCTGGCTGAAATTTGGCTACACGAAGGCTTTTATTGACTCGTATA  
TCCGTGGTCAAGAAGCTCTGGTGGAGCAGTACGTAACAGTGTCTATTGAGTACGCTGGTGGTCTGTAACGTTTTGAT  
GCACTGTATAACCACCTTGAGACGCACAACCTGAGGCTGCACAGTCTGATATAATGCGTTGACCAATCGTGACTT  
AGCGACCGTTAAGGCTATCATCAACTTGGCTGGTGGTGTCTCGCGCTAAGGCGTTCCGGTTCGTAAGCCAACCTCGTAGTG  
TGACTAATCGTGCTATTCCGGCTAAACCTCAGGCTACCAAGCGTGAAGGCTTTGCGGACCGTAGCGAGATGATTA  
GCTATGAGTGACCCTCGGTATCGCACAGATGCCAACTATCGTCTGCAAGTTCGAACAGAAAGTAATCGATTTCGA  
CTGATAGACTTCGAAATTAATACGACTCACTATAGGGAGACCACAACCGTTTTCCCCCTAGAAATAATTTTTGTTTAA  
TTAAGAAGGAGATATACATATGGCTAGCATGACTGGTGGACAGCAAAATGGGTACTAACCAAGGTAAAGGTGTAGTT  
GCTGCTGGAGATAAACTGGCGTTGTTCTTGAAGGTATTTGGCGGTGAAGTCTGACTGCGTTCGCTCGTACCTCCGT  
GACCACTTCTCGCCACATGGTACGTTCCATCTCCAGCGGTAATCCGCTCAGTTCCTGTTCTGGGTGCGACTCAGG  
CAGCGTATCTGGCTCCGGGCGAGAACCTCGACGATAAAACGTAAGGACATCAAACACACCCGAGAAGGTAATCACCATT  
GACGGTCTCCTGACGGCTGACGTTCTGATTTATGATATTGAGGACGCGATGAACCACTACGACGTTTCGCTGTAGTA  
TACCTCTCAGTTGGGTGAATCTCTGGCGATGGCTGCGGATGGTGCGGTTCTGGCTGAGATTGCCGGTCTGTGTAACG  
TGGAAAGCAAATATAATGAGAACATCGAGGGCTTAGGTAAGTACTGCTACCCTAATTGAGACCACTCAGAACAAGGCCGCA  
CTTACCACCAAGTTGCGCTGGGTAAGGAGATTATTGCGGCTCTGACTAAGGCTCGTGCGGCTCTGACCAAGA  
TGTTCGGGCTGCTGACCGTGTGTTCTACTGTGACCCAGATAGCTACTCTGCGATTCTGGCAGCACTGATGCCGAACG  
CAGCAAACCTACGCTGCTCTGATTGACCCTGAGAAGGGTCTATCCGCAACGTTATGGGCTTTGAGGTTGTAGAAGTT  
CCGCACCTCACCGCTGGTGGTGTCTGGTACCGCTCGTGAGGGCACTACTGGTCAGAAGCACGCTCTTCCCTGCCAATA  
AGGTGAGGGTAATGTCAAGGTTGCTAAGGACAACGTTATCGGCTGTTTATGCACCGCTCTGCGGTAGGTAAGTTA  
AGCTGCGTGACTTGGCTCTGGAGCGCGCTCGCCGTGCTAAGTTCGAAGCGGACAGATTATCGCTAAGTACGCAATG  
GGCCACGGTGGTCTTCGCCCAGAAGCTGCAGGAGCTGTCTGATTCCAGTCAAGTGTGATGCTCGGGGATCCGAATTC  
GAGCTCCGTCTAATACGACTCACTATAGCTAAACATTAATCATTTAAAATAAGGAGGTAAGCATGAAATATCTTCT  
GCCTACGGCTGCCACGGGTTTGTACTGCTTGCAGCTCAGCCAGCGGTCGCCATGGTATTCACACTGGAGGATTTTG  
TCGGTGACTGGCGCCAGACTGCTGGATATAATCTTGATCAAGTGTGGAGCAAGGAGGCGTCTCAAGCCTTTTCCAG  
AATTTAGGTGTTAGCGTCACACCGATTCAACGTATCGTGTGAGTGGGGAAGCGGCTTAAAAATCGACATCCACGT  
CATCATTCCATATGAAGGGTTGTCAGGGGATCAGATGGGTGAGATTGAAAAGATTTTAAAGGTTGTCTACCCAGTAG  
ACGACCATCACTTCAAGGTTATTTTACACTACGGTACATTAGTAATTGACGGCGTGACTCCTAACATGATTGACTAT  
TTTGGACGCCCCGATGAGGGGATTGCAGTGTTCGACGGCAAGAAGATCACAGTTACGGGGACTCTGTGGAATGGGAA  
TAAAATATCGACGAGCGTCTGATTAACCCCGATGGCTCTCTGTTGTTCCGTGTCACTATTAACGGTGTACGGGCT  
GGCGCTTTTGTGAACGCATTTTAGCAGGCTCGAGCGGCCCTACGTCAGGTCCGGCCGGTTGCCAAGTTTTATGGGGG  
GTCAACCAGTGAACACAGGCTTTACGGCGAACGTTACTGTCAAGAACACAAGCTCCGCTCCTGTGGATGGTTGGAC  
ACTGACCTTTTCTTTCCCTCAGGTGAGCAAGTACACAGGCGTGGAGTTCTACGGTTACACAATCTGGTTCTGCTG  
TTACTGTCCGTAACGCGCCCTGGAATGGAAGCATCCAGCGGGCGGGACCGCACAGTTTGGCTTCAATGGCTCTCAT  
ACAGGGACAAACGCAGCACCAACAGCATTTTCTTGAATGGAACCCCTTGCACTGTGCGATAAGCTTGCGGCCGCAC  
TCGAGTAAGTATGAAACGTTGAGACTGCCGCTGAGTTATCAGCTGTGAACGACATTCTGGCGTCTATCGGTGAACCTC  
CGGTATCAACGCTGGAAGGTGACGCTAACGCAGATGCAGCGAACGCTCGGCGTATTCTCAACAAGATTAACCGACAG  
ATTCATCTCGTGGATGGACGTTCAACATTGAGGAAGGCATAACGCTACTACCTGATGTTTACTCCAACCTGATTGT  
ATACAGTGACGACTATTTATCCCTAATGTCTACTTCCGGTCAATCCATCTACGTTAACCGAGGTGGCTATGTGTATG  
ACCGAACGAGTCAATCAGACCGCTTTGACTCTGGTATTACTGTGAACATTATTTCGCTCTCCGCGACTACGATGAGATG

CTGAGTGTCTCCGTTACTGGATTGTACCAAGGCTTCCCCTCAGTTCAACAACCGATTCTTTGGGGCACCAGGAAAGT  
AGAGGGTGTACTCCAAGAAGAGGAAGATGAGGCTAGACGTCTCTGCATGGAGTATGAGATGGACTACGGTGGGTACA  
ATATGCTGGATGGAGATGCGTTCACTTCTGGTCTACTGACTCGCTAACATTAATAAATAAGGAGGCTCTAATGGCAC  
TCATTAGCCAATCAATCAAGAACTTGAAGGGTGGTATCAGCCAACAGCCTGACATCCTTTCGTTATCCAGACCAAGGG  
TCACGCCAAGTTAACGGTTGGTCTTCCGGAGACCGAGGGCCTCCAAAAGCGTCCACCTCTTGTTTTCTTAAATACACT  
TGGAGACAACGGTGCCTTAGGTCAAGCTCCGTACATCCACCTGATTAACCGAGATGAGCACGAACAGTATTACGCTG  
TGTTCACTGGTAGCGGAATCCGAGTGTTCGACCTTTCTGGTAACGAGAAGCAAGTTAGGTATCCTAACGGTTCCAAC  
TACATCAAGACCGCTAATCCACGTAACGACCTGCGAATGGTACTGTAGCAGACTATACGTTTCATCGTTAACCGTAA  
CGTTGTTGCACAGAAGAACAAGTCTGTCAACTTACCGAATTACAACCCTAATCAAGACGGATTGATTAACGTTT  
GTGGTGGTCAAGTATGGTAGGGAATAATTGTACACATTAACGGTAAAGACGTTGCGAAGTATAAGATACCCAGATGGT  
AGTCAACCTGAACACAGTAAACAATACGGATGCCAATGGTTAGCTGAAGAGTTAGCCAAGCAGATGCGCACTAAGT  
GTCTGATTGGACTGTAAATGTAGGGCAAGGGTTCATCCATGTGACCCGACCTAGTGGTCAACAGATTGACTCCTTCA  
CGACTAAAGATGGCTACGCAGACCAGTTGATTAACCCTGTGACCCACTACGCTCAGTCGTTCTCTAAGCTGCCACCT  
AATGCTCCTAACGGCTACATGGTGAAAATCGTAGGGGACGCTCTAAGTCTGCCGACCAGTATTACGTTCCGGTATGA  
CGCTGAGCGGAAAGTTTGGACTGAGACTTTAGGTTGGAACACTGAGGACCAAGTTCTATGGGAAACCATGCCACACG  
CTCTTGTGCGAGCCGCTGACGGTAATTTGACTTCAAGTGGCTTGAGTGGTCTCCTAAGTCTTGTGGTGCAGTTGAC  
ACCAACCCTTGGCCTTCTTTTGTGGTTCAAGTATTAACGATGTGTTCTTCTTCCGTAACCGCTTAGGATTCTTAG  
TGGGGAGAACATCATATTGAGTCGTACAGCCAAATACTTCAACTTCTACCCTGCGTCCATTGCGAACCTTAGTGATG  
ACGACCCTATAGACGTAGCTGTGAGTACCAACCGAATAGCAATCCTTAAGTACGCCGTTCCGTTCTCAGAAGAGTTA  
CTCATCTGGTCCGATGAAGCACAAATTCGTCTGACTGCCTCGGGTACTCTCACATCTAAGTCGGTTGAGTTGAACCT  
AACGACCCAGTTTACGCTACAGGACCGAGCGAGACCTTTTGGGATTGGGCGTAATGTCTACTTTGCTAGTCCGAGGT  
CCAGCTTACGCTCCATCCACAGGTACTACGCTGTGCAGGATGTGAGTTCGGTTAAGAATGCTGAGGACATTACATCA  
CACGTTCCCTAACCTACATCCCTAATGGTGTGTTGAGTATTTGCGGAAGTGGTACGGAAAACCTTCTGTTCCGGTACTATC  
TCACGGGGACCTAGTAAAATCTTCATGTACAAATTCCTGTACCTGAACGAAGAGTTAAGGCAACAGTCGTGGTCTC  
ATTGGGACTTTGGGGAAAACGTACAGGTTCTAGCTTGTGAGAGTATCAGCTCAGATATGTATGTGATTCTTCCGAAT  
GAGTTCAATACGTTCCCTAGCTAGAATCTCTTTCACTAAGAACGCCATTGACTTACAGGGAGAACCCTATCGTGCCTT  
TATGGACATGAAGATTGATACACGATTCCCTAGTGGAAACATAACAACGATGACACATTCACTACCTCTATTTCATATTC  
CAACAATTTATGGTGCAAACCTTCCGGAGGGGCAAAATCACTGTATTGGAGCCTGATGGTAAAGATAACCGTGTATTGAG  
CAACACTACGGCTGGGTGGAATAGCGACCTTGGCTGAGACTCAGCGGTAACCTGGAGGGACGCATGGTGTACATTTGG  
GTTCAACATTAACCTCGTATATGAGTTCTCTAAGTTCCTCATCAAGCAGACTGCCGACGACGGGTCTACCTCCACGG  
AAGACATTGGGCGCTTACAGTTACGCCGAGCGTGGGTTAACTACGAGAACTCTGGTACGTTTACATTTATGTTGAG  
AACCAATCGTCTAACTGGAAGTACACAATGGCTGGTGGCCGATTAGGCTCTAACACTCTGAGGGCTGGGAGACTGAA  
CTTAGGGACCGGACAATATCGATTCCCTGTGGTTGGTAACGCCAAGTTCAACACTGTATACATCTTGTGAGATGAGA  
CTACCCCTCTGAACATCATTGGGTGTGGCTGGGAAGGTAACACTTACGGAGAAGTTCCGGTATTTAATTAATATTT  
CTCCCTGTGGTGGCTCGAAATTAATACGACTCACTATAGGGAGAACAATACGACTACGGGAGGGTTTTCTTATGATG  
ACTATAAGACCTACTAAAAGTACAGACTTTGAGGTATTCACTCCGGCTCACCATGACATTCCTGAAGCTAAGGCTGC  
TGGTATTGAGCCGAGTTTCCCTGATGCTTCCGAGTGTGTCACGTTGAGCCTCTATGGGTTCCCTCTAGCTATCGGTG  
GTAACCTGCGGGGACCAGTGTGTTTGGTTACGAGCGACCAAGTGTGGCGACTTAGTGGAAAGGCTAAGCGAAAGTTC  
CGTAAGTTAATCATGGAGTATCGCGATAAGATGCTTGAAGAATGATACTCTTTGGAATTACGTATGGGTAGGCAA  
TACGTCCCACATTCGTTTCTCAAGACTATCGGTGCGGTATTCCATGAAGAGTACACACGAGATGGTCAATTTCACT  
TATTTACAATCACGAAAGGAGGATAAACCATATGTGTTGGGCAGCCGCAATACCTATCGCTATATCTGGCGCTCAGGC  
TATCAGTGGTCAGAACGCTCAGGCCAAAATGATTGCCGCTCAGACCGCTGCTGGTTCGTGCTCAAGCTATGGAAATCA  
TGAGGCAGACGAACATCCAGAATGCTGACCTATCGTTGCAAGCTCGAAGTAACTTGAGGAAGCGTCCGCCGAGTTG  
ACCTCACAGAACATGCAGAAGGTCCAAGCTATTGGGTCTATCCGAGCGGCTATCGGAGAGAGTATGCTTGAAGGTTT  
CTCAATGGACCGCATTAAAGCGAGTCACAGAAGGACAGTTCATTCCGGGAAGCCAATATGGTAACCTGAGAATCTCGCC  
GTGACTACCAAGCAATCTTCCGACAGCAACTTGGTGGTACTCAAAGTGTGCAAGTCAGATTGACGAAATCTATAAG  
AGCGAACAGAAAACAGAAGAGTAAGCTACAGATGGTTCTGACCCACTGGCTATCATGGGGTCTTCCGCTGCGAGTGC  
TTACGCATCCGGTGCCTTTCGACTCTAAGTCCACAACCTAAGGCACCTATTGTTGCCGCTAAAGGAACCAAGACGGGGA  
GGTAATGAGCTATGAGTAAAATGAACTGCCCCTTCAAGCGGCACAACCGGGACTCTCTCGGTTACGTGGTGGTGTCT  
GGAGGTATGGGCTATCGTGCAGCAACCCTCAGGCCGAACAGCCAAGGTCAAGCCTATTGGACACCATTGGTCCGTT  
CGCTAAGGCTGGTGCCGATATGTATACCGCTAAGGAACAACGAGCACGAGACCTAGCTGATGAACGCTCTAACGAGA  
TTATCCGTAAGCTGACCCCTGAGCAACGTCGAGAAGCTCTCAACAACCGGGACCCTTCTGTATCAGGATGACCCATAC  
GCTATGGAAGCACTCCGAGTCAAGACTGGTTCGTAACGCTGCGTATCTTGTGGACGATGACGTTATGCAGAAGATAAA  
AGAGGGTGTCTTCCGTAACGAGATGGAAGAGTATCGCCATAGTCGCCTTCAAGAGGGCGCTAAGGTATACG  
CTGAGCAGTTCGGCATCGACCCTGAGGACGTTGATTATCAGCGTGGTTTCAACGGGGACATTACCGAGCGTAACATC  
TCGCTGTATGGTGCATGATAACTTCTTGGCCAGCAAGCTCAGAAGGGCGCTATCATGAACAGCCGAGTGGAACT  
CAACGGTGTCTTCAAGACCCTGATATGCTGCGTCCGACTCTGCTGACTTCTTTGAGAAGTATATCGACAACG

GTCTGGTTACTGGCGCAATCCCATCTGATGCTCAAGCCACACAGCTTATAAGCCAAGCGTTCAGTGACGCTTCTAGC  
CGTGCTGGTGGTGTCTGACTTCCTGATGCGAGTCGGTGACAAGAAGGTAACACTTAACGGAGCCACTACGACTTACCG  
AGAGTTGATTGGTGAGGAACAGTGAACGCTCTCATGGTACAGCACAACGTTCTCAGTTTGAGACTGACGCGAAGC  
TGAACGAGCAGTATCGCTTGAAGATTAACCTCTGCGCTGAACCAAGAGGACCCAAGGACAGCTTGGGAGATGCTTCAA  
GGTATCAAGGCTGAACTAGATAAAGGTCCAACCTGATGAGCAGATGACACCACAACGTGAGTGGCTAATCTCCGCACA  
GGAACAAGTTCAGAATCAGATGAACGCATGGACGAAAGCTCAGGCCAAGGCTCTGGACGATTCCATGAAGTCAATGA  
ACAACTTGACGTAATCGACAAGCAATTCAGAAAGCGAATCAACGGTGAGTGGGTCTCAACGGATTTTAAGGATATG  
CCAGTCAACGAGAACACTGGTGAGTTCAGCATAGCGATATGGTTAACTACGCCAATAAGAAGCTCGCTGAGATTGA  
CAGTATGGACATTCCAGACGGTGCCAAGGATGCTATGAAGTTGAAGTACCTTCAAGCGGACTCTAAGGACGGAGCAT  
TCCGTACAGCCATCGGAACCATGGTCACTGACGCTGGTCAAGAGTGGTCTGCCGCTGTGATTAAACGGTAAGTTACCA  
GAACGAACCCAGCTATGGATGCTCTGCGCAGAATCCGCAATGCTGACCCTCAGTTGATTGCTGCGCTATACCCAGA  
CCAAGCTGAGCTATTCTGACGATGGACATGATGGACAAGCAGGGTATTGACCCTCAGGTTATTCTTGATGCCGACC  
GACTGACTGTTAAGCGGTCCAAAGAGCAACGCTTTGAGGATGATAAAGCATTGAGTCTGCACTGAATGCATCTAAG  
GCTCCTGAGATTGCCCGTATGCCAGCGTCACTGCGCGAATCTGCACGTAAGATTTATGACTCCGTTAAGTATCGCTC  
GGGGAACGAAAGCATGGCTATGGAGCAGATGACCAAGTTCCTTAAGGAATCTACCTACACGTTCACTGGTGATGATG  
TTGACGGTGATACCGTTGGTGTGATTCTAAGAATATGATGCAGGTTAACTCTGACCCGAAATCATGGGAGCAAGGT  
CGGGATATTCTGGAGGAAGCACGTAAGGGAATCATTGCGAGCAACCCTTGATAACCAATAAGCAACTGACCATGTA  
TTCTCAAGGTGACTCCATTTACCTTATGGACACCACAGGTCAAGTCAGAGTCCGATACGACAAAGAGTTACTCTCGA  
AGGTCTGGAGTGAGAACCAGAAGAACTCGAAGAGAAAGCTCGTGAGAAGGCTCTGGCTGATGTGAACAAGCGAGCA  
CCTATAGTTGCCGCTACGAAGGCCCGTGAAGCTGCTGCTAAACGAGTCCGAGAGAAACGTAACAGACTCCTAAGTT  
CATCTACGGACGTAAGGAGTAACATAAAGGCTACATAAAGGAGGCCCTAAATGGATAAGTACGATAAGAACGTACCAAG  
TGATTATGATGGTCTGTTCCAAAAGGCTGCTGATGCCAACGGGGTCTCTTATGACCTTTTACGTAAGTGCCTTGGA  
CAGAATCACGATTTGTGCCTACAGCAAAATCTAAGACTGGACCATTAGGCATGATGCAATTTACCAAGGCAACCGCT  
AAGGCCCTCGGTCTGCGAGTTACCGATGGTCCAGACGACGACCGACTGAACCCTGAGTTAGCTATTAATGCTGCCGC  
TAAGCAACTTGCAGGTCTGGTAGGGAAAGTTTATGGCGATGAACTCAAAGCTGCCCTTGCGTACAACCAAGGCGAGG  
GACGCTTGGGTAATCCACAACCTTGAGGCGTACTCTAAGGGAGACTTCGCATCAATCTCTGAGGAGGGACGTAAC  
ATGCGTAACCTTCTGGATGTTGCTAAGTCACCTATGGCTGGACAGTTGGAACTTTTGGTGGCATAACCCCAAAGGG  
TAAAGGCATTCCGGCTGAGGTAGGATTGGCTGGAATGCTGATGAGTACCAAGCAGAAAGTAACACAGGAATCTCTGAGTCCA  
CAAGTTTTGACGTTAAGGGTATCGAACAGGAGGACTACGGCGAAACCATTTCGCCAAGGACTTTTGGGAGACCCAGGA  
GAAACACTTGACGAGTACAACAGTCGTTCAACCTTCTCGGATCAAAAATGCTGCCGAAGCTGAACTCTCCAACCTC  
AGTCGCTGGGATGGCTTTCCGCTGCTGGTCTCGATAATGGTTTTGATGTGTTTTAAGACACCATTACGCCGACTC  
GCTGGAACCTCTCACATCTGGACTCCAGAGGAGTTAGAGAAGATTGCAACAGAGGTTAAGAACCCTGCGTACATCAAC  
GTTGTAACCTGGTGGTTCCTGAGAACCTCGATGACCTCATTAAATTTGGCTAACGAGAACCTTTGAGAATGACTCCCG  
CGCTGCCGAGGCTGGCCTAGGTGCCAAACTGAGTGTGGTATTATTGGTGTGGTGTGGACCCGCTTAGCTATGTTT  
CTATGGTGGTGTCACTGGTAAGGGCTTTAAGTTAATCAATAAGGCTCTTGTAGTTGGTGCCGAAAGTGTGCTCTG  
AACGTTGCATCCGAAGGTCTCCGTACCTCCGTAGCTGGTGGTACGCGAGACTATGCGGGTGTGCTTGGTGGCTT  
TGTGTTTTGGCGCAGGCATGTCTGCAATCAGTGACGCTGTAGCTGCTGGACTGAAACGCAGTAAACCAGAAGCTGAGT  
TCGACAATGAGTTCATCGGTCTATGATGCGATTGGAAGCCCGTGAGACAGCACGAAACGCCAACTCTGCGGACCTC  
TCTCGGATGAACACTGAGAACATGAAGTTTGAAGGTGAACATAATGGTGTCCCTTATGAGGACTTACCAACAGAGAG  
AGGTGCCGTGGTGTACATGATGGCTCCGTTCTAAGTGCAAGCAACCCAATCAACCCTAAGACTCTAAAAGAGTTCT  
CCGAGGTTGACCCTGAGAAGGCTGCGCGAGGAATCAAACCTGGCTGGGTTACCGGAGATTGGCTTGAAGACCTTGGGG  
TCTGACGATGCTGACATCCGTAGAGTGGCTATCGACCTCGTTCGCTCTCCTACTGGTATGCAGTCTGGTGCCTCAGG  
TAAGTTCGGTGCAACAGCTTCTGACATCCATGAGAGACTTCATGGTACTGACCAGCGTACTTATAATGACTTGTACA  
AAGCAATGTCTGACGCTATGAAAGACCCTGAGTTCCTACTGGCGGCGCTAAGATGTCCCGTGAAGAACTCGATAC  
ACTATCTACCGTAGAGCGGCACTAGCTATTGAGCGTCCAGAACTACAGAAGGCACACTCACTCCGTCTGAGAGAATCGT  
TATGGACATCATTAAAGCGTCACTTTGACACCAAGCGTGAACCTATGGAAAACCCAGCAATATTCCGGTAACACAAAG  
CTGTGAGTATCTTCCCTGAGAGTCGCCACAAAGGTACTTACGTTCCCTCACGTATATGACCCTCATGCCAAGGCGCTG  
ATGATTCAACGCTACGGTGCCGAAGGTTTGAGGAAGGGATTGCCGCTCATGGATGAACAGCTACGTCTCCAGACC  
TGAGGTCAAGGCCAGAGTCGATGAGATGCTTAAGGAATTACAGGGGTGAAGGAAGTAACACCAGAGATGGTAGAGA  
AGTACGCTATGGATAAGGCTTATGGTATCTCCCACTCAGACCAGTTCACCAACAGTTCATAATAGAAGAGAACATT  
GAGGGCTTAGTAGGTATCGAGAATAACTCATTCTTGGAGCACGTAACCTGTTTTGATTTCGGACCTATCCATCACTAT  
GCCAGACGGACAGCAATTTCTCAGTGAATGACCTAAGGGACTTCGATATGTTCCGCATCATGCCAGCGTATGACCGCC  
GTGTCAATGGTGACATCGCCATCATGGGGTCTACTGGTAAAACCTAAGGAACCTAAGGATGAGATTTTGGCTCTC  
AAAGCGAAAGCTGAGGGAGACGGTAAGAAGACTGGCGAGGTACATGCTTTAATGGATAACCGTTAAGATTCTTACTGG  
TCGTGCTAGACGCAATCAGGACACTGTGTGGGAAACCTCACTGCGTGCCATCAATGACCTAGGGTCTTCCGCTAAGA  
ACGCCTACATGGGTGCTCAGAACATTACGGAGATTGCTGGGATGATTGTCAGTGGTAACGTTTCGTGCTCTAGGGCAT  
GGTATCCCAATTTCTGCGTGATACACTCTACAAGTCTAAACCAGTTTTAGCTAAGGAACCTAAGGAACCTCCATGCGTC

TCTGTTTCGGGAAGGAGGTGGACCAGTTGATTTCGGCCTAAACGTGCTGACATTGTGCAGCGCCTAAGGGAAGCAACTG  
ATACCGGACCTGCCGTGGCGAACATCGTAGGGACCTTGAAGTATTCAACACAGGAAGTGGCTGCTCGCTCTCCGTGG  
ACTAAGCTACTGAACCGAACCCTAACTACCTTCTGGATGCTGCGCGTCAAGGTATGCTTGGGGATGTTATTAGTGC  
CACCTAACAGGTAAGACTACCCGCTGGGAGAAAGAAGGCTTCTTCGTGGTGCCTCCGTAACCTCTGAGCAGATGG  
CTGGCATCAAGTCTCTCATCAAGGAACATATGGTACGCGGTGAGGACGGGAAGTTTACCGTTAAGGACAAGCAAGCG  
TTCTCTATGGACCCACGGGCTATGGACTTATGGAGACTGGCTGACAAGGTAGCTGATGAGGCAATGCTGCGTCCACA  
TAAGGTGTCCTTACAGGATTTCCCATGCGTTCGGAGCACTAGGTAAGATGGTTATGCAGTTTAAAGTCTTTCCTATCA  
AGTCCCTTAACTCTAAGTTTCTGCGAACCTTCTATGATGGATAACAAGAACAACCGAGCGATTGACGCTGCGCTGAGC  
ATCATCACCTCTATGGGTCTCGCTGGTGGTTTTCTATGCTATGGCTGCACACGTCAAAGCATAACGCTCTGCCTAAGGA  
GAAACGTAAGGAGTACTTGGAGCGTGCCTGGACCCAAACCTATGATTGCCACGCTGCGTTATCTCGTAGTTCTCAAT  
TGGGTGCTCCTTTGGCTATGGTTGACCTAGTTGGTGGTTTTAGGGTTTCGAGTCCCTCAAGATGGCTCGCTCTACG  
ATTCTACCTAAGGACACCGTGAAGGAACGTGACCCAAACAACCGTACACCTCTAGAGAGGTAATGGGCGCTATGGG  
TTCAAACCTTCTGGAACAGATGCCTTTCGGCTGGCTTTGTGGCTAACGTAGGGGCTACCTTAATGAATGCTGCTGGCG  
TGGTCAACTCACCTAATAAAGCAACCGAGCAGGACTTTCATGACTGGTCTTATGAACTCCACAAAAGAGTTAGTACCG  
AACGACCCATTGACTCAACAGCTTGTGTTGAAGATTTATGAGGCGAACGGTGTAACTTGGAGGAGCGTAGGAAATA  
ATACGACTCACTATAGGGAGAGGCGAAATAATCTTCTCCCTGTAGTCTCTTAGATTTACTTTAAGGAGGTCAAATGG  
CTAACGTAATTTAAACCGTTTTGACTTACCAGTTAGATGGCTCCAATCGTGATTTTAAATATCCCGTTTTGAGTATCTA  
GCCCGTAAGTTTCGTAGTGGTAACTCTTATTGGTGTAGACCGAAAGGTCCTTACGATTAATACAGACTATCGCTTTGC  
TACACGTAATACTATCTCTGACAAAGGCTTGGGGTCCAGCCGATGGCTACACGACCATCGAGTTACGTCGAGTAA  
CCTCCACTACCGACCGATTGGTTGACTTTACGGATGGTTCAATCCTCCGCGCGTATGACCTTAAAGTTCGCTCAGATT  
CAAACGATGCACGTAGCGGAAGAGGCCCGTACCTCACTACGGATACTATCGGTGTCAATAACGATGGTCACTTGGGA  
TGCTCGTGGTTCGATGCAATTTGTAACCTAGCGAACGCCGTGGATGACCGCGATGCTGTTCCGTTTTGGTCAACTAAAGA  
CCATGAACCAGAACTCATGGCAAGCACGTAATGAAGCCTTACAGTTCGGTAATGAGGCTGAGACTTTTCAGAAACCAA  
GCGGAGGGCTTTAAGAACGAGTCCAGTACCAACGCTACGAACACAAGCAGTGGCGCAATGAGACCAAGGGTTTTCCG  
AGGCGAAGCCAAGCGGTTCAAGAATACGGCTGGTCAATACGCTACATCTGCTGGGAACTCTGCTTCCGCTGCGCATC  
AATCTGAGGTAACGCTGAGAATCTGCCACAGCATCCGCTAACTCTGCTCATTTGGCAGAACAGCAAGCAGACCGT  
GCGGAACGTGAGGCAGACAAGCTGGAAAATTACAATGGATTGGCTGGTGAATGATAAGGTAGATGGAACCAATGT  
GTACTTGGAAAGGAAATATTACGCTAACGGGCGCCTTTACATGACCACAACCGTTTTGACTGTGGCCAGTATCAAC  
AGTTCTTTGGTGGTGTACTAATCGTTACTCTGTCTGATGGAGTGGGAGATGAGAACCGGATGGCTAGTATGTTCAA  
CGTAGAGATGGACAACAGCGATAGGCGGTAACATCCAGTTAGTAGTAAACGGACAGATCATCACCAAGGTGGAGC  
CATGACCGGTGAGCTAAAATTGCAGAATGGGCATGTTCTTCAATTAGAGTCCGCATCCGACAAGGCGCACTATATTC  
TATCTAAAGATGGTAACAGGAATAACTGGTACATTGGTAGAGGGTACAGATAACAACAATGACTGTACCTTCCACTCC  
TATGTACATGGTACGACCTTAACTCAAGCAGGACTATGCAGTAGTTAAACAACACTTCCACGTAGGTACAGGCCGT  
TGTGGCCACTGATGGTAATATTCAAGGTAAGTGGGGAGGTAAATGGCTGGATGCTTACCTACGTGACAGCTTCG  
TTGCGAAGTCCAAGGCGTGGACTCAGGTGTGGTCTGGTAGTGTGGCGGTGGGGTAAAGTGTGACTGTTTTACAGGAT  
CTCCGCTTCCGCAATATCTGGATTAAGTGTGCCAACAACCTTGGAACTTCTTCCGTAAGTGGCCCCGATGGAATCTA  
CTTCATAGCCTCTGATGGTGGATGGTTACGATTCCAATACACTCCAACGGTCTCGGATTCAAGAATATTGCAGACA  
GTCGTTTCAGTACCTAATGCAATCATGGTGGAGAACGAGTAATTGGTAAATCACAAGGAAAGACGTGTAGTCCACGGA  
TGGACTCTCAAGGAGGTACAAGGTGCTATCATTAGACTTTAAACAACGAATTGATTAAGGCTGCTCCAATTGTTGGGA  
CGGGTGTAGCAGATGTTAGTGTGCTGACTGTTCTTTGGGTTAAGCCTTAAACGAATGGTCTACGTTGCTGCTATCGCC  
TACACAGTGGTTCAGATTGGTGCCAAGGTAGTCGATAAGATGATTGACTGGAAGAAAGCCAATAAGGAGTGATATGT  
ATGGAAAAGGATAAGAGCCTTATTACATTCTTAGAGATGTTGGACACTGCGATGGCTCAGCGTATGCTTGGCGACCT  
TTCGGACCATGAGCGTTCGCTCTCCGCAACTCTATAATGCTATTAACAACTGTTAGACCGCCACAAGTTCCAGATTG  
GTAAGTTGCAGCCGGATGTTACATCTTAGGTGGCCTTGTGGTGTCTTGAAGAGTACAAAGAGAAAGTCCGGTGT  
AACGGTCTTACGGATGATGATATTTACACATTACAGTATATACTCAAGGCCACTACAGATAGTGGTCTTTATGTAT  
GTCATTGCTTATACGAGATGCTCCTACGTGAAATCTGAAAGTTAACGGGAGGCATTATGCTAGAATTTTTACGTAAG  
CTAATCCCTTGGGTTCTCGTGGGATGCTATTCGGGTTAGGATGGCATCTAGGGTCAGACTCAATGGACGCTAAATG  
GAAACAGGAGGTACACAATGAGTACGTTAAGAGAGTTGAGGCTGCGAAGAGCACTCAAAGAGCAATCGATGCGGTAT  
CTGCTAAGTATCAAGAAGACCTTCCGCGCTGGAAGGGAGCACTGATAGGATTAATTTCTGATTTGCGTAGCGACAAT  
AAGCGGTTGCGCGTCAGAGTCAAACCTACCGGAACCTCCGATGGTCAAGTGTGGATTTCGAGCCTGATGGTTCGAGCCGA  
ACTTGACGACCGAGATGCTAAACGTATTCTCGCAGTGACCCAGAAGGGTGACGCATGGATTTCGTGCGTTACAGGATA  
CTATTTCGTGAACTGCAACGTAAGTAGGAAATCAAGTAAGGAGGCAATGTGTCTACTCAATCCAATCGTAATGCGCTC  
GTAGTGGCGCAACTGAAAGGAGACTTCGTGGCGTTTCTATTTCGTCTTATGGAAGGCGCTAAACCTACCGGTGCCAC  
TAAGTGTGAGATTGACATGGCTAAGGTGCTGGCGAATGGAGACAACAAGAAGTTCATCTTACAGGCTTTCCGTGGTA  
TCGGTAAGTTCGTTTACATGATGTCGTTTCGTTGTGGTCTTATGGAGAGACCCTCAGTTGAAGATACTTATCGTA  
TCAGCCTCTAAGGAGCGTGCAGACGCTAACTCCATCTTTATTAAGAACATCATTGACCTGCTGCCATTCCTATCTGA  
GTTAAAGCCAAGACCCGGACAGCGTACTCGGTAATCAGCTTTGATGTAGGCCAGCCAATCCTGACCACTCTCCTA

GTGTGAAATCAGTAGGTATCACTGGTCAGTTAACTGGTAGCCGTGCTGACATTATCATTGCGGATGACGTTGAGATT  
CCGTCTAACAGCGCAACTATGGGTGCCCCTGAGAAGCTATGGACTCTGGTTTCCAGGAGTTTCGCTGCGTTACTTAAACC  
GCTGCCTTCTCTCGCGTTATCTACCTTGGTACACCTCAGACAGAGATGACTCTCTATAAGGAACCTTGAGGATAACC  
GTGGGTACACAACCATTATCTGGCCTGCTCTGTACCCAAGGACACGTGAAGAGAACCTCTATTACTCACAGCGTCTT  
GCTCCTATGTTACGCGCTGAGTACGATGAGAACCCTGAGGCACCTTGCTGGGACTCCAACAGACCCAGTGCCTTTGA  
CCGTGATGACCTGCGCGAGCGTGAGTTGGAATACGGTAAGGCTGGCTTTACGCTACAGTTTCATGCTTAAACCCTAAC  
TTAGTGATGCCGAGAAGTACCCGCTGAGGCTTCGTGACGCTATCGTAGCGGCCTTAGACTTAGAGAAGGCCCAATG  
CATTACCAGTGGCTTCCGAACCGTCAGAACATCATTGAGGACCTTCCTAACGTTGGCCTTAAGGGTGATGACCTGCA  
TACGTACCACGATTGTTCCAACAACCTCAGGTGAGTACCAACAGAAGATTCTGGTCATTGACCCCTAGTGGTCGCGGTA  
AGGACGAAACAGGTTACGCTGTGCTGTACACACTGAACGGTTACATCTACCTTATGGAAGCTGGAGGTTTCCGTGAT  
GGCTACTCCGATAAAGACCCCTTGAGTTACTCGCTAAGAAGGCAAGCAATGGGGAGTCCAGACGGTTGTCTACGAGAG  
TAACTTCCGGTGACGGTATGTTCCGGTAAGGTATTGAGTCTTACCTTCTTAAACACCACAACCTGTGCGATGGAAGAGA  
TTCGTGCCCGTGGTATGAAAGAGATGCGTATTTGCGATACCCTTGAGCCAGTCATGCAGACTCACCGCCTTGTAATT  
CGTGATGAGGTCATTAGGGCCGACTACCAGTCCGCTCGTGACGTAGACGGTAAGCATGACGTTAAGTACTCGTTGTT  
CTACCAGATGACCCGATCACTCGTGAGAAAGGCGCTCTGGCTCATGATGACCGATTGGATGCCCTTGCGTTAGGCA  
TTGAGTATCTCCGTGAGTCCATGCAGTTGGATTCCGTTAAGGTCGAGGGTGAAGTACTTGCTGACTTCCCTGAGGAA  
CACATGATGCGTCTACGGTTGCTGCTACGCATATCATTGAGATGTCTGTGGGAGGAGTTGATGTGTACTCTGAGGA  
CGATGAGGGTTACGGTACGTCTTTTATTGAGTGGTGATTTATGCATTAGGACTGCATAGGGATGCACTATAGACCAC  
GGATGGTCAGTTCTTTAAGTTACTGAAAAGACACGATAAATTAATACGACTCACTATAGGGAGAGGAGGGACGAAAG  
GTTACTATATAGATACTGAATGAATACTTATAGAGTGCATAAAGTATGCATAATGGTGTACCTAGAGTGACCTCTAA  
GAATGGTGATTATATTGTATTAGTATCACCTTAACTTAAAGGACCAACATAAAGGGAGGAGACTCATGTTCCGCTTAT  
TGTTGAACCTACTGCGGCATAGAGTACCTACCGATTTCTTGTGGTACTTTGTGCTGCCCTTGGGTACGCATCTCTT  
ACTGGAGACCTCAGTTCACTGGAGTCTGTGCTTTGCTCTATACTCACTTGTAGCGATTAGGGTCTTCCCTGACCGACT  
GATGGCTCACCGAGGGATTACGCGGTATGATTGCATCACACCCTTCATCCCTATAGAGTCAAGTCCCTAAGGTATAC  
CCATAAAGAGCCTCTAATGGTCTATCCTAAGGTCTATACCTAAAGATAGGCCATCCTATCAGTGTACCTAAAGAGG  
GTCTTAGAGAGGGCCTATGGAGTTCCTATAGGGTCCCTTAAAAATATACCATAAAAAATCTGAGTGACTATCTCACAGT  
GTACGGACCTAAAGTTCCTCCCATAGGGGGTACCTAAAGCCCAGCCAATCACCTAAAGTCAACCTTCGGTTGACCTTG  
AGGGTTCCTCAAGGGTTGGGGATGACCTTTGGGTTTGTCTTTGGGTGTTACTTCCCCATAGGGGGTACCTAAAGCC  
CAGCCAACTCACCTAAAGTCAACCTTCGGTTGACCTTGAGGGTTCCTTAAAGGGTTGGGGATGACCTTGGGTTTGTCT  
TTGGGTGTTACCTTGAGTGTCTCTGTGTCCCTATCTGTTACAGTCTCCTAAAGTATCCTCCTAAAGTCACTCCT  
AACGTCCATCCTAAAGCCAACACCTAAAGCCTACACCTAAAGACCCATCAAGTCAACGCCTATCTTAAAGTTTAAAC  
ATAAAGACCAGACCTAAAGACCAGACCTAAAGACACTACATAAAGACCAGACCTAAAGACGCCTTGTTGTTAGCCAT  
AAAGTGATAACCTTTAATCATTGTCTTTATTAATACAACCTCACTATAAGGAGAGACAACCTTAAAGAGACTTAAAGA  
TTAATTTAAAATTTATCAAAAAGAGTATTGACTTAAAGTCTAACCTATAGGATACTTACAGCCATCGAGAGGGACAC  
GGCGAATAGCCATCCCAATCGACACCGGGGTCAACCGGATAAGTAGACAGCCTGATAAGTTCGCACGAAAAACAGGTA  
TTGACAACATGAAGTAACATGCAGTAAGATACAAATCGCTAGGTAACACTAGCAGCGTCAACCGGGCGCACAGTGCC  
TTCTAGGTGACTTAAGCGCACACGGCACATAAGGTGAAACAAAACGGTTGACAACATGAAGTAAACACGGTACGAT  
GTACCACATGAAACGACAGTGAGTACCACACTGAAAGGTGATGCGGTCTAACGAAACCTGACCTAAGACGCTCTTT  
AACAATCTGGTAAATAGCTCTTGAGTGCATGACTAGCAGATAACTCAAGGGTATCGCAAGGTGCCCTTTATGATATT  
CACTAATAACTGCACGAGGTAACACAAGATGGCTATGTCTAACATGACTTACAACAACGTTTTTCGACCACGCTTACG  
AAATGCTGAAAGAAAACATCCGTTATGATGACATCCGTGACACTGATGACCTGCACGATGCTATTCACATGGCTGCC  
GATAATGCAGTTCGCGACTACTACGCTGACATCTTTAGCGTAATGGCAAGTGAGGGCATTGACCTTGAGTTTGAAGA  
CTCTGGTCTGATGCCTGACACCAAGGACGTAATCCGCATCCTGCAAGCGCGTATCTATGAGCAATTAACGATTGACC  
TCTGGGAAGACGCAGAAGACTTGCTCAATGAATACTTGGAGGAAGTTCGAGGAGTACGAGGAGGATGAAGAGTAATGT  
CTACTACCAACGTGCAATACGGTCTGACCGCTCAAACGTACTTTTCTATAGCGACATGGTGCCTGTGGCTTTAAC  
TGGTCACTCGCAATGGCACAGCTCAAAGAACTGTACGAAAACAACAAGGCAATAGCTTTAGAATCTGCTGAGTGATA  
GACTCAAGGTGCTCCTAGCGAGTGGCCTTTATGATTATCACTTTACTTATGAGGGAGTAATGTATATGCTTACTAT  
CGGTCTACTCACCGCTCTAGGTCTAGCTGTAGGTGCATCCTTTGGGAAGGCTTTAGGTGTAGCTGTAGGTTCTACT  
TTACCGCTTGATCATCATAGGAATCATCAAAGGGGCACTACGCAAATGATGAAGCACTACGTTATGCCAATCCACA  
CGTCCAACGGGGCAACCGTATGTACACCTGATGGGTTTCGCAATGAAACAACGAATCGAACGCCTTAAAGCGTGAACCT  
CGCATTAACCGCAAGATTAACAAGATAGGTTCCGGCTATGACAGAACGCACTGATGGCTTAAAGAAAGGTTATATGC  
CCAATGGCACACTATACGCTGCAAATCGGCGAATAGTGAGAACTTGGCGAGAGAACAACCTCGAACGCCGCAAGGAA  
CAAGAGAGGGCGGCGTGGCATAGACGAAAGGAAAAGGTTAAAGCCAAGAACTCGCCGCACTTGAACAGGCACTAGC  
CAACACACTGAACGCTATCTCATAACGAACATAAAGGACACAATGCAATGAACATTACCGACATCATGAACGCTATC  
GACGCAATCAAAGCACTGCCAATCTGTGAACCTTGACAAGCGTCAAGGTATGCTTATCGACTTACTGGTCGAGATGGT  
CAACAGCGAGACGTGTGATGGCGAGCTAACCGAATAAATCAGGCACCTTGAGCATCAAGATTGGTGGACTACCTTGA  
AGTGTCTCACGGCTGACGCAGGGTTCAAGATGCTCGGTAATGGTCACCTTCTCGGCTGCTTATAGTACCCCGCTGCTA

CCTAACAGAGTGATTAAGGTGGGCTTTAAGAAAGAGGATTTCAGGGCGCAGCCTATAACCGCATTCTGCCGCATGTATCA  
GGGTCGTCCTGGTATCCCTAACGTCTACGATGTACAGCGCCACGCTGGATGCTATAACGGTGGTACTTGACGCACTTA  
AGGATTGCGAGCGTTTTCAACAATGATGCCATTATAAATACGCTGAGATTGCAAGCGACATCATTGATTGCAATTCCG  
GATGAGCATGATGAGTTAACTGGATGGGATGGTGAGTTTTGTTGAAACTTGTAAACTAATCCGCAAGTTCTTTGAGGG  
CATCGCCTCATTGACATGCATAGCGGGAACATCATGTTCTCAAATGGAGACGTACCATAACATCACCGACCCGGTAT  
CATTCTCGCAGAAGAAAGACGGTGGCGCATTACAGCATCGACCCTGAGGAACTCATCAAGGAAGTCGAGGAAGTCGCA  
CGACAGAAAGAAATTGACCGCGCTAAGGCCCGTAAAGAAGCTCACGAGGGGGCGCTTAGAGGCACGCAGATTCAAACG  
TCGCAACCGCAAGGCACGTAAAGCACACAAAGCTAAGCGCGAAAGAATGCTTGCTGCGTGGCGATGGGCTGAACGTC  
AAGAACGGCGTAACCATGAGGTAGCTGTAGATGTACTAGGAAGAACCAATAACGCTATGCTCTGGGTCAACATGTTT  
TCTGGGGACTTTAAGGGCTTGAGGAACGAATCGCGCTGCCTGGCGTAATGCTGACCGGATGGCTATCGCTAATGG  
TCTTACGCTCAACATTGATAAGCAACTTGACGCAATGTTAATGGGCTGATAGTCTTATCTTACAGGTCATCTGCGGG  
TGGCCTGAATAGGTACGATTTACTAACTGGAAGAGGCACATAAATGAACACGATTAACATCGCTAAGAACGACTTCTC  
TGACATCGAACTGGCTGCTATCCCGTTCAACACTCTGGCTGACCATTACGGTGAGCGTTTTAGCTCGCGAACAGTTGG  
CCCTTGAGCATGAGTCTTACGAGATGGGTGAAGCACGCTTCCGCAAGATGTTTGAGCGTCAACTTAAAGCTGGTGAG  
GTTGCGGATAACGCTGCCGCCAAGCCTCTCATCACTACCCTACTCCCTAAGATGATTGCACGCATCAACGACTGGTT  
TGAGGAAGTGAAAGCTAAGCGCGGCAAGCGCCGACAGCCTTCCAGTTCCTGCAAGAAATCAAGCCGGAAGCCGTAG  
CGTACATCACCATTAAGACCACTCTGGCTTGCCTAACCAAGTGTGACAATACAACCGTTTACGGCTGTAGCAAGCGCA  
ATCGGTGCGGCCATTGAGGACGAGGCTCGCTTCCGGTCGTATCCGTGACCTTGAAGCTAAGCACTTCAAGAAAAACGT  
TGAGGAACAACCTCAACAAGCGCGTAGGGCACGTCTACAAGAAAGCATTATGCAAGTTGTCGAGGCTGACATGCTCT  
CTAAGGGTCTACTCGGTGGCGAGGCGTGGTCTTCCGTGGCATAAGGAAGACTCTATTATGATAGGAGTACGCTGCATC  
GAGATGCTCATTGAGTCAACCGGAATGGTTAGCTTACACCGCCAAAATGCTGGCGTAGTAGGTCAAGACTCTGAGAC  
TATCGAACTCGCACCTGAATACGCTGAGGCTATCGCAACCCGTGAGGTGCGCTGGCTGGCATCTCTCCGATGTTCC  
AACCTTGCGTAGTTCCTCCTAAGCCGTGGACTGGCATTACTGGTGGTGGCTATTGGGCTAACGGTCGTCGTCCTCTG  
GCGCTGGTGCCTACTCACAGTAAGAAAGCACTGATGCGCTACGAAGACGTTTACATGCCTGAGGTGTACAAAGCGAT  
TAACATTGCGCAAAACACCGCATGGAAAATCAACAAGAAAGTCCCTAGCGGTGCGCAACGTAATCACCAAGTGAAGC  
ATTGTCCGGTCGAGGACATCCCTGCGATTGAGCGTGAAGAACTCCCGATGAAACCGGAAGACATCGACATGAATCCT  
GAGGCTCTCACCGCGTGGAAACGTGCTGCCGCTGCTGTGTACCAGCAAGGACAAGGCTCGCAAGTCTCGCCGTATCAG  
CCTTGAGTTTACATGTTGAGCAAGCCAATAAGTTCTAACCATAAGGCCATCTGGTTCCCTTACAACATGGACTGGC  
GCGGTGCTGTTTACGCTGTGTCAATGTTCAACCCGCAAGGTAACGATATGACCAAAGGACTGCTTACGCTGGCGAAA  
GGTAAACCAATCGGTAAAGGAAGTTACTACTGGCTGAAAATCCACGGTGCAAACTGTGCGGGTGTGATAAGGTTCC  
GTTCCCTGAGCGCATCAAGTTTATTGAGGAAAACCACGAGAACATCATGGCTTGCGCTAAGTCTCCACTGGAGAACA  
CTTGGTGGGCTGAGCAAGATTCTCCGTTCTGCTTCCCTTGCGTTTCTGCTTTGAGTACGCTGGGGTACAGCACACGGC  
CTGAGCTATAACTGCTCCCTTCCGCTGGCGTTTGACGGGTCTTGCTCTGGCATCCAGCACTTCTCCGCGATGCTCCG  
AGATGAGGTAGGTGGTCGCGCGGTTAACTTGCTTCCCTAGTGAAACCGTTTACGGACATCTACGGGATTGTTGCTAAGA  
AAGTCAACGAGATTCTACAAGCAGACGCAATCAATGGGACCGATAACGAAGTAGTTACCGTGACCGATGAGAACACT  
GGTGAATCTCTGAGAAAGTCAAGCTGGGCACTAAGGCACTGGCTGGTCAATGGCTGGCTTACGGTGTACTCGCAG  
TGTGACTAAGCGTTCAGTCATGACGCTGGCTTACGGGTCCAAAGAGTTCGGCTTCCGTCAACAAGTGTGGAAGATA  
CCATTACGCCAGCTATTGATTCCGGCAAGGGTCTGATGTTCACTCAGCCGAATCAGGCTGCTGGATAACATGGCTAAG  
CTGATTTGGGAATCTGTGAGCGTGACGGTGGTAGCTGCGGTTGAAGCAATGAACTGGCTTAACTGCTGCTAAGCT  
GCTGGCTGCTGAGGTCAAAGATAAGAAGACTGGAGAGATTCTTCCGCAAGCGTTGCGCTGTGCATTGGGTAACCTCTG  
ATGGTTTCCCTGTGTGGCAGGAATACAAGAAGCCTATTACAGACGCGCTTGAACCTGATGTTTCCCTCGGTGAGTTCCGC  
TTACAGCCTACCATTAACACCAACAAAGATAGCGAGATTGATGCACACAAACAGGAGTCTGGTATCGCTCCTAACTT  
TGTACACAGCCAAGACGGTAGCCACCTTCGTAAGACTGTAGTGTGGGCACACGAGAAGTACGGAATCGAATCTTTTG  
CACTGATTCACGACTCCTTCCGGTACCATTCCGGCTGACGCTGCGAACCTGTTCAAAGCAGTGCGCGAAACTATGGTT  
GACACATATGAGTCTTGTGATGTACTGGCTGATTTCTACGACCAGTTCGCTGACCAGTTGCACGAGTCTCAATTGGA  
CAAAATGCCAGCACTTCCGGCTAAAGGTAACCTGAACCTCCGTGACATCTTAGAGTCGGACTTCCGCTTCCGCTAAC  
GCCAAATCAATACGACTCACTATAGAGGGACAAAACCTCAAGGTCATTGCAAGAGTGGCCTTTATGATTGACCTTCTT  
CCGGTTAATACGACTCACTATAGGAGAACCTTAAAGGTTTAACTTTAAGACCCTTAAAGTGTAAATTAGAGATTTAAAT  
TAAAGAATTACTAAGAGAGGACTTTAAGT

## Supplemental Data S2: Simplified USER Primer Scan

### **Introduction: How This Simplified Code Differs from the Full Pipeline**

The full USER primer design pipeline used in this project was designed to operate at genome scale, iterating across multiple fragment junctions, scanning both forward and reverse primer pairs, integrating primer pairing rules across adjacent fragments, and generating a complete assembly plan.

To make the **core algorithm transparent**, the code below is a **deliberately simplified version** that demonstrates only the essential computation performed at a *single junction in a single genome sequence*:

#### **What was removed**

- Iteration over multiple fragments and worksheets
- Paired forward/reverse junction coordination
- Output formatting and spreadsheet bookkeeping
- Redundant constraint checks used only for large scale automation

#### **What is preserved**

- Sliding window scan of a **single genome sequence**
- Evaluation of **multiple primer lengths**
- Enforcement of **USER specific primer design constraints**
- Lookup of **UDG excision efficiency** using a 7 base motif table
- Selection of the **highest efficiency overlap regions**

Conceptually, this code answers the question:

“Given a genome sequence at a specific junction, where are the best USER compatible overhangs based on UDG excision efficiency and biophysical constraints?”

### **Simplified USER Primer Scan (Single Genome, Single Junction)**

```
=====
' SIMPLIFIED USER PRIMER SCAN
' Purpose:
'   Demonstrate how a single genome sequence is scanned to identify
'   USER-compatible primer overlap regions using UDG efficiency scoring.
'
' This version:
'   - Scans one DNA sequence
'   - Tests multiple primer lengths
'   - Extracts potential USER cleavage motifs
'   - Uses the UDG Efficiency table to score candidates
'
=====

' Name of worksheet containing UDG efficiency data
' Column A: efficiency score
' Column B: forward 7-mer motif (T-centered; represents U after synthesis)
Private Const UDG_SHEET As String = "UDG Efficiency"
```

```

Private Const ROW_FIRST As Long = 2
Private Const ROW_LAST As Long = 4097

'
=====
' ENTRY POINT
'
=====

Public Sub ScanSingleGenomeSequence()

    ' Example genome region (normally pulled from assembly junction)
    Dim genomeSeq As String
    genomeSeq = Range("A1").Value    ' genome sequence pasted into cell A1

    If Len(genomeSeq) < 50 Then
        MsgBox "Genome sequence too short for primer design."
        Exit Sub
    End If

    Dim i As Long, primerLen As Long
    Dim bestScore As Double
    Dim bestPrimer As String
    Dim bestMotif As String
    Dim tm As Double

    bestScore = 0

    ' -----
--    ' Slide along genome sequence
    ' -----
--
    ' This represents scanning along one junction region.
    ' Each position i is a potential primer start site.
    For i = 1 To Len(genomeSeq)

        ' Test multiple primer lengths
        For primerLen = 18 To 32

            ' Ensure primer fits in the genome sequence
            If i + primerLen - 1 > Len(genomeSeq) Then Exit For

            Dim primer As String
            primer = Mid(genomeSeq, i, primerLen)

            ' -----
--            ' BASIC USER DESIGN CONSTRAINTS
            ' -----
--

            ' GC clamp at both ends
            If Not IsGC(Left(primer, 1)) Then GoTo NextPrimer
            If Not IsGC(Right(primer, 1)) Then GoTo NextPrimer

            ' USER-specific constraints:
            ' - second base must be A

```

```

' - penultimate base must be T (converted to U)
If Mid(primer, 2, 1) <> "A" Then GoTo NextPrimer
If Mid(primer, primerLen - 1, 1) <> "T" Then GoTo NextPrimer

' Avoid long homopolymers (≥5 identical bases)
If HasHomopolymer(primer, 5) Then GoTo NextPrimer
' Only keep primers in the desired Tm window
tm = ComputeTmSimple(primer)
If tm < 60 Or tm > 65 Then GoTo NextPrimer

' -----
' IDENTIFY USER CLEAVAGE MOTIF
' -----
'USER cleavage efficiency depends on a 7-base motif centered on T
' The T corresponds to U in the synthesized primer.
Dim centerPos As Long
centerPos = primerLen - 1 ' penultimate base

If centerPos < 4 Or centerPos + 3 > primerLen Then GoTo
NextPrimer

Dim motif7 As String
motif7 = Mid(primer, centerPos - 3, 7)

' -----
' LOOK UP UDG EFFICIENCY
' -----
Dim efficiency As Double
efficiency = LookupUDGEfficiency(motif7)

' Keep best scoring primer
If efficiency > bestScore Then
    bestScore = efficiency
    bestPrimer = primer
    bestMotif = motif7
End If

NextPrimer:
    Next primerLen
Next i

' -----
' REPORT RESULT
' -----
Range("C1").Value = "Best Primer"
Range("C2").Value = bestPrimer

Range("D1").Value = "Best 7-mer Motif"
Range("D2").Value = bestMotif

Range("E1").Value = "UDG Efficiency Score"
Range("E2").Value = bestScore

MsgBox "Scan complete. Best USER overlap identified."

End Sub

```

## Supporting Utility Functions

```
'  
=====
```

```
Private Function LookupUDGEfficiency(motif As String) As Double
```

```
    Dim ws As Worksheet  
    Set ws = Worksheets(UDG_SHEET)
```

```
    Dim r As Long  
    For r = ROW_FIRST To ROW_LAST  
        If ws.Cells(r, 2).Value = motif Then  
            LookupUDGEfficiency = ws.Cells(r, 1).Value  
            Exit Function  
        End If  
    Next r
```

```
    ' Motif not found  
    LookupUDGEfficiency = 0
```

```
End Function
```

```
'  
=====
```

```
Private Function IsGC(b As String) As Boolean
```

```
    IsGC = (b = "G" Or b = "C")
```

```
End Function
```

```
Private Function HasHomopolymer(s As String, n As Long) As Boolean
```

```
    HasHomopolymer = _  
        InStr(s, String(n, "A")) > 0 Or _  
        InStr(s, String(n, "T")) > 0 Or _  
        InStr(s, String(n, "C")) > 0 Or _  
        InStr(s, String(n, "G")) > 0
```

```
End Function
```

```
'  
=====
```

## SIMPLIFIED MELTING TEMPERATURE CALCULATION

```
' This function calculates primer melting temperature (Tm) using  
' nearest-neighbor thermodynamics (SantaLucia model) with a basic  
' salt correction. It returns a single corrected Tm value in °C.
```

```
' This is a simplified but scientifically faithful version of the  
' full ComputeTm routine used in the complete pipeline.
```

```
'  
=====
```

```
Private Function ComputeTmSimple(seq As String) As Double
```

```

' Physical constants
Const R As Double = 1.987           ' cal/(K·mol)
Const Na As Double = 0.05           ' 50 mM monovalent salt
Const Ct As Double = 0.00000005    ' strand concentration

Dim dH As Double, dS As Double
Dim i As Long

' -----
' Nearest-neighbor enthalpy and entropy contributions
' -----
For i = 1 To Len(seq) - 1
  Select Case Mid(seq, i, 2)
    Case "AA", "TT": dH = dH - 7.9: dS = dS - 22.2
    Case "AT":      dH = dH - 7.2: dS = dS - 20.4
    Case "TA":      dH = dH - 7.2: dS = dS - 21.3
    Case "CA", "TG": dH = dH - 8.5: dS = dS - 22.7
    Case "GT", "AC": dH = dH - 8.4: dS = dS - 22.4
    Case "CT", "AG": dH = dH - 7.8: dS = dS - 21.0
    Case "GA", "TC": dH = dH - 8.2: dS = dS - 22.2
    Case "CG":      dH = dH - 10.6: dS = dS - 27.2
    Case "GC":      dH = dH - 9.8:  dS = dS - 24.4
    Case "GG", "CC": dH = dH - 8.0:  dS = dS - 19.9
  End Select
Next i

' -----
' Terminal base corrections
' -----
If IsGC(Left(seq, 1)) Then dH = dH + 0.1: dS = dS - 2.8 Else dH = dH +
2.3: dS = dS + 4.1
If IsGC(Right(seq, 1)) Then dH = dH + 0.1: dS = dS - 2.8 Else dH = dH +
2.3: dS = dS + 4.1

' -----
' Salt correction (SantaLucia)
' -----
dS = dS + 0.368 * (Len(seq) - 1) * Log(Na)

' -----
' Final melting temperature (°C)
' -----
ComputeTmSimple = (dH / (dS + R * Log(Ct))) * 1000 - 273.15

End Function

```
